# Supplementary material for: A Million-Cow Genome-Wide Association Study of Three Fertility Traits in U.S. Holstein Cows
Source: Int J Mol Sci. 2023 Jun 22;24(13):10496. doi: 10.3390/ijms241310496 (PMC10341978; doi:10.3390/ijms241310496)
Supplement: Supplementary file 1 [file ijms-24-10496-s001.zip]

Archive with 12 entries (12 files):
- Supplementary_materials/Supplementary_material.pdf
- Supplementary_materials/Table_S1.xlsx
- Supplementary_materials/Table_S10.xlsx
- Supplementary_materials/Table_S11.xlsx
- Supplementary_materials/Table_S2.xlsx
- Supplementary_materials/Table_S3.xlsx
- Supplementary_materials/Table_S4.xlsx
- Supplementary_materials/Table_S5.xlsx
- Supplementary_materials/Table_S6.xlsx
- Supplementary_materials/Table_S7.xlsx
- Supplementary_materials/Table_S8.xlsx
- Supplementary_materials/Table_S9.xlsx
