# Supplementary material for: A Million-Cow Genome-Wide Association Study of Three Fertility Traits in U.S. Holstein Cows
Source: Int J Mol Sci. 2023 Jun 22;24(13):10496. doi: 10.3390/ijms241310496 (PMC10341978; doi:10.3390/ijms241310496)
Supplement: Supplementary file 1 [file ijms-24-10496-s001.zip › Supplementary_materials/Table_S1.xlsx]

## Sheet: s1
SNP	Chr	position	Candidate gene	Trait	Test	Effect	log10(1/p)	al+	ae+	ae+2	f-al+	al-	ae-	ae-2	f-al-	rank
rs133832615	1	60497520	LSAMP	dpr	a	-0.808522	28.3769	2	0.0462	0.05951	0.943	1	-0.762	-0.749012	0.0571	459
rs109155375	1	62364649	bta-mir-2285de(u)	dpr	a	0.777593	35.824	1	0.0616	0.077971	0.921	2	-0.716	-0.699622	0.0792	183
rs43244044	1	66515809	ILDR1	dpr	a	-0.448162	24.0768	2	0.0792	0.097002	0.823	1	-0.369	-0.35116	0.177	801
rs137209107	1	68043046	MYLK	dpr	a	0.740168	34.5825	1	0.064	0.079728	0.914	2	-0.676	-0.660439	0.0865	215
rs110035804	1	68293671	CCDC14	dpr	a	1.08933	45.6057	1	0.0561	0.064294	0.949	2	-1.03	-1.02503	0.0515	64
rs132847403	1	68792344	KALRN	dpr	a	1.11027	47.3492	1	0.0559	0.071724	0.95	2	-1.05	-1.03855	0.0503	49
rs135573340	1	68801039	KALRN	dpr	a	-0.456462	23.9757	2	0.0767	0.094447	0.832	1	-0.38	-0.362015	0.168	816
rs133450760	1	68949628	KALRN	dpr	a	0.593014	26.0938	1	0.0601	0.078832	0.899	2	-0.533	-0.514182	0.101	618
rs110966376	1	68970032	KALRN	dpr	a	0.46954	25.4467	1	0.0795	0.097297	0.831	2	-0.39	-0.372243	0.169	670
rs109899807	1	69009235	KALRN	dpr	a	-0.689226	25.9477	2	0.0495	0.067213	0.928	1	-0.64	-0.622013	0.0718	628
rs109226252	1	69009734	KALRN	dpr	a	-0.753124	28.0678	2	0.0494	0.065761	0.934	1	-0.704	-0.687363	0.0656	480
rs109205828	1	69012232	KALRN	dpr	a	0.826688	32.104	1	0.0505	0.068217	0.939	2	-0.776	-0.758471	0.0611	290
rs109790791	1	69102381	KALRN	dpr	a	1.07875	47.0045	1	0.0573	0.074696	0.947	2	-1.02	-1.00405	0.0531	52
rs109183586	1	69266076	ITGB5	dpr	a	-0.332402	22.8154	2	0.17	0.187714	0.489	1	-0.162	-0.144688	0.511	961
rs133043503	1	69372317	ENSBTAG00000048794-HEG1	dpr	a	0.374794	23.7456	1	0.109	0.126036	0.71	2	-0.266	-0.248758	0.29	853
rs133558279	1	69551363	SLC12A8	dpr	a	-0.640819	28.425	2	0.0604	0.077126	0.906	1	-0.58	-0.563693	0.0942	452
rs137814900	1	70735271	TFRC-ZDHHC19	dpr	a	0.885937	38.4727	1	0.0575	0.074558	0.935	2	-0.828	-0.81138	0.0649	125
rs109960856	1	71471058	PIGZ-MELTF	dpr	a	0.410439	22.7362	1	0.0847	0.101682	0.794	2	-0.326	-0.308757	0.206	969
rs41628925	1	71760764	DLG1	dpr	a	-0.413187	23.0261	2	0.0851	0.102585	0.794	1	-0.328	-0.310601	0.206	934
rs110693378	1	72236014	ACAP2	dpr	a	-0.360965	22.5004	2	0.108	0.125095	0.7	1	-0.253	-0.23587	0.3	988
rs43705539	1	72880876	LSG1	dpr	a	0.34908	23.6082	1	0.134	0.150636	0.617	2	-0.215	-0.198444	0.383	869
rs42233268	1	108812518	RARRES1	dpr	a	0.339996	23.6684	1	0.158	0.175361	0.537	2	-0.182	-0.164635	0.463	863
rs110764446	1	111601491	LOC107132205	dpr	a	0.451975	23.8433	1	0.375	0.391862	0.171	2	-0.0774	-0.060113	0.829	840
rs41897673	1	111868602	SLC33A1-C1H3orf33	dpr	a	-0.406191	29.2731	2	0.129	0.146667	0.682	1	-0.277	-0.259523	0.318	397
rs43259472	1	113896073	Metazoa-SRP-ENSBTAG00000047341	dpr	a	-0.337967	22.7811	2	0.199	0.216503	0.41	1	-0.139	-0.121464	0.59	965
rs137027514	1	114541369	ENSBTAG00000048392-RAP2B	dpr	a	0.482361	26.7406	1	0.399	0.409378	0.172	2	-0.0831	-0.072983	0.828	567
rs134691243	1	116818789	MED12L	dpr	a	-0.477995	26.465	2	0.396	0.413176	0.171	1	-0.0816	-0.064819	0.829	590
rs41987452	1	118310100	RNF13	dpr	a	0.340483	23.2911	1	0.198	0.215135	0.419	2	-0.143	-0.125349	0.581	901
rs137842501	1	119741926	AGTR1-ENSBTAG00000046008	dpr	a	-0.372647	27.8507	2	0.215	0.233985	0.422	1	-0.157	-0.138662	0.578	492
rs135457890	1	120318966	ENSBTAG00000050282	dpr	a	0.360214	23.5468	1	0.135	0.150526	0.625	2	-0.225	-0.209687	0.375	874
rs41578204	1	120419996	ENSBTAG00000050282-ZIC1	dpr	a	0.351446	23.4163	1	0.128	0.145383	0.637	2	-0.224	-0.206063	0.363	886
rs43263793	1	121708616	U2-PLSCR5	dpr	a	-0.367491	25.163	2	0.222	0.234089	0.396	1	-0.146	-0.133402	0.604	697
rs43263121	1	121839325	U2-PLSCR5	dpr	a	-0.335007	22.4643	2	0.182	0.193564	0.458	1	-0.153	-0.141443	0.542	991
rs110230312	1	121946677	PLSCR2	dpr	a	0.33757	23.4039	1	0.179	0.196581	0.47	2	-0.159	-0.140989	0.53	888
rs385878988	1	123269176	blank	dpr	a	-0.363086	24.26	2	0.125	0.139058	0.655	1	-0.238	-0.224027	0.345	789
rs136570493	1	123931322	5S-rRNA-ENSBTAG00000049240	dpr	a	-0.347298	23.6054	2	0.155	0.171147	0.554	1	-0.193	-0.176151	0.446	870
rs41568872	1	125202968	SLC9A9	dpr	a	-0.346356	24.4948	2	0.189	0.206803	0.454	1	-0.157	-0.139553	0.546	769
rs109227365	1	127609336	ZBTB38	dpr	a	-0.389352	24.259	2	0.286	0.301939	0.266	1	-0.104	-0.087413	0.734	790
rs109985403	1	128050323	SLC25A36-ENSBTAG00000052041	dpr	a	0.386484	29.586	1	0.228	0.246242	0.409	2	-0.158	-0.140242	0.591	382
rs109999683	1	128184812	ENSBTAG00000052041-TRIM42	dpr	a	-0.362344	22.9926	2	0.25	0.268962	0.309	1	-0.112	-0.093382	0.691	941
rs42527375	1	128678487	CLSTN2	dpr	a	0.343673	23.6398	1	0.142	0.160195	0.585	2	-0.201	-0.183479	0.415	866
rs42526539	1	128772530	CLSTN2	dpr	a	0.404428	30.5102	1	0.264	0.280996	0.348	2	-0.141	-0.123432	0.652	349
rs110301946	1	128830820	CLSTN2	dpr	a	0.432875	30.362	1	0.118	0.136049	0.728	2	-0.315	-0.296826	0.272	352
rs42775876	1	129216843	ENSBTAG00000051936(u)	dpr	a	0.342709	23.9228	1	0.19	0.207676	0.446	2	-0.153	-0.135034	0.554	828
rs110588357	1	129419915	ENSBTAG00000051936	dpr	a	-0.355131	25.5835	2	0.199	0.216	0.44	1	-0.156	-0.13913	0.56	652
rs3423123264	1	129970365	LOC112447798	dpr	a	-0.40612	32.7293	2	0.176	0.19108	0.567	1	-0.23	-0.21504	0.433	274
rs43268082	1	130225374	FOXL2-PIK3CB	dpr	a	0.384846	30.2497	1	0.19	0.207465	0.505	2	-0.194	-0.177381	0.495	357
rs41994531	1	130269306	LOC782895	dpr	a	0.388256	28.725	1	0.141	0.15899	0.636	2	-0.247	-0.229266	0.364	433
rs136875114	1	130963070	DBR1-A4GNT	dpr	a	0.517831	27.269	1	0.0753	0.093623	0.855	2	-0.443	-0.424208	0.145	539
rs135485368	1	132368058	SLC35G2-ENSBTAG00000054797	dpr	a	-0.417266	35.3259	2	0.227	0.244868	0.456	1	-0.19	-0.172398	0.544	195
rs43271805	1	132917243	STAG1	dpr	a	0.425094	35.2013	1	0.26	0.27765	0.389	2	-0.165	-0.147444	0.611	200
rs43275195	1	133591491	PPP2R3A-ENSBTAG00000051032	dpr	a	0.436165	38.2535	1	0.248	0.2658	0.432	2	-0.188	-0.170365	0.568	131
rs110736095	1	133687413	PPP2R3A-ENSBTAG00000051032	dpr	a	-0.387177	30.136	2	0.201	0.219373	0.482	1	-0.187	-0.167804	0.518	359
rs135280029	1	133745828	PPP2R3A-ENSBTAG00000051032	dpr	a	0.359944	25.8905	1	0.179	0.197959	0.502	2	-0.181	-0.161985	0.498	633
rs137546002	1	133833175	ENSBTAG00000051032-U6	dpr	a	0.357541	25.7722	1	0.168	0.189711	0.529	2	-0.189	-0.16783	0.471	642
rs109408005	1	133946585	U6-EPHB1	dpr	a	-0.34241	22.4941	2	0.126	0.144529	0.631	1	-0.216	-0.197881	0.369	989
rs43271956	1	134235622	EPHB1	dpr	a	-0.380139	28.9981	2	0.185	0.206451	0.513	1	-0.195	-0.173688	0.487	418
rs110045848	1	134365317	EPHB1	dpr	a	0.477479	43.4494	1	0.3	0.317388	0.372	2	-0.178	-0.160091	0.628	78
rs110646735	1	134425704	EPHB1	dpr	a	-0.475884	43.4136	2	0.296	0.313846	0.378	1	-0.18	-0.162038	0.622	79
rs110714569	1	134451541	EPHB1	dpr	a	0.394982	30.6802	1	0.183	0.199218	0.536	2	-0.212	-0.195764	0.464	342
rs109272208	1	134475334	EPHB1	dpr	a	-0.42642	37.0969	2	0.204	0.221297	0.523	1	-0.223	-0.205123	0.477	151
rs110792885	1	134531830	EPHB1	dpr	a	0.347347	23.1165	1	0.134	0.155029	0.613	2	-0.213	-0.192317	0.387	922
rs111013611	1	134580004	EPHB1-ENSBTAG00000054179	dpr	a	-0.375949	28.6938	2	0.17	0.187647	0.549	1	-0.206	-0.188302	0.451	435
rs111024607	1	134707028	KY	dpr	a	0.470911	42.6923	1	0.291	0.308447	0.382	2	-0.18	-0.162464	0.618	86
rs43272864	1	134840582	ANAPC13	dpr	a	-0.470935	44.1216	2	0.274	0.290972	0.418	1	-0.197	-0.179963	0.582	71
rs109399847	1	134846080	ANAPC13-AMOTL2	dpr	a	0.338106	23.0665	1	0.161	0.180331	0.525	2	-0.177	-0.157774	0.475	929
rs43274500	1	135357858	SLCO2A1	dpr	a	0.356493	23.9288	1	0.142	0.158878	0.601	2	-0.214	-0.197614	0.399	826
rs43274494	1	135368478	SLCO2A1	dpr	a	-0.366852	26.5013	2	0.169	0.187546	0.54	1	-0.198	-0.179306	0.46	583
rs43274482	1	135372297	SLCO2A1	dpr	a	-0.351906	23.7193	2	0.141	0.164817	0.599	1	-0.211	-0.187089	0.401	857
rs43274475	1	135372854	SLCO2A1	dpr	a	0.351936	23.7244	1	0.141	0.164642	0.599	2	-0.211	-0.187295	0.401	855
rs108971563	1	135694180	INHCA-TOPBP1	dpr	a	-0.369969	25.1969	2	0.245	0.261876	0.338	1	-0.125	-0.108093	0.662	692
rs110009880	1	135892805	CDV3-U8	dpr	a	0.373993	22.3898	1	0.0992	0.116844	0.735	2	-0.275	-0.257149	0.265	1000
rs133207289	1	135912745	U8-BFSP2	dpr	a	-0.347067	24.0495	2	0.168	0.190257	0.517	1	-0.179	-0.15681	0.483	806
rs109857170	1	136142168	TMEM108	dpr	a	-0.416726	30.8284	2	0.284	0.301499	0.319	1	-0.133	-0.115227	0.681	336
rs41657135	1	136567103	ENSBTAG00000049758-ENSBTAG00000049044	dpr	a	0.458879	42.6275	1	0.205	0.222972	0.553	2	-0.254	-0.235907	0.447	88
rs135739009	1	137008061	ACAD11	dpr	a	-0.429259	36.3995	2	0.253	0.267279	0.41	1	-0.176	-0.161979	0.59	170
rs134500893	1	137073760	DNAJC13	dpr	a	0.42987	35.5798	1	0.263	0.277515	0.387	2	-0.166	-0.152355	0.613	187
rs42578484	1	137177065	DNAJC13	dpr	a	0.479783	39.3045	1	0.337	0.354978	0.297	2	-0.143	-0.124805	0.703	116
rs43274059	1	137344320	ENSBTAG00000054801-ENSBTAG00000049430	dpr	a	-0.405953	33.8737	2	0.198	0.215602	0.513	1	-0.208	-0.190352	0.487	242
rs41619822	1	137738847	CPNE4	dpr	a	-0.420357	35.8678	2	0.231	0.248997	0.45	1	-0.189	-0.17136	0.55	182
rs137487634	1	138268870	CPNE4	dpr	a	0.383482	26.2075	1	0.261	0.279097	0.319	2	-0.122	-0.104386	0.681	606
rs42914660	1	138504840	MRPL3-NUDT16	dpr	a	-0.479238	42.1459	2	0.317	0.334173	0.339	1	-0.163	-0.145065	0.661	90
rs3423125161	1	138547338	MRPL3-NUDT16	dpr	a	-0.34677	24.1018	2	0.151	0.166611	0.564	1	-0.196	-0.180159	0.436	800
rs42736568	1	138624600	NEK11	dpr	a	0.340533	23.3424	1	0.147	0.164332	0.57	2	-0.194	-0.176201	0.43	895
rs110933106	1	138740420	NEK11	dpr	a	-0.34188	23.7728	2	0.154	0.169842	0.55	1	-0.188	-0.172038	0.45	848
rs110315716	1	139027128	ATP2C1-ENSBTAG00000050167	dpr	a	0.461266	38.2287	1	0.312	0.329557	0.325	2	-0.15	-0.131709	0.675	132
rs109788394	1	139184646	ENSBTAG00000050167-PSMG1	dpr	a	-0.538946	51.9777	2	0.362	0.380017	0.328	1	-0.177	-0.15893	0.672	24
rs136312021	1	139248003	BRWD1	dpr	a	-0.545856	51.0902	2	0.38	0.3972	0.305	1	-0.166	-0.148656	0.695	29
rs110290820	1	139293876	BRWD1	dpr	a	-0.446236	40.2459	2	0.248	0.265083	0.445	1	-0.199	-0.181153	0.555	108
rs136434336	1	139316075	BRWD1	dpr	a	0.34337	23.8442	1	0.164	0.182043	0.522	2	-0.179	-0.161327	0.478	839
rs110277498	1	139455671	GET1	dpr	a	-0.450898	40.9727	2	0.255	0.272878	0.434	1	-0.196	-0.17802	0.566	97
rs43275844	1	139828817	IGSF5	dpr	a	-0.576441	54.587	2	0.414	0.431555	0.281	1	-0.162	-0.144886	0.719	18
rs41643395	1	139937600	PCP4	dpr	a	-0.377204	28.5635	2	0.22	0.23741	0.418	1	-0.158	-0.139794	0.582	445
rs29026456	1	140005163	PCP4	dpr	a	0.367164	27.4549	1	0.167	0.185257	0.544	2	-0.2	-0.181907	0.456	527
rs109032238	1	140095860	PCP4-DSCAM	dpr	a	-0.391372	31.2907	2	0.19	0.208169	0.514	1	-0.201	-0.183203	0.486	315
rs109784333	1	140164749	DSCAM	dpr	a	-0.558498	52.4795	2	0.395	0.412198	0.293	1	-0.164	-0.1463	0.707	22
rs42384258	1	140271143	DSCAM	dpr	a	-0.495216	46.8165	2	0.304	0.320392	0.386	1	-0.191	-0.174824	0.614	56
rs137362290	1	140316047	DSCAM	dpr	a	0.377874	28.9032	1	0.184	0.197353	0.513	2	-0.194	-0.180521	0.487	424
rs109629089	1	140348608	DSCAM	dpr	a	-0.390457	31.1179	2	0.209	0.226124	0.464	1	-0.181	-0.164333	0.536	321
rs43279718	1	140376046	DSCAM	dpr	a	0.421215	36.3295	1	0.212	0.229734	0.497	2	-0.209	-0.191481	0.503	172
rs110226678	1	140642688	DSCAM	dpr	a	-0.360057	24.8292	2	0.227	0.244904	0.368	1	-0.133	-0.115152	0.632	737
rs135842555	1	140707368	DSCAM	dpr	a	0.392506	29.7908	1	0.234	0.250233	0.403	2	-0.158	-0.142273	0.597	370
rs137528949	1	140711452	DSCAM	dpr	a	-0.39134	29.6143	2	0.234	0.249113	0.403	1	-0.158	-0.142226	0.597	381
rs133680031	1	140713996	DSCAM	dpr	a	-0.385908	29.5275	2	0.23	0.247662	0.403	1	-0.156	-0.138245	0.597	384
rs41667429	1	140838043	U6-7SK	dpr	a	-0.34364	23.6554	2	0.192	0.210381	0.44	1	-0.151	-0.133259	0.56	864
rs41255962	1	141049132	7SK-ENSBTAG00000048701	dpr	a	0.499196	49.9578	1	0.275	0.294168	0.449	2	-0.224	-0.205028	0.551	34
rs43275363	1	141082789	7SK-ENSBTAG00000048701	dpr	a	0.400408	28.5695	1	0.139	0.159751	0.654	2	-0.262	-0.240658	0.346	443
rs110625328	1	141162264	7SK-ENSBTAG00000048701	dpr	a	-0.339053	23.1695	2	0.186	0.204086	0.451	1	-0.153	-0.134967	0.549	917
rs43276439	1	141195303	LOC104970303	dpr	a	-0.391787	31.3096	2	0.188	0.203774	0.52	1	-0.204	-0.188013	0.48	312
rs43276488	1	141255563	7SK-ENSBTAG00000048701	dpr	a	-0.366893	27.1696	2	0.16	0.178913	0.563	1	-0.206	-0.187981	0.437	545
rs41639230	1	141395382	BACE2	dpr	a	-0.384354	27.3214	2	0.133	0.149871	0.655	1	-0.252	-0.234483	0.345	536
rs109370025	1	141611675	FAM3B	dpr	a	-0.428982	36.4248	2	0.175	0.192816	0.592	1	-0.254	-0.236167	0.408	168
rs109625116	1	141628781	MX2	dpr	a	0.366835	23.8073	1	0.123	0.143986	0.666	2	-0.244	-0.222849	0.334	844
rs137367395	1	141650947	MX2	dpr	a	-0.443716	28.1708	2	0.106	0.130652	0.761	1	-0.338	-0.313064	0.239	475
rs136975596	1	141669989	MX1	dpr	a	0.443413	28.1452	1	0.106	0.130742	0.761	2	-0.337	-0.312672	0.239	477
rs109798998	1	141793240	TMPRSS2-ENSBTAG00000050235	dpr	a	-0.380198	28.2284	2	0.233	0.250671	0.387	1	-0.147	-0.129527	0.613	471
rs109418628	1	141915687	ENSBTAG00000046015-RIPK4	dpr	a	0.534414	46.9577	1	0.385	0.400269	0.28	2	-0.15	-0.134145	0.72	54
rs109033158	1	142066408	PRDM15	dpr	a	-0.55571	49.1916	2	0.407	0.424099	0.267	1	-0.148	-0.131611	0.733	37
rs109033222	1	142114021	PRDM15	dpr	a	-0.388276	27.5966	2	0.131	0.149445	0.662	1	-0.257	-0.23883	0.338	515
rs109951084	1	142136010	PRDM15-C2CD2	dpr	a	-0.377842	26.4986	2	0.132	0.151192	0.651	1	-0.246	-0.22665	0.349	584
rs41639207	1	142168313	C2CD2	dpr	a	-0.431985	35.8881	2	0.163	0.180453	0.623	1	-0.269	-0.251532	0.377	181
rs108997449	1	142329853	UMODL1	dpr	a	-0.449688	33.8814	2	0.129	0.145667	0.714	1	-0.321	-0.304021	0.286	241
rs43277247	1	142348994	UMODL1	dpr	a	-0.462336	36.1551	2	0.143	0.164983	0.69	1	-0.319	-0.297353	0.31	177
rs109874240	1	142636491	TFF1-TMPRSS3	dpr	a	0.371478	26.1445	1	0.133	0.151201	0.641	2	-0.238	-0.220277	0.359	612
rs109593093	1	142753326	UBASH3A-RSPH1	dpr	a	-0.48151	38.9256	2	0.342	0.361043	0.289	1	-0.139	-0.120467	0.711	121
rs134340793	1	142813067	SLC37A1	dpr	a	-0.487258	39.3279	2	0.342	0.364371	0.297	1	-0.145	-0.122887	0.703	115
rs41586699	1	143029010	PDE9A	dpr	a	-0.479739	36.8745	2	0.128	0.145469	0.734	1	-0.352	-0.334271	0.266	160
rs43278942	1	143055392	PDE9A-WDR4	dpr	a	-0.465575	33.8323	2	0.126	0.145438	0.73	1	-0.34	-0.320138	0.27	244
rs42140243	1	143093430	WDR4	dpr	a	0.47423	35.0179	1	0.129	0.147377	0.728	2	-0.345	-0.326852	0.272	204
rs109645267	1	143124335	NDUFV3	dpr	a	-0.443702	33.1704	2	0.128	0.148725	0.711	1	-0.315	-0.294977	0.289	261
rs42141315	1	143227118	CBS	dpr	a	-0.403689	30.7462	2	0.145	0.161443	0.64	1	-0.258	-0.242246	0.36	337
rs109455756	1	143526075	SIK1-ENSBTAG00000052654	dpr	a	-0.430958	35.5029	2	0.272	0.2889	0.37	1	-0.159	-0.142058	0.63	190
rs108941866	1	143558129	SIK1-ENSBTAG00000052654	dpr	a	0.441408	39.1899	1	0.195	0.211886	0.558	2	-0.246	-0.229522	0.442	119
rs109484604	1	143725156	HSF2BP	dpr	a	-0.359448	23.7056	2	0.237	0.251269	0.341	1	-0.123	-0.108179	0.659	860
rs110604814	1	143747418	RRP1B	dpr	a	0.359604	22.8208	1	0.112	0.130334	0.688	2	-0.248	-0.22927	0.312	960
rs136711996	1	143781586	RRP1B-PDXK	dpr	a	0.435915	36.3339	1	0.182	0.202085	0.582	2	-0.254	-0.23383	0.418	171
rs41255287	1	143807962	PDXK	dpr	a	0.440319	37.038	1	0.184	0.202453	0.583	2	-0.257	-0.237866	0.417	154
rs137789945	1	143849610	CSTB	dpr	a	-0.433997	27.0208	2	0.0981	0.116874	0.774	1	-0.336	-0.317123	0.226	553
rs3423125400	1	143851649	RRP1	dpr	a	0.378387	28.1212	1	0.215	0.2327	0.432	2	-0.164	-0.145687	0.568	478
rs134344312	1	143990473	AGPAT3	dpr	a	0.363048	24.5039	1	0.237	0.257466	0.347	2	-0.126	-0.105582	0.653	765
rs109363858	1	144030480	AGPAT3-TRAPPC10	dpr	a	-0.405533	31.301	2	0.173	0.188887	0.573	1	-0.232	-0.216647	0.427	313
rs43021837	1	144444371	TSPEAR	dpr	a	-0.469795	38.1452	2	0.327	0.34531	0.303	1	-0.142	-0.124484	0.697	133
rs109429281	1	144594088	TSPEAR	dpr	a	-0.455	34.6402	2	0.322	0.339803	0.293	1	-0.133	-0.115197	0.707	213
rs110597143	1	144595788	TSPEAR	dpr	a	-0.435188	33.051	2	0.139	0.152495	0.681	1	-0.296	-0.282693	0.319	264
rs110398816	1	144679366	UBE2G2	dpr	a	-0.385044	28.7849	2	0.162	0.180084	0.579	1	-0.223	-0.204961	0.421	429
rs41255628	1	144714475	PTTG1IP	dpr	a	-0.443439	35.3186	2	0.144	0.162034	0.675	1	-0.299	-0.281405	0.325	196
rs110499929	1	144934983	ENSBTAG00000053509-ADARB1	dpr	a	-0.343112	23.7611	2	0.196	0.211647	0.429	1	-0.147	-0.131465	0.571	849
rs42426753	1	145748929	COL6A1-COL6A2	dpr	a	0.37227	28.4602	1	0.196	0.215288	0.472	2	-0.176	-0.156982	0.528	450
rs43253847	1	146031484	PCNT	dpr	a	-0.374565	25.4452	2	0.123	0.141608	0.672	1	-0.252	-0.232957	0.328	671
rs109651740	1	146049912	PCNT	dpr	a	-0.372646	24.9089	2	0.12	0.137507	0.678	1	-0.253	-0.235139	0.322	728
rs134226669	1	146080279	PCNT	dpr	a	-0.374298	27.5481	2	0.171	0.191072	0.544	1	-0.204	-0.183226	0.456	521
rs41638891	1	146106955	PCNT-DIP2A	dpr	a	0.378647	23.9911	1	0.271	0.287796	0.285	2	-0.108	-0.09085	0.715	814
rs109680710	1	146185449	DIP2A	dpr	a	0.391819	30.5423	1	0.164	0.182464	0.582	2	-0.228	-0.209355	0.418	347
rs109840008	1	146320854	PRMT2	dpr	a	0.407656	33.826	1	0.201	0.21973	0.507	2	-0.207	-0.187927	0.493	245
rs137001288	1	146384948	PRMT2-ENSBTAG00000052513	dpr	a	0.407273	27.5781	1	0.119	0.138624	0.708	2	-0.288	-0.268649	0.292	516
rs41602408	1	146497300	ENSBTAG00000052513-FBXO25	dpr	a	-0.351851	25.1929	2	0.158	0.177731	0.55	1	-0.193	-0.17412	0.45	693
rs137351074	1	146512027	ENSBTAG00000052513-FBXO25	dpr	a	0.359959	24.8793	1	0.162	0.187585	0.55	2	-0.198	-0.172373	0.45	731
rs43282015	1	146612774	ENSBTAG00000054155	dpr	a	0.367386	27.2165	1	0.157	0.175087	0.572	2	-0.21	-0.192299	0.428	543
rs134570231	1	146870110	ENSBTAG00000046447	dpr	a	-0.375409	28.3265	2	0.162	0.177014	0.569	1	-0.214	-0.198395	0.431	464
rs136555966	1	146877448	ENSBTAG00000046447	dpr	a	-0.463336	27.3498	2	0.37	0.387171	0.202	1	-0.0935	-0.076165	0.798	534
rs137464422	1	146888322	ENSBTAG00000046447-RUNX1	dpr	a	0.368772	25.2961	1	0.136	0.156277	0.631	2	-0.233	-0.212495	0.369	679
rs136210522	1	146913802	ENSBTAG00000046447-RUNX1	dpr	a	0.351998	24.896	1	0.166	0.187955	0.53	2	-0.186	-0.164042	0.47	729
rs110383845	1	146981113	RUNX1	dpr	a	0.371369	23.6913	1	0.26	0.275871	0.299	2	-0.111	-0.095499	0.701	861
rs110246129	1	147251560	RUNX1(d)	dpr	a	0.410152	22.4159	1	0.32	0.342514	0.219	2	-0.09	-0.067638	0.781	995
rs43279180	1	147531680	LOC112448047	dpr	a	0.332487	22.8028	1	0.164	0.182245	0.505	2	-0.168	-0.150242	0.495	962
rs135998162	1	147906163	ENSBTAG00000030105(u)	dpr	a	0.392915	25.4796	1	0.275	0.297365	0.3	2	-0.118	-0.095551	0.7	664
rs110848612	1	148262558	ENSBTAG00000030105-SETD4	dpr	a	-0.35377	23.0491	2	0.119	0.135964	0.665	1	-0.235	-0.217807	0.335	930
rs108966795	1	148909835	CLDN14-5S-rRNA	dpr	a	-0.341658	23.722	2	0.189	0.207422	0.448	1	-0.153	-0.134236	0.552	856
rs133100876	1	149037674	SIM2-HLCS	dpr	a	-0.381377	22.837	2	0.282	0.301972	0.26	1	-0.0993	-0.079405	0.74	956
rs134302717	3	45464366	DPYD	dpr	a	0.394107	28.7107	1	0.143	0.160821	0.638	2	-0.252	-0.233286	0.362	434
rs208464932	3	48660453	SLC44A3	dpr	a	0.432019	23.8847	1	0.0844	0.102215	0.805	2	-0.348	-0.329804	0.195	834
rs110990872	3	48766306	SLC44A3-ENSBTAG00000049865	dpr	a	0.362868	25.2199	1	0.135	0.155095	0.627	2	-0.227	-0.207772	0.373	687
rs110210354	3	49367331	ARHGAP29-ABCA4	dpr	a	-0.404169	31.5149	2	0.162	0.177704	0.6	1	-0.243	-0.226465	0.4	305
rs3423152277	3	49440030	ABCA4	dpr	a	-0.432669	35.7849	2	0.169	0.18614	0.609	1	-0.264	-0.246528	0.391	184
rs110718354	3	49549218	ABCA4-GCLM	dpr	a	-0.463484	39.9196	2	0.161	0.178616	0.653	1	-0.303	-0.284868	0.347	113
rs29015114	3	49574985	ABCA4-GCLM	dpr	a	-0.46572	41.418	2	0.174	0.195224	0.627	1	-0.292	-0.270496	0.373	94
rs109452645	3	49615926	DNTTIP2	dpr	a	-0.436184	28.3851	2	0.104	0.121338	0.762	1	-0.332	-0.314845	0.238	456
rs110847699	3	49704431	BCAR3	dpr	a	-0.381387	26.3761	2	0.127	0.146017	0.667	1	-0.255	-0.23537	0.333	595
rs29015745	3	50183719	CCDC18	dpr	a	-0.440046	31.2996	2	0.119	0.139078	0.73	1	-0.321	-0.300968	0.27	314
rs136334841	3	50424463	MTF2-DIPK1A	dpr	a	0.407177	32.3501	1	0.24	0.255433	0.411	2	-0.167	-0.151744	0.589	283
rs133284520	3	50439709	MTF2-DIPK1A	dpr	a	0.482193	46.4253	1	0.211	0.228243	0.563	2	-0.271	-0.25395	0.437	59
rs109830248	3	50493829	MTF2-DIPK1A	dpr	a	-0.364911	26.6121	2	0.153	0.17133	0.581	1	-0.212	-0.193581	0.419	575
rs137796670	3	50608425	DIPK1A	dpr	a	0.383034	23.9405	1	0.276	0.295194	0.279	2	-0.107	-0.08784	0.721	825
rs133023874	3	50750559	EVI5	dpr	a	-0.468719	31.0659	2	0.106	0.120858	0.774	1	-0.363	-0.347861	0.226	325
rs41565752	3	51016576	RPAP2	dpr	a	0.364714	25.7033	1	0.137	0.156012	0.623	2	-0.227	-0.208702	0.377	646
rs29027404	3	52106782	HFM1-ENSBTAG00000055150	dpr	a	-0.3345	23.0056	2	0.18	0.197519	0.463	1	-0.155	-0.136982	0.537	937
rs29017431	3	52452892	bta-mir-2285b-2-BARHL2	dpr	a	-0.440853	25.7849	2	0.0892	0.105968	0.798	1	-0.352	-0.334885	0.202	641
rs133601452	3	52560568	BARHL2(d)	dpr	a	0.474467	37.4562	1	0.136	0.152783	0.713	2	-0.338	-0.321684	0.287	146
rs133923471	3	52705929	BARHL2(d)	dpr	a	-0.400983	32.2959	2	0.17	0.188165	0.575	1	-0.231	-0.212819	0.425	285
rs109715185	3	53136752	ZNF326(u)	dpr	a	-0.371359	27.2015	2	0.15	0.167938	0.597	1	-0.222	-0.203421	0.403	544
rs110248625	3	53435391	LRRC8D	dpr	a	-0.426325	26.0313	2	0.0954	0.113171	0.776	1	-0.331	-0.313154	0.224	624
rs110703562	3	53499168	ENSBTAG00000050182	dpr	a	0.421511	35.7375	1	0.185	0.203716	0.56	2	-0.236	-0.217795	0.44	185
rs133927200	3	53531327	ENSBTAG00000050182-LRRC8C	dpr	a	-0.349937	23.7502	2	0.217	0.235302	0.379	1	-0.133	-0.114635	0.621	851
rs109473220	3	53568487	LRRC8C	dpr	a	-0.421448	23.9523	2	0.334	0.352511	0.208	1	-0.0877	-0.068937	0.792	822
rs135663990	3	53613283	LRRC8C	dpr	a	0.426266	24.3457	1	0.338	0.353688	0.208	2	-0.0886	-0.072577	0.792	783
rs41576211	3	53912691	ENSBTAG00000048959	dpr	a	-0.387695	29.9132	2	0.228	0.245764	0.412	1	-0.16	-0.141931	0.588	368
rs109733519	3	54109833	GBP5	dpr	a	-0.386485	29.7207	2	0.227	0.244942	0.412	1	-0.159	-0.141543	0.588	376
rs134419770	3	56073652	ENSBTAG00000049274-ENSBTAG00000054817	dpr	a	-0.400504	31.953	2	0.199	0.209375	0.503	1	-0.201	-0.191129	0.497	295
rs109141760	3	56224927	ENSBTAG00000049274-ENSBTAG00000054817	dpr	a	0.464752	35.3848	1	0.13	0.149139	0.721	2	-0.335	-0.315612	0.279	192
rs109813524	3	56570708	ENSBTAG00000054817-ENSBTAG00000052091	dpr	a	0.467594	32.331	1	0.11	0.129549	0.765	2	-0.358	-0.338045	0.235	284
rs135673728	3	56635728	ENSBTAG00000052091-LMO4	dpr	a	-0.460301	38.2843	2	0.152	0.167398	0.669	1	-0.308	-0.292902	0.331	130
rs134186285	3	56695480	ENSBTAG00000052091-LMO4	dpr	a	-0.347773	23.8929	2	0.211	0.228578	0.394	1	-0.137	-0.119195	0.606	833
rs110176382	3	56711353	LMO4	dpr	a	0.3589	25.4696	1	0.163	0.171245	0.546	2	-0.196	-0.187655	0.454	666
rs110859152	3	56772414	LOC101903905	dpr	a	0.462271	37.4553	1	0.145	0.16524	0.686	2	-0.317	-0.297031	0.314	147
rs135167982	3	56800055	LOC101903905	dpr	a	0.477061	40.0215	1	0.15	0.164876	0.685	2	-0.327	-0.312184	0.315	110
rs109760682	3	56820450	LMO4-SNORA62	dpr	a	0.485598	34.9099	1	0.115	0.135181	0.764	2	-0.371	-0.350417	0.236	207
rs109643504	3	56872830	SNORA62-ENSBTAG00000052679	dpr	a	-0.382633	28.9233	2	0.174	0.19241	0.544	1	-0.208	-0.190223	0.456	423
rs110891676	3	57147780	SELENOF	dpr	a	0.48513	34.7069	1	0.114	0.135874	0.765	2	-0.371	-0.349256	0.235	211
rs136510285	3	57305215	SH3GLB1	dpr	a	-0.371657	23.8711	2	0.116	0.135979	0.687	1	-0.255	-0.235678	0.313	835
rs208524162	3	57372560	ENSBTAG00000021501	dpr	a	0.480146	34.0609	1	0.113	0.133422	0.765	2	-0.367	-0.346724	0.235	235
rs134999186	3	57407535	LOC112446001	dpr	a	-0.371408	23.1897	2	0.107	0.127016	0.711	1	-0.264	-0.244391	0.289	916
rs109174980	3	57451132	LOC112446001	dpr	a	-0.348345	23.9757	2	0.211	0.229558	0.393	1	-0.137	-0.118786	0.607	817
rs29020505	3	57536054	LOC112446001	dpr	a	-0.479808	34.082	2	0.113	0.133177	0.764	1	-0.367	-0.346632	0.236	233
rs110423614	3	57562191	CLCA1	dpr	a	0.382599	29.2114	1	0.166	0.184282	0.566	2	-0.217	-0.198317	0.434	402
rs132979485	3	57739389	ODF2L-ENSBTAG00000053371	dpr	a	0.37831	24.014	1	0.266	0.277607	0.298	2	-0.113	-0.100703	0.702	809
rs3423158060	3	57762632	ODF2L-ENSBTAG00000053371	dpr	a	0.368734	27.4337	1	0.158	0.175355	0.571	2	-0.21	-0.193379	0.429	529
rs110917097	3	57937017	COL24A1	dpr	a	0.3627	22.7821	1	0.108	0.125599	0.703	2	-0.255	-0.237101	0.297	964
rs110251588	3	58008113	COL24A1	dpr	a	-0.405772	26.6764	2	0.11	0.127756	0.729	1	-0.296	-0.278016	0.271	570
rs110586820	3	58278370	COL24A1	dpr	a	-0.394589	23.3252	2	0.301	0.318843	0.237	1	-0.0936	-0.075746	0.763	897
rs134105357	3	58301032	COL24A1	dpr	a	0.365412	25.2329	1	0.232	0.252005	0.366	2	-0.134	-0.113407	0.634	683
rs41590493	3	58482880	ZNHIT6-CCN1	dpr	a	-0.434034	32.1396	2	0.129	0.148779	0.703	1	-0.305	-0.285255	0.297	289
rs110588479	3	60094119	PRKACB-TTLL7	dpr	a	0.398336	23.0446	1	0.0982	0.11159	0.753	2	-0.3	-0.286746	0.247	932
rs110534579	3	60406819	TTLL7(d)	dpr	a	0.375449	24.0022	1	0.266	0.283386	0.29	2	-0.109	-0.092063	0.71	812
rs109192269	3	60537914	TTLL7(d)	dpr	a	0.389696	28.0575	1	0.237	0.253933	0.392	2	-0.153	-0.135763	0.608	482
rs43708016	3	60541269	TTLL7(d)	dpr	a	0.382483	28.5631	1	0.233	0.252006	0.391	2	-0.149	-0.130477	0.609	446
rs41590507	3	60563205	TTLL7-ENSBTAG00000050554	dpr	a	0.400233	24.6189	1	0.294	0.309206	0.265	2	-0.106	-0.091027	0.735	758
rs136043728	3	60644014	TTLL7-ENSBTAG00000050554	dpr	a	0.376114	24.1853	1	0.111	0.128476	0.706	2	-0.265	-0.247637	0.294	793
rs110951076	3	62157969	ADGRL2(u)	dpr	a	0.396398	23.3272	1	0.0937	0.112006	0.764	2	-0.303	-0.284393	0.236	896
rs42482493	3	62505120	ADGRL2	dpr	a	-0.374342	25.9653	2	0.129	0.14728	0.656	1	-0.246	-0.227062	0.344	627
rs43342075	3	64020621	U6-ENSBTAG00000052602	dpr	a	0.409951	26.6268	1	0.303	0.322079	0.262	2	-0.107	-0.087872	0.738	572
rs137355872	4	78293492	C4H7orf25-ENSBTAG00000054524	dpr	a	0.359503	26.1904	1	0.172	0.184952	0.522	2	-0.188	-0.174551	0.478	608
rs110636208	4	83677944	5S-rRNA(u)	dpr	a	-0.391273	24.7805	2	0.106	0.123722	0.729	1	-0.285	-0.267551	0.271	745
rs134205142	4	85629921	CPED1	dpr	a	0.404707	25.0358	1	0.103	0.118401	0.746	2	-0.302	-0.286306	0.254	717
rs41654821	5	24815428	FGD6	dpr	a	-0.33595	22.5165	2	0.141	0.157355	0.581	1	-0.195	-0.178595	0.419	987
rs41255451	5	24939612	VEZT-MIR331	dpr	a	-0.351931	25.4612	2	0.165	0.182934	0.53	1	-0.187	-0.168996	0.47	667
rs3423192307	5	24973856	LOC112446660	dpr	a	-0.34414	24.0589	2	0.159	0.172948	0.537	1	-0.185	-0.171192	0.463	805
rs3423194192	5	25259925	ENSBTAG00000023670-ENSBTAG00000049405	dpr	a	-0.352506	23.9244	2	0.143	0.155656	0.594	1	-0.209	-0.19685	0.406	827
rs3423195046	5	25280151	ENSBTAG00000023670-ENSBTAG00000049405	dpr	a	-0.34923	23.0032	2	0.142	0.151875	0.593	1	-0.207	-0.197355	0.407	938
rs3423194412	5	25321725	ENSBTAG00000049405-ENSBTAG00000053336	dpr	a	0.349977	23.3822	1	0.142	0.152723	0.594	2	-0.208	-0.197254	0.406	891
rs109860940	5	25623553	GTSF1	dpr	a	-0.337424	23.2517	2	0.187	0.204836	0.445	1	-0.15	-0.132588	0.555	906
rs110719818	5	26323411	U6-CALCOCO1	dpr	a	0.374097	26.9355	1	0.146	0.164665	0.61	2	-0.228	-0.209431	0.39	562
rs136246450	5	26718100	MYG1	dpr	a	-0.372579	26.0843	2	0.142	0.162973	0.619	1	-0.231	-0.209606	0.381	620
rs110835860	5	26735252	ESPL1	dpr	a	-0.371133	25.8585	2	0.141	0.162145	0.62	1	-0.23	-0.208988	0.38	635
rs109961667	5	26920830	TNS2	dpr	a	0.370946	27.8005	1	0.161	0.178643	0.567	2	-0.21	-0.192303	0.433	496
rs110040689	5	27717436	KRT7-KRT80	dpr	a	0.36481	25.5361	1	0.224	0.244303	0.385	2	-0.141	-0.120507	0.615	659
rs110188230	5	28064960	SCN8A	dpr	a	0.370124	28.2584	1	0.191	0.208924	0.484	2	-0.179	-0.161199	0.516	466
rs110406190	5	28075511	SCN8A	dpr	a	0.371276	26.0974	1	0.235	0.257184	0.366	2	-0.136	-0.114092	0.634	616
rs110126851	5	28174375	SCN8A	dpr	a	-0.336663	23.5177	2	0.166	0.183863	0.507	1	-0.171	-0.1528	0.493	876
rs3423184092	5	28462959	CELA1	dpr	a	0.359714	24.7739	1	0.136	0.158714	0.621	2	-0.223	-0.201001	0.379	747
rs137107793	5	28970729	HIGD1C	dpr	a	0.379675	29.0163	1	0.168	0.185832	0.558	2	-0.212	-0.193843	0.442	417
rs109735242	5	29601113	FAM186A-U6	dpr	a	0.350992	25.1333	1	0.166	0.183119	0.527	2	-0.185	-0.167873	0.473	703
rs109880264	5	29791963	GPD1	dpr	a	0.368476	27.7366	1	0.198	0.215502	0.463	2	-0.17	-0.152973	0.537	502
rs110895644	5	29853345	RACGAP1	dpr	a	-0.352491	25.2592	2	0.187	0.203624	0.469	1	-0.165	-0.148866	0.531	681
rs109835954	5	29976434	AQP2-FAIM2	dpr	a	0.354877	25.8563	1	0.188	0.206007	0.469	2	-0.167	-0.14887	0.531	636
rs133044580	5	30309274	SPATS2	dpr	a	0.396507	32.0615	1	0.209	0.226739	0.472	2	-0.187	-0.169767	0.528	292
rs41656714	5	31079915	CCNT1	dpr	a	0.379682	29.6355	1	0.204	0.221223	0.464	2	-0.176	-0.158459	0.536	379
rs110740852	5	31275206	ENSBTAG00000051046	dpr	a	-0.353587	23.2645	2	0.121	0.139854	0.659	1	-0.233	-0.213732	0.341	905
rs137602015	5	32155036	PFKM	dpr	a	0.47409	29.3022	1	0.0941	0.112289	0.801	2	-0.38	-0.361801	0.199	394
rs110061997	5	32566772	ENDOU	dpr	a	0.403801	33.2284	1	0.182	0.198949	0.55	2	-0.222	-0.204853	0.45	259
rs109944529	5	32671712	LOC112446682	dpr	a	-0.464687	32.2509	2	0.114	0.133101	0.756	1	-0.351	-0.331586	0.244	287
rs42849312	5	32735476	RPAP3-ENSBTAG00000038027	dpr	a	0.48637	30.5829	1	0.0989	0.123255	0.797	2	-0.387	-0.363115	0.203	344
rs42843763	5	32741949	RPAP3-ENSBTAG00000038027	dpr	a	0.468411	38.3522	1	0.143	0.160507	0.694	2	-0.325	-0.307904	0.306	127
rs29024154	5	32758717	RPAP3-ENSBTAG00000038027	dpr	a	-0.464194	37.5675	2	0.141	0.159046	0.696	1	-0.323	-0.305148	0.304	142
rs136493100	5	32949636	ENSBTAG00000038027-PCED1B	dpr	a	0.39318	28.2447	1	0.254	0.279404	0.353	2	-0.139	-0.113776	0.647	467
rs43082562	5	33451948	SLC38A4	dpr	a	0.51476	51.441	1	0.22	0.245058	0.572	2	-0.295	-0.269702	0.428	26
rs110223230	5	33478596	SLC38A4	dpr	a	0.3869	26.8374	1	0.252	0.277193	0.349	2	-0.135	-0.109707	0.651	565
rs110641445	5	33495314	SLC38A4-ENSBTAG00000049143	dpr	a	0.461952	43.381	1	0.209	0.226699	0.547	2	-0.253	-0.235252	0.453	80
rs42358763	5	33503154	SLC38A4-ENSBTAG00000049143	dpr	a	-0.388014	28.0377	2	0.253	0.274117	0.347	1	-0.135	-0.113896	0.653	484
rs41595701	5	33560114	SLC38A4-ENSBTAG00000049143	dpr	a	0.357543	26.3214	1	0.191	0.209004	0.465	2	-0.166	-0.148539	0.535	598
rs110536598	5	33666514	SLC38A4-ENSBTAG00000049143	dpr	a	0.388117	29.6853	1	0.216	0.241226	0.444	2	-0.172	-0.146891	0.556	378
BovineHD0500009895	5	33720853	ENSBTAG00000049143	dpr	a	0.480778	45.6505	1	0.229	0.254119	0.523	2	-0.252	-0.226659	0.477	63
rs132710930	5	34764021	ARID2-ANO6	dpr	a	0.376193	28.0627	1	0.181	0.208425	0.519	2	-0.195	-0.167768	0.481	481
rs109303665	5	34774830	ARID2-ANO6	dpr	a	-0.376327	28.0895	2	0.181	0.208489	0.519	1	-0.195	-0.167838	0.481	479
rs137544348	5	34778058	ARID2-ANO6	dpr	a	-0.377291	28.2367	2	0.182	0.208969	0.518	1	-0.195	-0.168322	0.482	469
rs110237976	5	34782667	ARID2-ANO6	dpr	a	0.373086	27.6247	1	0.182	0.20911	0.512	2	-0.191	-0.163976	0.488	512
rs134243232	5	34784431	ARID2-ANO6	dpr	a	-0.36444	27.1105	2	0.177	0.2	0.513	1	-0.187	-0.16444	0.487	550
rs109662791	5	34828805	ARID2-ANO6	dpr	a	0.377987	28.4211	1	0.2	0.225179	0.471	2	-0.178	-0.152809	0.529	453
rs137148584	5	34883837	ANO6	dpr	a	-0.55879	37.8852	2	0.107	0.133681	0.809	1	-0.452	-0.425109	0.191	138
rs111013511	5	34894503	ANO6	dpr	a	0.367956	27.5736	1	0.164	0.182216	0.553	2	-0.203	-0.18574	0.447	517
rs133265941	5	35237422	ANO6-DBX2	dpr	a	0.436987	29.7763	1	0.112	0.132013	0.743	2	-0.325	-0.304974	0.257	374
rs133748361	5	35358732	DBX2-NELL2	dpr	a	0.584475	44.6845	1	0.116	0.133538	0.801	2	-0.468	-0.450937	0.199	67
rs109973209	5	35443801	NELL2	dpr	a	-0.336179	22.8235	2	0.187	0.205832	0.444	1	-0.149	-0.130347	0.556	959
rs3423092962	5	35508495	NELL2	dpr	a	0.354762	22.6363	1	0.114	0.131443	0.679	2	-0.241	-0.223318	0.321	979
rs135108696	5	35694391	NELL2	dpr	a	-0.346106	23.4641	2	0.138	0.155284	0.603	1	-0.209	-0.190822	0.397	883
rs109614062	5	36333541	TMEM117	dpr	a	0.383294	30.053	1	0.209	0.226812	0.454	2	-0.174	-0.156482	0.546	362
rs43435387	5	36439339	TMEM117	dpr	a	-0.363246	27.1476	2	0.173	0.191175	0.524	1	-0.191	-0.172071	0.476	546
rs41912766	5	37247097	LOC786089	dpr	a	0.386818	30.7248	1	0.184	0.201867	0.524	2	-0.203	-0.184951	0.476	339
rs42611064	5	40719223	LRRK2-SLC2A13	dpr	a	-0.385288	23.2454	2	0.0975	0.116052	0.747	1	-0.288	-0.269236	0.253	907
rs43440584	5	42830228	PTPRR	dpr	a	0.341539	22.7359	1	0.21	0.231421	0.386	2	-0.132	-0.110119	0.614	970
rs29003935	5	45568843	IL26-IFNG	dpr	a	0.386273	26.5634	1	0.263	0.279779	0.319	2	-0.123	-0.106495	0.681	579
rs108983417	5	45582721	IL26-IFNG	dpr	a	-0.395396	27.4218	2	0.269	0.286186	0.319	1	-0.126	-0.10921	0.681	530
rs110690046	5	48946156	WIF1-TBC1D30	dpr	a	-0.358326	22.4094	2	0.123	0.141628	0.658	1	-0.236	-0.216698	0.342	996
rs109474583	5	56494021	ENSBTAG00000050051	dpr	a	0.365351	25.4853	1	0.132	0.150243	0.638	2	-0.233	-0.215108	0.362	661
rs109559701	5	66632006	PAH	dpr	a	0.355406	25.0908	1	0.155	0.162649	0.563	2	-0.2	-0.192758	0.437	710
rs134452730	5	67279432	STAB2	dpr	a	-0.350485	25.2044	2	0.179	0.191648	0.489	1	-0.171	-0.158838	0.511	691
rs132792228	5	67630040	C5H12orf73	dpr	a	-0.397968	26.5916	2	0.119	0.13063	0.7	1	-0.279	-0.267338	0.3	577
rs110289384	5	67987383	TXNRD1-CHST11	dpr	a	-0.349579	24.2927	2	0.155	0.163744	0.556	1	-0.194	-0.185835	0.444	786
rs110696437	5	68121612	CHST11	dpr	a	0.397842	29.1078	1	0.135	0.153167	0.661	2	-0.263	-0.244674	0.339	409
rs109289741	5	68293598	CHST11	dpr	a	-0.368619	26.037	2	0.138	0.155331	0.625	1	-0.23	-0.213288	0.375	623
rs3423198064	5	68696282	WASHC4	dpr	a	0.460914	36.9793	1	0.15	0.160119	0.674	2	-0.311	-0.300795	0.326	158
rs109231721	5	68858474	ENSBTAG00000050973	dpr	a	-0.4264	32.0799	2	0.139	0.148958	0.673	1	-0.287	-0.277442	0.327	291
rs109752822	5	68867288	C5H12orf75	dpr	a	0.456984	36.4894	1	0.144	0.161867	0.686	2	-0.313	-0.295117	0.314	167
rs137574734	5	69405041	5S-rRNA-NUAK1	dpr	a	-0.452148	23.9132	2	0.373	0.385537	0.175	1	-0.079	-0.066611	0.825	829
rs134201089	5	69553651	NUAK1-CKAP4	dpr	a	0.334683	22.9822	1	0.174	0.189559	0.481	2	-0.161	-0.145124	0.519	944
rs135911373	5	70385614	CRY1-ENSBTAG00000001858	dpr	a	0.417679	31.5361	1	0.278	0.292293	0.334	2	-0.139	-0.125386	0.666	303
rs110176863	5	70556822	CRY1-ENSBTAG00000001858	dpr	a	0.370477	28.0372	1	0.191	0.205742	0.486	2	-0.18	-0.164734	0.514	485
rs109761207	5	70617660	BTBD11	dpr	a	-0.372522	26.6079	2	0.236	0.25295	0.366	1	-0.136	-0.119572	0.634	576
rs41621194	5	70623427	BTBD11	dpr	a	0.495812	25.1406	1	0.424	0.439765	0.145	2	-0.0721	-0.056046	0.855	702
rs109894310	5	70651696	BTBD11	dpr	a	0.369308	26.1694	1	0.234	0.250959	0.366	2	-0.135	-0.118349	0.634	610
rs109971012	5	70700083	BTBD11	dpr	a	0.359965	25.6784	1	0.213	0.230583	0.409	2	-0.147	-0.129382	0.591	648
rs109218398	5	70797526	BTBD11	dpr	a	0.399973	24.4615	1	0.301	0.317058	0.248	2	-0.0991	-0.082915	0.752	773
rs137429782	5	71008379	ASCL4	dpr	a	-0.400725	30.0236	2	0.147	0.160873	0.633	1	-0.253	-0.239852	0.367	365
rs109364543	5	71115803	FBXO7	dpr	a	-0.468916	26.305	2	0.387	0.401642	0.176	1	-0.0824	-0.067274	0.824	599
rs110166704	5	71126121	SYN3	dpr	a	0.350239	24.9186	1	0.193	0.210786	0.449	2	-0.157	-0.139454	0.551	727
rs109809437	5	71134951	SYN3	dpr	a	0.419898	27.3997	1	0.309	0.31943	0.263	2	-0.111	-0.100468	0.737	531
rs133281415	5	71142510	SYN3	dpr	a	-0.351977	25.1784	2	0.194	0.211866	0.449	1	-0.158	-0.140112	0.551	696
BTA-73902-no-rs	5	71176976	SYN3	dpr	a	0.385623	30.4579	1	0.188	0.203842	0.514	2	-0.198	-0.181781	0.486	350
rs109145027	5	71215860	SYN3	dpr	a	-0.405247	24.5091	2	0.307	0.318397	0.243	1	-0.0984	-0.08685	0.757	763
rs110232437	5	71280599	SYN3	dpr	a	0.395235	23.4145	1	0.298	0.314198	0.245	2	-0.0968	-0.081037	0.755	887
rs42793384	5	71377392	SYN3	dpr	a	-0.391309	26.9443	2	0.272	0.289395	0.306	1	-0.12	-0.101914	0.694	561
rs41648978	5	71694844	ENSBTAG00000050644-ENSBTAG00000030683	dpr	a	0.361606	23.0932	1	0.25	0.268097	0.308	2	-0.112	-0.093509	0.692	925
rs110813850	5	71914501	LARGE1	dpr	a	-0.347123	22.6816	2	0.226	0.24384	0.349	1	-0.121	-0.103284	0.651	974
rs109154635	5	72193524	LARGE1	dpr	a	-0.448402	40.5949	2	0.242	0.258884	0.46	1	-0.206	-0.189518	0.54	104
rs110355079	5	73204997	ISX(u)	dpr	a	-0.433099	37.6147	2	0.223	0.239079	0.486	1	-0.21	-0.19402	0.514	141
rs109503857	5	74236870	RBFOX2-ENSBTAG00000046392	dpr	a	0.362655	26.8269	1	0.178	0.195121	0.51	2	-0.185	-0.167534	0.49	566
rs136935959	5	74245072	RBFOX2-ENSBTAG00000046392	dpr	a	-0.392661	29.2242	2	0.245	0.258956	0.377	1	-0.148	-0.133705	0.623	400
rs110889714	5	74261181	LOC521214	dpr	a	-0.365504	27.2253	2	0.181	0.197583	0.504	1	-0.184	-0.167921	0.496	542
rs135533165	5	74390205	ENSBTAG00000055135-ENSBTAG00000053500	dpr	a	-0.384817	28.5644	2	0.235	0.248059	0.39	1	-0.15	-0.136757	0.61	444
rs133444626	5	74639822	ENSBTAG00000012192-APOL3	dpr	a	-0.349001	24.8521	2	0.172	0.188998	0.508	1	-0.177	-0.160003	0.492	734
rs110803736	5	74853402	MYH9-U6	dpr	a	0.464276	43.156	1	0.204	0.221476	0.56	2	-0.26	-0.242801	0.44	85
rs109175233	5	74987687	CACNG2	dpr	a	0.455575	34.9799	1	0.133	0.150635	0.708	2	-0.323	-0.30494	0.292	206
rs109100495	5	75184352	PVALB	dpr	a	-0.420829	33.7378	2	0.164	0.174024	0.611	1	-0.257	-0.246805	0.389	248
rs109916112	5	75224515	PVALB-NCF4	dpr	a	0.361656	26.0896	1	0.213	0.230876	0.411	2	-0.149	-0.13078	0.589	619
rs134396804	5	75246880	PVALB-NCF4	dpr	a	0.399853	27.7666	1	0.279	0.29611	0.303	2	-0.121	-0.103743	0.697	497
rs109891832	5	75251968	PVALB-NCF4	dpr	a	-0.361412	25.7976	2	0.217	0.234124	0.399	1	-0.144	-0.127288	0.601	639
rs134288153	5	75261435	PVALB-NCF4	dpr	a	0.412305	29.1407	1	0.286	0.29594	0.307	2	-0.127	-0.116365	0.693	407
rs133462101	5	75275309	NCF4	dpr	a	0.364469	26.972	1	0.203	0.220713	0.442	2	-0.161	-0.143756	0.558	559
rs135718502	5	75278600	NCF4	dpr	a	-0.402484	28.473	2	0.278	0.295791	0.309	1	-0.124	-0.106693	0.691	449
rs41663866	5	75309150	NCF4-CSF2RB	dpr	a	-0.399006	27.8095	2	0.276	0.289538	0.307	1	-0.123	-0.109467	0.693	495
rs110618422	5	75347213	NCF4-CSF2RB	dpr	a	-0.361888	26.5571	2	0.202	0.219492	0.442	1	-0.16	-0.142396	0.558	580
rs133910335	5	75355460	CSF2RB	dpr	a	0.40055	27.7564	1	0.277	0.29015	0.308	2	-0.123	-0.110399	0.692	499
rs137785235	5	75410757	ENSBTAG00000032114-TEX33	dpr	a	-0.352753	25.1493	2	0.198	0.212762	0.439	1	-0.155	-0.139991	0.561	701
rs3423199019	5	75414716	ENSBTAG00000032114-TEX33	dpr	a	0.392267	26.4664	1	0.273	0.285585	0.304	2	-0.119	-0.106682	0.696	588
rs3423201278	5	75436583	TST	dpr	a	-0.357888	25.5792	2	0.2	0.212593	0.44	1	-0.158	-0.145294	0.56	653
chr5_75993374	5	75617209	C1QTNF6	dpr	a	-0.378051	23.4037	2	0.274	0.291691	0.274	1	-0.104	-0.086361	0.726	889
rs110355206	5	75715294	CYTH4	dpr	a	-0.493348	39.239	2	0.135	0.151332	0.727	1	-0.358	-0.342016	0.273	118
rs133317002	5	76367511	SYT10	dpr	a	-0.442003	36.0101	2	0.158	0.169212	0.644	1	-0.284	-0.272791	0.356	180
rs43439753	5	76806262	SYT10-PKP2	dpr	a	-0.42486	34.5184	2	0.161	0.176418	0.62	1	-0.264	-0.248441	0.38	216
BTB-00232546	5	76942872	PKP2(u)	dpr	a	-0.426207	34.7282	2	0.158	0.176189	0.628	1	-0.268	-0.250018	0.372	210
rs134009403	5	77252112	FGD4	dpr	a	0.426348	29.2132	1	0.313	0.329972	0.267	2	-0.114	-0.096376	0.733	401
rs137597415	5	77254884	FGD4	dpr	a	-0.387891	27.5338	2	0.256	0.269384	0.341	1	-0.132	-0.118506	0.659	523
rs109118753	5	78228782	AMN1	dpr	a	-0.534312	53.0216	2	0.195	0.209997	0.635	1	-0.339	-0.324314	0.365	20
rs110147189	5	78338501	ETFBKMT-U6	dpr	a	-0.353208	24.7742	2	0.147	0.165072	0.584	1	-0.206	-0.188136	0.416	746
rs109040186	5	78423260	DENND5B	dpr	a	0.362517	25.0079	1	0.138	0.152222	0.618	2	-0.224	-0.210295	0.382	718
rs29016994	5	78510349	DENND5B	dpr	a	0.348722	24.1641	1	0.142	0.160047	0.592	2	-0.206	-0.188675	0.408	795
rs135076663	5	79695157	TMTC1(u)	dpr	a	0.389168	30.0386	1	0.162	0.17925	0.583	2	-0.227	-0.209919	0.417	363
rs110401873	5	79810464	TMTC1	dpr	a	-0.378146	27.6553	2	0.146	0.1637	0.614	1	-0.232	-0.214446	0.386	510
rs110045325	5	79910151	TMTC1	dpr	a	-0.473066	40.0031	2	0.159	0.174455	0.664	1	-0.314	-0.298611	0.336	111
rs109934936	5	80189414	LOC518980	dpr	a	0.440201	31.3347	1	0.121	0.137665	0.726	2	-0.319	-0.302536	0.274	311
rs134519027	5	80195322	LOC518980	dpr	a	0.419654	33.8667	1	0.172	0.186471	0.589	2	-0.247	-0.233183	0.411	243
rs41652632	5	80235852	ERGIC2	dpr	a	-0.396387	30.116	2	0.15	0.167801	0.621	1	-0.246	-0.228586	0.379	360
ARS-BFGL-NGS-37859	5	80281106	FAR2	dpr	a	0.442761	32.0246	1	0.124	0.142636	0.72	2	-0.319	-0.300126	0.28	293
rs136602188	5	80578431	FAR2(d)	dpr	a	0.361735	24.9959	1	0.14	0.154893	0.612	2	-0.221	-0.206842	0.388	720
rs109769851	5	80626601	FAR2(d)	dpr	a	0.369438	26.4704	1	0.141	0.158318	0.617	2	-0.228	-0.21112	0.383	587
rs109178000	5	80652213	FAR2(d)	dpr	a	0.373997	28.3597	1	0.187	0.203695	0.5	2	-0.187	-0.170303	0.5	461
rs110296781	5	80936393	CCDC91(u)	dpr	a	0.343656	23.4716	1	0.147	0.161357	0.572	2	-0.197	-0.182299	0.428	880
rs29023629	5	80957424	CCDC91(u)	dpr	a	0.450091	34.73	1	0.135	0.153708	0.699	2	-0.315	-0.296382	0.301	209
rs109407609	5	81116016	CCDC91(u)	dpr	a	-0.448181	36.2748	2	0.148	0.166206	0.669	1	-0.3	-0.281975	0.331	174
rs110375457	5	81636788	CCDC91-PTHLH	dpr	a	-0.340361	23.2409	2	0.199	0.216413	0.415	1	-0.141	-0.123949	0.585	908
rs109588170	5	81688639	CCDC91-PTHLH	dpr	a	0.379443	29.1234	1	0.202	0.220548	0.468	2	-0.177	-0.158894	0.532	408
rs109131039	5	82108261	MRPS35	dpr	a	0.369989	23.6008	1	0.111	0.127679	0.699	2	-0.259	-0.242309	0.301	871
rs41572869	5	82333451	PPFIBP1	dpr	a	-0.412796	34.2006	2	0.179	0.192858	0.567	1	-0.234	-0.219938	0.433	230
rs41591894	5	83132519	ITPR2	dpr	a	-0.360092	24.1772	2	0.125	0.143178	0.652	1	-0.235	-0.216914	0.348	794
rs110385014	5	83156244	ITPR2	dpr	a	0.36461	24.9683	1	0.159	0.172306	0.563	2	-0.205	-0.192303	0.437	722
rs43745960	5	83283306	ITPR2	dpr	a	0.37619	28.3044	1	0.213	0.229203	0.435	2	-0.164	-0.146987	0.565	465
rs109818043	5	84103522	ENSBTAG00000053615	dpr	a	0.418218	34.159	1	0.211	0.220287	0.495	2	-0.207	-0.197932	0.505	231
rs110944449	5	84524072	LMNTD1-ENSBTAG00000055210	dpr	a	-0.564301	33.7598	2	0.0876	0.104345	0.845	1	-0.477	-0.459957	0.155	246
rs41616137	5	84547721	LMNTD1-ENSBTAG00000055210	dpr	a	0.611793	40.693	1	0.0976	0.115272	0.841	2	-0.514	-0.496521	0.159	103
rs111009565	5	84638958	ENSBTAG00000050678-KRAS	dpr	a	-0.372057	28.4084	2	0.18	0.196435	0.518	1	-0.193	-0.175622	0.482	454
rs136086227	5	84643734	ENSBTAG00000050678-KRAS	dpr	a	0.757184	43.8852	1	0.0807	0.100345	0.893	2	-0.676	-0.65684	0.107	74
rs41652689	5	85151402	BCAT1	dpr	a	0.375427	28.43	1	0.209	0.22658	0.444	2	-0.167	-0.148847	0.556	451
rs133407982	5	86824735	SOX5(d)	dpr	a	-0.476681	28.6817	2	0.0924	0.109136	0.806	1	-0.384	-0.367545	0.194	437
rs29012671	5	86885348	SOX5(d)	dpr	a	0.360669	26.3358	1	0.169	0.181611	0.533	2	-0.192	-0.179058	0.467	597
rs132910912	5	86893188	SOX5(d)	dpr	a	0.413602	26.6141	1	0.107	0.124225	0.742	2	-0.307	-0.289377	0.258	574
rs109593099	5	86982599	SOX5(d)	dpr	a	-0.354711	24.1307	2	0.133	0.149479	0.625	1	-0.222	-0.205232	0.375	797
rs42976400	5	87028368	SOX5(d)	dpr	a	0.429176	26.2577	1	0.0967	0.114097	0.775	2	-0.333	-0.315079	0.225	602
rs43439728	5	87463518	ETNK1(u)	dpr	a	0.370716	23.1493	1	0.106	0.123731	0.715	2	-0.265	-0.246985	0.285	919
rs133264765	5	87527600	ETNK1(u)	dpr	a	0.696066	38.136	1	0.0763	0.09367	0.89	2	-0.62	-0.602396	0.11	135
rs43708406	5	87697736	C2CD5	dpr	a	0.696565	38.3351	1	0.0763	0.091675	0.89	2	-0.62	-0.60489	0.11	129
rs134228522	5	87932859	ST8SIA1	dpr	a	0.572203	36.6591	1	0.103	0.112816	0.821	2	-0.47	-0.459387	0.179	165
rs137830740	5	87977330	ST8SIA1	dpr	a	0.405168	33.1796	1	0.217	0.233709	0.464	2	-0.188	-0.171459	0.536	260
rs110744833	5	88002628	ST8SIA1	dpr	a	0.415774	33.9003	1	0.247	0.265065	0.405	2	-0.168	-0.150709	0.595	239
rs41594003	5	88025709	ST8SIA1	dpr	a	0.479149	46.3013	1	0.247	0.265026	0.484	2	-0.232	-0.214124	0.516	60
rs42718234	5	88267557	ABCC9	dpr	a	0.442371	33.6723	1	0.309	0.327076	0.302	2	-0.134	-0.115295	0.698	250
rs42718239	5	88271840	ABCC9	dpr	a	0.468409	39.9731	1	0.309	0.326741	0.341	2	-0.16	-0.141668	0.659	112
rs42406616	5	88287852	ABCC9	dpr	a	0.613438	43.1997	1	0.104	0.121999	0.83	2	-0.509	-0.49144	0.17	83
rs42405458	5	88360524	ABCC9	dpr	a	-0.38292	28.8417	2	0.151	0.168966	0.606	1	-0.232	-0.213954	0.394	426
rs109795387	5	88379767	ABCC9	dpr	a	0.439776	37.1587	1	0.181	0.198054	0.588	2	-0.258	-0.241722	0.412	150
rs209567919	5	88442763	KCNJ8-LDHB	dpr	a	-0.571395	47.9098	2	0.138	0.155735	0.758	1	-0.433	-0.41566	0.242	44
rs42396867	5	89004550	SLCO1B3-SLCO1C1	dpr	a	-0.673742	33.6128	2	0.0686	0.086718	0.898	1	-0.605	-0.587024	0.102	253
rs41584068	5	89972770	ENSBTAG00000050454-5S-rRNA	dpr	a	0.414054	26.4013	1	0.311	0.329722	0.25	2	-0.103	-0.084331	0.75	594
rs109630468	5	90009516	5S-rRNA-ENSBTAG00000054482	dpr	a	-0.43019	25.9187	2	0.337	0.354502	0.217	1	-0.0935	-0.075687	0.783	631
rs110753663	5	90058869	5S-rRNA-ENSBTAG00000054482	dpr	a	-0.403531	23.464	2	0.312	0.32945	0.227	1	-0.0917	-0.074082	0.773	884
rs109373447	5	90664868	PLEKHA5	dpr	a	-0.423628	28.686	2	0.121	0.137819	0.715	1	-0.303	-0.285809	0.285	436
rs110966220	5	90667044	PLEKHA5	dpr	a	-0.460796	27.3372	2	0.0908	0.109359	0.803	1	-0.37	-0.351437	0.197	535
rs133038904	5	90669576	PLEKHA5	dpr	a	0.423754	28.6676	1	0.121	0.137711	0.715	2	-0.303	-0.286043	0.285	438
rs110449275	5	90683163	PLEKHA5	dpr	a	-0.403295	25.1233	2	0.105	0.125274	0.739	1	-0.298	-0.278021	0.261	705
rs135518292	5	91048519	PLEKHA5-CAPZA3	dpr	a	-0.458659	30.3398	2	0.105	0.1228	0.772	1	-0.354	-0.335859	0.228	353
rs109258879	5	91118857	PLEKHA5-CAPZA3	dpr	a	0.572593	36.5429	1	0.0941	0.112653	0.836	2	-0.479	-0.45994	0.164	166
rs41618799	5	91196362	PLEKHA5-CAPZA3	dpr	a	-0.357436	24.3826	2	0.226	0.243583	0.369	1	-0.132	-0.113854	0.631	778
rs110068335	5	91393516	PLCZ1-PIK3C2G	dpr	a	-0.355261	22.6358	2	0.114	0.131985	0.679	1	-0.241	-0.223276	0.321	980
rs137679477	5	91807182	PIK3C2G	dpr	a	-0.403208	27.128	2	0.12	0.135076	0.702	1	-0.283	-0.268132	0.298	549
rs41579566	5	92415826	5S-rRNA(d)	dpr	a	0.410731	24.3441	1	0.0942	0.112219	0.771	2	-0.317	-0.298512	0.229	784
rs43708432	5	92527188	5S-rRNA(d)	dpr	a	-0.409654	22.7332	2	0.0858	0.103204	0.79	1	-0.324	-0.30645	0.21	971
rs134560532	5	92922775	LMO3(u)	dpr	a	0.463044	27.1469	1	0.0893	0.106991	0.807	2	-0.374	-0.356053	0.193	547
rs133576834	5	93369146	LMO3-MGST1	dpr	a	0.400327	29.1072	1	0.144	0.161999	0.641	2	-0.257	-0.238328	0.359	410
rs137705840	5	93517967	MGST1	dpr	a	-0.533627	22.7028	2	0.0601	0.082397	0.887	1	-0.473	-0.45123	0.113	972
rs110224694	5	95064361	MGP-ART4	dpr	a	-0.379661	29.4264	2	0.199	0.216609	0.477	1	-0.181	-0.163053	0.523	389
rs3423206804	5	103673698	ENSBTAG00000051680	dpr	a	0.372032	25.0412	1	0.251	0.268867	0.325	2	-0.121	-0.103164	0.675	715
rs110527343	6	12523570	ANK2	dpr	a	-0.412461	25.3877	2	0.0984	0.11867	0.761	1	-0.314	-0.293791	0.239	673
rs29025709	6	44710515	SEPSECS	dpr	a	0.330666	22.4253	1	0.181	0.198969	0.452	2	-0.149	-0.131697	0.548	994
rs109041887	6	46751512	STIM2-ENSBTAG00000018885	dpr	a	-0.350897	24.8542	2	0.151	0.168404	0.571	1	-0.2	-0.182493	0.429	733
rs29010402	6	47256173	ENSBTAG00000018885(d)	dpr	a	0.343079	23.9026	1	0.151	0.16869	0.561	2	-0.193	-0.17439	0.439	831
rs3423216104	6	48270728	5S-rRNA(u)	dpr	a	-0.374946	25.7031	2	0.249	0.269935	0.335	1	-0.126	-0.105011	0.665	647
rs134277974	6	58383376	WDR19	dpr	a	-0.372184	24.9651	2	0.245	0.257921	0.341	1	-0.127	-0.114262	0.659	723
rs135061517	6	59957189	APBB2	dpr	a	-0.350471	23.6476	2	0.139	0.159695	0.604	1	-0.212	-0.190776	0.396	865
rs42371092	6	61697427	GRXCR1	dpr	a	-0.339724	23.2943	2	0.193	0.210458	0.432	1	-0.147	-0.129266	0.568	900
rs109706578	6	67835794	DCUN1D4-LRRC66	dpr	a	-0.40081	28.5037	2	0.274	0.290526	0.315	1	-0.126	-0.110284	0.685	448
rs109581649	6	67864807	LRRC66	dpr	a	0.340185	23.0363	1	0.142	0.157806	0.583	2	-0.198	-0.182379	0.417	933
rs136549293	6	67914420	SGCB-SPATA18	dpr	a	0.402367	27.7036	1	0.28	0.292911	0.304	2	-0.122	-0.109456	0.696	507
rs110490856	6	69291161	LNX1-ENSBTAG00000004082	dpr	a	-0.416559	31.3818	2	0.138	0.155434	0.668	1	-0.278	-0.261125	0.332	308
rs109601840	6	71077325	LOC107132570	dpr	a	-0.372651	27.5598	2	0.152	0.169533	0.593	1	-0.221	-0.203119	0.407	519
rs133168807	6	80689501	EPHA5(u)	dpr	a	0.43554	38.6305	1	0.234	0.251017	0.463	2	-0.201	-0.184522	0.537	124
rs41654981	6	80817275	EPHA5(u)	dpr	a	-0.436009	31.8588	2	0.311	0.327976	0.288	1	-0.125	-0.108033	0.712	298
rs110611265	6	80956681	EPHA5	dpr	a	-0.392151	26.5123	2	0.274	0.291285	0.301	1	-0.118	-0.100867	0.699	582
rs109432679	6	81676280	ENSBTAG00000052362(d)	dpr	a	0.406794	33.6532	1	0.188	0.204906	0.539	2	-0.219	-0.201889	0.461	251
rs110257792	6	81683887	ENSBTAG00000052362(d)	dpr	a	-0.404971	33.3701	2	0.187	0.204479	0.538	1	-0.218	-0.200492	0.462	258
rs3423228230	6	82051224	ENSBTAG00000052362(d)	dpr	a	-0.424306	33.451	2	0.272	0.289486	0.359	1	-0.152	-0.13482	0.641	256
rs3423228144	6	82180121	blank	dpr	a	-0.344745	22.7917	2	0.127	0.143355	0.63	1	-0.217	-0.20139	0.37	963
rs3423221808	6	82206440	blank	dpr	a	-0.419732	30.5283	2	0.139	0.158716	0.669	1	-0.281	-0.261016	0.331	348
rs207600273	6	82257048	blank	dpr	a	-0.429273	37.0878	2	0.187	0.204165	0.563	1	-0.242	-0.225108	0.437	152
rs211141685	6	82283005	blank	dpr	a	-0.412126	34.2579	2	0.191	0.210622	0.536	1	-0.221	-0.201504	0.464	227
rs135432960	6	82582052	blank	dpr	a	0.343633	24.0156	1	0.182	0.202154	0.471	2	-0.162	-0.141478	0.529	808
rs109036919	6	82600802	blank	dpr	a	-0.499583	48.6189	2	0.298	0.317176	0.404	1	-0.202	-0.182407	0.596	38
rs29012417	6	82628692	blank	dpr	a	-0.445035	38.7216	2	0.27	0.288013	0.393	1	-0.175	-0.157023	0.607	123
rs41600541	6	82724369	CENPC(u)	dpr	a	0.343415	22.6518	1	0.216	0.232356	0.372	2	-0.128	-0.111058	0.628	978
rs110435921	6	82783932	CENPC(u)	dpr	a	-0.350929	25.2133	2	0.189	0.20659	0.461	1	-0.162	-0.144339	0.539	690
rs136618695	6	82815622	CENPC(u)	dpr	a	-0.359301	26.4986	2	0.18	0.195884	0.499	1	-0.179	-0.163416	0.501	585
rs137352335	6	82910076	CENPC(u)	dpr	a	-0.352196	23.7073	2	0.224	0.241379	0.364	1	-0.128	-0.110817	0.636	859
rs133054050	6	82954099	CENPC(u)	dpr	a	-0.341107	23.2259	2	0.199	0.213779	0.417	1	-0.142	-0.127328	0.583	910
rs109825631	6	82992397	CENPC(u)	dpr	a	-0.353004	25.6461	2	0.179	0.196623	0.493	1	-0.174	-0.156381	0.507	649
rs110800062	6	83444767	GNRHR	dpr	a	0.482572	44.174	1	0.193	0.209126	0.6	2	-0.29	-0.273446	0.4	70
rs29001782	6	83456813	ENSBTAG00000038648	dpr	a	0.47539	44.4523	1	0.19	0.207934	0.6	2	-0.285	-0.267456	0.4	68
rs136212327	6	83470850	ENSBTAG00000038648	dpr	a	0.477595	43.783	1	0.191	0.205382	0.599	2	-0.286	-0.272213	0.401	76
rs110289032	6	85067620	ENSBTAG00000015047-UGT2A1	dpr	a	-0.450308	40.4353	2	0.185	0.20266	0.589	1	-0.265	-0.247648	0.411	105
rs109984047	6	85110288	UGT2A1	dpr	a	0.429469	34.0807	1	0.265	0.282639	0.382	2	-0.164	-0.14683	0.618	234
rs132959157	6	85115522	UGT2A1	dpr	a	-0.458459	40.8614	2	0.188	0.204507	0.589	1	-0.27	-0.253952	0.411	102
rs3423223703	6	85144158	UGT2A1-SULT1B1	dpr	a	-0.507283	47.6948	2	0.186	0.199594	0.634	1	-0.322	-0.307689	0.366	45
rs135052123	6	85312679	SULT1E1	dpr	a	-0.477245	35.3538	2	0.123	0.141983	0.742	1	-0.354	-0.335262	0.258	194
rs110914422	6	85446151	CSN1S1-CSN2	dpr	a	0.3753	24.7981	1	0.117	0.134461	0.688	2	-0.258	-0.240839	0.312	741
rs109248332	6	85536862	CSN1S2	dpr	a	0.454235	26.262	1	0.365	0.383065	0.196	2	-0.0889	-0.071171	0.804	601
rs133112151	6	85617846	ODAM-CSN3	dpr	a	0.514528	49.2894	1	0.328	0.346331	0.363	2	-0.187	-0.168197	0.637	36
rs43703015	6	85656736	CSN3	dpr	a	-0.445366	37.0117	2	0.285	0.305314	0.359	1	-0.16	-0.140051	0.641	157
rs43703016	6	85656772	CSN3	dpr	a	0.444928	37.2743	1	0.285	0.30272	0.359	2	-0.16	-0.142208	0.641	149
rs3423226650	6	85656834	CSN3	dpr	a	0.445377	37.0168	1	0.285	0.304029	0.36	2	-0.16	-0.141349	0.64	156
rs29024684	6	85662466	CSN3-ENSBTAG00000049824	dpr	a	0.445846	37.522	1	0.286	0.303768	0.359	2	-0.16	-0.142079	0.641	143
rs110312754	6	85686637	ENSBTAG00000049824-CABS1	dpr	a	0.482568	45.3542	1	0.292	0.312304	0.394	2	-0.19	-0.170264	0.606	65
rs110270703	6	85844689	ENSBTAG00000007816-ENSBTAG00000048522	dpr	a	-0.44034	37.4822	2	0.168	0.188643	0.618	1	-0.272	-0.251697	0.382	144
rs109377247	6	85896097	LOC100848253	dpr	a	0.501584	51.4336	1	0.252	0.270094	0.497	2	-0.249	-0.23149	0.503	28
rs109287020	6	85918679	LOC112447096	dpr	a	-0.56666	50.6561	2	0.408	0.426902	0.279	1	-0.158	-0.139758	0.721	30
rs110125983	6	85929213	LOC112447096	dpr	a	-0.46964	40.9249	2	0.295	0.315315	0.372	1	-0.175	-0.154325	0.628	98
rs41567942	6	85989376	AMBN-ENAM	dpr	a	-0.340917	23.7112	2	0.161	0.179015	0.527	1	-0.18	-0.161902	0.473	858
rs137439073	6	86371461	LOC112447099	dpr	a	-0.50586	27.7526	2	0.0804	0.09843	0.841	1	-0.426	-0.40743	0.159	500
rs110354582	6	86378938	LOC112447099	dpr	a	0.650255	24.7832	1	0.0501	0.070397	0.923	2	-0.6	-0.579857	0.0771	744
rs137302420	6	86751807	SLC4A4	dpr	a	0.490633	47.1825	1	0.224	0.241608	0.544	2	-0.267	-0.249026	0.456	50
rs109512265	6	86753255	SLC4A4	dpr	a	-0.488169	46.7461	2	0.223	0.239571	0.544	1	-0.266	-0.248599	0.456	57
rs110953922	6	86755896	SLC4A4	dpr	a	-0.489453	46.9923	2	0.223	0.241513	0.544	1	-0.266	-0.24794	0.456	53
rs109901151	6	86762457	SLC4A4	dpr	a	-0.488018	48.2677	2	0.222	0.240607	0.545	1	-0.266	-0.247411	0.455	41
rs137664040	6	86795926	SLC4A4	dpr	a	-0.560231	60.8581	2	0.236	0.258219	0.578	1	-0.324	-0.302012	0.422	11
rs110527224	6	86860291	SLC4A4-GC	dpr	a	-0.687463	87.0001	2	0.241	0.258647	0.65	1	-0.447	-0.428816	0.35	4
rs110380398	6	86877334	SLC4A4-GC	dpr	a	0.690375	87.1596	1	0.242	0.26039	0.65	2	-0.448	-0.429985	0.35	3
rs132726233	6	86891428	SLC4A4-GC	dpr	a	-0.411275	33.0105	2	0.224	0.24237	0.456	1	-0.187	-0.168905	0.544	266
rs43338539	6	86924174	SLC4A4-GC	dpr	a	0.564886	60.6331	1	0.355	0.373235	0.371	2	-0.21	-0.191651	0.629	13
rs134342291	6	86964714	GC	dpr	a	0.607042	62.522	1	0.425	0.443704	0.3	2	-0.182	-0.163339	0.7	9
rs109452259	6	87068809	GC-NPFFR2	dpr	a	0.589733	69.4518	1	0.251	0.269899	0.574	2	-0.338	-0.319835	0.426	6
rs42767507	6	87101644	GC-NPFFR2	dpr	a	-0.587028	66.8108	2	0.351	0.368902	0.402	1	-0.236	-0.218126	0.598	7
rs137147462	6	87153414	GC-NPFFR2	dpr	a	-0.653295	85.1188	2	0.301	0.320016	0.54	1	-0.353	-0.333279	0.46	5
rs42766480	6	87156735	GC-NPFFR2	dpr	a	0.526271	56.2321	1	0.273	0.290927	0.481	2	-0.253	-0.235343	0.519	17
rs110434046	6	87184768	GC-NPFFR2	dpr	a	-0.713785	95.0589	2	0.26	0.277791	0.636	1	-0.454	-0.435994	0.364	1
rs110352004	6	87213962	GC-NPFFR2	dpr	a	-0.500457	50.4697	2	0.227	0.244837	0.547	1	-0.274	-0.255621	0.453	31
rs137844449	6	87315748	NPFFR2	dpr	a	-0.411915	32.2618	2	0.258	0.278462	0.375	1	-0.154	-0.133454	0.625	286
rs109034709	6	87316810	NPFFR2	dpr	a	-0.710585	94.2669	2	0.258	0.277768	0.636	1	-0.452	-0.432816	0.364	2
rs110694875	6	87405290	NPFFR2-ADAMTS3	dpr	a	0.486169	48.2204	1	0.228	0.245775	0.531	2	-0.258	-0.240394	0.469	42
rs109793149	6	88808252	ENSBTAG00000052772-CXCL8	dpr	a	0.490684	24.072	1	0.0699	0.088315	0.858	2	-0.421	-0.40237	0.142	802
rs41654951	6	89115789	MTHFD2L	dpr	a	-0.461749	40.3328	2	0.294	0.312633	0.363	1	-0.168	-0.149116	0.637	107
rs109654183	6	89237612	MTHFD2L	dpr	a	-0.520394	48.2757	2	0.173	0.188074	0.667	1	-0.347	-0.33232	0.333	40
rs136378312	6	89264599	LOC104968898	dpr	a	-0.51255	47.4336	2	0.171	0.189272	0.666	1	-0.342	-0.323278	0.334	47
rs109685843	6	89408744	AREG-BTC	dpr	a	0.370017	25.5302	1	0.234	0.248948	0.369	2	-0.136	-0.121069	0.631	660
rs111026799	6	89642507	AREG-BTC	dpr	a	0.439597	38.3414	1	0.184	0.201105	0.581	2	-0.255	-0.238492	0.419	128
rs42607539	6	89695966	BTC	dpr	a	0.514128	47.3942	1	0.171	0.187832	0.667	2	-0.343	-0.326296	0.333	48
rs42773532	6	89736709	BTC-PARM1	dpr	a	-0.512979	48.0531	2	0.173	0.190904	0.662	1	-0.34	-0.322075	0.338	43
rs135511775	6	89903007	PARM1	dpr	a	0.669304	47.036	1	0.103	0.118146	0.846	2	-0.566	-0.551159	0.154	51
rs110488474	6	90663381	USO1-U1	dpr	a	0.486538	35.59	1	0.117	0.134477	0.76	2	-0.37	-0.352062	0.24	186
rs134099096	6	90777275	NAAA	dpr	a	0.420561	29.5411	1	0.121	0.129508	0.711	2	-0.299	-0.291052	0.289	383
rs43477009	6	90821649	SDAD1	dpr	a	-0.522133	51.8399	2	0.203	0.211227	0.612	1	-0.319	-0.310906	0.388	25
rs43476286	6	90847159	SDAD1-CXCL9	dpr	a	0.523019	52.0137	1	0.203	0.211196	0.612	2	-0.32	-0.311822	0.388	23
rs132691482	6	91123141	SCARB2	dpr	a	-0.364902	23.7489	2	0.117	0.126387	0.678	1	-0.247	-0.238515	0.322	852
rs43473446	6	91348077	SHROOM3	dpr	a	0.377123	24.3946	1	0.261	0.2695	0.307	2	-0.116	-0.107623	0.693	776
rs132964769	6	91397116	SHROOM3	dpr	a	-0.374431	28.2293	2	0.192	0.200567	0.486	1	-0.182	-0.173864	0.514	470
rs110666131	6	91433201	SHROOM3	dpr	a	-0.404786	22.5844	2	0.0882	0.097858	0.782	1	-0.317	-0.306928	0.218	983
rs109817875	6	91713866	SHROOM3-SOWAHB	dpr	a	-0.376086	28.378	2	0.215	0.226864	0.428	1	-0.161	-0.149222	0.572	458
rs41655345	6	91800062	SEPTIN11	dpr	a	-0.374866	27.1341	2	0.235	0.252899	0.373	1	-0.14	-0.121967	0.627	548
rs135059678	6	92152596	CCNG2-ENSBTAG00000048934	dpr	a	-0.341259	23.4892	2	0.186	0.196623	0.454	1	-0.155	-0.144636	0.546	879
rs41629192	6	92180352	CCNG2-ENSBTAG00000048934	dpr	a	0.385889	29.2704	1	0.15	0.168017	0.61	2	-0.235	-0.217872	0.39	398
rs43479297	6	92318177	CXCL13-CNOT6L	dpr	a	0.478845	29.7689	1	0.384	0.400778	0.198	2	-0.0948	-0.078068	0.802	375
rs110745824	6	92331782	CXCL13-CNOT6L	dpr	a	-0.41494	31.6416	2	0.271	0.283403	0.346	1	-0.144	-0.131537	0.654	302
rs137545431	6	92370834	CXCL13-CNOT6L	dpr	a	0.400417	32.6262	1	0.213	0.226096	0.468	2	-0.187	-0.174321	0.532	277
rs109584651	6	93061888	FRAS1	dpr	a	0.336269	23	1	0.147	0.16468	0.564	2	-0.19	-0.171588	0.436	939
rs109210714	6	93415037	ANXA3-ENSBTAG00000050428	dpr	a	-0.360459	26.59	2	0.165	0.182732	0.542	1	-0.195	-0.177728	0.458	578
rs43726900	6	93663972	PAQR3	dpr	a	-0.348301	23.265	2	0.219	0.236904	0.371	1	-0.129	-0.111397	0.629	904
rs41604697	6	93832672	PAQR3-NAA11	dpr	a	-0.467074	41.3429	2	0.171	0.188744	0.634	1	-0.296	-0.27833	0.366	95
rs109632354	6	93937667	PAQR3-NAA11	dpr	a	0.380238	28.3687	1	0.199	0.207822	0.475	2	-0.181	-0.172416	0.525	460
rs43478516	6	93960120	PAQR3-NAA11	dpr	a	0.408724	30.2591	1	0.26	0.268886	0.365	2	-0.149	-0.139839	0.635	356
rs43478508	6	93977667	PAQR3-NAA11	dpr	a	0.408795	30.2761	1	0.26	0.2689	0.365	2	-0.149	-0.139895	0.635	355
rs110769232	6	94117930	GK2-ENSBTAG00000032979	dpr	a	0.33003	22.4283	1	0.172	0.190064	0.477	2	-0.158	-0.139967	0.523	993
rs109636666	6	94124546	GK2-ENSBTAG00000032979	dpr	a	-0.530017	36.3259	2	0.114	0.127982	0.784	1	-0.416	-0.402035	0.216	173
rs43560689	8	70559619	ENTPD4	dpr	a	-0.364827	25.9811	2	0.224	0.240859	0.387	1	-0.141	-0.123968	0.613	625
rs43571286	8	78118013	NTRK2	dpr	a	0.489455	23.8046	1	0.0682	0.085846	0.861	2	-0.421	-0.403609	0.139	845
rs109622870	8	80869483	DAPK1	dpr	a	-0.403596	25.3854	2	0.109	0.128824	0.73	1	-0.295	-0.274773	0.27	674
rs41255156	8	80980150	CTSL	dpr	a	-0.431006	28.7703	2	0.109	0.124323	0.748	1	-0.322	-0.306683	0.252	430
rs379236718	8	81085852	FBP1	dpr	a	0.546604	28.3559	1	0.0727	0.089671	0.867	2	-0.474	-0.456933	0.133	462
rs43734710	8	82161159	PTCH1	dpr	a	0.526811	27.2592	1	0.0772	0.099389	0.853	2	-0.45	-0.427422	0.147	540
rs3423259378	8	82565325	ERCC6L2	dpr	a	-0.402889	31.0152	2	0.159	0.177578	0.606	1	-0.244	-0.225311	0.394	326
rs42552675	8	82756766	ERCC6L2-ENSBTAG00000053599	dpr	a	-0.397699	28.9379	2	0.132	0.149934	0.668	1	-0.266	-0.247765	0.332	422
rs137341434	8	82787089	ERCC6L2-ENSBTAG00000053599	dpr	a	0.615417	33.8856	1	0.0767	0.094004	0.875	2	-0.539	-0.521413	0.125	240
rs136350888	8	82955370	ENSBTAG00000053599-HSD17B3	dpr	a	0.658894	36.1736	1	0.0798	0.097789	0.879	2	-0.579	-0.561105	0.121	176
rs110930185	8	83051775	SLC35D2	dpr	a	0.356547	22.871	1	0.239	0.257181	0.328	2	-0.117	-0.099366	0.672	952
rs43566450	8	83217737	CDC14B	dpr	a	0.42323	34.2541	1	0.156	0.173068	0.632	2	-0.267	-0.250162	0.368	228
rs43566452	8	83220088	CDC14B	dpr	a	0.455536	24.7292	1	0.0845	0.104723	0.815	2	-0.371	-0.350814	0.185	755
rs110734007	8	83221868	CDC14B	dpr	a	0.367108	27.7482	1	0.184	0.200456	0.499	2	-0.183	-0.166652	0.501	501
rs137182288	8	83255785	CDC14B	dpr	a	0.37054	26.9588	1	0.184	0.203257	0.502	2	-0.186	-0.167284	0.498	560
rs41658946	8	83358562	CDC14B-PRXL2C	dpr	a	-0.399859	30.9996	2	0.153	0.170449	0.617	1	-0.247	-0.229409	0.383	328
rs43574244	8	83375649	CDC14B-PRXL2C	dpr	a	-0.395215	24.4981	2	0.101	0.118808	0.745	1	-0.295	-0.276406	0.255	767
rs43568461	8	83687485	U6-ENSBTAG00000009764	dpr	a	-0.514768	29.7872	2	0.0848	0.103745	0.835	1	-0.43	-0.411022	0.165	372
rs382177617	8	83727039	ENSBTAG00000009764	dpr	a	-0.627071	34.4347	2	0.0761	0.093782	0.879	1	-0.551	-0.533289	0.121	219
rs380408824	8	83729214	ENSBTAG00000009764	dpr	a	0.641721	34.3206	1	0.0735	0.091407	0.885	2	-0.568	-0.550314	0.115	221
rs43574629	8	84045184	CENPP-OMD	dpr	a	0.432865	33.7552	1	0.142	0.158476	0.673	2	-0.291	-0.274389	0.327	247
rs41587051	8	84050346	CENPP-OMD	dpr	a	0.663788	37.0299	1	0.0775	0.098602	0.883	2	-0.586	-0.565186	0.117	155
rs110752781	8	84212707	IPPK	dpr	a	0.661339	36.7065	1	0.0771	0.0962	0.883	2	-0.584	-0.565139	0.117	163
rs42737642	8	84297085	BICD2	dpr	a	0.637131	35.0606	1	0.0763	0.094603	0.88	2	-0.561	-0.542528	0.12	201
rs41594926	8	84402125	FGD3	dpr	a	0.655658	36.8879	1	0.0784	0.097405	0.88	2	-0.577	-0.558253	0.12	159
rs41593792	8	84472391	SUSD3-CARD19	dpr	a	0.568852	31.0026	1	0.0774	0.097079	0.864	2	-0.491	-0.471773	0.136	327
rs111025428	8	84625044	WNK2	dpr	a	-0.442717	31.1873	2	0.118	0.133749	0.734	1	-0.325	-0.308968	0.266	320
rs110719592	8	84670248	WNK2	dpr	a	-0.437005	30.6665	2	0.116	0.13373	0.734	1	-0.321	-0.303275	0.266	343
rs41608637	8	89926318	LOC101902749	dpr	a	0.506672	23.1293	1	0.444	0.459967	0.125	2	-0.0632	-0.046705	0.875	921
rs110022109	9	30760081	5S-rRNA(u)	dpr	a	-0.388405	30.5486	2	0.196	0.20432	0.497	1	-0.193	-0.184085	0.503	346
rs42373974	9	52683097	KLHL32	dpr	a	-0.473253	36.0259	2	0.346	0.364331	0.269	1	-0.127	-0.108922	0.731	179
rs110195414	9	53090051	GPR63-FHL5	dpr	a	0.435881	27.0949	1	0.335	0.347877	0.233	2	-0.101	-0.088004	0.767	551
rs109284624	9	65523282	CYB5R4	dpr	a	-0.358854	26.1901	2	0.202	0.219867	0.437	1	-0.157	-0.138987	0.563	609
rs110230863	9	66566266	PTPRK	dpr	a	0.347172	23.6284	1	0.183	0.205005	0.474	2	-0.165	-0.142166	0.526	867
rs133907394	9	66611805	PTPRK	dpr	a	0.339934	23.3168	1	0.175	0.190572	0.487	2	-0.165	-0.149362	0.513	899
rs134140171	9	70321766	MOXD1	dpr	a	-0.519663	22.8749	2	0.0605	0.078829	0.884	1	-0.459	-0.440834	0.116	951
rs136594372	9	70451572	STX7-TAAR9	dpr	a	0.534237	23.9748	1	0.0613	0.077762	0.885	2	-0.473	-0.456475	0.115	818
rs135978971	9	71245136	RPS12-EYA4	dpr	a	0.452951	30.9836	1	0.114	0.129845	0.749	2	-0.339	-0.323107	0.251	329
rs136299358	9	71292789	RPS12-EYA4	dpr	a	0.480615	37.3465	1	0.129	0.14817	0.731	2	-0.351	-0.332445	0.269	148
rs109322196	9	71388934	EYA4	dpr	a	0.528033	23.2396	1	0.0622	0.075488	0.882	2	-0.466	-0.452545	0.118	909
rs110790629	9	71522663	EYA4	dpr	a	-0.387554	29.0503	2	0.145	0.163758	0.626	1	-0.243	-0.223795	0.374	415
rs109830365	9	71565043	EYA4	dpr	a	0.386827	28.8775	1	0.144	0.161446	0.629	2	-0.243	-0.225381	0.371	425
rs3423294424	9	71619205	EYA4	dpr	a	0.553427	24.7619	1	0.0607	0.080038	0.89	2	-0.493	-0.473389	0.11	754
rs133987627	9	72065985	EYA4-TCF21	dpr	a	0.548418	23.9055	1	0.0607	0.076122	0.889	2	-0.488	-0.472296	0.111	830
rs41662471	9	72186135	SLC2A12	dpr	a	-0.475431	31.9944	2	0.104	0.122094	0.781	1	-0.371	-0.353336	0.219	294
rs109271753	9	72923043	ENSBTAG00000054673-5S-rRNA	dpr	a	0.446848	27.9047	1	0.0971	0.11321	0.783	2	-0.35	-0.333638	0.217	488
rs41663466	9	73009507	ALDH8A1-HBS1L	dpr	a	0.443609	27.4845	1	0.0964	0.113921	0.783	2	-0.347	-0.329688	0.217	524
rs110433742	9	73722129	5S-rRNA-ENSBTAG00000051219	dpr	a	0.468973	28.7941	1	0.093	0.110418	0.802	2	-0.376	-0.358554	0.198	428
rs109816575	9	73828781	ENSBTAG00000051219	dpr	a	-0.452018	26.2704	2	0.0873	0.104427	0.807	1	-0.365	-0.347591	0.193	600
rs110084815	9	74771426	MAP3K5-PEX7	dpr	a	-0.430091	24.1267	2	0.0848	0.103352	0.803	1	-0.345	-0.326738	0.197	798
rs109713461	9	74996230	IL20RA	dpr	a	0.411546	27.6066	1	0.111	0.128047	0.73	2	-0.3	-0.283499	0.27	513
rs109483390	9	75842621	U6-PERP	dpr	a	-0.3541	23.8711	2	0.127	0.144557	0.642	1	-0.227	-0.209543	0.358	836
rs136777254	9	75844495	U6-PERP	dpr	a	0.363105	24.4149	1	0.129	0.142586	0.644	2	-0.234	-0.220519	0.356	775
rs110794449	9	76044703	ARFGEF3	dpr	a	0.341826	22.5393	1	0.125	0.141726	0.635	2	-0.217	-0.200101	0.365	985
rs109456977	9	76084442	ARFGEF3	dpr	a	0.364531	24.803	1	0.135	0.150908	0.629	2	-0.229	-0.213623	0.371	740
rs136632421	9	76217515	NHSL1	dpr	a	-0.368302	26.1012	2	0.145	0.158391	0.607	1	-0.224	-0.209912	0.393	615
rs133604677	9	76276892	NHSL1	dpr	a	-0.347224	23.0982	2	0.131	0.144486	0.624	1	-0.217	-0.202737	0.376	923
rs109949830	9	76740980	REPS1-ABRACL	dpr	a	0.448582	28.9789	1	0.105	0.118323	0.765	2	-0.343	-0.330259	0.235	419
rs109747205	9	76804356	ABRACL-HECA	dpr	a	0.45391	31.3366	1	0.111	0.128731	0.755	2	-0.343	-0.325179	0.245	310
rs109351097	9	76900024	HECA-TXLNB	dpr	a	0.414739	26.997	1	0.111	0.127228	0.733	2	-0.304	-0.287511	0.267	556
rs136973874	9	77054960	U5(d)	dpr	a	0.350349	22.938	1	0.13	0.145734	0.63	2	-0.221	-0.204615	0.37	948
rs133389577	9	77218355	LOC112448069	dpr	a	-0.394648	25.2376	2	0.106	0.124097	0.731	1	-0.288	-0.270552	0.269	682
rs41664353	9	77275436	U5(d)	dpr	a	0.403215	29.0478	1	0.128	0.146257	0.682	2	-0.275	-0.256958	0.318	416
rs3423277916	9	77340252	U5(d)	dpr	a	-0.413976	25.9063	2	0.1	0.117859	0.757	1	-0.314	-0.296117	0.243	632
rs3423289905	9	77345010	U5(d)	dpr	a	0.446433	27.5596	1	0.109	0.124759	0.756	2	-0.337	-0.321674	0.244	520
rs134575759	9	77756518	ENSBTAG00000052963(u)	dpr	a	0.418221	27.2995	1	0.106	0.12384	0.745	2	-0.312	-0.294382	0.255	537
rs109006879	9	78329786	ENSBTAG00000052963-ENSBTAG00000052619	dpr	a	-0.366302	23.2161	2	0.11	0.127603	0.7	1	-0.256	-0.238699	0.3	911
rs110282352	10	58971737	GLDN	dpr	a	0.368602	25.9676	1	0.136	0.15516	0.63	2	-0.232	-0.213442	0.37	626
rs110304273	10	58999970	GLDN	dpr	a	0.355279	26.0693	1	0.177	0.195192	0.501	2	-0.178	-0.160087	0.499	621
rs43335166	10	59343821	TNFAIP8L3	dpr	a	-0.348763	25.0362	2	0.177	0.195678	0.493	1	-0.172	-0.153085	0.507	716
rs133531749	10	59807572	USP8	dpr	a	-0.396492	24.4642	2	0.107	0.129367	0.731	1	-0.29	-0.267126	0.269	772
rs108975426	10	59830116	USP8	dpr	a	-0.349772	23.1439	2	0.126	0.144646	0.638	1	-0.223	-0.205126	0.362	920
rs109112702	10	60440273	LOC112448487	dpr	a	-0.355873	25.0922	2	0.152	0.171958	0.574	1	-0.204	-0.183915	0.426	709
rs134404801	10	60807297	FGF7	dpr	a	-0.353219	25.2152	2	0.157	0.175033	0.555	1	-0.196	-0.178185	0.445	689
rs110901772	10	60986053	GALK2	dpr	a	-0.376419	29.0991	2	0.182	0.200028	0.516	1	-0.194	-0.176391	0.484	411
rs43638065	10	61462408	CEP152	dpr	a	-0.339212	23.0104	2	0.141	0.159175	0.583	1	-0.198	-0.180037	0.417	935
rs109565014	10	62005356	FBN1-DUT	dpr	a	-0.345579	24.3687	2	0.195	0.213589	0.436	1	-0.151	-0.13199	0.564	782
rs41663640	10	63984589	5S-rRNA(d)	dpr	a	-0.402479	27.0108	2	0.115	0.132196	0.715	1	-0.288	-0.270283	0.285	555
rs108939593	10	64005836	5S-rRNA(d)	dpr	a	-0.352387	24.0696	2	0.134	0.151721	0.619	1	-0.218	-0.200667	0.381	803
rs41597796	10	66129758	U6-U6	dpr	a	-0.335137	22.847	2	0.167	0.18701	0.503	1	-0.169	-0.148128	0.497	954
rs41611714	10	66406378	U6-BMP4	dpr	a	-0.340814	23.7943	2	0.158	0.175069	0.535	1	-0.182	-0.165745	0.465	847
rs109611920	10	66542380	BMP4-CDKN3	dpr	a	0.333603	22.9611	1	0.166	0.182712	0.503	2	-0.168	-0.150891	0.497	947
rs134205369	10	67019894	CGRRF1	dpr	a	0.333648	22.6948	1	0.16	0.172875	0.52	2	-0.174	-0.160773	0.48	973
rs109116362	10	67183570	SAMD4A	dpr	a	-0.347096	24.7918	2	0.178	0.196744	0.486	1	-0.169	-0.150352	0.514	742
rs110500404	10	68164248	KTN1-ENSBTAG00000049100	dpr	a	0.332266	22.7501	1	0.159	0.176431	0.522	2	-0.174	-0.155835	0.478	968
rs109511274	10	68176383	ENSBTAG00000049100	dpr	a	0.357145	22.584	1	0.113	0.126891	0.683	2	-0.244	-0.230254	0.317	984
rs42230125	10	68307915	ENSBTAG00000049100	dpr	a	-0.348042	24.3755	2	0.148	0.164829	0.576	1	-0.2	-0.183213	0.424	779
rs135316717	10	68394131	ENSBTAG00000049100-PELI2	dpr	a	0.35503	24.3141	1	0.14	0.159486	0.605	2	-0.215	-0.195545	0.395	785
rs41903746	10	68473770	LOC101903945	dpr	a	0.351199	24.2501	1	0.155	0.179258	0.559	2	-0.196	-0.171941	0.441	792
rs42223324	10	68706049	PELI2	dpr	a	-0.335074	22.9885	2	0.152	0.169357	0.548	1	-0.184	-0.165716	0.452	942
rs43639551	10	69722290	SNORA72-NAA30	dpr	a	0.352527	25.1262	1	0.153	0.170809	0.567	2	-0.2	-0.181718	0.433	704
rs43638613	10	69778006	NAA30	dpr	a	-0.354013	25.379	2	0.156	0.174216	0.56	1	-0.198	-0.179798	0.44	675
rs109888062	11	38615193	LOC107132925	dpr	a	-0.562387	38.1363	2	0.105	0.12073	0.814	1	-0.458	-0.441656	0.186	134
rs110005576	11	39708942	blank	dpr	a	0.53337	23.5153	1	0.0631	0.08263	0.882	2	-0.47	-0.45074	0.118	877
rs109827430	11	60725163	B3GNT2	dpr	a	-0.342356	23.8531	2	0.183	0.203113	0.464	1	-0.159	-0.139243	0.536	838
rs41613823	11	67918716	AAK1	dpr	a	0.348426	24.2507	1	0.203	0.218809	0.417	2	-0.145	-0.129617	0.583	791
rs133703697	11	70522119	ALK	dpr	a	-0.356262	24.7696	2	0.146	0.165803	0.589	1	-0.21	-0.190459	0.411	749
rs133239317	11	70678490	CLIP4	dpr	a	-0.441063	25.4791	2	0.351	0.374024	0.203	1	-0.0897	-0.067039	0.797	665
rs136830005	11	71320923	ENSBTAG00000052885-ENSBTAG00000048347	dpr	a	0.377896	24.9438	1	0.262	0.281193	0.307	2	-0.116	-0.096703	0.693	725
rs132827762	11	71521561	BABAM2	dpr	a	0.331376	22.5308	1	0.173	0.193102	0.477	2	-0.158	-0.138274	0.523	986
rs111025243	11	71768791	BABAM2	dpr	a	0.451497	27.8978	1	0.356	0.376506	0.212	2	-0.0958	-0.074991	0.788	489
rs110703220	11	72212931	IFT172	dpr	a	0.399767	29.6941	1	0.262	0.280734	0.344	2	-0.137	-0.119033	0.656	377
rs134557070	11	72245199	NRBP1	dpr	a	-0.387345	30.6869	2	0.2	0.217867	0.483	1	-0.187	-0.169478	0.517	341
rs132662588	11	72379184	SLC30A3	dpr	a	-0.511225	30.7093	2	0.422	0.441098	0.175	1	-0.0896	-0.070127	0.825	340
rs109462000	11	72448126	SLC5A6-TCF23	dpr	a	0.423035	26.682	1	0.322	0.341731	0.239	2	-0.101	-0.081304	0.761	569
rs132699446	11	72509464	ABHD1	dpr	a	-0.373228	24.4708	2	0.252	0.265802	0.325	1	-0.121	-0.107426	0.675	771
rs108963905	11	72567462	AGBL5	dpr	a	-0.463329	32.5049	2	0.351	0.3686	0.243	1	-0.113	-0.094729	0.757	278
rs110439775	11	72819729	SLC35F6	dpr	a	-0.39729	23.7359	2	0.301	0.319561	0.241	1	-0.0958	-0.077729	0.759	854
rs137349576	11	72869443	KCNK3	dpr	a	-0.435448	34.2759	2	0.29	0.310474	0.333	1	-0.145	-0.124973	0.667	226
rs137755103	11	72881642	CIB4	dpr	a	-0.425668	31.8255	2	0.279	0.301134	0.346	1	-0.147	-0.124533	0.654	299
rs110121425	11	72891946	CIB4	dpr	a	0.423606	32.7214	1	0.276	0.293447	0.35	2	-0.148	-0.130159	0.65	275
rs132788058	11	73807254	DTNB	dpr	a	0.393759	27.4519	1	0.267	0.285244	0.322	2	-0.127	-0.108515	0.678	528
rs108989067	11	74248812	EFR3B-DNAJC27	dpr	a	0.579032	40.4298	1	0.474	0.493341	0.181	2	-0.105	-0.085692	0.819	106
rs134531335	11	74520184	NCOA1	dpr	a	-0.518214	35.2804	2	0.411	0.430929	0.206	1	-0.107	-0.087285	0.794	197
rs133437045	11	80390058	RDH14-ENSBTAG00000051528	dpr	a	0.51013	25.8467	1	0.437	0.4522	0.143	2	-0.0731	-0.05793	0.857	637
rs109557615	11	82774027	NBAS	dpr	a	-0.38613	22.5946	2	0.292	0.3088	0.243	1	-0.0939	-0.07733	0.757	982
rs109117939	11	83924697	LRATD1-ENSBTAG00000019284	dpr	a	-0.516051	32.8802	2	0.42	0.437707	0.186	1	-0.0958	-0.078345	0.814	268
rs110428662	11	83985738	LRATD1-ENSBTAG00000019284	dpr	a	0.605802	37.4703	1	0.517	0.533806	0.147	2	-0.0891	-0.071996	0.853	145
rs29017217	11	85606528	ENSBTAG00000044370-LPIN1	dpr	a	-0.380611	29.4216	2	0.195	0.211978	0.487	1	-0.185	-0.168632	0.513	390
rs110964572	11	85771451	ENSBTAG00000044370-LPIN1	dpr	a	-0.348718	24.7645	2	0.194	0.212174	0.442	1	-0.154	-0.136544	0.558	750
rs109584185	11	85791024	ENSBTAG00000044370-LPIN1	dpr	a	0.396753	29.5063	1	0.187	0.205933	0.528	2	-0.209	-0.190821	0.472	385
rs41618766	11	85810220	ENSBTAG00000044370-LPIN1	dpr	a	-0.368029	26.4393	2	0.226	0.244109	0.385	1	-0.142	-0.12392	0.615	591
rs110556461	11	85999076	LOC112448828	dpr	a	0.428367	29.1863	1	0.315	0.332849	0.264	2	-0.113	-0.095518	0.736	403
rs132647549	11	86147235	LPIN1	dpr	a	-0.50208	30.1395	2	0.407	0.427814	0.189	1	-0.095	-0.074266	0.811	358
rs133603335	11	86719277	LOC112448829	dpr	a	-0.523537	30.8429	2	0.437	0.454893	0.166	1	-0.0867	-0.068644	0.834	334
rs41618959	11	87117767	NOL10-ODC1	dpr	a	0.437049	29.2933	1	0.328	0.346168	0.248	2	-0.109	-0.09088	0.752	395
rs132935701	11	87742709	TAF1B-YWHAQ	dpr	a	0.352614	22.6748	1	0.226	0.240556	0.358	2	-0.126	-0.112059	0.642	977
rs41620554	11	88617471	LOC101905845	dpr	a	0.499219	32.7755	1	0.399	0.416769	0.2	2	-0.1	-0.08245	0.8	272
rs136582267	11	88844883	ENSBTAG00000052273-ENSBTAG00000037793	dpr	a	0.339895	22.4437	1	0.154	0.168377	0.548	2	-0.186	-0.171517	0.452	992
rs110869054	11	88922785	ENSBTAG00000052273-ENSBTAG00000037793	dpr	a	-0.405319	31.0972	2	0.259	0.277596	0.362	1	-0.147	-0.127723	0.638	322
rs3423313107	11	97135863	MVB12B	dpr	a	-0.34723	22.3982	2	0.121	0.139916	0.652	1	-0.226	-0.207314	0.348	997
rs132885815	13	36755981	ODAD2-MKX	dpr	a	0.336181	23.3248	1	0.18	0.195484	0.465	2	-0.156	-0.140697	0.535	898
rs41689933	13	39157865	SLC24A3	dpr	a	0.384122	23.9905	1	0.104	0.121515	0.729	2	-0.28	-0.262607	0.271	815
rs110553998	13	40200790	RALGAPA2-SNORA70	dpr	a	-0.382538	26.1555	2	0.122	0.139787	0.682	1	-0.261	-0.242751	0.318	611
rs134270882	13	40204510	RALGAPA2-SNORA70	dpr	a	0.359389	25.0488	1	0.137	0.154836	0.618	2	-0.222	-0.204553	0.382	714
rs41690422	13	43052440	ASB13-ENSBTAG00000027416	dpr	a	-0.380978	22.9816	2	0.0986	0.116367	0.741	1	-0.282	-0.264611	0.259	945
rs110392158	13	45703886	ENSBTAG00000052659-ENSBTAG00000050649	dpr	a	-0.45998	23.079	2	0.0744	0.088221	0.838	1	-0.386	-0.371759	0.162	928
rs42341653	13	48655658	FERMT1-BMP2	dpr	a	-0.345619	24.5035	2	0.159	0.177251	0.539	1	-0.186	-0.168369	0.461	766
rs42340844	13	48771823	FERMT1-BMP2	dpr	a	-0.366631	27.4699	2	0.186	0.204664	0.492	1	-0.18	-0.161967	0.508	525
rs41619212	13	52964454	TGM3-STK35	dpr	a	0.421406	32.7357	1	0.142	0.160246	0.662	2	-0.279	-0.26116	0.338	273
rs110919661	13	53015250	STK35	dpr	a	0.495731	26.0971	1	0.0773	0.091315	0.844	2	-0.418	-0.404416	0.156	617
ARS-BFGL-NGS-37275	13	53694051	MYT1	dpr	a	0.365717	27.0191	1	0.155	0.172567	0.577	2	-0.211	-0.19315	0.423	554
rs137570808	13	53714681	MYT1	dpr	a	0.42985	34.3848	1	0.148	0.165982	0.655	2	-0.282	-0.263868	0.345	220
rs41692027	13	53954346	TPD52L2	dpr	a	-0.403954	33.3848	2	0.191	0.208583	0.527	1	-0.213	-0.195371	0.473	257
rs41692839	13	53992561	ZBTB46	dpr	a	-0.407108	33.9147	2	0.193	0.210335	0.527	1	-0.214	-0.196773	0.473	238
rs109686094	13	54024608	ZBTB46	dpr	a	0.457366	38.7268	1	0.157	0.174679	0.658	2	-0.301	-0.282687	0.342	122
rs135796720	13	54055781	TNFRSF6B	dpr	a	0.450465	38.0692	1	0.163	0.179843	0.639	2	-0.288	-0.270622	0.361	136
rs132872452	13	54062111	RTEL1	dpr	a	0.451216	37.7398	1	0.155	0.172686	0.656	2	-0.296	-0.27853	0.344	139
rs41630030	13	54065681	RTEL1	dpr	a	-0.447353	36.1866	2	0.153	0.167367	0.658	1	-0.294	-0.279986	0.342	175
rs134237742	13	54598752	MRGBP-NTSR1	dpr	a	-0.479391	43.2701	2	0.172	0.190189	0.641	1	-0.307	-0.289202	0.359	82
rs41696761	13	54955140	OSBPL2	dpr	a	0.407813	33.9804	1	0.217	0.235577	0.468	2	-0.191	-0.172235	0.532	237
rs136012119	13	55101509	TAF4	dpr	a	0.476345	27.2478	1	0.0851	0.101873	0.821	2	-0.391	-0.374471	0.179	541
rs41692756	13	55474114	CDH4	dpr	a	0.471572	34.0071	1	0.116	0.133916	0.753	2	-0.355	-0.337656	0.247	236
rs109725450	13	55540693	CDH4	dpr	a	0.456497	33.0537	1	0.12	0.136731	0.737	2	-0.337	-0.319767	0.263	263
rs134063217	13	55995501	ENSBTAG00000051857(u)	dpr	a	-0.418652	22.8265	2	0.0827	0.099672	0.802	1	-0.336	-0.318981	0.198	957
rs110768475	13	73458301	STK4	dpr	a	-0.380417	28.8204	2	0.157	0.17504	0.587	1	-0.223	-0.205377	0.413	427
rs109321555	13	73784937	ENSBTAG00000053258-ENSBTAG00000046614	dpr	a	0.35616	25.8702	1	0.188	0.204999	0.473	2	-0.169	-0.151161	0.527	634
rs29020756	13	74637379	ZSWIM3	dpr	a	-0.388699	27.7265	2	0.255	0.272695	0.343	1	-0.133	-0.116003	0.657	504
rs110946018	13	75223225	ELMO2-ENSBTAG00000047336	dpr	a	-0.394259	27.7088	2	0.262	0.27361	0.336	1	-0.133	-0.120649	0.664	506
rs135464556	13	75851368	ZMYND8	dpr	a	-0.340886	23.4685	2	0.152	0.167566	0.555	1	-0.189	-0.17332	0.445	881
rs136880486	14	3050984	PTK2-AGO2	dpr	a	0.37017	23.9708	1	0.119	0.134826	0.679	2	-0.251	-0.235344	0.321	819
rs137398343	14	33294132	SULF1	dpr	a	0.402653	23.4916	1	0.0943	0.111315	0.766	2	-0.308	-0.291337	0.234	878
rs134370176	14	33633860	SLCO5A1	dpr	a	-0.383197	26.1915	2	0.122	0.138156	0.682	1	-0.262	-0.24504	0.318	607
rs110236886	14	33650257	SLCO5A1-PRDM14	dpr	a	0.379052	25.1841	1	0.117	0.134047	0.692	2	-0.262	-0.245005	0.308	694
rs110260188	14	33688217	SLCO5A1-PRDM14	dpr	a	0.390071	25.5606	1	0.111	0.128126	0.715	2	-0.279	-0.261946	0.285	655
rs41617802	14	34727883	ENSBTAG00000043212-EYA1	dpr	a	-0.412717	25.3887	2	0.0979	0.115669	0.763	1	-0.315	-0.297048	0.237	672
rs135741190	14	34740292	ENSBTAG00000043212-EYA1	dpr	a	-0.42791	27.5458	2	0.104	0.12156	0.757	1	-0.324	-0.30635	0.243	522
rs3423371112	14	36416626	TERF1	dpr	a	0.407032	23.9479	1	0.092	0.109227	0.774	2	-0.315	-0.297805	0.226	823
rs3423093418	14	36581802	ENSBTAG00000048369-C14H8orf89	dpr	a	0.390818	24.4968	1	0.103	0.121794	0.737	2	-0.288	-0.269025	0.263	768
rs3423094080	14	37262411	LY96	dpr	a	-0.338867	23.2878	2	0.183	0.200933	0.459	1	-0.155	-0.137933	0.541	903
rs3423093251	14	37340881	ENSBTAG00000048533-U6	dpr	a	0.370197	27.0639	1	0.149	0.167021	0.597	2	-0.221	-0.203176	0.403	552
rs3423364025	14	37343274	ENSBTAG00000048533-U6	dpr	a	-0.356577	25.0896	2	0.159	0.172181	0.553	1	-0.197	-0.184396	0.447	711
rs3423379124	14	37352616	ENSBTAG00000048533-U6	dpr	a	-0.351142	23.6273	2	0.13	0.146986	0.629	1	-0.221	-0.204156	0.371	868
rs3423353290	14	37371702	LOC112449517	dpr	a	-0.356136	25.9256	2	0.169	0.187033	0.524	1	-0.187	-0.169103	0.476	630
rs3423093643	14	37548790	JPH1	dpr	a	-0.390194	24.375	2	0.103	0.120617	0.736	1	-0.287	-0.269577	0.264	780
rs3423367392	14	37605589	JPH1-GDAP1	dpr	a	-0.47065	27.6744	2	0.0883	0.106964	0.812	1	-0.382	-0.363686	0.188	509
rs3423379381	14	38289002	PI15-CRISPLD1	dpr	a	0.492488	30.5593	1	0.0931	0.109194	0.811	2	-0.399	-0.383293	0.189	345
rs42590589	14	38622008	ENSBTAG00000047574-HNF4G	dpr	a	-0.427948	25.1622	2	0.0903	0.107897	0.789	1	-0.338	-0.32005	0.211	698
rs134148750	14	38628644	ENSBTAG00000047574-HNF4G	dpr	a	-0.413982	25.3693	2	0.0976	0.113766	0.764	1	-0.316	-0.300216	0.236	677
rs41620111	14	48202902	U6-TRPS1	dpr	a	-0.394292	26.4771	2	0.115	0.132753	0.708	1	-0.279	-0.261539	0.292	586
rs41913235	14	48226688	U6-TRPS1	dpr	a	-0.389503	23.7982	2	0.102	0.11542	0.739	1	-0.288	-0.274084	0.261	846
rs110270244	14	48285366	U6-TRPS1	dpr	a	0.437596	25.217	1	0.0884	0.103037	0.798	2	-0.349	-0.334559	0.202	688
rs137138386	14	48355737	TRPS1(u)	dpr	a	0.423427	28.3523	1	0.111	0.124902	0.738	2	-0.313	-0.298525	0.262	463
rs109759551	15	57599986	SLC5A12-FIBIN	dpr	a	-0.354789	23.9928	2	0.145	0.157396	0.59	1	-0.209	-0.197393	0.41	813
rs42530896	15	62058172	DCDC1	dpr	a	0.364138	24.8198	1	0.237	0.25498	0.349	2	-0.127	-0.109158	0.651	738
rs42402812	15	62377899	ELP4	dpr	a	0.400353	28.2134	1	0.276	0.293199	0.311	2	-0.125	-0.107154	0.689	472
rs132916178	15	62468802	ELP4	dpr	a	-0.362028	26.9074	2	0.187	0.201497	0.484	1	-0.175	-0.160531	0.516	563
rs137624851	15	63246083	ENSBTAG00000052000-EIF3M	dpr	a	-0.414712	23.5649	2	0.326	0.342391	0.213	1	-0.0884	-0.072322	0.787	873
rs133266080	15	63267497	ENSBTAG00000052000-EIF3M	dpr	a	-0.434095	32.4598	2	0.288	0.302582	0.337	1	-0.146	-0.131513	0.663	279
rs110493192	15	63550366	LOC112441585	dpr	a	0.400585	22.9933	1	0.0962	0.109751	0.76	2	-0.304	-0.290835	0.24	940
rs111001091	15	64208168	KIAA1549L	dpr	a	0.380523	23.2042	1	0.28	0.296769	0.265	2	-0.101	-0.083754	0.735	914
rs135295627	15	65398713	EHF-APIP	dpr	a	-0.364072	25.8269	2	0.222	0.238304	0.391	1	-0.142	-0.125768	0.609	638
rs41780389	15	65968320	PAMR1	dpr	a	-0.382454	28.7604	2	0.19	0.202553	0.504	1	-0.193	-0.179901	0.496	432
rs133561929	15	70262112	5S-rRNA-LRRC4C	dpr	a	0.41183	30.2773	1	0.264	0.279012	0.358	2	-0.147	-0.132818	0.642	354
rs41779930	15	70392722	5S-rRNA-LRRC4C	dpr	a	0.438477	27.9431	1	0.337	0.354201	0.23	2	-0.101	-0.084276	0.77	487
rs41779214	15	70461005	ENSBTAG00000049512	dpr	a	-0.400695	27.718	2	0.27	0.281003	0.326	1	-0.131	-0.119692	0.674	505
rs41576433	15	70560636	ENSBTAG00000049512	dpr	a	-0.445812	29.1621	2	0.342	0.359633	0.233	1	-0.104	-0.086178	0.767	405
rs137118229	15	71980973	blank	dpr	a	0.391033	28.602	1	0.178	0.191984	0.545	2	-0.213	-0.199049	0.455	440
rs135828120	15	72013428	blank	dpr	a	0.39943	29.9202	1	0.188	0.200864	0.53	2	-0.212	-0.198566	0.47	367
rs41576473	15	72173567	ENSBTAG00000051591(u)	dpr	a	-0.468069	35.2091	2	0.342	0.357562	0.269	1	-0.126	-0.110508	0.731	199
rs110855054	15	72252145	ENSBTAG00000051591(u)	dpr	a	0.356034	23.8985	1	0.215	0.226184	0.397	2	-0.141	-0.129851	0.603	832
rs109179791	15	72577992	ENSBTAG00000051591(d)	dpr	a	-0.335695	22.8655	2	0.187	0.204502	0.444	1	-0.149	-0.131193	0.556	953
rs110271945	15	72838306	ENSBTAG00000051591(d)	dpr	a	0.418691	34.6872	1	0.239	0.251574	0.43	2	-0.18	-0.167117	0.57	212
rs110497786	15	72867256	ENSBTAG00000051591(d)	dpr	a	0.365968	24.6819	1	0.123	0.141126	0.663	2	-0.243	-0.224842	0.337	756
rs134978812	15	72999264	ENSBTAG00000051591-API5	dpr	a	0.399004	26.4024	1	0.122	0.13738	0.694	2	-0.277	-0.261624	0.306	593
rs110314216	15	73018714	ENSBTAG00000051591-API5	dpr	a	-0.349331	25.1614	2	0.171	0.1885	0.511	1	-0.179	-0.160831	0.489	699
rs110088256	15	73058621	ENSBTAG00000051591-API5	dpr	a	0.350811	22.6801	1	0.125	0.13969	0.643	2	-0.226	-0.211121	0.357	975
rs110330779	15	73231049	API5(u)	dpr	a	-0.342089	24.1234	2	0.166	0.184734	0.516	1	-0.177	-0.157355	0.484	799
rs41785075	15	73494231	TTC17	dpr	a	0.335757	22.9763	1	0.188	0.205523	0.441	2	-0.148	-0.130234	0.559	946
rs43679980	15	73647677	ENSBTAG00000055167-ENSBTAG00000048487	dpr	a	0.345488	23.2895	1	0.133	0.151608	0.615	2	-0.212	-0.193879	0.385	902
Hapmap46540-BTA-93429	15	73774930	ENSBTAG00000055167-HSD17B12	dpr	a	-0.366637	24.7621	2	0.242	0.263905	0.339	1	-0.124	-0.102732	0.661	753
rs43136512	15	73780275	ENSBTAG00000055167-HSD17B12	dpr	a	-0.401633	27.6047	2	0.276	0.294754	0.313	1	-0.126	-0.106879	0.687	514
rs42365473	15	73852698	HSD17B12	dpr	a	-0.429191	30.7455	2	0.292	0.317591	0.319	1	-0.137	-0.1116	0.681	338
rs109711583	15	73956444	HSD17B12	dpr	a	0.430666	37.0443	1	0.239	0.257581	0.446	2	-0.192	-0.173085	0.554	153
rs42365434	15	73964566	HSD17B12-ALKBH3	dpr	a	0.350265	25.1133	1	0.159	0.176769	0.546	2	-0.191	-0.173496	0.454	707
rs136204043	15	74094835	C15H11orf96-ACCSL	dpr	a	0.445985	37.9309	1	0.194	0.220131	0.565	2	-0.252	-0.225854	0.435	137
rs110893645	15	74101712	C15H11orf96-ACCSL	dpr	a	0.45633	41.886	1	0.202	0.221212	0.557	2	-0.254	-0.235118	0.443	92
rs135562883	15	74140680	C15H11orf96-ACCSL	dpr	a	0.428696	35.219	1	0.18	0.205105	0.579	2	-0.248	-0.223591	0.421	198
rs41781201	15	74148912	C15H11orf96-ACCSL	dpr	a	-0.466046	41.4481	2	0.261	0.287379	0.439	1	-0.205	-0.178667	0.561	93
rs135581922	15	74165872	ACCSL	dpr	a	0.414153	34.2535	1	0.182	0.204782	0.559	2	-0.232	-0.209371	0.441	229
rs41635074	15	74236733	EXT2	dpr	a	-0.353866	25.228	2	0.202	0.220186	0.429	1	-0.152	-0.13368	0.571	685
rs41635071	15	74277211	EXT2	dpr	a	0.363626	26.2257	1	0.147	0.165951	0.595	2	-0.216	-0.197675	0.405	603
rs41635069	15	74302264	EXT2	dpr	a	-0.346183	22.9848	2	0.128	0.145557	0.631	1	-0.218	-0.200626	0.369	943
rs110209173	15	74409395	ALX4	dpr	a	0.41316	34.7938	1	0.194	0.211925	0.53	2	-0.219	-0.201235	0.47	208
rs41782443	15	74489593	ALX4-CD82	dpr	a	0.415237	34.2994	1	0.193	0.210637	0.534	2	-0.222	-0.2046	0.466	223
rs133828057	15	74515686	ALX4-CD82	dpr	a	-0.361074	23.8402	2	0.121	0.14091	0.664	1	-0.24	-0.220164	0.336	841
rs135004916	15	74605346	ALX4-CD82	dpr	a	0.381092	25.1577	1	0.13	0.154182	0.658	2	-0.251	-0.22691	0.342	700
rs109764250	15	74619098	ALX4-CD82	dpr	a	-0.377079	28.1705	2	0.153	0.170565	0.595	1	-0.224	-0.206514	0.405	476
rs110097417	15	74640683	ALX4-CD82	dpr	a	-0.498052	42.2751	2	0.35	0.368703	0.297	1	-0.148	-0.129349	0.703	89
rs41781269	15	74967747	TSPAN18	dpr	a	-0.419412	30.836	2	0.277	0.301936	0.34	1	-0.143	-0.117476	0.66	335
rs41782056	15	75262659	PRDM11	dpr	a	0.350612	25.0643	1	0.195	0.212721	0.443	2	-0.155	-0.137891	0.557	712
ARS-BFGL-NGS-14315	15	75326304	SYT13	dpr	a	0.443117	36.1191	1	0.29	0.307545	0.346	2	-0.153	-0.135572	0.654	178
rs41782852	15	75328608	SYT13	dpr	a	0.374433	28.5043	1	0.203	0.220225	0.459	2	-0.172	-0.154208	0.541	447
rs109644955	15	75401438	SYT13-ENSBTAG00000050592	dpr	a	-0.361309	26.6206	2	0.199	0.21757	0.449	1	-0.162	-0.143739	0.551	573
rs110988713	15	75430142	SYT13-ENSBTAG00000050592	dpr	a	0.522202	43.369	1	0.379	0.404002	0.274	2	-0.143	-0.1182	0.726	81
rs132966627	15	75465430	SYT13-ENSBTAG00000050592	dpr	a	-0.359554	26.4651	2	0.167	0.184855	0.536	1	-0.193	-0.174699	0.464	589
rs133043602	15	75621016	ENSBTAG00000050592-ENSBTAG00000054083	dpr	a	-0.378024	26.532	2	0.236	0.254885	0.375	1	-0.142	-0.123139	0.625	581
rs135676709	15	75695986	ENSBTAG00000054083-CHST1	dpr	a	0.369348	25.3397	1	0.231	0.250746	0.376	2	-0.139	-0.118602	0.624	678
rs41788568	15	75857414	SLC35C1	dpr	a	0.397393	31.0775	1	0.237	0.253216	0.405	2	-0.161	-0.144177	0.595	323
rs109187331	15	76295386	CREB3L1	dpr	a	0.377586	28.1895	1	0.226	0.24335	0.403	2	-0.152	-0.134235	0.597	473
rs3423401401	15	76347304	DGKZ	dpr	a	0.425605	34.2781	1	0.259	0.272594	0.393	2	-0.167	-0.153012	0.607	225
rs41780879	15	76445841	AMBRA1	dpr	a	0.394887	30.843	1	0.216	0.231036	0.452	2	-0.179	-0.163851	0.548	333
rs41782227	15	76558471	AMBRA1	dpr	a	0.351778	24.1447	1	0.207	0.219267	0.411	2	-0.145	-0.132512	0.589	796
rs41782203	15	76586569	ATG13	dpr	a	-0.457401	36.8186	2	0.309	0.324199	0.325	1	-0.149	-0.133202	0.675	161
rs133739413	15	76648889	ZNF408-F2	dpr	a	-0.524029	44.0601	2	0.383	0.400419	0.269	1	-0.141	-0.12361	0.731	73
rs109244995	15	76721084	CKAP5	dpr	a	-0.337552	23.0926	2	0.18	0.194702	0.468	1	-0.158	-0.14285	0.532	926
rs3423410647	15	76783337	CKAP5-LRP4	dpr	a	-0.532011	46.1587	2	0.384	0.400565	0.278	1	-0.148	-0.131446	0.722	62
rs135760887	15	76918841	CSTPP1	dpr	a	0.394088	27.5636	1	0.268	0.285429	0.319	2	-0.126	-0.108659	0.681	518
rs137820175	15	77018335	CSTPP1	dpr	a	0.354845	25.5591	1	0.157	0.172305	0.558	2	-0.198	-0.18254	0.442	656
rs135859076	15	77171932	MADD	dpr	a	-0.532738	43.1977	2	0.395	0.408868	0.258	1	-0.137	-0.12387	0.742	84
rs110900734	15	77233229	LOC107133473	dpr	a	-0.540439	44.2235	2	0.407	0.423302	0.248	1	-0.134	-0.117137	0.752	69
rs109377034	15	77244369	SLC39A13	dpr	a	0.35495	24.0027	1	0.226	0.2426	0.364	2	-0.129	-0.11235	0.636	811
rs109892162	15	77255192	PSMC3	dpr	a	-0.542698	45.3035	2	0.405	0.421373	0.253	1	-0.137	-0.121325	0.747	66
rs41784300	15	77546541	NUP160	dpr	a	-0.373413	27.3637	2	0.146	0.163358	0.61	1	-0.228	-0.210054	0.39	533
rs110790059	15	77625253	LOC104974328	dpr	a	0.355078	23.2022	1	0.125	0.13552	0.648	2	-0.23	-0.219558	0.352	915
rs136540964	15	77693007	PTPRJ	dpr	a	-0.4804	36.6611	2	0.347	0.361285	0.277	1	-0.133	-0.119115	0.723	164
rs108957339	15	77860477	PTPRJ	dpr	a	-0.411203	32.3753	2	0.25	0.271842	0.392	1	-0.161	-0.139361	0.608	282
rs109209072	15	77884890	PTPRJ-OR4B1	dpr	a	-0.400698	32.9149	2	0.203	0.221444	0.493	1	-0.197	-0.179254	0.507	267
rs109624357	15	77905039	OR4B1-OR4B1H	dpr	a	0.337771	23.206	1	0.151	0.168613	0.552	2	-0.186	-0.169158	0.448	913
rs41626653	15	78110607	OR4C46	dpr	a	0.378915	29.146	1	0.206	0.226173	0.456	2	-0.173	-0.152743	0.544	406
rs109979535	15	78181890	ENSBTAG00000055009	dpr	a	-0.394677	31.8009	2	0.187	0.207034	0.526	1	-0.208	-0.187643	0.474	301
rs135226937	15	78347690	OR4A2M-OR4A2B	dpr	a	-0.382327	29.4766	2	0.176	0.197737	0.541	1	-0.207	-0.18459	0.459	386
rs109869787	15	78368959	OR4C1-OR4C1J	dpr	a	-0.365315	27.4562	2	0.192	0.209662	0.475	1	-0.173	-0.155654	0.525	526
rs109556038	15	78442168	OR4P7-OR5D79	dpr	a	0.375789	28.6402	1	0.18	0.198879	0.522	2	-0.196	-0.17691	0.478	439
rs110367374	15	78470794	OR5W2B	dpr	a	-0.448955	32.7949	2	0.322	0.346093	0.283	1	-0.127	-0.102862	0.717	271
rs43197822	15	78742839	OR5F2B-OR8H15	dpr	a	0.374839	24.9637	1	0.256	0.274028	0.316	2	-0.118	-0.100811	0.684	724
rs43500727	15	79024660	OR8I2	dpr	a	-0.417382	25.5649	2	0.0993	0.121102	0.762	1	-0.318	-0.296281	0.238	654
rs109095685	15	81332915	ENSBTAG00000021375	dpr	a	0.346291	23.5859	1	0.207	0.224603	0.403	2	-0.139	-0.121688	0.597	872
rs133057645	16	47227080	CHD5	dpr	a	-0.392209	22.6236	2	0.0919	0.111753	0.766	1	-0.3	-0.280456	0.234	981
rs41640562	16	55736428	ENSBTAG00000049490-GPR52	dpr	a	-0.377405	27.3735	2	0.139	0.157145	0.631	1	-0.238	-0.22026	0.369	532
rs42426692	17	66043038	SEZ6L	dpr	a	0.468384	28.7688	1	0.371	0.386315	0.207	2	-0.0969	-0.082069	0.793	431
rs41849895	17	68255450	ZNRF3	dpr	a	0.385901	25.0584	1	0.272	0.287176	0.296	2	-0.114	-0.098724	0.704	713
rs136728705	17	68995610	MTMR3	dpr	a	0.39261	30.8808	1	0.212	0.23025	0.459	2	-0.18	-0.16236	0.541	331
rs110090792	17	69093452	MTMR3	dpr	a	-0.378429	28.2443	2	0.204	0.223356	0.46	1	-0.174	-0.155073	0.54	468
rs109124120	17	69259482	HORMAD2-LIF	dpr	a	0.430505	33.5411	1	0.282	0.29569	0.344	2	-0.148	-0.134815	0.656	254
rs132891288	17	69337705	TBC1D10A-SF3A1	dpr	a	-0.384945	30.0361	2	0.209	0.225241	0.457	1	-0.176	-0.159704	0.543	364
rs109109645	17	69351312	SF3A1	dpr	a	0.386076	30.4289	1	0.207	0.224835	0.464	2	-0.179	-0.161242	0.536	351
rs109431077	17	69901913	ENSBTAG00000051325-SMTN	dpr	a	0.380748	22.4928	1	0.284	0.302727	0.254	2	-0.0967	-0.078022	0.746	990
rs110168908	17	69936818	ENSBTAG00000051325-SMTN	dpr	a	0.407716	29.7781	1	0.141	0.162633	0.653	2	-0.266	-0.245083	0.347	373
rs41852491	17	70004734	PLA2G3-RNF185	dpr	a	-0.498036	33.0381	2	0.392	0.416203	0.213	1	-0.106	-0.081832	0.787	265
rs41852476	17	70028737	RNF185	dpr	a	0.478556	38.4469	1	0.341	0.358329	0.288	2	-0.138	-0.120227	0.712	126
rs137022101	17	70109631	PIK3IP1-PATZ1	dpr	a	-0.396099	31.3448	2	0.222	0.237974	0.44	1	-0.174	-0.158125	0.56	309
rs41855264	17	70123759	PIK3IP1-PATZ1	dpr	a	-0.388255	30.9651	2	0.185	0.203128	0.523	1	-0.203	-0.185127	0.477	330
rs41634418	17	70345109	PRR14L	dpr	a	0.410761	28.5869	1	0.122	0.140528	0.704	2	-0.289	-0.270233	0.296	441
rs135814317	17	70411240	DEPDC5	dpr	a	0.341837	23.0897	1	0.202	0.218847	0.41	2	-0.14	-0.12299	0.59	927
rs135421200	18	43098493	ANKRD27	dpr	a	-0.409952	29.3495	2	0.144	0.175431	0.648	1	-0.266	-0.23452	0.352	392
rs132924769	18	43099149	ANKRD27	dpr	a	0.40465	29.4431	1	0.142	0.172773	0.648	2	-0.262	-0.231876	0.352	387
rs134164726	18	43101000	ANKRD27	dpr	a	-0.409596	31.4157	2	0.144	0.161622	0.649	1	-0.266	-0.247975	0.351	307
rs135104789	18	43102660	ANKRD27	dpr	a	-0.409943	29.2913	2	0.143	0.174066	0.65	1	-0.266	-0.235877	0.35	396
rs210978087	18	43111863	ANKRD27	dpr	a	-0.450602	24.3848	2	0.0803	0.09765	0.822	1	-0.37	-0.352952	0.178	777
rs41882253	18	43514901	GPATCH1	dpr	a	0.394681	24.87	1	0.104	0.120489	0.736	2	-0.29	-0.274192	0.264	732
rs379667522	18	43594730	WDR88	dpr	a	0.53715	43.6068	1	0.132	0.149259	0.754	2	-0.405	-0.387892	0.246	77
rs42905166	18	43597221	WDR88-LRP3	dpr	a	0.368598	28.1874	1	0.192	0.209276	0.48	2	-0.177	-0.159322	0.52	474
rs41884737	18	43786051	CEBPG (u)	dpr	a	1.01002	58.8035	1	0.0773	0.09595	0.923	2	-0.933	-0.91407	0.0766	14
rs41885943	18	43854199	PEPD	dpr	a	0.990072	57.7872	1	0.0777	0.096166	0.922	2	-0.912	-0.893906	0.0784	15
rs110940015	18	43876270	PEPD	dpr	a	0.585893	34.4594	1	0.0906	0.121428	0.845	2	-0.495	-0.464464	0.155	218
rs133443778	18	43887966	PEPD	dpr	a	0.965982	49.9063	1	0.0745	0.108091	0.923	2	-0.891	-0.857891	0.0772	35
rs109622162	18	43936602	PEPD	dpr	a	-0.592934	35.5145	2	0.0849	0.103048	0.857	1	-0.508	-0.489885	0.143	189
rs108998049	18	44128299	CHST8	dpr	a	-0.558758	40.9897	2	0.113	0.137137	0.797	1	-0.445	-0.421621	0.203	96
rs43746558	18	44167440	CHST8	dpr	a	1.01162	53.9407	1	0.0756	0.108424	0.925	2	-0.936	-0.903197	0.0747	19
rs135084997	18	44221413	KCTD15-ENSBTAG00000050669	dpr	a	0.418495	35.3577	1	0.178	0.196231	0.574	2	-0.24	-0.222264	0.426	193
rs134873849	18	44380074	ENSBTAG00000050669	dpr	a	-0.589678	44.0956	2	0.113	0.130517	0.809	1	-0.477	-0.459162	0.191	72
rs136004411	18	44383419	ENSBTAG00000050669	dpr	a	-0.41817	26.139	2	0.102	0.123431	0.757	1	-0.316	-0.294739	0.243	613
rs41885126	18	44412360	ENSBTAG00000050669-LSM14A	dpr	a	0.396682	31.4852	1	0.169	0.184449	0.574	2	-0.228	-0.212233	0.426	306
rs41886137	18	44452933	ENSBTAG00000050669-LSM14A	dpr	a	0.508614	37.6265	1	0.117	0.136021	0.769	2	-0.391	-0.372593	0.231	140
rs132979560	18	44585467	ENSBTAG00000050669-LSM14A	dpr	a	0.401015	26.9869	1	0.121	0.142269	0.698	2	-0.28	-0.258746	0.302	558
rs41880544	18	44688799	U1-GARRE1	dpr	a	0.421224	24.3742	1	0.0909	0.112609	0.784	2	-0.33	-0.308615	0.216	781
rs109567975	18	45810571	HPN-ENSBTAG00000054525	dpr	a	-0.517859	34.9973	2	0.103	0.120117	0.802	1	-0.415	-0.397743	0.198	205
rs133559615	18	46545843	NPHS1	dpr	a	-0.46448	23.1506	2	0.0713	0.087416	0.846	1	-0.393	-0.377064	0.154	918
rs41614896	18	46899428	ENSBTAG00000031687-ZNF567	dpr	a	0.35319	25.4579	1	0.178	0.19701	0.495	2	-0.175	-0.15618	0.505	668
rs41604526	18	47494831	ZNF570-ZNF420	dpr	a	0.352142	24.999	1	0.203	0.220775	0.423	2	-0.149	-0.131367	0.577	719
rs110061700	18	47814171	SIPA1L3	dpr	a	0.386937	23.9418	1	0.284	0.301266	0.265	2	-0.103	-0.085672	0.735	824
rs109972395	18	47886323	SIPA1L3	dpr	a	-0.637074	56.8632	2	0.145	0.163822	0.772	1	-0.492	-0.473252	0.228	16
rs109014173	18	48109540	SPINT2-C18H19orf33	dpr	a	-0.415083	32.1703	2	0.269	0.285789	0.352	1	-0.146	-0.129293	0.648	288
rs109242302	18	48143136	KCNK6	dpr	a	-0.402399	29.7894	2	0.248	0.26024	0.384	1	-0.155	-0.142159	0.616	371
rs41884236	18	48170606	CATSPERG	dpr	a	-0.384294	29.8429	2	0.203	0.217269	0.472	1	-0.181	-0.167025	0.528	369
rs110379081	18	48272264	RYR1	dpr	a	-0.451521	40.8925	2	0.194	0.211858	0.57	1	-0.258	-0.239663	0.43	100
rs3423457479	18	48305042	RYR1	dpr	a	0.574835	42.6865	1	0.123	0.134811	0.787	2	-0.452	-0.440024	0.213	87
rs41885290	18	48480775	CAPN12	dpr	a	-0.353687	25.5585	2	0.164	0.180855	0.536	1	-0.19	-0.172832	0.464	657
rs110597477	18	48648276	FBXO17	dpr	a	-0.406682	32.3772	2	0.16	0.177828	0.606	1	-0.246	-0.228854	0.394	281
rs109046836	18	48693703	ENSBTAG00000054968-ENSBTAG00000053706	dpr	a	-0.337211	23.2061	2	0.151	0.168528	0.553	1	-0.186	-0.168683	0.447	912
rs210926829	18	48869465	PAK4	dpr	a	0.611167	64.3955	1	0.191	0.206443	0.688	2	-0.42	-0.404723	0.312	8
rs3423452768	18	48897136	PAK4	dpr	a	0.48475	39.246	1	0.346	0.363956	0.285	2	-0.138	-0.120794	0.715	117
rs110907606	18	49254459	EID2-ENSBTAG00000047030	dpr	a	-0.41826	31.2077	2	0.282	0.298979	0.326	1	-0.136	-0.119281	0.674	319
rs3423435395	18	49417728	ENSBTAG00000005261	dpr	a	0.395255	31.8866	1	0.187	0.204717	0.526	2	-0.208	-0.190537	0.474	297
rs41885365	18	49654929	AKT2	dpr	a	0.629837	41.939	1	0.0965	0.115218	0.847	2	-0.533	-0.514619	0.153	91
rs109244076	18	49690710	C18H19orf47	dpr	a	0.382898	29.6252	1	0.22	0.237362	0.426	2	-0.163	-0.145536	0.574	380
rs41635778	18	50004821	ITPKC	dpr	a	0.450566	36.7773	1	0.302	0.319958	0.33	2	-0.149	-0.130608	0.67	162
rs41635789	18	50109326	ENSBTAG00000054384	dpr	a	0.470802	33.7055	1	0.115	0.132935	0.755	2	-0.356	-0.337867	0.245	249
rs136954574	18	50173686	ENSBTAG00000054384-ENSBTAG00000003272	dpr	a	0.517691	53.0059	1	0.291	0.305146	0.439	2	-0.227	-0.212546	0.561	21
rs110954907	18	50187257	ENSBTAG00000054384	dpr	a	0.78594	50.117	1	0.0883	0.104434	0.888	2	-0.698	-0.681507	0.112	32
rs134801204	18	50232872	ENSBTAG00000054384-CYP2B39	dpr	a	-0.4969	48.5446	2	0.21	0.225941	0.578	1	-0.287	-0.270959	0.422	39
rs43122873	18	50252687	ENSBTAG00000054384	dpr	a	0.398941	24.7624	1	0.101	0.119475	0.748	2	-0.298	-0.279465	0.252	752
rs42692067	18	50284783	ENSBTAG00000054384	dpr	a	0.360889	25.2659	1	0.223	0.240665	0.382	2	-0.138	-0.120225	0.618	680
rs41579555	18	50412082	ENSBTAG00000054384-AXL	dpr	a	0.447149	26.3733	1	0.0896	0.105759	0.8	2	-0.358	-0.34139	0.2	596
rs110386041	18	50420308	ENSBTAG00000054384-AXL	dpr	a	-0.453799	26.4311	2	0.0878	0.106277	0.807	1	-0.366	-0.347523	0.193	592
rs136665959	18	50434128	ENSBTAG00000054384-AXL	dpr	a	0.40734	31.2563	1	0.156	0.166647	0.617	2	-0.251	-0.240693	0.383	316
rs110367180	18	50535377	ENSBTAG00000054384-EXOSC5	dpr	a	-0.476579	46.2974	2	0.258	0.274704	0.459	1	-0.219	-0.201875	0.541	61
rs136983198	18	50542183	ENSBTAG00000054384-BCKDHA	dpr	a	-0.520552	51.4356	2	0.196	0.212608	0.624	1	-0.325	-0.307944	0.376	27
rs109902967	18	50593033	ENSBTAG00000054384	dpr	a	0.370333	25.2325	1	0.124	0.141659	0.665	2	-0.246	-0.228674	0.335	684
BovineHD1800019760	18	50626421	ENSBTAG00000054384	dpr	a	-0.423995	36.4042	2	0.191	0.209095	0.548	1	-0.233	-0.2149	0.452	169
rs41887856	18	50846763	ENSBTAG00000050227	dpr	a	0.512177	46.8374	1	0.179	0.189858	0.651	2	-0.333	-0.322318	0.349	55
rs41887415	18	50898271	LIPE	dpr	a	-0.475039	43.8592	2	0.188	0.205531	0.604	1	-0.287	-0.269508	0.396	75
rs108962400	18	51040359	GSK3A	dpr	a	-0.522286	50.0399	2	0.345	0.36244	0.34	1	-0.178	-0.159846	0.66	33
rs41635776	18	51084210	DEDD2-POU2F2	dpr	a	-0.552084	61.0226	2	0.308	0.323687	0.442	1	-0.244	-0.228397	0.558	10
rs110682631	18	51107045	DEDD2-POU2F2	dpr	a	-0.551182	60.8169	2	0.307	0.324305	0.442	1	-0.244	-0.226877	0.558	12
rs133031305	18	51122041	DEDD2-POU2F2	dpr	a	-0.50198	32.8782	2	0.1	0.115565	0.8	1	-0.402	-0.386415	0.2	269
rs110850975	18	51181978	ZNF574-ENSBTAG00000054584	dpr	a	0.46275	34.5937	1	0.125	0.140637	0.731	2	-0.338	-0.322113	0.269	214
rs110953732	18	51368430	DMRTC2	dpr	a	-0.448315	39.769	2	0.187	0.201847	0.584	1	-0.262	-0.246469	0.416	114
rs111021838	18	51457300	ENSBTAG00000049346	dpr	a	-0.410251	34.3035	2	0.214	0.230221	0.478	1	-0.196	-0.18003	0.522	222
rs110809727	18	52062857	ZNF404	dpr	a	0.413405	35.0527	1	0.211	0.229386	0.488	2	-0.202	-0.184019	0.512	202
rs110571915	18	52090191	ZNF404-ZNF45	dpr	a	-0.394791	30.8472	2	0.162	0.180553	0.589	1	-0.233	-0.214238	0.411	332
rs110669538	18	52094939	ZNF45	dpr	a	-0.366154	26.8891	2	0.214	0.232129	0.415	1	-0.152	-0.134025	0.585	564
rs110234371	18	53287408	BHMG1	dpr	a	-0.42231	33.6229	2	0.261	0.27985	0.383	1	-0.162	-0.14246	0.617	252
rs41889240	18	53462716	NOVA2	dpr	a	-0.379063	29.4288	2	0.177	0.194898	0.533	1	-0.202	-0.184165	0.467	388
rs41636773	18	53538483	IGFL1-HIF3A	dpr	a	-0.427575	34.0894	2	0.278	0.293152	0.35	1	-0.149	-0.134424	0.65	232
rs109990351	18	53747257	CALM3-PTGIR	dpr	a	0.378227	24.9779	1	0.126	0.141737	0.666	2	-0.252	-0.236489	0.334	721
rs41892314	18	55339965	FUT2	dpr	a	-0.403143	27.8678	2	0.12	0.138336	0.703	1	-0.283	-0.264806	0.297	491
rs41890154	18	55405042	FGF21-BCAT2	dpr	a	0.348379	22.8947	1	0.159	0.183467	0.544	2	-0.19	-0.164913	0.456	949
rs41890224	18	55467515	PLEKHA4	dpr	a	-0.40214	27.7272	2	0.272	0.291139	0.323	1	-0.13	-0.111001	0.677	503
rs41891769	18	55611182	ENSBTAG00000048800	dpr	a	0.392081	29.9514	1	0.152	0.168139	0.613	2	-0.24	-0.223942	0.387	366
rs109767408	18	55631111	C18H19orf73	dpr	a	0.394269	27.8845	1	0.264	0.283283	0.33	2	-0.13	-0.110986	0.67	490
rs29015137	18	55667790	TRPM4	dpr	a	0.39353	29.4017	1	0.144	0.163176	0.634	2	-0.25	-0.230354	0.366	391
rs41890762	18	57362961	ENSBTAG00000048678-ENSBTAG00000038526	dpr	a	0.420745	35.4976	1	0.188	0.207633	0.553	2	-0.233	-0.213112	0.447	191
rs110486633	18	57399346	IGLON5	dpr	a	0.422038	35.0443	1	0.189	0.210437	0.552	2	-0.233	-0.211602	0.448	203
rs41890827	18	57445788	NKG7-LIM2	dpr	a	0.445101	33.0794	1	0.128	0.144236	0.712	2	-0.317	-0.300865	0.288	262
rs133325071	18	57496092	ENSBTAG00000008851-ENSBTAG00000047675	dpr	a	-0.424562	34.509	2	0.177	0.200796	0.583	1	-0.247	-0.223766	0.417	217
rs41892940	18	57576120	ENSBTAG00000045880	dpr	a	-0.418894	34.2804	2	0.255	0.273081	0.391	1	-0.164	-0.145813	0.609	224
rs134806140	18	57682137	ENSBTAG00000035868-MIR99B	dpr	a	-0.38443	29.23	2	0.225	0.244337	0.414	1	-0.159	-0.140093	0.586	399
rs110975301	18	57912164	LOC787309	dpr	a	-0.414289	24.5072	2	0.0984	0.121962	0.762	1	-0.316	-0.292327	0.238	764
rs3423436935	18	59715070	ENSBTAG00000021433-ENSBTAG00000054418	dpr	a	-0.620707	24.5514	2	0.0526	0.068499	0.915	1	-0.568	-0.552208	0.0847	760
rs135033267	18	59752260	ENSBTAG00000021433-ENSBTAG00000054418	dpr	a	0.632087	25.1803	1	0.0531	0.068397	0.916	2	-0.579	-0.56369	0.084	695
rs110805835	19	17653007	MYO1D	dpr	a	0.393548	23.4462	1	0.286	0.303772	0.274	2	-0.108	-0.089776	0.726	885
rs109475358	19	17803736	ZNF207-C19H17orf75	dpr	a	-0.383383	29.0885	2	0.157	0.175279	0.59	1	-0.226	-0.208105	0.41	413
rs134563684	19	17935227	RHOT1	dpr	a	0.409194	32.6822	1	0.196	0.212235	0.521	2	-0.213	-0.196959	0.479	276
rs136829395	19	18314541	COPRS-U2	dpr	a	-0.377274	28.3823	2	0.196	0.222559	0.481	1	-0.181	-0.154715	0.519	457
rs109191037	19	19348535	ENSBTAG00000046372-LGALS9	dpr	a	0.343385	23.466	1	0.141	0.158593	0.59	2	-0.203	-0.184792	0.41	882
rs132932114	19	21736086	ABR	dpr	a	-0.341378	23.0477	2	0.187	0.203029	0.454	1	-0.155	-0.13835	0.546	931
rs110032029	19	25973558	ENSBTAG00000050735-NLRP1	dpr	a	-0.636579	26.6327	2	0.0564	0.074348	0.911	1	-0.58	-0.562232	0.0886	571
rs41904669	19	27073319	TNK1	dpr	a	0.384782	23.4002	1	0.284	0.301636	0.261	2	-0.1	-0.083146	0.739	890
rs41904556	19	27316118	MPDU1	dpr	a	0.389864	24.0426	1	0.288	0.304618	0.261	2	-0.102	-0.085246	0.739	807
rs111004845	19	27355811	SHBG-ATP1B2	dpr	a	-0.503714	47.5685	2	0.322	0.339737	0.36	1	-0.182	-0.163978	0.64	46
rs110845473	19	27484633	DNAH2	dpr	a	-0.386439	23.3526	2	0.288	0.305784	0.255	1	-0.0984	-0.080655	0.745	894
rs109760470	19	27496286	DNAH2	dpr	a	0.367069	22.8439	1	0.106	0.124051	0.71	2	-0.261	-0.243018	0.29	955
rs135756393	19	28461579	NTN1	dpr	a	0.344389	22.8236	1	0.129	0.143932	0.625	2	-0.215	-0.200457	0.375	958
rs41642717	19	29376152	MYH13-ENSBTAG00000053276	dpr	a	-0.367213	26.0529	2	0.2	0.207987	0.456	1	-0.167	-0.159226	0.544	622
rs109561371	19	31194933	MYOCD-ARHGAP44	dpr	a	-0.39483	31.075	2	0.207	0.221506	0.476	1	-0.188	-0.173324	0.524	324
rs110401500	19	31252963	ARHGAP44	dpr	a	-0.422823	31.9212	2	0.289	0.306205	0.317	1	-0.134	-0.116618	0.683	296
rs41621822	19	31902307	LOC112442639	dpr	a	-0.345363	22.8918	2	0.219	0.236241	0.365	1	-0.126	-0.109121	0.635	950
rs133729181	19	32106657	COX10	dpr	a	0.373756	27.9996	1	0.218	0.235439	0.417	2	-0.156	-0.138317	0.583	486
rs41607280	19	32617629	HS3ST3B1-PMP22	dpr	a	-0.358449	24.789	2	0.133	0.150361	0.63	1	-0.226	-0.208088	0.37	743
rs109398281	19	33169313	ZNF287-LRRC75A	dpr	a	0.458736	40.8798	1	0.208	0.219909	0.546	2	-0.251	-0.238827	0.454	101
rs110034748	19	33169988	ZNF287-LRRC75A	dpr	a	-0.4589	40.9107	2	0.208	0.22	0.546	1	-0.251	-0.2389	0.454	99
rs110828490	19	33176350	LRRC75A	dpr	a	0.451801	40.1715	1	0.205	0.218825	0.546	2	-0.247	-0.232976	0.454	109
rs109599803	19	33207693	LRRC75A	dpr	a	0.350036	22.3927	1	0.115	0.131881	0.672	2	-0.235	-0.218155	0.328	998
rs110422703	19	33220038	TRPV2	dpr	a	0.386168	29.088	1	0.155	0.168259	0.599	2	-0.231	-0.217909	0.401	414
rs41257332	19	33443229	TTC19	dpr	a	-0.360675	24.8036	2	0.219	0.230266	0.392	1	-0.141	-0.130409	0.608	739
rs109212910	19	34640126	SREBF1	dpr	a	-0.346512	24.7642	2	0.171	0.188154	0.506	1	-0.175	-0.158358	0.494	751
rs41910760	19	34901820	COPS3	dpr	a	-0.380902	23.8323	2	0.105	0.122415	0.725	1	-0.276	-0.258487	0.275	842
rs41257257	19	35125080	USP22	dpr	a	-0.39284	28.5852	2	0.255	0.274016	0.351	1	-0.138	-0.118824	0.649	442
rs137038596	19	35279651	MAP2K3-KCNJ12	dpr	a	-0.355577	24.4745	2	0.219	0.237829	0.384	1	-0.136	-0.117748	0.616	770
rs42617560	19	35925135	WFIKKN2-ENSBTAG00000042852	dpr	a	0.340246	23.8304	1	0.166	0.185897	0.511	2	-0.174	-0.154349	0.489	843
rs109944441	20	25545122	NDUFS4-FST	dpr	a	-0.375603	23.9684	2	0.114	0.132697	0.695	1	-0.261	-0.242906	0.305	820
rs41938455	20	33341878	C6	dpr	a	-0.524595	24.5783	2	0.0647	0.082155	0.877	1	-0.46	-0.44244	0.123	759
rs137431035	20	33809571	LOC112443036	dpr	a	0.504321	24.5211	1	0.0681	0.086044	0.865	2	-0.436	-0.418277	0.135	761
rs3423475311	20	34025353	PTGER4(d)	dpr	a	-0.417471	25.455	2	0.321	0.338864	0.23	1	-0.0961	-0.078607	0.77	669
rs41938511	20	34066849	PTGER4(d)	dpr	a	-0.419174	25.7111	2	0.323	0.339952	0.231	1	-0.0966	-0.079222	0.769	645
rs111028447	20	34138855	PTGER4(d)	dpr	a	-0.421706	25.7869	2	0.325	0.34243	0.23	1	-0.0972	-0.079276	0.77	640
rs132668060	20	34201750	LOC104975271	dpr	a	-0.389278	23.0101	2	0.291	0.300714	0.253	1	-0.0985	-0.088564	0.747	936
rs134565335	20	34529834	U2(u)	dpr	a	-0.409729	26.2159	2	0.104	0.122635	0.746	1	-0.306	-0.287095	0.254	605
rs41942122	20	34603769	U2(u)	dpr	a	0.407131	26.1166	1	0.105	0.122223	0.743	2	-0.303	-0.284908	0.257	614
rs110311263	20	34631392	U2(u)	dpr	a	0.380015	23.0978	1	0.104	0.116757	0.726	2	-0.276	-0.263258	0.274	924
rs134271825	20	34635478	U2(u)	dpr	a	-0.38194	23.3633	2	0.105	0.117085	0.726	1	-0.277	-0.264855	0.274	893
rs29013890	20	34800041	U2(u)	dpr	a	-0.517802	27.7602	2	0.0766	0.091904	0.852	1	-0.441	-0.425898	0.148	498
rs43003261	20	37788255	SLC1A3-ENSBTAG00000054657	dpr	a	0.39429	27.6254	1	0.127	0.145485	0.678	2	-0.268	-0.248806	0.322	511
rs110515218	20	37811427	SLC1A3-ENSBTAG00000054657	dpr	a	-0.35216	23.9536	2	0.132	0.149732	0.625	1	-0.22	-0.202428	0.375	821
rs134750440	20	38969116	PRLR	dpr	a	-0.39465	23.5328	2	0.0953	0.113547	0.759	1	-0.299	-0.281103	0.241	875
rs41911863	20	39204868	DNAJC21	dpr	a	-0.416164	31.8148	2	0.141	0.157088	0.661	1	-0.275	-0.259076	0.339	300
rs42670220	20	39445232	RAI14	dpr	a	-0.391143	24.2751	2	0.101	0.119225	0.741	1	-0.29	-0.271919	0.259	788
rs137480500	20	39647895	RAI14-C1QTNF3	dpr	a	-0.421573	28.052	2	0.111	0.127414	0.737	1	-0.311	-0.294159	0.263	483
rs110831573	20	39722083	C1QTNF3	dpr	a	0.408068	30.0861	1	0.133	0.150427	0.674	2	-0.275	-0.257641	0.326	361
rs109269484	20	40261584	ADAMTS12	dpr	a	0.354332	24.0107	1	0.129	0.146528	0.635	2	-0.225	-0.207804	0.365	810
rs110378369	20	40650558	bta-mir-12058-ENSBTAG00000052313	dpr	a	0.435726	28.975	1	0.107	0.125018	0.755	2	-0.329	-0.310708	0.245	420
rs134602746	20	40765544	bta-mir-12058-ENSBTAG00000052313	dpr	a	0.485064	32.4177	1	0.104	0.122256	0.785	2	-0.381	-0.362808	0.215	280
rs42956084	20	40780300	bta-mir-12058-ENSBTAG00000052313	dpr	a	0.485752	32.8211	1	0.105	0.124833	0.783	2	-0.381	-0.36092	0.217	270
rs110389922	20	40806659	bta-mir-12058-ENSBTAG00000052313	dpr	a	-0.444653	25.6259	2	0.0874	0.107465	0.803	1	-0.357	-0.337188	0.197	651
rs137620674	20	40812558	bta-mir-12058-ENSBTAG00000052313	dpr	a	-0.391992	28.4064	2	0.138	0.152702	0.648	1	-0.254	-0.23929	0.352	455
rs136922488	20	40926479	NPR3	dpr	a	0.376045	25.9468	1	0.127	0.144412	0.663	2	-0.249	-0.231633	0.337	629
rs41942366	20	41041011	NPR3-SUB1	dpr	a	0.429341	29.0937	1	0.113	0.129446	0.737	2	-0.316	-0.299895	0.263	412
rs110163625	20	41348559	MTMR12	dpr	a	0.425474	24.667	1	0.0892	0.107785	0.79	2	-0.336	-0.317689	0.21	757
rs137605736	20	64598648	U6(d)	dpr	a	0.37226	25.4844	1	0.24	0.254414	0.356	2	-0.133	-0.117846	0.644	662
rs110642851	20	67885808	ADAMTS16	dpr	a	-0.399639	29.1775	2	0.256	0.273643	0.359	1	-0.143	-0.125996	0.641	404
rs41960341	20	68016636	ADAMTS16-ENSBTAG00000045462	dpr	a	-0.394328	31.2291	2	0.22	0.237919	0.443	1	-0.175	-0.156408	0.557	318
rs3423464207	20	69277811	IRX1(u)	dpr	a	0.35473	23.8556	1	0.224	0.241563	0.368	2	-0.131	-0.113167	0.632	837
rs109812042	20	69412384	ENSBTAG00000051384(d)	dpr	a	-0.398733	25.2255	2	0.294	0.313513	0.262	1	-0.104	-0.08522	0.738	686
rs42858444	20	69531887	ENSBTAG00000051384(d)	dpr	a	-0.366663	24.8495	2	0.232	0.244247	0.366	1	-0.134	-0.122415	0.634	735
rs41965837	20	69758571	ENSBTAG00000051384-ENSBTAG00000050065	dpr	a	-0.364704	25.737	2	0.217	0.233096	0.404	1	-0.147	-0.131608	0.596	643
rs43742770	20	70022970	ENSBTAG00000050065(u)	dpr	a	-0.390705	28.9672	2	0.244	0.258918	0.377	1	-0.147	-0.131786	0.623	421
rs134228636	20	70325181	ENSBTAG00000054006-5S-rRNA	dpr	a	0.372899	22.7513	1	0.27	0.288201	0.275	2	-0.103	-0.084698	0.725	967
rs110431300	21	8110759	PGPEP1L	dpr	a	-0.378323	24.9373	2	0.114	0.132475	0.698	1	-0.264	-0.245848	0.302	726
rs109561854	23	23991829	PKHD1(u)	dpr	a	0.365289	25.6373	1	0.207	0.22915	0.434	2	-0.159	-0.136139	0.566	650
rs110788100	23	23996897	PKHD1(u)	dpr	a	-0.35088	24.8879	2	0.199	0.217735	0.434	1	-0.152	-0.133145	0.566	730
rs3423507132	23	26556968	LOC104972343	dpr	a	-0.493892	46.4558	2	0.311	0.327849	0.371	1	-0.183	-0.166043	0.629	58
rs134189804	23	27242625	PRRT1-FKBPL	dpr	a	-0.354954	25.3698	2	0.168	0.188495	0.526	1	-0.187	-0.166459	0.474	676
rs135103353	23	27364859	ENSBTAG00000052577	dpr	a	-0.395266	27.285	2	0.123	0.143741	0.688	1	-0.272	-0.251525	0.312	538
rs134178964	23	27426589	C2	dpr	a	-0.412583	25.5394	2	0.101	0.12159	0.754	1	-0.311	-0.290993	0.246	658
rs132752691	23	27697748	NCR3	dpr	a	-0.427039	35.5297	2	0.26	0.279206	0.391	1	-0.167	-0.147834	0.609	188
rs41641274	23	28189617	DDR1	dpr	a	0.457149	25.0987	1	0.376	0.394117	0.177	2	-0.0809	-0.063032	0.823	708
rs41642123	23	28819912	TRIM10	dpr	a	-0.362495	24.7699	2	0.134	0.15387	0.63	1	-0.228	-0.208625	0.37	748
rs110215185	23	28830632	TRIM40	dpr	a	-0.378547	29.3299	2	0.198	0.215984	0.477	1	-0.18	-0.162563	0.523	393
rs110831737	23	30695018	LOC617979	dpr	a	-0.640074	39.0725	2	0.554	0.574325	0.135	1	-0.0863	-0.065749	0.865	120
rs43711373	23	30946459	LOC112443796	dpr	a	0.620543	33.4988	1	0.546	0.564054	0.12	2	-0.0744	-0.056489	0.88	255
rs110640803	23	30970645	H2BC14-H2AC14-H4C13	dpr	a	-0.577826	31.5161	2	0.501	0.519534	0.132	1	-0.0764	-0.058292	0.868	304
rs109932608	23	31163980	bta-mir-7857-2-ENSBTAG00000051743	dpr	a	-0.453578	23.3707	2	0.379	0.397715	0.164	1	-0.0744	-0.055863	0.836	892
rs108971189	23	32525100	CARMIL1	dpr	a	-0.367675	27.8278	2	0.179	0.19619	0.513	1	-0.189	-0.171485	0.487	493
rs134554852	23	32750001	LOC537017	dpr	a	-0.382123	25.7323	2	0.121	0.136653	0.683	1	-0.261	-0.24547	0.317	644
rs3423515918	23	32830480	RIPOR2	dpr	a	0.407964	26.6838	1	0.127	0.138737	0.688	2	-0.281	-0.269227	0.312	568
rs29015296	23	32969917	RIPOR2	dpr	a	-0.390794	31.2341	2	0.212	0.229876	0.458	1	-0.179	-0.160918	0.542	317
rs41617133	23	33109906	KIAA0319	dpr	a	-0.350469	22.6801	2	0.121	0.138271	0.656	1	-0.23	-0.212198	0.344	976
rs110742229	23	33153073	KIAA0319	dpr	a	0.361515	23.7539	1	0.134	0.146596	0.63	2	-0.228	-0.214919	0.37	850
rs41588598	23	35297329	CSH2	dpr	a	0.350957	25.1226	1	0.16	0.180037	0.545	2	-0.191	-0.17092	0.455	706
rs133378560	24	31786775	ZNF521-HRH4	dpr	a	0.348687	24.5161	1	0.19	0.203075	0.456	2	-0.159	-0.145612	0.544	762
rs109488800	26	32357489	GPAM(u)	dpr	a	0.364605	25.4844	1	0.136	0.154225	0.627	2	-0.229	-0.21038	0.373	663
rs29011138	26	36104043	ATRNL1	dpr	a	0.361557	22.3911	1	0.254	0.274008	0.297	2	-0.107	-0.087549	0.703	999
rs110280983	26	38480503	RAB11FIP2-FAM204A	dpr	a	-0.351065	24.0634	2	0.218	0.235707	0.379	1	-0.133	-0.115358	0.621	804
rs109799843	26	38948943	CACUL1	dpr	a	-0.370715	27.7003	2	0.216	0.234258	0.417	1	-0.155	-0.136457	0.583	508
rs110948651	26	39178218	CACUL1-ENSBTAG00000051003	dpr	a	-0.349892	24.8323	2	0.2	0.218892	0.427	1	-0.149	-0.131	0.573	736
rs109418314	26	40624758	PLPP4	dpr	a	0.344111	24.2912	1	0.165	0.183241	0.521	2	-0.179	-0.16087	0.479	787
rs109668828	26	41608152	FGFR2-ATE1	dpr	a	0.381692	23.6744	1	0.27	0.286355	0.292	2	-0.111	-0.095336	0.708	862
rs110171201	26	41805841	ATE1	dpr	a	-0.390169	26.2175	2	0.275	0.292308	0.296	1	-0.116	-0.097861	0.704	604
rs109839618	26	42030841	TACC2	dpr	a	0.369444	24.4393	1	0.252	0.269127	0.317	2	-0.117	-0.100317	0.683	774
rs137357048	26	43877138	ENSBTAG00000049849-OAT	dpr	a	0.391773	27.8108	1	0.256	0.272988	0.346	2	-0.135	-0.118785	0.654	494
rs108960987	26	44390824	ABRAXAS2	dpr	a	-0.432926	22.772	2	0.356	0.374112	0.179	1	-0.0774	-0.058814	0.821	966
rs133012502	26	45783215	ADAM12	dpr	a	-0.507513	26.9964	2	0.432	0.450553	0.149	1	-0.0758	-0.05696	0.851	557
'u’ indicates the SNP is upstream of the gene, and ‘d’ indicates the SNP is downstream of the gene.
‘effect’ is the additive effect of the SNP as the difference between allelic effects of ‘allele 1’ and ‘allele 2’ (Equation 10).
‘ae+’ is the allelic effect of the positive allele using Equation 9, and 'ae+2' the allelic effect of the positive allele using Equation 11
‘ae-’ is the allelic effect of the negative allele using Equation 9, and 'ae-2' is the allelic effect of the negative allele using Equation 11.
‘f_al+’ is the frequency of the positive allele. ‘f_al-’ is the requency of the negative allele.
