# Supplementary material for: A Million-Cow Genome-Wide Association Study of Three Fertility Traits in U.S. Holstein Cows
Source: Int J Mol Sci. 2023 Jun 22;24(13):10496. doi: 10.3390/ijms241310496 (PMC10341978; doi:10.3390/ijms241310496)
Supplement: Supplementary file 1 [file ijms-24-10496-s001.zip › Supplementary_materials/Table_S2.xlsx]

## Sheet: s2
SNP	Chr	position	Candidate gene	Trait	Test	Effect	log10(1/p)	DR	d_DR	f_DR	DD	d_DD	f_DD	RR	d_RR	f_RR	al+	ae+	f_al+	al-	ae-	f_al-	rank
rs41884737	18	43786051	CEBPG (u)	dpr	d	2.7834	59.2999	12	0.365	0.142	11	-0.03	0.852	22	-4.81	0.00548	1	0.0773	0.923	2	-0.933	0.0766	1
rs41885943	18	43854199	PEPD	dpr	d	2.64437	56.0873	12	0.355	0.145	11	-0.0299	0.849	22	-4.55	0.00576	1	0.0777	0.922	2	-0.912	0.0784	2
rs43746558	18	44167440	CHST8	dpr	d	2.83548	55.3582	12	0.366	0.139	11	-0.0294	0.856	22	-4.91	0.00525	1	0.0756	0.925	2	-0.936	0.0747	3
rs133443778	18	43887966	PEPD	dpr	d	2.67912	51.301	12	0.354	0.143	11	-0.0293	0.851	22	-4.62	0.00556	1	0.0745	0.923	2	-0.891	0.0772	4
rs42739334	6	102065812	KLHL8	dpr	d	1.95228	23.1322	12	0.235	0.123	11	-0.0164	0.873	22	-3.42	0.00422	1	0.04	0.934	2	-0.57	0.0655	5
rs109933750	6	102164971	U6-HSD17B13	dpr	d	1.94611	22.0022	12	0.226	0.121	22	-0.0156	0.875	11	-3.42	0.00402	2	0.0355	0.935	1	-0.514	0.0646	6
rs109622162	18	43936602	PEPD	dpr	d	0.956367	21.793	12	0.22	0.247	22	-0.0363	0.733	11	-1.44	0.0194	2	0.0849	0.857	1	-0.508	0.143	7
rs43768813	6	101887271	AFF1	dpr	d	1.94763	21.7593	12	0.227	0.119	22	-0.0154	0.877	11	-3.43	0.00396	2	0.0361	0.936	1	-0.531	0.0636	8
rs43480825	6	101994654	AFF1	dpr	d	1.7945	19.0726	12	0.21	0.122	11	-0.0146	0.874	22	-3.15	0.00409	1	0.037	0.935	2	-0.532	0.065	9
rs110940015	18	43876270	PEPD	dpr	d	0.719665	13.322	12	0.179	0.263	11	-0.0322	0.714	22	-1.05	0.023	1	0.0906	0.845	2	-0.495	0.155	10
rs109785425	9	48907179	GRIK2-ASCC3	dpr	d	0.819134	11.5855	12	0.161	0.215	11	-0.0221	0.771	22	-1.29	0.0136	1	0.0259	0.879	2	-0.188	0.121	11
rs110035804	1	68293671	CCDC14	dpr	d	1.64083	10.7634	12	0.17	0.0974	11	-0.00932	0.9	22	-2.93	0.00277	1	0.0561	0.949	2	-1.03	0.0515	12
rs43595191	9	49192024	ASCC3	dpr	d	0.768042	10.6408	12	0.153	0.216	22	-0.0212	0.77	11	-1.21	0.0138	2	0.0258	0.878	1	-0.186	0.122	13
rs132847403	1	68792344	KALRN	dpr	d	1.6437	10.5944	12	0.167	0.0954	11	-0.00896	0.902	22	-2.95	0.00265	1	0.0559	0.95	2	-1.05	0.0503	14
rs41601212	9	47610804	GRIK2(u)	dpr	d	0.838156	10.2721	12	0.148	0.195	11	-0.018	0.794	22	-1.36	0.0108	1	0.0296	0.891	2	-0.243	0.109	15
rs108998049	18	44128299	CHST8	dpr	d	0.482381	9.9422	12	0.152	0.325	22	-0.0383	0.635	11	-0.622	0.0404	2	0.113	0.797	1	-0.445	0.203	16
rs111023007	4	23542497	U6-ENSBTAG00000054772	dpr	d	1.23076	9.9414	12	0.137	0.139	11	-0.0108	0.856	22	-2.18	0.00447	1	0.0162	0.926	2	-0.203	0.074	17
rs109790791	1	69102381	KALRN	dpr	d	1.47887	9.4849	12	0.158	0.1	11	-0.00897	0.897	22	-2.63	0.00295	1	0.0573	0.947	2	-1.02	0.0531	18
rs137209107	1	68043046	MYLK	dpr	d	0.907934	9.0413	12	0.16	0.157	11	-0.0156	0.835	22	-1.48	0.00813	1	0.064	0.914	2	-0.676	0.0865	19
rs137814900	1	70735271	TFRC-ZDHHC19	dpr	d	1.1921	9.0244	12	0.154	0.121	11	-0.0108	0.875	22	-2.07	0.00441	1	0.0575	0.935	2	-0.828	0.0649	20
rs136594706	9	45362194	HACE1-ENSBTAG00000053858	dpr	d	0.781959	8.746	12	0.138	0.192	11	-0.0164	0.798	22	-1.27	0.0106	1	0.0264	0.894	2	-0.222	0.106	21
rs133559615	18	46545843	NPHS1	dpr	d	0.541831	8.1228	12	0.136	0.261	22	-0.0244	0.716	11	-0.787	0.0229	2	0.0713	0.846	1	-0.393	0.154	22
'u’ indicates the SNP is upstream of the gene, and ‘d’ indicates the SNP is downstream of the gene.
‘effect’ is the dominance effect of the SNP as the difference between the heterozygous dominance value and the average of the two homozygous dominance values (Equation 12).
‘d_DR’ is the dominance value of the heterozygous genotype with one dominant allele (D) and one recessive allele (R) (Equation 13).
‘DR’ is the heterozygous genotype with one dominant allele and one recessive allele.
‘d_DR’ is the dominance value of the heterozygous genotype with one dominant allele (D) and one recessive allele (R) (Equation 13).
‘DD’ is the homozygous genotype with two dominant alleles.
‘d_DD’ is the dominance value of the homozygous genotype with two dominant alleles (DD) (Equation 13).
‘RR’ is the homozygous genotype with two recessive alleles.
‘d_RR’ is the dominance value of the homozygous genotype with two recessive alleles (RR) (Equation 13).
‘f_DR’ is the frequency of the heterozygous genotype.
‘f_DD’ is the frequency of the homozygous genotype of the dominant allele.
‘f_RR’ is the frequency of the homozygous genotype of the recessive allele. ‘f_R’ is the frequency of the recessive allele.
‘ae+’ is the allelic effect of the positive allele using Equation 9.
‘ae-’ is the allelic effect of the negative allele using Equation 9.
‘f_al+’ is the frequency of the positive allele. ‘f_al-’ is the requency of the negative allele.
