# Supplementary material for: A Million-Cow Genome-Wide Association Study of Three Fertility Traits in U.S. Holstein Cows
Source: Int J Mol Sci. 2023 Jun 22;24(13):10496. doi: 10.3390/ijms241310496 (PMC10341978; doi:10.3390/ijms241310496)
Supplement: Supplementary file 1 [file ijms-24-10496-s001.zip › Supplementary_materials/Table_S3.xlsx]

## Sheet: s3
SNP	Chr	position	Candidate gene	Trait	Test	Effect	log10(1/p)	al+	ae+	ae+2	f_al+	al-	ae-	ae-2	f_al-	rank
rs110434046	6	87184768	GC-NPFFR2	ccr	a	-0.730869	44.0084	2	0.265	0.28957	0.638	1	-0.466	-0.4413	0.362	1
rs133284520	3	50439709	MTF2-DIPK1A	ccr	a	0.703954	43.5084	1	0.31	0.34175	0.559	2	-0.394	-0.3622	0.441	2
rs109034709	6	87316810	NPFFR2	ccr	a	-0.725835	43.4339	2	0.263	0.29077	0.638	1	-0.463	-0.43507	0.362	3
rs41884737	18	43786051	ENSBTAG00000049393-CEBPG	ccr	a	1.295	42.9829	1	0.1	0.12754	0.923	2	-1.19	-1.16745	0.0775	4
rs41885943	18	43854199	PEPD	ccr	a	1.26294	41.8548	1	0.1	0.12784	0.921	2	-1.16	-1.1351	0.0795	5
rs109118753	5	78228782	AMN1	ccr	a	-0.709245	41.2002	2	0.259	0.27934	0.634	1	-0.45	-0.4299	0.366	6
rs135167982	3	56800055	LOC101903905	ccr	a	0.716241	39.6483	1	0.227	0.25375	0.683	2	-0.489	-0.46249	0.317	7
rs43746558	18	44167440	CHST8	ccr	a	1.29606	39.3329	1	0.0981	0.1504	0.924	2	-1.2	-1.14566	0.0757	8
rs133601452	3	52560568	BARHL2(d)	ccr	a	0.731076	39.0347	1	0.211	0.2362	0.712	2	-0.52	-0.49487	0.288	9
rs41255962	1	141049132	7SK (d)	ccr	a	0.657774	38.1904	1	0.361	0.38915	0.451	2	-0.297	-0.26862	0.549	10
rs110355079	5	73204997	ISX(u)	ccr	a	-0.6565	37.907	2	0.34	0.3715	0.483	1	-0.317	-0.285	0.517	11
rs135673728	3	56635728	ENSBTAG00000052091-LMO4	ccr	a	-0.689884	37.8027	2	0.23	0.25694	0.666	1	-0.46	-0.43294	0.334	12
rs110859152	3	56772414	LOC101903905	ccr	a	0.698618	37.5767	1	0.221	0.25646	0.684	2	-0.478	-0.44216	0.316	13
rs110803736	5	74853402	MYH9-U6	ccr	a	0.648133	37.0469	1	0.288	0.31386	0.556	2	-0.361	-0.33427	0.444	14
rs29015114	3	49574985	ABCA4-GCLM	ccr	a	-0.662957	36.913	2	0.249	0.28408	0.625	1	-0.414	-0.37887	0.375	15
rs133443778	18	43887966	PEPD	ccr	a	1.23805	36.4253	1	0.0969	0.15157	0.922	2	-1.14	-1.08648	0.0782	16
rs109452259	6	87068809	GC-NPFFR2	ccr	a	0.642733	36.4214	1	0.274	0.30133	0.573	2	-0.368	-0.34141	0.427	17
rs134419770	3	56073652	ENSBTAG00000049274-ENSBTAG00000054817	ccr	a	-0.6451	36.2962	2	0.324	0.35521	0.498	1	-0.321	-0.28989	0.502	18
rs133023874	3	50750559	EVI5	ccr	a	-0.76585	36.2245	2	0.174	0.19897	0.773	1	-0.592	-0.56688	0.227	19
rs209567919	5	88442763	KCNJ8-LDHB	ccr	a	-0.745414	36.1006	2	0.182	0.21611	0.756	1	-0.563	-0.5293	0.244	20
rs110527224	6	86860291	SLC4A4-GC	ccr	a	-0.663115	35.9898	2	0.233	0.25983	0.648	1	-0.43	-0.40328	0.352	21
rs110380398	6	86877334	SLC4A4-GC	ccr	a	0.665023	35.9616	1	0.234	0.25877	0.648	2	-0.431	-0.40625	0.352	22
rs136983198	18	50542183	ENSBTAG00000054384-BCKDHA	ccr	a	-0.654616	35.8655	2	0.247	0.2794	0.623	1	-0.408	-0.37522	0.377	23
rs137147462	6	87153414	GC-NPFFR2	ccr	a	-0.636636	35.7953	2	0.292	0.31965	0.541	1	-0.344	-0.31699	0.459	24
rs108941866	1	143558129	SIK1-ENSBTAG00000052654	ccr	a	0.628954	34.9431	1	0.278	0.30603	0.558	2	-0.351	-0.32292	0.442	25
rs43574629	8	84045184	CENPP-OMD	ccr	a	0.665114	34.8893	1	0.218	0.24359	0.673	2	-0.447	-0.42152	0.327	26
rs41635776	18	51084210	DEDD2-POU2F2	ccr	a	-0.623563	34.4596	2	0.349	0.3744	0.441	1	-0.275	-0.24916	0.559	27
rs133923471	3	52705929	BARHL2(d)	ccr	a	-0.624779	34.4285	2	0.267	0.29368	0.572	1	-0.358	-0.33109	0.428	28
rs110718354	3	49549218	ABCA4-GCLM	ccr	a	-0.647256	34.2524	2	0.226	0.25222	0.651	1	-0.421	-0.39503	0.349	29
rs109370025	1	141611675	FAM3B	ccr	a	-0.626881	34.0723	2	0.255	0.28192	0.594	1	-0.372	-0.34497	0.406	30
rs110682631	18	51107045	DEDD2-POU2F2	ccr	a	-0.619511	34.0121	2	0.346	0.37378	0.441	1	-0.273	-0.24574	0.559	31
rs136334841	3	50424463	MTF2-DIPK1A	ccr	a	0.627069	33.5489	1	0.372	0.39903	0.407	2	-0.256	-0.22804	0.593	32
rs41590493	3	58482880	ZNHIT6-CCN1	ccr	a	-0.667167	33.3681	2	0.2	0.23099	0.701	1	-0.467	-0.43617	0.299	33
rs3423152277	3	49440030	ABCA4	ccr	a	-0.629401	33.3016	2	0.248	0.27602	0.606	1	-0.382	-0.35338	0.394	34
rs109141760	3	56224927	ENSBTAG00000049274-ENSBTAG00000054817	ccr	a	0.679225	33.2834	1	0.191	0.22373	0.718	2	-0.488	-0.45549	0.282	35
rs41594003	5	88025709	ST8SIA1	ccr	a	0.611311	33.2	1	0.316	0.342	0.484	2	-0.296	-0.26931	0.516	36
rs110891676	3	57147780	SELENOF	ccr	a	0.71199	32.8251	1	0.168	0.20202	0.764	2	-0.544	-0.50997	0.236	37
rs379667522	18	43594730	WDR88	ccr	a	0.703468	32.7215	1	0.171	0.19866	0.756	2	-0.532	-0.50481	0.244	38
rs41657135	1	136567103	ENSBTAG00000049758-ENSBTAG00000049044	ccr	a	0.605608	32.5788	1	0.27	0.29632	0.554	2	-0.336	-0.30929	0.446	39
rs208524162	3	57372560	ENSBTAG00000021501	ccr	a	0.708323	32.5493	1	0.167	0.19818	0.764	2	-0.541	-0.51015	0.236	40
rs108998049	18	44128299	CHST8	ccr	a	-0.746894	32.3243	2	0.152	0.18874	0.796	1	-0.595	-0.55815	0.204	41
rs109715185	3	53136752	ZNF326(u)	ccr	a	-0.610993	32.275	2	0.249	0.27592	0.593	1	-0.362	-0.33507	0.407	42
rs109760682	3	56820450	LMO4-SNORA62	ccr	a	0.704121	32.2408	1	0.167	0.19875	0.763	2	-0.537	-0.50537	0.237	43
rs136299358	9	71292789	RPS12-EYA4	ccr	a	0.671214	32.2154	1	0.182	0.21049	0.729	2	-0.489	-0.46072	0.271	44
rs29020505	3	57536054	LOC112446001	ccr	a	-0.703681	32.2058	2	0.167	0.19705	0.763	1	-0.537	-0.50663	0.237	45
rs137664040	6	86795926	SLC4A4	ccr	a	-0.609995	32.0108	2	0.259	0.29006	0.576	1	-0.351	-0.31993	0.424	46
rs43338539	6	86924174	SLC4A4-GC	ccr	a	0.616969	31.9907	1	0.387	0.41382	0.372	2	-0.23	-0.20315	0.628	47
rs29015745	3	50183719	CCDC18	ccr	a	-0.671822	31.9788	2	0.182	0.21483	0.729	1	-0.49	-0.45699	0.271	48
rs110210354	3	49367331	ARHGAP29-ABCA4	ccr	a	-0.613788	31.9435	2	0.248	0.27935	0.597	1	-0.366	-0.33444	0.403	49
rs109154635	5	72193524	LARGE1	ccr	a	-0.60008	31.9413	2	0.323	0.35099	0.462	1	-0.277	-0.24909	0.538	50
rs137138386	14	48355737	TRPS1(u)	ccr	a	0.679764	31.9227	1	0.178	0.203	0.739	2	-0.502	-0.47677	0.261	51
rs109452645	3	49615926	DNTTIP2	ccr	a	-0.696321	31.7003	2	0.167	0.19214	0.761	1	-0.53	-0.50418	0.239	52
rs41620111	14	48202902	U6-TRPS1	ccr	a	-0.651784	31.6407	2	0.19	0.21682	0.708	1	-0.461	-0.43497	0.292	53
rs41586699	1	143029010	PDE9A	ccr	a	-0.671954	31.5621	2	0.177	0.20361	0.736	1	-0.495	-0.46835	0.264	54
rs137085486	14	48719805	TRPS1	ccr	a	0.652241	31.2702	1	0.186	0.21166	0.714	2	-0.466	-0.44058	0.286	55
rs41885365	18	49654929	AKT2	ccr	a	0.819098	31.2458	1	0.125	0.15339	0.847	2	-0.694	-0.66571	0.153	56
rs110379081	18	48272264	RYR1	ccr	a	-0.594121	31.1864	2	0.255	0.28201	0.57	1	-0.339	-0.31211	0.43	57
rs43274059	1	137344320	ENSBTAG00000054801-ENSBTAG00000049430	ccr	a	-0.587804	31.1238	2	0.286	0.3116	0.514	1	-0.302	-0.2762	0.486	58
rs109813524	3	56570708	ENSBTAG00000054817-ENSBTAG00000052091	ccr	a	0.691923	31.0821	1	0.164	0.19305	0.764	2	-0.528	-0.49887	0.236	59
rs29017431	3	52452892	bta-mir-2285b-2-BARHL2	ccr	a	-0.727875	30.658	2	0.147	0.17278	0.798	1	-0.581	-0.5551	0.202	60
rs43278942	1	143055392	PDE9A-WDR4	ccr	a	-0.670444	30.5742	2	0.179	0.21505	0.732	1	-0.491	-0.4554	0.268	61
rs210926829	18	48869465	PAK4	ccr	a	0.632197	30.405	1	0.197	0.22862	0.689	2	-0.436	-0.40357	0.311	62
rs42384258	1	140271143	DSCAM	ccr	a	-0.59944	30.2382	2	0.368	0.39255	0.386	1	-0.231	-0.20689	0.614	63
rs110847699	3	49704431	BCAR3	ccr	a	-0.616748	30.2289	2	0.206	0.23791	0.665	1	-0.41	-0.37884	0.335	64
rs110893645	15	74101712	C15H11orf96-ACCSL	ccr	a	0.583345	30.1254	1	0.259	0.28689	0.557	2	-0.325	-0.29645	0.443	65
rs41255287	1	143807962	PDXK	ccr	a	0.599233	30.0738	1	0.25	0.28568	0.583	2	-0.349	-0.31356	0.417	66
rs134148750	14	38628644	ENSBTAG00000047574-HNF4G	ccr	a	-0.681417	29.8678	2	0.16	0.18512	0.766	1	-0.522	-0.4963	0.234	67
rs136711996	1	143781586	RRP1B-PDXK	ccr	a	0.596724	29.8425	1	0.249	0.28618	0.582	2	-0.348	-0.31055	0.418	68
rs134519027	5	80195322	LOC518980	ccr	a	0.591139	29.6081	1	0.244	0.26729	0.587	2	-0.347	-0.32385	0.413	69
rs110954907	18	50187257	ENSBTAG00000054384	ccr	a	0.910261	29.5957	1	0.102	0.13181	0.888	2	-0.808	-0.77845	0.112	70
rs3423223703	6	85144158	UGT2A1-SULT1B1	ccr	a	-0.6007	29.5197	2	0.22	0.24548	0.633	1	-0.38	-0.35522	0.367	71
rs109377247	6	85896097	LOC100848253	ccr	a	0.571108	29.4826	1	0.287	0.3138	0.498	2	-0.285	-0.25731	0.502	72
rs43275844	1	139828817	IGSF5	ccr	a	-0.636392	29.4738	2	0.457	0.48297	0.282	1	-0.179	-0.15343	0.718	73
rs109830248	3	50493829	MTF2-DIPK1A	ccr	a	-0.579453	29.4319	2	0.245	0.27081	0.578	1	-0.335	-0.30865	0.422	74
rs110940015	18	43876270	PEPD	ccr	a	0.811361	29.3232	1	0.127	0.17739	0.843	2	-0.684	-0.63397	0.157	75
rs3423401401	15	76347304	DGKZ	ccr	a	0.594452	29.3177	1	0.362	0.3852	0.391	2	-0.232	-0.20925	0.609	76
rs43082562	5	33451948	SLC38A4	ccr	a	0.584522	29.2527	1	0.251	0.29676	0.57	2	-0.333	-0.28776	0.43	77
rs110744833	5	88002628	ST8SIA1	ccr	a	0.582788	29.2526	1	0.348	0.37393	0.403	2	-0.235	-0.20886	0.597	78
rs110251588	3	58008113	COL24A1	ccr	a	-0.640362	29.1963	2	0.175	0.20192	0.727	1	-0.466	-0.43844	0.273	79
rs109645267	1	143124335	NDUFV3	ccr	a	-0.629436	29.193	2	0.181	0.21097	0.712	1	-0.448	-0.41846	0.288	80
rs42914660	1	138504840	MRPL3-NUDT16	ccr	a	-0.600537	29.1494	2	0.397	0.42289	0.34	1	-0.204	-0.17765	0.66	81
rs109363858	1	144030480	AGPAT3-TRAPPC10	ccr	a	-0.59093	29.068	2	0.252	0.28114	0.574	1	-0.339	-0.30979	0.426	82
rs3423507132	23	26556968	LOC104972343	ccr	a	-0.587275	28.8999	2	0.37	0.39788	0.37	1	-0.217	-0.18939	0.63	83
rs109033158	1	142066408	PRDM15	ccr	a	-0.642146	28.8913	2	0.472	0.49749	0.266	1	-0.171	-0.14466	0.734	84
rs109747205	9	76804356	ABRACL-HECA	ccr	a	0.656191	28.8662	1	0.162	0.18782	0.754	2	-0.495	-0.46837	0.246	85
rs132847403	1	68792344	KALRN	ccr	a	1.3003	28.8517	1	0.066	0.0933	0.949	2	-1.23	-1.20701	0.0507	86
rs109622162	18	43936602	PEPD	ccr	a	-0.80131	28.849	2	0.116	0.14311	0.855	1	-0.685	-0.6582	0.145	87
rs42140243	1	143093430	WDR4	ccr	a	0.651395	28.81	1	0.176	0.21262	0.73	2	-0.475	-0.43878	0.27	88
rs110270244	14	48285366	U6-TRPS1	ccr	a	0.708217	28.8088	1	0.143	0.16883	0.798	2	-0.565	-0.53939	0.202	89
BovineHD0500009895	5	33720853	ENSBTAG00000049143	ccr	a	0.574752	28.7182	1	0.275	0.32061	0.521	2	-0.3	-0.25414	0.479	90
rs110367180	18	50535377	ENSBTAG00000054384-EXOSC5	ccr	a	-0.564175	28.663	2	0.307	0.333	0.456	1	-0.257	-0.23117	0.544	91
rs110953732	18	51368430	DMRTC2	ccr	a	-0.573623	28.6517	2	0.239	0.26811	0.583	1	-0.334	-0.30551	0.417	92
rs136510285	3	57305215	SH3GLB1	ccr	a	-0.613108	28.5058	2	0.194	0.23419	0.684	1	-0.419	-0.37892	0.316	93
rs134342291	6	86964714	GC	ccr	a	0.614331	28.3983	1	0.429	0.45657	0.301	2	-0.185	-0.15776	0.699	94
rs135076663	5	79695157	TMTC1(u)	ccr	a	0.569426	28.3333	1	0.24	0.26411	0.579	2	-0.33	-0.30532	0.421	95
rs3423379381	14	38289002	PI15-CRISPLD1	ccr	a	0.715408	28.2036	1	0.135	0.16108	0.811	2	-0.58	-0.55433	0.189	96
rs109752822	5	68867288	C5H12orf75	ccr	a	0.603265	28.0355	1	0.19	0.2152	0.685	2	-0.413	-0.38807	0.315	97
rs110248625	3	53435391	LRRC8D	ccr	a	-0.668447	28.0232	2	0.15	0.17653	0.776	1	-0.518	-0.49192	0.224	98
rs136204043	15	74094835	C15H11orf96-ACCSL	ccr	a	0.578313	28.019	1	0.252	0.30619	0.565	2	-0.327	-0.27212	0.435	99
rs110355206	5	75715294	CYTH4	ccr	a	-0.628336	28.0083	2	0.172	0.19723	0.727	1	-0.457	-0.43111	0.273	100
rs110917097	3	57937017	COL24A1	ccr	a	0.606023	27.8887	1	0.182	0.20801	0.7	2	-0.424	-0.39801	0.3	101
rs109455756	1	143526075	SIK1-ENSBTAG00000052654	ccr	a	-0.575947	27.8742	2	0.363	0.39165	0.37	1	-0.213	-0.18429	0.63	102
rs109795387	5	88379767	ABCC9	ccr	a	0.573111	27.8068	1	0.238	0.27546	0.585	2	-0.335	-0.29765	0.415	103
rs42406616	5	88287852	ABCC9	ccr	a	0.738174	27.6865	1	0.126	0.15239	0.829	2	-0.612	-0.58579	0.171	104
rs134999186	3	57407535	LOC112446001	ccr	a	-0.612148	27.6188	2	0.179	0.21575	0.708	1	-0.433	-0.3964	0.292	105
rs43277247	1	142348994	UMODL1	ccr	a	-0.610383	27.5741	2	0.188	0.22423	0.692	1	-0.423	-0.38615	0.308	106
rs43439753	5	76806262	SYT10-PKP2	ccr	a	-0.571655	27.5341	2	0.218	0.24274	0.618	1	-0.353	-0.32891	0.382	107
rs135978971	9	71245136	RPS12-EYA4	ccr	a	0.642721	27.5291	1	0.162	0.19056	0.748	2	-0.48	-0.45216	0.252	108
rs29001782	6	83456813	ENSBTAG00000038648	ccr	a	0.56376	27.5271	1	0.224	0.25055	0.602	2	-0.339	-0.31321	0.398	109
rs41662471	9	72186135	SLC2A12	ccr	a	-0.663956	27.5022	2	0.147	0.17299	0.779	1	-0.517	-0.49097	0.221	110
rs110719592	8	84670248	WNK2	ccr	a	-0.624571	27.4588	2	0.166	0.19213	0.734	1	-0.459	-0.43244	0.266	111
rs42141315	1	143227118	CBS	ccr	a	-0.575641	27.4083	2	0.207	0.23481	0.64	1	-0.368	-0.34083	0.36	112
rs136954574	18	50173686	ENSBTAG00000054384-ENSBTAG00000003272	ccr	a	0.557826	27.2431	1	0.313	0.34271	0.438	2	-0.245	-0.21512	0.562	113
rs111025428	8	84625044	WNK2	ccr	a	-0.624753	27.2259	2	0.166	0.19046	0.734	1	-0.459	-0.43429	0.266	114
rs132959157	6	85115522	UGT2A1	ccr	a	-0.562225	27.124	2	0.232	0.26123	0.588	1	-0.331	-0.301	0.412	115
rs109949830	9	76740980	REPS1-ABRACL	ccr	a	0.654176	27.0756	1	0.155	0.17884	0.764	2	-0.5	-0.47534	0.236	116
rs42718239	5	88271840	ABCC9	ccr	a	0.580785	27.0345	1	0.384	0.41089	0.339	2	-0.197	-0.16989	0.661	117
rs42590589	14	38622008	ENSBTAG00000047574-HNF4G	ccr	a	-0.672276	27.0332	2	0.141	0.1672	0.79	1	-0.531	-0.50508	0.21	118
rs110951076	3	62157969	ADGRL2(u)	ccr	a	0.642885	26.9775	1	0.153	0.18288	0.761	2	-0.49	-0.46001	0.239	119
rs29027404	3	52106782	HFM1-ENSBTAG00000055150	ccr	a	-0.546986	26.9061	2	0.296	0.32193	0.46	1	-0.251	-0.22505	0.54	120
rs135581922	15	74165872	ACCSL	ccr	a	0.553683	26.8934	1	0.244	0.27809	0.559	2	-0.309	-0.27559	0.441	121
rs109784333	1	140164749	DSCAM	ccr	a	-0.600103	26.8681	2	0.424	0.4497	0.294	1	-0.177	-0.1504	0.706	122
rs43276439	1	141195303	LOC104970303	ccr	a	-0.547733	26.8541	2	0.262	0.2853	0.522	1	-0.286	-0.26243	0.478	123
rs133317002	5	76367511	SYT10	ccr	a	-0.573491	26.6972	2	0.205	0.23064	0.642	1	-0.368	-0.34285	0.358	124
rs3423364025	14	37343274	ENSBTAG00000048533-U6	ccr	a	-0.555662	26.677	2	0.249	0.2761	0.551	1	-0.306	-0.27956	0.449	125
rs109790791	1	69102381	KALRN	ccr	a	1.21621	26.5963	1	0.0651	0.09554	0.946	2	-1.15	-1.12066	0.0535	126
rs136212327	6	83470850	ENSBTAG00000038648	ccr	a	0.560661	26.5539	1	0.224	0.24921	0.601	2	-0.337	-0.31145	0.399	127
rs3423198064	5	68696282	WASHC4	ccr	a	0.5876	26.5356	1	0.192	0.21342	0.672	2	-0.395	-0.37418	0.328	128
rs110800062	6	83444767	GNRHR	ccr	a	0.563011	26.4695	1	0.224	0.25123	0.602	2	-0.339	-0.31178	0.398	129
BTB-00232546	5	76942872	PKP2(u)	ccr	a	-0.559811	26.418	2	0.209	0.23558	0.626	1	-0.351	-0.32423	0.374	130
rs110289032	6	85067620	ENSBTAG00000015047-UGT2A1	ccr	a	-0.546875	26.3425	2	0.225	0.25128	0.589	1	-0.322	-0.2956	0.411	131
rs3423457479	18	48305042	RYR1	ccr	a	0.67886	26.2478	1	0.145	0.17723	0.787	2	-0.534	-0.50163	0.213	132
rs136043728	3	60644014	TTLL7-ENSBTAG00000050554	ccr	a	0.59006	26.1952	1	0.175	0.20247	0.703	2	-0.415	-0.38759	0.297	133
rs41639207	1	142168313	C2CD2	ccr	a	-0.555458	26.0866	2	0.209	0.23584	0.624	1	-0.346	-0.31962	0.376	134
rs109644955	15	75401438	SYT13-ENSBTAG00000050592	ccr	a	-0.540633	26.0799	2	0.299	0.3258	0.447	1	-0.242	-0.21483	0.553	135
rs108962400	18	51040359	GSK3A	ccr	a	-0.566153	25.9946	2	0.375	0.4011	0.338	1	-0.191	-0.16505	0.662	136
rs43272864	1	134840582	ANAPC13	ccr	a	-0.543972	25.9935	2	0.316	0.34048	0.419	1	-0.228	-0.20349	0.581	137
rs110588479	3	60094119	PRKACB-TTLL7	ccr	a	0.638593	25.9933	1	0.159	0.18129	0.751	2	-0.48	-0.4573	0.249	138
rs135084997	18	44221413	KCTD15-ENSBTAG00000050669	ccr	a	0.540795	25.9875	1	0.23	0.25679	0.574	2	-0.311	-0.284	0.426	139
rs43279718	1	140376046	DSCAM	ccr	a	0.536939	25.9616	1	0.269	0.29505	0.499	2	-0.268	-0.24189	0.501	140
rs109231721	5	68858474	ENSBTAG00000050973	ccr	a	-0.577504	25.9263	2	0.19	0.20716	0.671	1	-0.388	-0.37035	0.329	141
rs110790629	9	71522663	EYA4	ccr	a	-0.550812	25.9168	2	0.208	0.23516	0.623	1	-0.343	-0.31565	0.377	142
rs134370176	14	33633860	SLCO5A1	ccr	a	-0.574555	25.9077	2	0.184	0.20864	0.681	1	-0.391	-0.36592	0.319	143
rs41913235	14	48226688	U6-TRPS1	ccr	a	-0.614916	25.9044	2	0.16	0.18723	0.74	1	-0.455	-0.42769	0.26	144
rs108997449	1	142329853	UMODL1	ccr	a	-0.594041	25.8834	2	0.168	0.19462	0.716	1	-0.426	-0.39942	0.284	145
rs134302717	3	45464366	DPYD	ccr	a	0.564682	25.8578	1	0.205	0.2435	0.637	2	-0.36	-0.32118	0.363	146
rs3423353290	14	37371702	LOC112449517	ccr	a	-0.536836	25.8524	2	0.257	0.28646	0.522	1	-0.28	-0.25038	0.478	147
rs41782203	15	76586569	ATG13	ccr	a	-0.576789	25.6545	2	0.39	0.41384	0.323	1	-0.186	-0.16295	0.677	148
rs109436139	14	40194438	PEX2-ENSBTAG00000032831	ccr	a	0.608143	25.624	1	0.159	0.18568	0.739	2	-0.45	-0.42247	0.261	149
rs136632421	9	76217515	NHSL1	ccr	a	-0.549612	25.5754	2	0.218	0.24208	0.603	1	-0.332	-0.30753	0.397	150
rs41594926	8	84402125	FGD3	ccr	a	0.821238	25.3873	1	0.0979	0.12658	0.881	2	-0.723	-0.69466	0.119	151
rs109788394	1	139184646	ENSBTAG00000050167-PSMG1	ccr	a	-0.564905	25.3073	2	0.379	0.40555	0.329	1	-0.186	-0.15935	0.671	152
rs109456977	9	76084442	ARFGEF3	ccr	a	0.553783	25.177	1	0.207	0.23373	0.626	2	-0.347	-0.32005	0.374	153
rs109418628	1	141915687	ENSBTAG00000046015-RIPK4	ccr	a	0.588876	25.1718	1	0.424	0.44815	0.28	2	-0.165	-0.14073	0.72	154
rs109175233	5	74987687	CACNG2	ccr	a	0.581121	25.0938	1	0.17	0.19635	0.707	2	-0.411	-0.38477	0.293	155
rs41635789	18	50109326	ENSBTAG00000054384	ccr	a	0.610345	25.0938	1	0.15	0.17682	0.753	2	-0.46	-0.43353	0.247	156
rs134560532	5	92922775	LMO3(u)	ccr	a	0.668202	25.0843	1	0.131	0.16033	0.804	2	-0.537	-0.50787	0.196	157
rs42737642	8	84297085	BICD2	ccr	a	0.813525	25.0686	1	0.0972	0.12497	0.881	2	-0.716	-0.68855	0.119	158
rs208464932	3	48660453	SLC44A3	ccr	a	0.668899	25.0191	1	0.131	0.16414	0.804	2	-0.538	-0.50476	0.196	159
rs3423410647	15	76783337	CKAP5-LRP4	ccr	a	-0.590187	25.0128	2	0.427	0.45019	0.277	1	-0.163	-0.14	0.723	160
rs134873849	18	44380074	ENSBTAG00000050669	ccr	a	-0.668436	24.9914	2	0.128	0.15501	0.809	1	-0.541	-0.51343	0.191	161
rs137830740	5	87977330	ST8SIA1	ccr	a	0.529885	24.9678	1	0.285	0.31016	0.463	2	-0.245	-0.21973	0.537	162
rs135741190	14	34740292	ENSBTAG00000043212-EYA1	ccr	a	-0.614923	24.9459	2	0.149	0.17803	0.757	1	-0.466	-0.43689	0.243	163
rs3423367206	14	37284034	LY96-ENSBTAG00000054912	ccr	a	-0.537204	24.9425	2	0.291	0.31932	0.459	1	-0.247	-0.21789	0.541	164
rs136935959	5	74245072	RBFOX2-ENSBTAG00000046392	ccr	a	-0.548152	24.9396	2	0.343	0.36794	0.374	1	-0.205	-0.18021	0.626	165
rs137210372	3	46130462	DPYD	ccr	a	-0.561515	24.9375	2	0.189	0.22055	0.663	1	-0.372	-0.34096	0.337	166
rs41652632	5	80235852	ERGIC2	ccr	a	-0.542701	24.9096	2	0.207	0.23305	0.619	1	-0.336	-0.30966	0.381	167
rs41612498	14	41197278	U6-ENSBTAG00000050099	ccr	a	-0.597658	24.8976	2	0.156	0.18199	0.74	1	-0.442	-0.41567	0.26	168
ARS-BFGL-BAC-25329	14	39206142	HNF4G-U6	ccr	a	-0.657705	24.8273	2	0.13	0.15667	0.802	1	-0.527	-0.50104	0.198	169
rs41897673	1	111868602	SLC33A1-C1H3orf33	ccr	a	-0.565002	24.8268	2	0.179	0.20613	0.684	1	-0.386	-0.35887	0.316	170
rs3423379475	14	38572427	ENSBTAG00000047574-HNF4G	ccr	a	-0.663487	24.8042	2	0.129	0.15518	0.806	1	-0.535	-0.5083	0.194	171
rs134500893	1	137073760	DNAJC13	ccr	a	0.540621	24.7836	1	0.331	0.35203	0.388	2	-0.21	-0.18859	0.612	172
rs41622614	14	42191184	IL7-ENSBTAG00000042141	ccr	a	-0.554438	24.7781	2	0.186	0.21188	0.665	1	-0.369	-0.34256	0.335	173
rs41617802	14	34727883	ENSBTAG00000043212-EYA1	ccr	a	-0.615874	24.768	2	0.146	0.17255	0.763	1	-0.47	-0.44333	0.237	174
rs109830365	9	71565043	EYA4	ccr	a	0.538957	24.7665	1	0.202	0.22791	0.626	2	-0.337	-0.31104	0.374	175
rs110752781	8	84212707	IPPK	ccr	a	0.820011	24.7535	1	0.0953	0.12328	0.884	2	-0.725	-0.69673	0.116	176
rs133603335	11	86719277	LOC112448829	ccr	a	-0.708431	24.7406	2	0.591	0.62489	0.165	1	-0.117	-0.08354	0.835	177
rs110401873	5	79810464	TMTC1	ccr	a	-0.538658	24.7254	2	0.209	0.23559	0.612	1	-0.33	-0.30307	0.388	178
rs136312021	1	139248003	BRWD1	ccr	a	-0.56976	24.7188	2	0.395	0.4205	0.306	1	-0.174	-0.14926	0.694	179
rs41587051	8	84050346	CENPP-OMD	ccr	a	0.818572	24.6952	1	0.0952	0.12478	0.884	2	-0.723	-0.69379	0.116	180
rs110277498	1	139455671	GET1	ccr	a	-0.527119	24.6947	2	0.298	0.32426	0.435	1	-0.229	-0.20286	0.565	181
rs135518292	5	91048519	PLEKHA5-CAPZA3	ccr	a	-0.621214	24.6205	2	0.143	0.17016	0.77	1	-0.478	-0.45105	0.23	182
rs134228522	5	87932859	ST8SIA1	ccr	a	0.704908	24.586	1	0.127	0.15866	0.82	2	-0.578	-0.54624	0.18	183
rs109713461	9	74996230	IL20RA	ccr	a	0.585468	24.5742	1	0.159	0.18485	0.728	2	-0.426	-0.40062	0.272	184
rs110889714	5	74261181	LOC521214	ccr	a	-0.524059	24.5592	2	0.261	0.28639	0.503	1	-0.263	-0.23767	0.497	185
rs111004845	19	27355811	SHBG-ATP1B2	ccr	a	-0.542857	24.4992	2	0.348	0.37421	0.36	1	-0.195	-0.16864	0.64	186
rs110641445	5	33495314	SLC38A4-ENSBTAG00000049143	ccr	a	0.522282	24.4674	1	0.237	0.26393	0.546	2	-0.285	-0.25835	0.454	187
rs137814900	1	70735271	TFRC-ZDHHC19	ccr	a	1.05685	24.4232	1	0.0695	0.09876	0.934	2	-0.987	-0.95809	0.0658	188
rs42607539	6	89695966	BTC	ccr	a	0.554796	24.3913	1	0.185	0.21066	0.667	2	-0.37	-0.34414	0.333	189
rs3423094246	14	37741020	GDAP1-PI15	ccr	a	0.562443	24.3904	1	0.174	0.20491	0.69	2	-0.388	-0.35754	0.31	190
rs3423094080	14	37262411	LY96	ccr	a	-0.52359	24.3891	2	0.285	0.31181	0.456	1	-0.239	-0.21178	0.544	191
rs42905166	18	43597221	WDR88-LRP3	ccr	a	0.517469	24.3871	1	0.27	0.29585	0.479	2	-0.248	-0.22162	0.521	192
rs42773532	6	89736709	BTC-PARM1	ccr	a	-0.549343	24.3774	2	0.185	0.2118	0.662	1	-0.364	-0.33754	0.338	193
rs137319846	14	38584384	ENSBTAG00000047574-HNF4G	ccr	a	0.521884	24.2995	1	0.249	0.26946	0.523	2	-0.273	-0.25242	0.477	194
rs109901151	6	86762457	SLC4A4	ccr	a	-0.520858	24.2859	2	0.236	0.26177	0.547	1	-0.285	-0.25909	0.453	195
rs110302643	5	90254355	5S-rRNA-ENSBTAG00000054482	ccr	a	-0.517831	24.2828	2	0.246	0.27292	0.525	1	-0.272	-0.24491	0.475	196
rs110236886	14	33650257	SLCO5A1-PRDM14	ccr	a	0.560862	24.2526	1	0.174	0.19958	0.69	2	-0.387	-0.36129	0.31	197
rs42402812	15	62377899	ELP4	ccr	a	0.56066	24.238	1	0.387	0.41272	0.309	2	-0.173	-0.14794	0.691	198
rs41618766	11	85810220	ENSBTAG00000044370-LPIN1	ccr	a	-0.532674	24.2207	2	0.329	0.35485	0.383	1	-0.204	-0.17783	0.617	199
rs42767507	6	87101644	GC-NPFFR2	ccr	a	-0.53026	24.1991	2	0.316	0.34047	0.403	1	-0.214	-0.18979	0.597	200
ARS-BFGL-NGS-14315	15	75326304	SYT13	ccr	a	0.547184	24.1955	1	0.359	0.38605	0.344	2	-0.188	-0.16114	0.656	201
rs137429782	5	71008379	ASCL4	ccr	a	-0.541936	24.1615	2	0.2	0.218	0.631	1	-0.342	-0.32393	0.369	202
rs110524506	14	41340996	U6-ENSBTAG00000050099	ccr	a	-0.584096	24.131	2	0.156	0.18306	0.734	1	-0.429	-0.40103	0.266	203
rs109972395	18	47886323	SIPA1L3	ccr	a	-0.623922	24.1073	2	0.142	0.17675	0.773	1	-0.482	-0.44717	0.227	204
rs110703562	3	53499168	ENSBTAG00000050182	ccr	a	0.520526	24.049	1	0.23	0.25783	0.559	2	-0.291	-0.26269	0.441	205
rs41781201	15	74148912	C15H11orf96-ACCSL	ccr	a	-0.534753	24.0408	2	0.301	0.35609	0.437	1	-0.234	-0.17866	0.563	206
rs41594180	9	75961341	PERP-ARFGEF3	ccr	a	-0.567254	24.0082	2	0.168	0.19319	0.703	1	-0.399	-0.37406	0.297	207
rs137302420	6	86751807	SLC4A4	ccr	a	0.526784	24.0057	1	0.239	0.26444	0.546	2	-0.288	-0.26234	0.454	208
rs109512265	6	86753255	SLC4A4	ccr	a	-0.526083	23.9586	2	0.239	0.26353	0.546	1	-0.287	-0.26256	0.454	209
rs109271753	9	72923043	ENSBTAG00000054673-5S-rRNA	ccr	a	0.624078	23.9243	1	0.136	0.16259	0.782	2	-0.488	-0.46149	0.218	210
rs41579566	5	92415826	5S-rRNA(d)	ccr	a	0.611862	23.9065	1	0.142	0.16941	0.768	2	-0.47	-0.44245	0.232	211
rs110953922	6	86755896	SLC4A4	ccr	a	-0.525228	23.8836	2	0.238	0.26424	0.546	1	-0.287	-0.26099	0.454	212
rs110809727	18	52062857	ZNF404	ccr	a	0.513249	23.8353	1	0.264	0.29066	0.486	2	-0.25	-0.22259	0.514	213
rs136086227	5	84643734	ENSBTAG00000050678-KRAS	ccr	a	0.84126	23.779	1	0.0889	0.11972	0.894	2	-0.752	-0.72154	0.106	214
rs134340793	1	142813067	SLC37A1	ccr	a	-0.571565	23.773	2	0.402	0.44257	0.296	1	-0.169	-0.129	0.704	215
rs110901772	10	60986053	GALK2	ccr	a	-0.513086	23.7268	2	0.249	0.2758	0.514	1	-0.264	-0.23729	0.486	216
rs3423093251	14	37340881	ENSBTAG00000048533-U6	ccr	a	0.522049	23.6539	1	0.211	0.23893	0.596	2	-0.311	-0.28311	0.404	217
rs135226937	15	78347690	OR4A2M-OR4A2B	ccr	a	-0.516089	23.6106	2	0.238	0.26747	0.539	1	-0.278	-0.24862	0.461	218
rs42482493	3	62505120	ADGRL2	ccr	a	-0.537384	23.6051	2	0.186	0.21392	0.653	1	-0.351	-0.32346	0.347	219
rs43476286	6	90847159	SDAD1-CXCL9	ccr	a	0.529906	23.5939	1	0.206	0.22377	0.612	2	-0.324	-0.30614	0.388	220
rs41663466	9	73009507	ALDH8A1-HBS1L	ccr	a	0.619812	23.5813	1	0.135	0.16413	0.782	2	-0.485	-0.45569	0.218	221
rs43611067	1	136734614	ENSBTAG00000049529-NPHP3	ccr	a	-0.530833	23.5514	2	0.193	0.21722	0.637	1	-0.338	-0.31362	0.363	222
rs136350888	8	82955370	ENSBTAG00000053599-HSD17B3	ccr	a	0.80287	23.544	1	0.097	0.13335	0.879	2	-0.706	-0.66952	0.121	223
rs42766480	6	87156735	GC-NPFFR2	ccr	a	0.511434	23.5266	1	0.264	0.29081	0.483	2	-0.247	-0.22063	0.517	224
rs135739009	1	137008061	ACAD11	ccr	a	-0.519317	23.477	2	0.306	0.32961	0.411	1	-0.213	-0.18971	0.589	225
rs3423367392	14	37605589	JPH1-GDAP1	ccr	a	-0.654804	23.4675	2	0.123	0.15081	0.813	1	-0.532	-0.50399	0.187	226
rs43477009	6	90821649	SDAD1	ccr	a	-0.52814	23.4391	2	0.205	0.2241	0.612	1	-0.323	-0.30404	0.388	227
rs110900734	15	77233229	LOC107133473	ccr	a	-0.592317	23.4278	2	0.446	0.47006	0.247	1	-0.146	-0.12225	0.753	228
rs135562883	15	74140680	C15H11orf96-ACCSL	ccr	a	0.52631	23.3483	1	0.222	0.26473	0.579	2	-0.305	-0.26158	0.421	229
rs109979535	15	78181890	ENSBTAG00000055009	ccr	a	-0.509755	23.3418	2	0.242	0.27274	0.525	1	-0.268	-0.23702	0.475	230
rs110270703	6	85844689	ENSBTAG00000007816-ENSBTAG00000048522	ccr	a	-0.521822	23.2971	2	0.2	0.22743	0.616	1	-0.322	-0.2944	0.384	231
rs110035804	1	68293671	CCDC14	ccr	a	1.16507	23.2736	1	0.0606	0.07845	0.948	2	-1.1	-1.08661	0.052	232
rs109503857	5	74236870	RBFOX2-ENSBTAG00000046392	ccr	a	0.509696	23.2678	1	0.25	0.27666	0.51	2	-0.26	-0.23304	0.49	233
rs135308890	3	52442363	bta-mir-2285b-2-BARHL2	ccr	a	0.545265	23.2358	1	0.179	0.20285	0.672	2	-0.367	-0.34242	0.328	234
rs110433742	9	73722129	5S-rRNA-ENSBTAG00000051219	ccr	a	0.634647	23.2306	1	0.126	0.15337	0.801	2	-0.508	-0.48127	0.199	235
rs109892162	15	77255192	PSMC3	ccr	a	-0.58464	23.2137	2	0.437	0.46055	0.253	1	-0.148	-0.12409	0.747	236
rs3423353740	14	38337649	CRISPLD1	ccr	a	-0.511769	23.1728	2	0.267	0.29071	0.478	1	-0.244	-0.22106	0.522	237
rs109272208	1	134475334	EPHB1	ccr	a	-0.507352	23.1456	2	0.241	0.26745	0.525	1	-0.266	-0.2399	0.475	238
rs110147189	5	78338501	ETFBKMT-U6	ccr	a	-0.513904	23.0778	2	0.215	0.24292	0.581	1	-0.299	-0.27099	0.419	239
rs109593093	1	142753326	UBASH3A-RSPH1	ccr	a	-0.558484	23.0723	2	0.397	0.42609	0.289	1	-0.161	-0.13239	0.711	240
rs109816575	9	73828781	ENSBTAG00000051219	ccr	a	-0.638484	23.0534	2	0.124	0.14965	0.806	1	-0.515	-0.48883	0.194	241
rs133444626	5	74639822	ENSBTAG00000012192-APOL3	ccr	a	-0.507279	23.0472	2	0.25	0.27659	0.507	1	-0.257	-0.23068	0.493	242
rs109351097	9	76900024	HECA-TXLNB	ccr	a	0.578011	23.0464	1	0.155	0.18455	0.732	2	-0.423	-0.39347	0.268	243
rs41620554	11	88617471	LOC101905845	ccr	a	0.630181	22.9965	1	0.504	0.53317	0.201	2	-0.126	-0.09701	0.799	244
rs109287020	6	85918679	LOC112447096	ccr	a	-0.573496	22.9661	2	0.413	0.43979	0.279	1	-0.16	-0.13371	0.721	245
rs110352004	6	87213962	GC-NPFFR2	ccr	a	-0.507678	22.9518	2	0.229	0.25358	0.549	1	-0.279	-0.2541	0.451	246
rs109116362	10	67183570	SAMD4A	ccr	a	-0.504513	22.9394	2	0.261	0.28823	0.484	1	-0.244	-0.21629	0.516	247
rs135533165	5	74390205	ENSBTAG00000055135-ENSBTAG00000053500	ccr	a	-0.520607	22.9183	2	0.319	0.33913	0.387	1	-0.202	-0.18148	0.613	248
rs109431991	14	42286395	IL7-ENSBTAG00000042141	ccr	a	-0.583095	22.9016	2	0.145	0.17144	0.751	1	-0.438	-0.41166	0.249	249
rs109737775	14	50918264	CSMD3-CSMD3	ccr	a	-0.672271	22.9001	2	0.114	0.13775	0.83	1	-0.558	-0.53452	0.17	250
rs109112702	10	60440273	LOC112448487	ccr	a	-0.512947	22.8468	2	0.219	0.24532	0.572	1	-0.294	-0.26763	0.428	251
rs43708432	5	92527188	5S-rRNA(d)	ccr	a	-0.616983	22.8446	2	0.131	0.15688	0.787	1	-0.486	-0.4601	0.213	252
rs110500404	10	68164248	KTN1-ENSBTAG00000049100	ccr	a	0.502902	22.818	1	0.241	0.26734	0.521	2	-0.262	-0.23556	0.479	253
rs42578484	1	137177065	DNAJC13	ccr	a	0.549724	22.7891	1	0.386	0.41297	0.298	2	-0.164	-0.13676	0.702	254
rs132647549	11	86147235	LPIN1	ccr	a	-0.6599	22.7612	2	0.536	0.58615	0.188	1	-0.124	-0.07375	0.812	255
rs3423158060	3	57762632	ODF2L-ENSBTAG00000053371	ccr	a	0.506946	22.761	1	0.218	0.24512	0.569	2	-0.289	-0.26183	0.431	256
rs136875114	1	130963070	DBR1-A4GNT	ccr	a	0.721291	22.7562	1	0.102	0.13162	0.858	2	-0.619	-0.58967	0.142	257
rs110009880	1	135892805	CDV3-U8	ccr	a	0.572178	22.7278	1	0.15	0.17657	0.739	2	-0.423	-0.39561	0.261	258
rs380408824	8	83729214	ENSBTAG00000009764	ccr	a	0.787464	22.6646	1	0.0899	0.11699	0.886	2	-0.698	-0.67047	0.114	259
rs134140171	9	70321766	MOXD1	ccr	a	-0.780532	22.6428	2	0.0911	0.1181	0.883	1	-0.689	-0.66244	0.117	260
rs109625116	1	141628781	MX2	ccr	a	0.542026	22.6352	1	0.179	0.21603	0.669	2	-0.363	-0.326	0.331	261
rs43263793	1	121708616	U2-PLSCR5	ccr	a	-0.526219	22.6082	2	0.317	0.34881	0.397	1	-0.209	-0.17741	0.603	262
rs41729073	14	46418593	EXT1	ccr	a	-0.541925	22.5916	2	0.166	0.19235	0.694	1	-0.376	-0.34957	0.306	263
rs109036919	6	82600802	blank	ccr	a	-0.511761	22.5806	2	0.304	0.33463	0.406	1	-0.208	-0.17713	0.594	264
rs132752691	23	27697748	NCR3	ccr	a	-0.513083	22.5552	2	0.313	0.34603	0.391	1	-0.2	-0.16705	0.609	265
rs110045325	5	79910151	TMTC1	ccr	a	-0.53424	22.5433	2	0.18	0.20324	0.664	1	-0.355	-0.33099	0.336	266
rs136973874	9	77054960	U5(d)	ccr	a	0.523932	22.542	1	0.195	0.22311	0.627	2	-0.329	-0.30082	0.373	267
rs110931184	3	53158842	ZNF326(u)	ccr	a	-0.50393	22.5295	2	0.283	0.31237	0.438	1	-0.221	-0.19156	0.562	268
rs41616137	5	84547721	LMNTD1-ENSBTAG00000055210	ccr	a	0.684022	22.523	1	0.109	0.13512	0.84	2	-0.575	-0.5489	0.16	269
rs110176382	3	56711353	LMO4	ccr	a	0.509198	22.4727	1	0.232	0.26188	0.544	2	-0.277	-0.24732	0.456	270
rs109522440	14	43883320	ZNF704	ccr	a	0.574926	22.4706	1	0.149	0.16905	0.741	2	-0.426	-0.40587	0.259	271
rs3423289905	9	77345010	U5(d)	ccr	a	0.607681	22.4558	1	0.149	0.19545	0.755	2	-0.459	-0.41224	0.245	272
rs134288153	5	75261435	PVALB-NCF4	ccr	a	0.546157	22.4505	1	0.378	0.39998	0.307	2	-0.168	-0.14618	0.693	273
rs41604697	6	93832672	PAQR3-NAA11	ccr	a	-0.517965	22.4483	2	0.19	0.21926	0.634	1	-0.328	-0.2987	0.366	274
rs133739413	15	76648889	ZNF408-F2	ccr	a	-0.562933	22.4437	2	0.412	0.43823	0.269	1	-0.151	-0.12471	0.731	275
rs110061997	5	32566772	ENDOU	ccr	a	0.500222	22.4378	1	0.226	0.2523	0.549	2	-0.274	-0.24792	0.451	276
rs110694875	6	87405290	NPFFR2-ADAMTS3	ccr	a	0.498065	22.3707	1	0.233	0.2592	0.533	2	-0.265	-0.23886	0.467	277
rs110084815	9	74771426	MAP3K5-PEX7	ccr	a	-0.624698	22.3704	2	0.124	0.15259	0.802	1	-0.501	-0.47211	0.198	278
rs3423123264	1	129970365	LOC112447798	ccr	a	-0.5063	22.343	2	0.218	0.24095	0.57	1	-0.288	-0.26535	0.43	279
rs135859076	15	77171932	MADD	ccr	a	-0.57637	22.3021	2	0.428	0.45139	0.258	1	-0.149	-0.12498	0.742	280
rs41887415	18	50898271	LIPE	ccr	a	-0.508087	22.288	2	0.202	0.23015	0.603	1	-0.306	-0.27793	0.397	281
rs110714569	1	134451541	EPHB1	ccr	a	0.508014	22.2877	1	0.234	0.26318	0.54	2	-0.274	-0.24484	0.46	282
rs41663515	9	76008321	ARFGEF3	ccr	a	-0.548751	22.2778	2	0.157	0.18497	0.713	1	-0.392	-0.36378	0.287	283
rs136777254	9	75844495	U6-PERP	ccr	a	0.522056	22.2767	1	0.187	0.20918	0.641	2	-0.335	-0.31287	0.359	284
rs109565014	10	62005356	FBN1-DUT	ccr	a	-0.499572	22.2732	2	0.282	0.31023	0.435	1	-0.217	-0.18935	0.565	285
rs110097417	15	74640683	ALX4-CD82	ccr	a	-0.54417	22.2678	2	0.383	0.41118	0.296	1	-0.161	-0.13299	0.704	286
rs29024684	6	85662466	CSN3-ENSBTAG00000049824	ccr	a	0.516189	22.1883	1	0.332	0.35809	0.357	2	-0.184	-0.1581	0.643	287
rs3423200971	5	87090225	SOX5-ETNK1	ccr	a	0.554741	22.1684	1	0.157	0.1856	0.718	2	-0.398	-0.36914	0.282	288
rs110315716	1	139027128	ATP2C1-ENSBTAG00000050167	ccr	a	0.528332	22.1449	1	0.357	0.38361	0.325	2	-0.172	-0.14472	0.675	289
rs110990872	3	48766306	SLC44A3-ENSBTAG00000049865	ccr	a	0.511525	22.0837	1	0.192	0.22157	0.624	2	-0.319	-0.28995	0.376	290
rs133389577	9	77218355	LOC112448069	ccr	a	-0.556611	22.0828	2	0.15	0.17797	0.73	1	-0.406	-0.37864	0.27	291
rs3423277916	9	77340252	U5(d)	ccr	a	-0.57549	22.0827	2	0.14	0.16604	0.756	1	-0.435	-0.40945	0.244	292
rs109032238	1	140095860	PCP4-DSCAM	ccr	a	-0.495525	22.0643	2	0.239	0.26441	0.517	1	-0.256	-0.23112	0.483	293
rs110282352	10	58971737	GLDN	ccr	a	0.512383	22.063	1	0.19	0.21741	0.629	2	-0.322	-0.29498	0.371	294
rs382177617	8	83727039	ENSBTAG00000009764	ccr	a	-0.757397	22.0551	2	0.0916	0.11866	0.879	1	-0.666	-0.63873	0.121	295
rs133112151	6	85617846	ODAM-CSN3	ccr	a	0.516595	22.0402	1	0.33	0.35723	0.362	2	-0.187	-0.15937	0.638	296
rs41593792	8	84472391	SUSD3-CARD19	ccr	a	0.724455	22.0362	1	0.0981	0.1281	0.865	2	-0.626	-0.59636	0.135	297
rs3423230677	7	7087789	LOC615150	ccr	a	-0.502891	22.0197	2	0.281	0.29572	0.441	1	-0.222	-0.20717	0.559	298
rs109155375	1	62364649	bta-mir-2285de(u)	ccr	a	0.91742	21.991	1	0.0726	0.09735	0.921	2	-0.845	-0.82007	0.0791	299
rs42843763	5	32741949	RPAP3-ENSBTAG00000038027	ccr	a	0.533713	21.9742	1	0.163	0.18973	0.694	2	-0.37	-0.34398	0.306	300
rs109483390	9	75842621	U6-PERP	ccr	a	-0.511216	21.9726	2	0.184	0.21195	0.639	1	-0.327	-0.29927	0.361	301
rs110988713	15	75430142	SYT13-ENSBTAG00000050592	ccr	a	0.559294	21.9716	1	0.406	0.44801	0.273	2	-0.153	-0.11128	0.727	302
rs109322196	9	71388934	EYA4	ccr	a	0.775146	21.9293	1	0.0914	0.12081	0.882	2	-0.684	-0.65434	0.118	303
rs41576473	15	72173567	ENSBTAG00000051591(u)	ccr	a	-0.556874	21.929	2	0.408	0.42897	0.268	1	-0.149	-0.1279	0.732	304
ARS-BFGL-NGS-37859	5	80281106	FAR2	ccr	a	0.551567	21.9232	1	0.155	0.18393	0.72	2	-0.397	-0.36763	0.28	305
rs110882087	14	47975068	U6(d)	ccr	a	0.673825	21.8975	1	0.11	0.1328	0.837	2	-0.564	-0.54102	0.163	306
rs43703016	6	85656772	CSN3	ccr	a	0.513392	21.8915	1	0.33	0.35588	0.357	2	-0.183	-0.15751	0.643	307
rs41892940	18	57576120	ENSBTAG00000045880	ccr	a	-0.503684	21.8644	2	0.307	0.33317	0.39	1	-0.196	-0.17051	0.61	308
rs137341434	8	82787089	ERCC6L2-ENSBTAG00000053599	ccr	a	0.746378	21.8503	1	0.0926	0.1172	0.876	2	-0.654	-0.62918	0.124	309
rs135718502	5	75278600	NCF4	ccr	a	-0.53177	21.8339	2	0.367	0.39374	0.309	1	-0.164	-0.13803	0.691	310
rs41255628	1	144714475	PTTG1IP	ccr	a	-0.525004	21.8269	2	0.17	0.19672	0.676	1	-0.355	-0.32828	0.324	311
rs42718234	5	88267557	ABCC9	ccr	a	0.536816	21.8255	1	0.375	0.40154	0.301	2	-0.162	-0.13528	0.699	312
rs109258879	5	91118857	PLEKHA5-CAPZA3	ccr	a	0.664499	21.82	1	0.11	0.13678	0.835	2	-0.555	-0.52771	0.165	313
rs109032524	5	74740570	MYH9	ccr	a	-0.496624	21.8197	2	0.214	0.23824	0.568	1	-0.282	-0.25838	0.432	314
rs42757596	14	39278652	HNF4G-U6	ccr	a	0.552831	21.8132	1	0.15	0.17457	0.729	2	-0.403	-0.37826	0.271	315
rs43703015	6	85656736	CSN3	ccr	a	-0.514464	21.7838	2	0.33	0.36245	0.358	1	-0.184	-0.15202	0.642	316
rs136378312	6	89264599	LOC104968898	ccr	a	-0.520837	21.7413	2	0.175	0.20402	0.665	1	-0.346	-0.31682	0.335	317
rs110215185	23	28830632	TRIM40	ccr	a	-0.491759	21.7401	2	0.259	0.28639	0.474	1	-0.233	-0.20537	0.526	318
rs3423294424	9	71619205	EYA4	ccr	a	0.782877	21.7399	1	0.0859	0.11421	0.89	2	-0.697	-0.66867	0.11	319
rs42223324	10	68706049	PELI2	ccr	a	-0.492389	21.7333	2	0.223	0.24955	0.547	1	-0.269	-0.24283	0.453	320
rs111026799	6	89642507	AREG-BTC	ccr	a	0.498385	21.7299	1	0.209	0.23599	0.582	2	-0.29	-0.2624	0.418	321
rs110122189	14	48324592	TRPS1(u)	ccr	a	0.516111	21.7287	1	0.175	0.20176	0.66	2	-0.341	-0.31435	0.34	322
rs42378135	14	48653926	TRPS1	ccr	a	-0.589885	21.7213	2	0.131	0.15633	0.778	1	-0.459	-0.43355	0.222	323
rs3423226650	6	85656834	CSN3	ccr	a	0.513627	21.718	1	0.33	0.36042	0.358	2	-0.184	-0.15321	0.642	324
rs110312754	6	85686637	ENSBTAG00000049824-CABS1	ccr	a	0.501574	21.7128	1	0.304	0.33244	0.394	2	-0.197	-0.16913	0.606	325
rs41255156	8	80980150	CTSL	ccr	a	-0.564573	21.6554	2	0.142	0.1663	0.748	1	-0.423	-0.39827	0.252	326
rs110260188	14	33688217	SLCO5A1-PRDM14	ccr	a	0.540595	21.6472	1	0.155	0.18071	0.713	2	-0.385	-0.35988	0.287	327
rs41663866	5	75309150	NCF4-CSF2RB	ccr	a	-0.531077	21.629	2	0.368	0.39215	0.308	1	-0.163	-0.13892	0.692	328
rs43712312	3	47862687	LOC112445875	ccr	a	-0.530977	21.6207	2	0.163	0.18901	0.694	1	-0.368	-0.34197	0.306	329
rs3423199019	5	75414716	ENSBTAG00000032114-TEX33	ccr	a	0.535206	21.6175	1	0.373	0.39458	0.304	2	-0.162	-0.14063	0.696	330
rs110964572	11	85771451	ENSBTAG00000044370-LPIN1	ccr	a	-0.492138	21.6052	2	0.275	0.30165	0.441	1	-0.217	-0.19049	0.559	331
rs109654183	6	89237612	MTHFD2L	ccr	a	-0.522242	21.5805	2	0.175	0.20026	0.666	1	-0.348	-0.32198	0.334	332
rs137789945	1	143849610	CSTB	ccr	a	-0.586655	21.5759	2	0.131	0.15895	0.776	1	-0.455	-0.42771	0.224	333
rs110125983	6	85929213	LOC112447096	ccr	a	-0.512326	21.5721	2	0.321	0.34825	0.373	1	-0.191	-0.16407	0.627	334
rs43346196	3	63861865	ENSBTAG00000053907-U6	ccr	a	0.572503	21.5711	1	0.137	0.16322	0.761	2	-0.435	-0.40928	0.239	335
rs41664353	9	77275436	U5(d)	ccr	a	0.522468	21.5633	1	0.167	0.19341	0.68	2	-0.355	-0.32906	0.32	336
rs109040186	5	78423260	DENND5B	ccr	a	0.507558	21.5608	1	0.195	0.21644	0.616	2	-0.313	-0.29112	0.384	337
rs133604677	9	76276892	NHSL1	ccr	a	-0.505223	21.5424	2	0.192	0.21655	0.62	1	-0.313	-0.28868	0.38	338
rs110428662	11	83985738	LRATD1-ENSBTAG00000019284	ccr	a	0.692315	21.4574	1	0.591	0.61892	0.146	2	-0.101	-0.07339	0.854	339
rs110290820	1	139293876	BRWD1	ccr	a	-0.489941	21.4457	2	0.271	0.29759	0.447	1	-0.219	-0.19236	0.553	340
rs29017217	11	85606528	ENSBTAG00000044370-LPIN1	ccr	a	-0.490213	21.4306	2	0.251	0.27861	0.487	1	-0.239	-0.2116	0.513	341
rs41256968	15	65736591	CD44	ccr	a	-0.572492	21.3999	2	0.135	0.16133	0.764	1	-0.437	-0.41116	0.236	342
rs41782852	15	75328608	SYT13	ccr	a	0.489003	21.3794	1	0.265	0.29153	0.459	2	-0.224	-0.19747	0.541	343
rs135052123	6	85312679	SULT1E1	ccr	a	-0.556773	21.3388	2	0.145	0.16953	0.74	1	-0.412	-0.38724	0.26	344
rs109373447	5	90664868	PLEKHA5	ccr	a	-0.549696	21.3173	2	0.158	0.1986	0.713	1	-0.392	-0.35109	0.287	345
rs42358763	5	33503154	SLC38A4-ENSBTAG00000049143	ccr	a	-0.510986	21.3055	2	0.334	0.36547	0.346	1	-0.177	-0.14552	0.654	346
rs133038904	5	90669576	PLEKHA5	ccr	a	0.54982	21.3011	1	0.158	0.19867	0.714	2	-0.392	-0.35115	0.286	347
rs110401500	19	31252963	ARHGAP44	ccr	a	-0.520046	21.3006	2	0.356	0.3828	0.315	1	-0.164	-0.13725	0.685	348
rs110930185	8	83051775	SLC35D2	ccr	a	0.519212	21.2965	1	0.349	0.37503	0.328	2	-0.17	-0.14418	0.672	349
rs41639230	1	141395382	BACE2	ccr	a	-0.512536	21.2874	2	0.175	0.2027	0.658	1	-0.337	-0.30983	0.342	350
rs3423379124	14	37352616	ENSBTAG00000048533-U6	ccr	a	-0.503022	21.2869	2	0.187	0.21351	0.628	1	-0.316	-0.28952	0.372	351
rs43566450	8	83217737	CDC14B	ccr	a	0.502511	21.2503	1	0.185	0.21097	0.632	2	-0.318	-0.29155	0.368	352
rs43021837	1	144444371	TSPEAR	ccr	a	-0.528197	21.2455	2	0.369	0.39522	0.302	1	-0.16	-0.13298	0.698	353
rs3423367477	14	38090479	GDAP1-PI15	ccr	a	-0.489024	21.244	2	0.238	0.26095	0.514	1	-0.251	-0.22807	0.486	354
rs43272065	1	135056839	ENSBTAG00000049951-RYK	ccr	a	-0.497007	21.2408	2	0.195	0.22103	0.608	1	-0.302	-0.27598	0.392	355
rs109244076	18	49690710	C18H19orf47	ccr	a	0.488372	21.2305	1	0.282	0.30784	0.423	2	-0.207	-0.18053	0.577	356
rs29024154	5	32758717	RPAP3-ENSBTAG00000038027	ccr	a	-0.525273	21.2298	2	0.16	0.1863	0.696	1	-0.365	-0.33897	0.304	357
rs133987627	9	72065985	EYA4-TCF21	ccr	a	0.780656	21.2106	1	0.0864	0.11817	0.889	2	-0.694	-0.66248	0.111	358
rs41594139	9	70399986	STX7	ccr	a	0.626988	21.1907	1	0.112	0.13876	0.821	2	-0.515	-0.48823	0.179	359
rs109100495	5	75184352	PVALB	ccr	a	-0.501558	21.1675	2	0.196	0.21934	0.609	1	-0.305	-0.28222	0.391	360
rs43259472	1	113896073	Metazoa-SRP-ENSBTAG00000047341	ccr	a	-0.492071	21.1557	2	0.29	0.31517	0.41	1	-0.202	-0.1769	0.59	361
rs3423093643	14	37548790	JPH1	ccr	a	-0.548007	21.149	2	0.145	0.17311	0.735	1	-0.403	-0.37489	0.265	362
rs137367395	1	141650947	MX2	ccr	a	-0.57796	21.1418	2	0.139	0.17917	0.76	1	-0.439	-0.39879	0.24	363
rs110794449	9	76044703	ARFGEF3	ccr	a	0.498481	21.1396	1	0.184	0.20925	0.631	2	-0.314	-0.28923	0.369	364
rs134575759	9	77756518	ENSBTAG00000052963(u)	ccr	a	0.553752	21.124	1	0.142	0.16686	0.744	2	-0.412	-0.38689	0.256	365
rs135239501	7	6746293	KLF2-ENSBTAG00000042477	ccr	a	0.490118	21.1235	1	0.282	0.3069	0.425	2	-0.208	-0.18321	0.575	366
rs3423155610	3	57834231	ODF2L-ENSBTAG00000053371	ccr	a	-0.494744	21.1163	2	0.202	0.23485	0.591	1	-0.292	-0.25989	0.409	367
rs134142512	5	91418665	PIK3C2G	ccr	a	-0.519789	21.0889	2	0.174	0.21707	0.666	1	-0.346	-0.30272	0.334	368
rs110850975	18	51181978	ZNF574-ENSBTAG00000054584	ccr	a	0.544187	21.0557	1	0.146	0.17332	0.731	2	-0.398	-0.37087	0.269	369
rs42141252	1	142787751	SLC37A1	ccr	a	0.603729	21.0543	1	0.121	0.14763	0.8	2	-0.483	-0.4561	0.2	370
rs137673142	9	74447886	MAP7	ccr	a	0.542346	21.0516	1	0.152	0.17608	0.72	2	-0.39	-0.36627	0.28	371
rs136975596	1	141669989	MX1	ccr	a	0.575937	21.0059	1	0.138	0.17932	0.76	2	-0.437	-0.39662	0.24	372
rs134281682	5	90148847	5S-rRNA-ENSBTAG00000054482	ccr	a	-0.544228	20.9805	2	0.388	0.4206	0.287	1	-0.156	-0.12362	0.713	373
rs41882253	18	43514901	GPATCH1	ccr	a	0.547857	20.9791	1	0.144	0.16881	0.737	2	-0.404	-0.37905	0.263	374
rs133910335	5	75355460	CSF2RB	ccr	a	0.525316	20.9723	1	0.364	0.38704	0.308	2	-0.162	-0.13828	0.692	375
rs110230312	1	121946677	PLSCR2	ccr	a	0.482432	20.9663	1	0.255	0.28102	0.472	2	-0.228	-0.20141	0.528	376
rs110597143	1	144595788	TSPEAR	ccr	a	-0.522412	20.9578	2	0.166	0.19193	0.682	1	-0.356	-0.33048	0.318	377
rs135811452	1	139850233	IGSF5	ccr	a	-0.573669	20.9473	2	0.133	0.15954	0.768	1	-0.441	-0.41413	0.232	378
rs41780389	15	65968320	PAMR1	ccr	a	-0.492749	20.9409	2	0.245	0.28096	0.502	1	-0.248	-0.21179	0.498	379
rs42473941	1	134439125	EPHB1	ccr	a	-0.556264	20.9185	2	0.14	0.16627	0.749	1	-0.417	-0.38999	0.251	380
rs29017531	3	50351115	MTF2	ccr	a	-0.485033	20.9034	2	0.211	0.24419	0.564	1	-0.274	-0.24084	0.436	381
rs110301946	1	128830820	CLSTN2	ccr	a	0.542832	20.8633	1	0.146	0.17357	0.731	2	-0.397	-0.36926	0.269	382
rs135243344	14	64218695	POLR2K	ccr	a	0.582519	20.8005	1	0.127	0.15296	0.782	2	-0.456	-0.42956	0.218	383
rs41619822	1	137738847	CPNE4	ccr	a	-0.481654	20.7906	2	0.264	0.29032	0.452	1	-0.218	-0.19134	0.548	384
rs109559097	9	72705270	U6-ENSBTAG00000054673	ccr	a	-0.513599	20.7858	2	0.168	0.19327	0.674	1	-0.346	-0.32033	0.326	385
rs133266080	15	63267497	ENSBTAG00000052000-EIF3M	ccr	a	-0.524429	20.7754	2	0.349	0.37568	0.335	1	-0.176	-0.14874	0.665	386
rs109622006	8	83056340	SLC35D2	ccr	a	0.510605	20.7661	1	0.34	0.36612	0.335	2	-0.171	-0.14448	0.665	387
rs110398816	1	144679366	UBE2G2	ccr	a	-0.493161	20.7642	2	0.207	0.23894	0.579	1	-0.286	-0.25422	0.421	388
BovineHD0100034838	1	122333807	PLSCR4-PLOD2	ccr	a	0.482937	20.759	1	0.212	0.23814	0.562	2	-0.271	-0.2448	0.438	389
rs41887856	18	50846763	ENSBTAG00000050227	ccr	a	0.512509	20.7446	1	0.179	0.20088	0.651	2	-0.333	-0.31163	0.349	390
rs132979485	3	57739389	ODF2L-ENSBTAG00000053371	ccr	a	0.53231	20.7382	1	0.375	0.40751	0.296	2	-0.158	-0.1248	0.704	391
rs41608809	3	57667740	CLCA2-ODF2L	ccr	a	-0.517303	20.6972	2	0.357	0.38483	0.309	1	-0.16	-0.13247	0.691	392
rs111021838	18	51457300	ENSBTAG00000049346	ccr	a	-0.479842	20.6905	2	0.251	0.27493	0.476	1	-0.229	-0.20491	0.524	393
rs134189804	23	27242625	PRRT1-FKBPL	ccr	a	-0.483426	20.6402	2	0.23	0.26861	0.524	1	-0.253	-0.21481	0.476	394
rs110313686	9	76171385	ARFGEF3-HEBP2	ccr	a	-0.502953	20.6325	2	0.178	0.20672	0.647	1	-0.325	-0.29624	0.353	395
rs42221124	10	68120124	KTN1-ENSBTAG00000049100	ccr	a	0.477837	20.6184	1	0.237	0.26482	0.504	2	-0.241	-0.21301	0.496	396
rs110068335	5	91393516	PLCZ1-PIK3C2G	ccr	a	-0.510622	20.593	2	0.165	0.19161	0.677	1	-0.346	-0.31901	0.323	397
rs29012637	7	6739731	KLF2-ENSBTAG00000042477	ccr	a	0.483755	20.5877	1	0.203	0.22972	0.58	2	-0.281	-0.25403	0.42	398
rs135383158	7	7822971	BRD4	ccr	a	0.483457	20.5714	1	0.213	0.23977	0.558	2	-0.27	-0.24369	0.442	399
rs134237742	13	54598752	MRGBP-NTSR1	ccr	a	-0.496709	20.5398	2	0.178	0.20425	0.642	1	-0.319	-0.29246	0.358	400
rs42577552	1	114225007	Metazoa-SRP-ENSBTAG00000047341	ccr	a	-0.4776	20.5307	2	0.254	0.27995	0.467	1	-0.223	-0.19765	0.533	401
rs133168807	6	80689501	EPHA5(u)	ccr	a	0.477412	20.5261	1	0.256	0.27991	0.465	2	-0.222	-0.1975	0.535	402
rs134801204	18	50232872	ENSBTAG00000054384-CYP2B39	ccr	a	-0.485575	20.5091	2	0.204	0.23537	0.58	1	-0.282	-0.25021	0.42	403
rs3423093418	14	36581802	ENSBTAG00000048369-C14H8orf89	ccr	a	0.539358	20.5059	1	0.142	0.17038	0.736	2	-0.397	-0.36898	0.264	404
rs42230125	10	68307915	ENSBTAG00000049100	ccr	a	-0.481509	20.4703	2	0.205	0.23113	0.575	1	-0.277	-0.25038	0.425	405
rs110944449	5	84524072	LMNTD1-ENSBTAG00000055210	ccr	a	-0.659413	20.4256	2	0.103	0.12956	0.845	1	-0.557	-0.52985	0.155	406
rs29016994	5	78510349	DENND5B	ccr	a	0.482498	20.3625	1	0.198	0.22458	0.589	2	-0.284	-0.25792	0.411	407
rs41618959	11	87117767	NOL10-ODC1	ccr	a	0.548081	20.3332	1	0.411	0.43786	0.25	2	-0.137	-0.11022	0.75	408
rs133729181	19	32106657	COX10	ccr	a	0.479848	20.3313	1	0.281	0.30639	0.415	2	-0.199	-0.17346	0.585	409
rs110045848	1	134365317	EPHB1	ccr	a	0.489904	20.3053	1	0.307	0.33294	0.374	2	-0.183	-0.15697	0.626	410
rs41880544	18	44688799	U1-GARRE1	ccr	a	0.580708	20.2905	1	0.125	0.1604	0.784	2	-0.456	-0.42031	0.216	411
rs109584185	11	85791024	ENSBTAG00000044370-LPIN1	ccr	a	0.49688	20.2791	1	0.235	0.28798	0.527	2	-0.262	-0.2089	0.473	412
rs137842501	1	119741926	AGTR1-ENSBTAG00000046008	ccr	a	-0.478997	20.2404	2	0.276	0.30307	0.423	1	-0.203	-0.17592	0.577	413
rs136594372	9	70451572	STX7-TAAR9	ccr	a	0.740086	20.2389	1	0.0852	0.1116	0.885	2	-0.655	-0.62848	0.115	414
rs109006879	9	78329786	ENSBTAG00000052963-ENSBTAG00000052619	ccr	a	-0.515312	20.2333	2	0.155	0.18073	0.699	1	-0.36	-0.33458	0.301	415
rs133748361	5	35358732	DBX2-NELL2	ccr	a	0.593144	20.2301	1	0.117	0.1441	0.803	2	-0.476	-0.44905	0.197	416
rs110646735	1	134425704	EPHB1	ccr	a	-0.48753	20.227	2	0.303	0.32905	0.379	1	-0.185	-0.15848	0.621	417
rs109178000	5	80652213	FAR2(d)	ccr	a	0.475648	20.2261	1	0.24	0.26544	0.496	2	-0.236	-0.21021	0.504	418
rs110243446	15	76436055	AMBRA1	ccr	a	-0.480526	20.2017	2	0.262	0.27879	0.454	1	-0.218	-0.20173	0.546	419
rs3423379849	14	37322240	ENSBTAG00000054912-ENSBTAG00000048533	ccr	a	0.47395	20.1869	1	0.232	0.26106	0.511	2	-0.242	-0.21289	0.489	420
rs110848612	1	148262558	ENSBTAG00000030105-SETD4	ccr	a	-0.499575	20.1861	2	0.168	0.1948	0.664	1	-0.332	-0.30478	0.336	421
rs43335166	10	59343821	TNFAIP8L3	ccr	a	-0.472703	20.1807	2	0.24	0.2675	0.492	1	-0.233	-0.2052	0.508	422
rs134205369	10	67019894	CGRRF1	ccr	a	0.475384	20.1779	1	0.229	0.25236	0.518	2	-0.246	-0.22302	0.482	423
rs134201089	5	69553651	NUAK1-CKAP4	ccr	a	0.473327	20.1649	1	0.247	0.27092	0.479	2	-0.227	-0.2024	0.521	424
rs43708016	3	60541269	TTLL7(d)	ccr	a	0.484589	20.1303	1	0.297	0.32635	0.387	2	-0.188	-0.15824	0.613	425
rs135842555	1	140707368	DSCAM	ccr	a	0.486174	20.1194	1	0.29	0.31094	0.404	2	-0.196	-0.17523	0.596	426
rs29012948	14	60879468	RIMS2	ccr	a	0.653197	20.1156	1	0.102	0.12548	0.845	2	-0.552	-0.52771	0.155	427
rs109177898	5	69145921	ENSBTAG00000050973-5S-rRNA	ccr	a	0.486396	20.1108	1	0.301	0.32522	0.382	2	-0.186	-0.16118	0.618	428
rs136551788	14	43555484	TPD52-ZBTB10	ccr	a	0.520705	20.1071	1	0.156	0.17681	0.7	2	-0.364	-0.3439	0.3	429
rs41658946	8	83358562	CDC14B-PRXL2C	ccr	a	-0.485338	20.0981	2	0.186	0.21139	0.617	1	-0.3	-0.27394	0.383	430
rs135181475	14	32708133	C14H8orf34	ccr	a	-0.52535	20.0906	2	0.154	0.18647	0.706	1	-0.371	-0.33888	0.294	431
rs110223230	5	33478596	SLC38A4	ccr	a	0.505865	20.0897	1	0.33	0.3796	0.347	2	-0.176	-0.12626	0.653	432
rs133044580	5	30309274	SPATS2	ccr	a	0.472571	20.065	1	0.251	0.27829	0.47	2	-0.222	-0.19428	0.53	433
rs133680031	1	140713996	DSCAM	ccr	a	-0.47933	20.0589	2	0.286	0.31063	0.403	1	-0.193	-0.1687	0.597	434
rs109951084	1	142136010	PRDM15-C2CD2	ccr	a	-0.495893	20.0584	2	0.173	0.20268	0.652	1	-0.323	-0.29321	0.348	435
rs110745824	6	92331782	CXCL13-CNOT6L	ccr	a	-0.497715	20.0414	2	0.326	0.34924	0.346	1	-0.172	-0.14847	0.654	436
rs41622291	5	72585308	LARGE1(d)	ccr	a	-0.475252	20.0385	2	0.212	0.24065	0.555	1	-0.264	-0.2346	0.445	437
rs41565752	3	51016576	RPAP2	ccr	a	0.48499	20.0126	1	0.183	0.21295	0.622	2	-0.302	-0.27204	0.378	438
rs43160312	9	35405580	blank	ccr	a	0.477209	19.9842	1	0.197	0.22465	0.587	2	-0.28	-0.25256	0.413	439
rs109611920	10	66542380	BMP4-CDKN3	ccr	a	0.47017	19.9818	1	0.235	0.26076	0.501	2	-0.235	-0.20941	0.499	440
rs110168196	15	63271761	ENSBTAG00000052000-EIF3M	ccr	a	-0.709931	19.9515	2	0.0887	0.11687	0.875	1	-0.621	-0.59306	0.125	441
rs110883913	7	6699311	KLF2-ENSBTAG00000042477	ccr	a	0.481133	19.9488	1	0.201	0.21559	0.582	2	-0.28	-0.26555	0.418	442
rs41651440	5	80663044	FAR2(d)	ccr	a	0.513584	19.9438	1	0.36	0.38631	0.299	2	-0.154	-0.12728	0.701	443
rs3423364015	14	37187103	UBE2W-ELOC	ccr	a	0.472239	19.9363	1	0.25	0.27823	0.471	2	-0.223	-0.19401	0.529	444
rs137528949	1	140711452	DSCAM	ccr	a	-0.483938	19.9357	2	0.289	0.309	0.404	1	-0.195	-0.17494	0.596	445
rs110271945	15	72838306	ENSBTAG00000051591(d)	ccr	a	0.478215	19.9356	1	0.273	0.29708	0.429	2	-0.205	-0.18114	0.571	446
rs3423233199	7	8034403	SYDE1-OR1I4	ccr	a	-0.475532	19.9338	2	0.212	0.23761	0.555	1	-0.264	-0.23793	0.445	447
rs109429281	1	144594088	TSPEAR	ccr	a	-0.520209	19.9334	2	0.368	0.39918	0.292	1	-0.152	-0.12102	0.708	448
rs132745834	7	7867806	BRD4	ccr	a	-0.476776	19.9295	2	0.212	0.23924	0.556	1	-0.265	-0.23753	0.444	449
rs109722503	10	60404363	ATP8B4	ccr	a	0.471497	19.9204	1	0.223	0.25185	0.528	2	-0.249	-0.21965	0.472	450
rs135909264	14	34007251	NCOA2	ccr	a	0.473568	19.9083	1	0.23	0.25823	0.515	2	-0.244	-0.21534	0.485	451
rs109934936	5	80189414	LOC518980	ccr	a	0.528187	19.9078	1	0.145	0.17309	0.726	2	-0.383	-0.35509	0.274	452
rs110467864	9	70154996	LOC101904601	ccr	a	-0.540678	19.8861	2	0.14	0.16844	0.741	1	-0.401	-0.37224	0.259	453
rs109622870	8	80869483	DAPK1	ccr	a	-0.539743	19.8748	2	0.145	0.18486	0.731	1	-0.394	-0.35488	0.269	454
rs109398281	19	33169313	ZNF287-LRRC75A	ccr	a	0.4803	19.8527	1	0.218	0.24852	0.545	2	-0.262	-0.23178	0.455	455
rs137362290	1	140316047	DSCAM	ccr	a	0.471577	19.801	1	0.228	0.25355	0.516	2	-0.244	-0.21803	0.484	456
rs110034748	19	33169988	ZNF287-LRRC75A	ccr	a	-0.479301	19.7722	2	0.218	0.24796	0.545	1	-0.261	-0.23134	0.455	457
rs109022364	9	75785582	7SK-U6	ccr	a	-0.551522	19.7619	2	0.134	0.15959	0.757	1	-0.418	-0.39193	0.243	458
rs137508638	14	34099465	NCOA2	ccr	a	-0.476875	19.7427	2	0.232	0.26536	0.513	1	-0.245	-0.21152	0.487	459
rs133536984	14	32709825	C14H8orf34	ccr	a	0.514309	19.7401	1	0.152	0.1745	0.705	2	-0.362	-0.3398	0.295	460
rs43276488	1	141255563	7SK-ENSBTAG00000048701	ccr	a	-0.471678	19.7351	2	0.205	0.23361	0.564	1	-0.266	-0.23806	0.436	461
rs109556038	15	78442168	OR4P7-OR5D79	ccr	a	0.470074	19.7323	1	0.225	0.2515	0.521	2	-0.245	-0.21857	0.479	462
rs109182513	14	48256063	U6-TRPS1	ccr	a	0.530135	19.7185	1	0.139	0.16525	0.738	2	-0.391	-0.36489	0.262	463
rs133822572	14	38700427	HNF4G	ccr	a	-0.533248	19.7122	2	0.138	0.16293	0.741	1	-0.395	-0.37032	0.259	464
rs41903746	10	68473770	LOC101903945	ccr	a	0.478167	19.7078	1	0.211	0.26031	0.558	2	-0.267	-0.21786	0.442	465
rs111009012	14	43780419	ENSBTAG00000052076-ENSBTAG00000053020	ccr	a	0.482432	19.7072	1	0.179	0.20531	0.628	2	-0.303	-0.27712	0.372	466
rs135573340	1	68801039	KALRN	ccr	a	-0.624141	19.6923	2	0.105	0.13172	0.832	1	-0.519	-0.49242	0.168	467
rs109840008	1	146320854	PRMT2	ccr	a	0.468257	19.6923	1	0.23	0.25968	0.508	2	-0.238	-0.20858	0.492	468
rs133147738	14	41848621	PKIA-ZC2HC1A	ccr	a	0.557883	19.6668	1	0.126	0.15283	0.774	2	-0.432	-0.40505	0.226	469
rs136570493	1	123931322	5S-rRNA-ENSBTAG00000049240	ccr	a	-0.479002	19.6478	2	0.212	0.2496	0.557	1	-0.267	-0.2294	0.443	470
rs109192269	3	60537914	TTLL7(d)	ccr	a	0.492263	19.6446	1	0.301	0.32675	0.388	2	-0.191	-0.16551	0.612	471
rs109643504	3	56872830	SNORA62-ENSBTAG00000052679	ccr	a	-0.474236	19.6025	2	0.217	0.25529	0.542	1	-0.257	-0.21895	0.458	472
rs134971795	9	74977497	IL20RA	ccr	a	-0.500754	19.5961	2	0.161	0.18714	0.678	1	-0.34	-0.31362	0.322	473
rs134490186	1	138772735	NEK11	ccr	a	0.557898	19.5365	1	0.129	0.15264	0.77	2	-0.429	-0.40525	0.23	474
rs135316717	10	68394131	ENSBTAG00000049100-PELI2	ccr	a	0.47999	19.5318	1	0.19	0.22031	0.604	2	-0.29	-0.25968	0.396	475
rs29022845	9	37549294	ENSBTAG00000049840(d)	ccr	a	0.488604	19.5304	1	0.322	0.34931	0.342	2	-0.167	-0.1393	0.658	476
rs43707944	3	52242156	LOC112445878	ccr	a	-0.470184	19.5222	2	0.197	0.2236	0.581	1	-0.273	-0.24658	0.419	477
rs109798998	1	141793240	TMPRSS2-ENSBTAG00000050235	ccr	a	-0.476255	19.4898	2	0.292	0.31833	0.387	1	-0.184	-0.15792	0.613	478
rs41567285	14	42372600	IL7-ENSBTAG00000042141	ccr	a	0.598138	19.482	1	0.11	0.13569	0.816	2	-0.488	-0.46245	0.184	479
rs110229503	14	54353104	U5-KCNV1	ccr	a	0.648522	19.4675	1	0.0981	0.1228	0.849	2	-0.55	-0.52572	0.151	480
rs110661731	3	63165308	ADGRL2-ENSBTAG00000053907	ccr	a	-0.466241	19.4592	2	0.206	0.23373	0.558	1	-0.26	-0.23251	0.442	481
rs109511274	10	68176383	ENSBTAG00000049100	ccr	a	0.498901	19.4589	1	0.16	0.18067	0.68	2	-0.339	-0.31823	0.32	482
rs108983805	7	13931581	LOC787383	ccr	a	-0.503371	19.4545	2	0.349	0.37822	0.308	1	-0.155	-0.12515	0.692	483
BovineHD1800019760	18	50626421	ENSBTAG00000054384	ccr	a	-0.466099	19.4523	2	0.211	0.23996	0.547	1	-0.255	-0.22614	0.453	484
rs133224385	5	70725423	BTBD11	ccr	a	0.47228	19.4497	1	0.204	0.22392	0.567	2	-0.268	-0.24836	0.433	485
rs133373402	10	64302051	5S-rRNA(d)	ccr	a	0.470499	19.4494	1	0.231	0.26668	0.51	2	-0.24	-0.20382	0.49	486
rs42385828	9	37990154	LOC112448157	ccr	a	-0.675601	19.4476	2	0.584	0.61027	0.135	1	-0.0914	-0.06533	0.865	487
rs41728493	14	39381019	U6-ZFHX4	ccr	a	0.49974	19.4377	1	0.155	0.18165	0.689	2	-0.344	-0.31809	0.311	488
rs29017982	3	73879769	NEGR1-ZRANB2	ccr	a	0.462155	19.4342	1	0.216	0.24282	0.532	2	-0.246	-0.21934	0.468	489
rs135485368	1	132368058	SLC35G2-ENSBTAG00000054797	ccr	a	-0.465494	19.4239	2	0.253	0.27944	0.457	1	-0.213	-0.18605	0.543	490
rs3423259378	8	82565325	ERCC6L2	ccr	a	-0.480671	19.4068	2	0.189	0.2249	0.607	1	-0.292	-0.25577	0.393	491
rs41569367	9	75082661	IFNGR1	ccr	a	0.527765	19.4018	1	0.141	0.16651	0.732	2	-0.386	-0.36126	0.268	492
chr5_75993374	5	75617209	C1QTNF6	ccr	a	-0.519847	19.3912	2	0.378	0.40377	0.274	1	-0.142	-0.11607	0.726	493
rs110654483	9	73292804	MYB-AHI1	ccr	a	0.489323	19.3789	1	0.164	0.1896	0.664	2	-0.325	-0.29972	0.336	494
rs207600273	6	82257048	blank	ccr	a	-0.466488	19.3728	2	0.205	0.22882	0.561	1	-0.262	-0.23767	0.439	495
rs43263121	1	121839325	U2-PLSCR5	ccr	a	-0.46937	19.3676	2	0.253	0.27843	0.46	1	-0.216	-0.19094	0.54	496
rs109818043	5	84103522	ENSBTAG00000053615	ccr	a	0.474036	19.3577	1	0.24	0.27445	0.493	2	-0.234	-0.19958	0.507	497
rs110837964	14	43363553	TPD52-ZBTB10	ccr	a	0.529531	19.3471	1	0.14	0.1588	0.735	2	-0.389	-0.37073	0.265	498
rs108975426	10	59830116	USP8	ccr	a	-0.482106	19.346	2	0.175	0.20027	0.637	1	-0.307	-0.28183	0.363	499
rs133039046	10	64795155	SQOR(u)	ccr	a	0.4624	19.3334	1	0.225	0.24947	0.514	2	-0.238	-0.21293	0.486	500
rs43644469	10	62319499	SLC24A5-SEMA6D	ccr	a	-0.494338	19.2889	2	0.16	0.18872	0.677	1	-0.334	-0.30562	0.323	501
rs42976400	5	87028368	SOX5(d)	ccr	a	0.552377	19.2689	1	0.126	0.1516	0.772	2	-0.427	-0.40078	0.228	502
rs29012417	6	82628692	blank	ccr	a	-0.472266	19.252	2	0.288	0.31428	0.39	1	-0.184	-0.15799	0.61	503
rs135511775	6	89903007	PARM1	ccr	a	0.644837	19.2155	1	0.0983	0.12213	0.848	2	-0.547	-0.52271	0.152	504
rs133914865	1	110061492	7SK-VEPH1	ccr	a	-0.463306	19.2058	2	0.208	0.23555	0.55	1	-0.255	-0.22776	0.45	505
rs110828490	19	33176350	LRRC75A	ccr	a	0.469143	19.1987	1	0.214	0.24547	0.545	2	-0.256	-0.22367	0.455	506
rs41611714	10	66406378	U6-BMP4	ccr	a	-0.462187	19.1986	2	0.215	0.24181	0.534	1	-0.247	-0.22038	0.466	507
rs136493100	5	32949636	ENSBTAG00000038027-PCED1B	ccr	a	0.489365	19.1909	1	0.317	0.36177	0.352	2	-0.172	-0.12759	0.648	508
rs41643395	1	139937600	PCP4	ccr	a	-0.465792	19.182	2	0.271	0.29742	0.418	1	-0.195	-0.16838	0.582	509
rs109662544	5	80693563	FAR2(d)	ccr	a	0.506019	19.1436	1	0.355	0.37305	0.299	2	-0.151	-0.13297	0.701	510
rs41579079	14	33945834	NCOA2	ccr	a	0.461341	19.1407	1	0.223	0.24827	0.517	2	-0.238	-0.21307	0.483	511
rs42895701	1	128885502	CLSTN2	ccr	a	0.480944	19.1343	1	0.176	0.20051	0.635	2	-0.305	-0.28043	0.365	512
rs41568872	1	125202968	SLC9A9	ccr	a	-0.461569	19.1325	2	0.251	0.27771	0.456	1	-0.21	-0.18386	0.544	513
rs42935077	14	39287784	HNF4G-U6	ccr	a	-0.50232	19.1228	2	0.164	0.19533	0.674	1	-0.339	-0.30699	0.326	514
rs109763804	5	84742242	ENSBTAG00000050678-KRAS	ccr	a	0.464623	19.0811	1	0.265	0.29238	0.429	2	-0.199	-0.17224	0.571	515
rs41611044	11	94607518	DENND1A	ccr	a	-0.640187	19.0619	2	0.0969	0.12244	0.849	1	-0.543	-0.51774	0.151	516
rs3423153001	3	55816126	ENSBTAG00000051499	ccr	a	-0.468554	19.0597	2	0.257	0.28743	0.451	1	-0.211	-0.18113	0.549	517
rs134992889	1	122830457	PLOD2(d)	ccr	a	0.485059	19.0515	1	0.164	0.19117	0.661	2	-0.321	-0.29389	0.339	518
rs41912766	5	37247097	LOC786089	ccr	a	0.458838	19.0414	1	0.219	0.24481	0.522	2	-0.239	-0.21403	0.478	519
rs110449275	5	90683163	PLEKHA5	ccr	a	-0.528143	19.0174	2	0.139	0.17426	0.737	1	-0.389	-0.35388	0.263	520
rs110431300	21	8110759	PGPEP1L	ccr	a	-0.496846	18.9998	2	0.151	0.17913	0.696	1	-0.346	-0.31772	0.304	521
rs385878988	1	123269176	blank	ccr	a	-0.486058	18.9992	2	0.166	0.19317	0.658	1	-0.32	-0.29288	0.342	522
rs41597796	10	66129758	U6-U6	ccr	a	-0.46151	18.9985	2	0.23	0.27016	0.501	1	-0.231	-0.19135	0.499	523
rs109849660	3	49515221	ABCA4	ccr	a	0.482863	18.986	1	0.316	0.34823	0.346	2	-0.167	-0.13464	0.654	524
rs41630566	14	46570537	EXT1-MED30	ccr	a	0.459861	18.9804	1	0.209	0.23463	0.545	2	-0.25	-0.22523	0.455	525
rs109779278	9	68260591	L3MBTL3	ccr	a	0.4986	18.9665	1	0.148	0.17389	0.704	2	-0.351	-0.32471	0.296	526
rs41656714	5	31079915	CCNT1	ccr	a	0.457914	18.963	1	0.246	0.27256	0.462	2	-0.212	-0.18536	0.538	527
rs41583452	14	33055818	C14H8orf34-SULF1	ccr	a	0.521046	18.951	1	0.136	0.16008	0.738	2	-0.385	-0.36097	0.262	528
rs41655345	6	91800062	SEPTIN11	ccr	a	-0.472274	18.9317	2	0.297	0.32297	0.372	1	-0.176	-0.1493	0.628	529
rs133531749	10	59807572	USP8	ccr	a	-0.52493	18.9031	2	0.142	0.18109	0.729	1	-0.383	-0.34384	0.271	530
rs136530454	9	73342942	AHI1	ccr	a	0.471752	18.8969	1	0.175	0.19982	0.629	2	-0.297	-0.27193	0.371	531
rs134404801	10	60807297	FGF7	ccr	a	-0.461303	18.8825	2	0.205	0.23176	0.555	1	-0.256	-0.22955	0.445	532
rs41852476	17	70028737	RNF185	ccr	a	0.502643	18.8804	1	0.356	0.38242	0.291	2	-0.146	-0.12022	0.709	533
rs41658112	7	7744255	AKAP8L	ccr	a	-0.465845	18.8729	2	0.188	0.21519	0.596	1	-0.278	-0.25065	0.404	534
rs110779722	14	55685870	TMEM74-EMC2	ccr	a	-0.615957	18.8704	2	0.101	0.12664	0.836	1	-0.515	-0.48932	0.164	535
rs111024607	1	134707028	KY	ccr	a	0.469661	18.8637	1	0.29	0.3152	0.383	2	-0.18	-0.15446	0.617	536
rs43710073	9	71053760	RPS12-EYA4	ccr	a	-0.634746	18.853	2	0.0959	0.12253	0.849	1	-0.539	-0.51221	0.151	537
rs109764250	15	74619098	ALX4-CD82	ccr	a	-0.46474	18.8339	2	0.188	0.21434	0.595	1	-0.277	-0.2504	0.405	538
rs109033222	1	142114021	PRDM15	ccr	a	-0.483618	18.831	2	0.163	0.19166	0.663	1	-0.321	-0.29195	0.337	539
rs42406584	5	88309764	ABCC9	ccr	a	-0.479065	18.8169	2	0.311	0.33882	0.351	1	-0.168	-0.14025	0.649	540
rs29019814	14	46226278	EXT1	ccr	a	0.50481	18.8108	1	0.143	0.16956	0.716	2	-0.362	-0.33525	0.284	541
rs135312496	9	76688839	REPS1	ccr	a	0.502113	18.7826	1	0.148	0.17255	0.705	2	-0.354	-0.32956	0.295	542
rs3423206804	5	103673698	ENSBTAG00000051680	ccr	a	0.48594	18.774	1	0.328	0.35322	0.325	2	-0.158	-0.13272	0.675	543
rs136668830	14	49987352	U6(u)	ccr	a	0.501656	18.7691	1	0.15	0.17348	0.702	2	-0.352	-0.32817	0.298	544
rs42405458	5	88360524	ABCC9	ccr	a	-0.464508	18.7618	2	0.184	0.21088	0.604	1	-0.28	-0.25363	0.396	545
rs3423230491	7	14004420	ENSBTAG00000053212-OR7E184P	ccr	a	0.481446	18.743	1	0.315	0.34413	0.345	2	-0.166	-0.13732	0.655	546
rs110764343	9	37899510	LAMA4(u)	ccr	a	0.471718	18.7423	1	0.286	0.3114	0.394	2	-0.186	-0.16032	0.606	547
rs134400334	11	83905791	LRATD1-ENSBTAG00000019284	ccr	a	0.517311	18.7207	1	0.139	0.17548	0.731	2	-0.378	-0.34183	0.269	548
rs3423094207	5	68607576	ALDH1L2-WASHC4	ccr	a	0.455608	18.708	1	0.213	0.23916	0.534	2	-0.243	-0.21645	0.466	549
rs3423363850	14	36618142	C14H8orf89	ccr	a	0.468004	18.7024	1	0.212	0.24025	0.547	2	-0.256	-0.22775	0.453	550
rs133698224	1	139555009	SH3BGR	ccr	a	0.51797	18.6984	1	0.136	0.16421	0.737	2	-0.382	-0.35376	0.263	551
rs41784300	15	77546541	NUP160	ccr	a	-0.4655	18.6953	2	0.181	0.20761	0.611	1	-0.284	-0.25789	0.389	552
rs109010775	7	6798353	AP1M1	ccr	a	0.552391	18.6942	1	0.433	0.45987	0.215	2	-0.119	-0.09252	0.785	553
rs110188230	5	28064960	SCN8A	ccr	a	0.453445	18.6596	1	0.235	0.26163	0.481	2	-0.218	-0.19181	0.519	554
rs41636018	1	121805428	U2-PLSCR5	ccr	a	0.45656	18.6576	1	0.216	0.24268	0.528	2	-0.241	-0.21388	0.472	555
rs3423286273	9	70532420	TAAR6-ENSBTAG00000054490	ccr	a	0.543242	18.6382	1	0.123	0.15297	0.773	2	-0.42	-0.39027	0.227	556
rs41730268	14	40565849	ENSBTAG00000032831-ENSBTAG00000039499	ccr	a	-0.470913	18.6216	2	0.17	0.19607	0.64	1	-0.301	-0.27485	0.36	557
rs110304273	10	58999970	GLDN	ccr	a	0.452777	18.6136	1	0.226	0.25227	0.501	2	-0.227	-0.20051	0.499	558
rs29014852	5	81170381	CCDC91(u)	ccr	a	0.472593	18.6124	1	0.301	0.32774	0.362	2	-0.171	-0.14485	0.638	559
rs41578204	1	120419996	ENSBTAG00000050282-ZIC1	ccr	a	0.47357	18.5993	1	0.17	0.19632	0.64	2	-0.303	-0.27725	0.36	560
rs43638613	10	69778006	NAA30	ccr	a	-0.456714	18.5743	2	0.201	0.22901	0.559	1	-0.255	-0.22771	0.441	561
rs109452246	5	67506930	NT5DC3	ccr	a	0.453866	18.5712	1	0.21	0.23629	0.538	2	-0.244	-0.21758	0.462	562
rs135457890	1	120318966	ENSBTAG00000050282	ccr	a	0.483729	18.5602	1	0.179	0.21802	0.629	2	-0.304	-0.26571	0.371	563
rs135602761	9	76785478	ABRACL-HECA	ccr	a	-0.503599	18.5567	2	0.146	0.17053	0.711	1	-0.358	-0.33307	0.289	564
rs3423092794	14	37632845	GDAP1	ccr	a	0.454111	18.5552	1	0.245	0.2725	0.46	2	-0.209	-0.18161	0.54	565
rs132792228	5	67630040	C5H12orf73	ccr	a	-0.499887	18.5465	2	0.151	0.16887	0.698	1	-0.349	-0.33101	0.302	566
rs109680710	1	146185449	DIP2A	ccr	a	0.459858	18.531	1	0.192	0.22019	0.583	2	-0.268	-0.23967	0.417	567
rs137209107	1	68043046	MYLK	ccr	a	0.81362	18.5306	1	0.0705	0.09519	0.913	2	-0.743	-0.71843	0.0867	568
rs110556461	11	85999076	LOC112448828	ccr	a	0.5136	18.5001	1	0.378	0.4042	0.264	2	-0.136	-0.1094	0.736	569
rs41791275	15	80377898	OR5AK30-LRRC55	ccr	a	0.46895	18.4926	1	0.178	0.20952	0.62	2	-0.291	-0.25943	0.38	570
rs134661542	5	69717176	TCP11L2-POLR3B	ccr	a	0.476414	18.4858	1	0.302	0.32504	0.366	2	-0.174	-0.15137	0.634	571
rs41616336	10	56658480	WDR72	ccr	a	0.452186	18.4668	1	0.24	0.26673	0.468	2	-0.212	-0.18546	0.532	572
rs43741365	18	43633287	LRP3	ccr	a	0.456195	18.4657	1	0.213	0.25076	0.533	2	-0.243	-0.20544	0.467	573
rs137545431	6	92370834	CXCL13-CNOT6L	ccr	a	0.453537	18.4497	1	0.242	0.26179	0.467	2	-0.212	-0.19175	0.533	574
rs109289741	5	68293598	CHST11	ccr	a	-0.467043	18.4464	2	0.176	0.20188	0.624	1	-0.291	-0.26516	0.376	575
rs133614518	14	52053072	CSMD3	ccr	a	-0.471165	18.4333	2	0.185	0.21407	0.607	1	-0.286	-0.2571	0.393	576
rs41776574	15	64296597	KIAA1549L	ccr	a	-0.675703	18.4164	2	0.0944	0.12509	0.86	1	-0.581	-0.55062	0.14	577
rs111013611	1	134580004	EPHB1-ENSBTAG00000054179	ccr	a	-0.453826	18.413	2	0.204	0.23239	0.552	1	-0.25	-0.22143	0.448	578
rs136518432	10	63763062	5S-rRNA(u)	ccr	a	-0.460205	18.398	2	0.223	0.25375	0.516	1	-0.237	-0.20645	0.484	579
rs110647333	1	141319127	7SK-ENSBTAG00000048701	ccr	a	0.493979	18.3853	1	0.153	0.1924	0.69	2	-0.341	-0.30158	0.31	580
rs109628799	5	88461168	KCNJ8-LDHB	ccr	a	0.463271	18.3803	1	0.284	0.31054	0.386	2	-0.179	-0.15273	0.614	581
rs42855397	1	128909979	CLSTN2	ccr	a	0.489337	18.3797	1	0.155	0.18081	0.683	2	-0.334	-0.30853	0.317	582
rs109661477	14	52588078	CSMD3(d)	ccr	a	-0.567947	18.378	2	0.111	0.13676	0.804	1	-0.457	-0.43119	0.196	583
rs110262397	6	89936981	PARM1	ccr	a	-0.462619	18.3771	2	0.274	0.29299	0.407	1	-0.188	-0.16963	0.593	584
rs41890224	18	55467515	PLEKHA4	ccr	a	-0.493483	18.3511	2	0.335	0.3747	0.322	1	-0.159	-0.11878	0.678	585
rs133347814	7	7703235	RASAL3	ccr	a	0.465153	18.3287	1	0.2	0.22918	0.571	2	-0.265	-0.23598	0.429	586
rs134164726	18	43101000	ANKRD27	ccr	a	-0.470447	18.3197	2	0.166	0.19201	0.648	1	-0.305	-0.27844	0.352	587
rs110597477	18	48648276	FBXO17	ccr	a	-0.460637	18.3194	2	0.181	0.20776	0.606	1	-0.279	-0.25287	0.394	588
rs133622706	14	41262180	U6-ENSBTAG00000050099	ccr	a	0.468	18.3171	1	0.183	0.21028	0.609	2	-0.285	-0.25772	0.391	589
rs41852491	17	70004734	PLA2G3-RNF185	ccr	a	-0.554966	18.26	2	0.435	0.47057	0.216	1	-0.12	-0.0844	0.784	590
rs43638065	10	61462408	CEP152	ccr	a	-0.455313	18.2499	2	0.191	0.21722	0.581	1	-0.264	-0.23809	0.419	591
rs41632223	14	64299714	RGS22	ccr	a	-0.558882	18.2446	2	0.114	0.14044	0.796	1	-0.445	-0.41844	0.204	592
rs134009403	5	77252112	FGD4	ccr	a	0.507151	18.227	1	0.372	0.39686	0.267	2	-0.135	-0.11029	0.733	593
rs109407609	5	81116016	CCDC91(u)	ccr	a	-0.477347	18.2206	2	0.158	0.18477	0.669	1	-0.319	-0.29258	0.331	594
rs134806140	18	57682137	ENSBTAG00000035868-MIR99B	ccr	a	-0.456966	18.2122	2	0.268	0.2975	0.413	1	-0.189	-0.15947	0.587	595
rs136751759	5	88463419	KCNJ8-LDHB	ccr	a	0.464024	18.207	1	0.289	0.31772	0.378	2	-0.176	-0.14631	0.622	596
rs110423614	3	57562191	CLCA1	ccr	a	0.454337	18.2025	1	0.198	0.22573	0.564	2	-0.256	-0.22861	0.436	597
rs133414438	14	48382671	TRPS1(u)	ccr	a	0.484034	18.2018	1	0.15	0.17589	0.69	2	-0.334	-0.30814	0.31	598
rs109874240	1	142636491	TFF1-TMPRSS3	ccr	a	0.466835	18.1517	1	0.167	0.1935	0.642	2	-0.3	-0.27333	0.358	599
rs134881296	9	78232591	ENSBTAG00000052963-ENSBTAG00000052619	ccr	a	-0.483849	18.1507	2	0.158	0.19597	0.674	1	-0.326	-0.28788	0.326	600
rs109686094	13	54024608	ZBTB46	ccr	a	0.470591	18.1272	1	0.161	0.18748	0.659	2	-0.31	-0.28311	0.341	601
rs109117939	11	83924697	LRATD1-ENSBTAG00000019284	ccr	a	-0.577944	18.1176	2	0.471	0.49794	0.184	1	-0.107	-0.08001	0.816	602
rs110857775	5	67580457	TTC41	ccr	a	0.452707	18.0894	1	0.208	0.22902	0.54	2	-0.244	-0.22369	0.46	603
rs43274494	1	135368478	SLCO2A1	ccr	a	-0.457329	18.086	2	0.209	0.24233	0.543	1	-0.248	-0.215	0.457	604
rs110022109	9	30760081	5S-rRNA(u)	ccr	a	-0.449684	18.0827	2	0.225	0.24451	0.5	1	-0.225	-0.20517	0.5	605
rs41257332	19	33443229	TTC19	ccr	a	-0.463899	18.0682	2	0.283	0.3128	0.39	1	-0.181	-0.1511	0.61	606
rs3423380499	14	36655588	RDH10-STAU2	ccr	a	-0.518911	18.0641	2	0.136	0.16569	0.738	1	-0.383	-0.35322	0.262	607
rs110575358	10	59776168	USP8-USP50	ccr	a	-0.469884	18.0636	2	0.172	0.20449	0.635	1	-0.298	-0.2654	0.365	608
rs109880264	5	29791963	GPD1	ccr	a	0.447811	18.0346	1	0.241	0.26875	0.461	2	-0.206	-0.17906	0.539	609
rs29026456	1	140005163	PCP4	ccr	a	0.448586	18.0284	1	0.203	0.22983	0.547	2	-0.246	-0.21876	0.453	610
rs110571915	18	52090191	ZNF404-ZNF45	ccr	a	-0.453703	18.0266	2	0.187	0.21618	0.587	1	-0.267	-0.23753	0.413	611
rs41571071	1	113822309	LOC784259	ccr	a	-0.446758	17.9906	2	0.227	0.25366	0.492	1	-0.22	-0.1931	0.508	612
rs134610665	1	110351780	VEPH1-U6	ccr	a	0.448	17.9836	1	0.226	0.25037	0.496	2	-0.222	-0.19763	0.504	613
rs41636773	18	53538483	IGFL1-HIF3A	ccr	a	-0.467462	17.9787	2	0.305	0.32991	0.347	1	-0.162	-0.13755	0.653	614
rs42739334	6	102065812	KLHL8	ccr	a	0.897261	17.9591	1	0.0594	0.0888	0.934	2	-0.838	-0.80846	0.0662	615
rs110693378	1	72236014	ACAP2	ccr	a	-0.486126	17.955	2	0.146	0.17042	0.699	1	-0.34	-0.31571	0.301	616
rs41632193	14	64061208	RNF19A	ccr	a	0.52264	17.9314	1	0.124	0.15022	0.762	2	-0.398	-0.37242	0.238	617
rs109767408	18	55631111	C18H19orf73	ccr	a	0.476413	17.9269	1	0.32	0.35299	0.329	2	-0.157	-0.12343	0.671	618
rs134395266	14	51574264	CSMD3	ccr	a	0.469602	17.9132	1	0.169	0.20491	0.641	2	-0.301	-0.26469	0.359	619
rs3423374878	14	37936100	GDAP1-PI15	ccr	a	0.469644	17.9121	1	0.166	0.19159	0.647	2	-0.304	-0.27806	0.353	620
rs43708406	5	87697736	C2CD5	ccr	a	0.714331	17.884	1	0.0783	0.10436	0.89	2	-0.636	-0.60997	0.11	621
rs137480500	20	39647895	RAI14-C1QTNF3	ccr	a	-0.506478	17.8786	2	0.134	0.16515	0.736	1	-0.373	-0.34133	0.264	622
rs41589116	10	62238475	MYEF2	ccr	a	-0.448976	17.8657	2	0.196	0.22271	0.563	1	-0.253	-0.22626	0.437	623
rs110300570	14	61555417	ATP6V1C1-AZIN1	ccr	a	-0.522176	17.8619	2	0.132	0.15656	0.747	1	-0.39	-0.36562	0.253	624
rs137844449	6	87315748	NPFFR2	ccr	a	-0.460348	17.844	2	0.287	0.31705	0.377	1	-0.174	-0.1433	0.623	625
rs137530439	1	119371607	CPB1	ccr	a	-0.472874	17.8247	2	0.31	0.33434	0.344	1	-0.163	-0.13853	0.656	626
rs137487634	1	138268870	CPNE4	ccr	a	0.476369	17.8246	1	0.324	0.35073	0.319	2	-0.152	-0.12564	0.681	627
rs41621822	19	31902307	LOC112442639	ccr	a	-0.459452	17.8043	2	0.293	0.3174	0.362	1	-0.167	-0.14205	0.638	628
rs135280029	1	133745828	PPP2R3A-ENSBTAG00000051032	ccr	a	0.449949	17.7991	1	0.223	0.25551	0.504	2	-0.227	-0.19444	0.496	629
rs109928164	5	69708507	TCP11L2	ccr	a	-0.443804	17.795	2	0.231	0.25737	0.48	1	-0.213	-0.18644	0.52	630
rs109711583	15	73956444	HSD17B12	ccr	a	0.449089	17.7894	1	0.25	0.28042	0.444	2	-0.199	-0.16867	0.556	631
rs109971012	5	70700083	BTBD11	ccr	a	0.451631	17.78	1	0.268	0.29425	0.406	2	-0.184	-0.15738	0.594	632
rs132640979	3	58438291	ZNHIT6	ccr	a	-0.444382	17.7681	2	0.225	0.26183	0.493	1	-0.219	-0.18255	0.507	633
rs110914422	6	85446151	CSN1S1-CSN2	ccr	a	0.477357	17.7178	1	0.149	0.17614	0.687	2	-0.328	-0.30122	0.313	634
rs109614062	5	36333541	TMEM117	ccr	a	0.443101	17.6971	1	0.243	0.26892	0.452	2	-0.2	-0.17418	0.548	635
rs41591510	14	56841884	ENSBTAG00000006213-ENSBTAG00000008257	ccr	a	0.592363	17.6954	1	0.0999	0.12448	0.831	2	-0.492	-0.46788	0.169	636
rs135555435	3	51700414	TGFBR3	ccr	a	-0.4449	17.6947	2	0.217	0.24626	0.512	1	-0.228	-0.19864	0.488	637
rs132916178	15	62468802	ELP4	ccr	a	-0.442486	17.6933	2	0.228	0.25289	0.485	1	-0.214	-0.18959	0.515	638
rs137001288	1	146384948	PRMT2-ENSBTAG00000052513	ccr	a	0.491945	17.6888	1	0.144	0.17804	0.708	2	-0.348	-0.31391	0.292	639
rs134130409	3	52695086	BARHL2(d)	ccr	a	0.455834	17.6838	1	0.172	0.19701	0.623	2	-0.284	-0.25883	0.377	640
rs134226669	1	146080279	PCNT	ccr	a	-0.452058	17.6808	2	0.206	0.24676	0.545	1	-0.246	-0.2053	0.455	641
rs3423371112	14	36416626	TERF1	ccr	a	0.527242	17.6802	1	0.119	0.14527	0.774	2	-0.408	-0.38198	0.226	642
rs42652835	8	82284150	PTCH1-ENSBTAG00000049821	ccr	a	-0.511765	17.6771	2	0.131	0.15756	0.745	1	-0.381	-0.3542	0.255	643
rs41635778	18	50004821	ITPKC	ccr	a	0.469187	17.6679	1	0.315	0.34353	0.328	2	-0.154	-0.12565	0.672	644
rs110592498	5	90000564	5S-rRNA-ENSBTAG00000054482	ccr	a	0.524172	17.6661	1	0.121	0.15161	0.768	2	-0.403	-0.37256	0.232	645
rs41780879	15	76445841	AMBRA1	ccr	a	0.450024	17.6641	1	0.246	0.26913	0.454	2	-0.204	-0.18089	0.546	646
rs134897904	14	46998534	ENSBTAG00000045207-SLC30A8	ccr	a	-0.530598	17.6617	2	0.121	0.14318	0.772	1	-0.41	-0.38742	0.228	647
rs110625053	3	56231790	ENSBTAG00000049274-ENSBTAG00000054817	ccr	a	-0.446509	17.6532	2	0.225	0.26124	0.496	1	-0.222	-0.18526	0.504	648
rs109985403	1	128050323	SLC25A36-ENSBTAG00000052041	ccr	a	0.449345	17.6328	1	0.266	0.29362	0.408	2	-0.184	-0.15572	0.592	649
rs109632354	6	93937667	PAQR3-NAA11	ccr	a	0.451782	17.6317	1	0.237	0.26439	0.476	2	-0.215	-0.18739	0.524	650
rs41628019	14	28529843	YTHDF3(d)	ccr	a	0.441158	17.6239	1	0.217	0.24332	0.508	2	-0.224	-0.19783	0.492	651
rs43272698	1	134339686	EPHB1	ccr	a	0.453237	17.5911	1	0.174	0.19983	0.617	2	-0.28	-0.2534	0.383	652
rs132872452	13	54062111	RTEL1	ccr	a	0.46312	17.5817	1	0.159	0.18494	0.657	2	-0.304	-0.27818	0.343	653
rs134044518	10	62244967	SLC24A5	ccr	a	-0.451879	17.5713	2	0.197	0.23145	0.565	1	-0.255	-0.22043	0.435	654
rs110886371	19	35152019	USP22-ENSBTAG00000054465	ccr	a	-0.439877	17.5694	2	0.207	0.23377	0.528	1	-0.232	-0.2061	0.472	655
rs42972958	1	114044721	Metazoa-SRP-ENSBTAG00000047341	ccr	a	-0.451023	17.5666	2	0.271	0.29028	0.399	1	-0.18	-0.16074	0.601	656
rs42337096	10	56739999	WDR72	ccr	a	0.441162	17.5657	1	0.232	0.25859	0.475	2	-0.209	-0.18257	0.525	657
rs135104789	18	43102660	ANKRD27	ccr	a	-0.477988	17.5654	2	0.168	0.21748	0.649	1	-0.31	-0.26051	0.351	658
rs110418530	9	36422579	ENSBTAG00000049305-HDAC2	ccr	a	-0.453393	17.5633	2	0.188	0.21513	0.586	1	-0.266	-0.23827	0.414	659
rs109961667	5	26920830	TNS2	ccr	a	0.443832	17.5541	1	0.192	0.21889	0.567	2	-0.251	-0.22494	0.433	660
rs133031305	18	51122041	DEDD2-POU2F2	ccr	a	-0.551505	17.5532	2	0.11	0.14093	0.8	1	-0.441	-0.41057	0.2	661
rs43271805	1	132917243	STAG1	ccr	a	0.451052	17.544	1	0.275	0.30232	0.39	2	-0.176	-0.14873	0.61	662
rs43267675	1	120398043	ENSBTAG00000050282-ZIC1	ccr	a	-0.459264	17.5432	2	0.295	0.32103	0.358	1	-0.165	-0.13823	0.642	663
rs43568461	8	83687485	U6-ENSBTAG00000009764	ccr	a	-0.593843	17.5305	2	0.0981	0.12466	0.835	1	-0.496	-0.46918	0.165	664
rs135120416	14	61481829	ATP6V1C1-AZIN1	ccr	a	0.562322	17.5266	1	0.11	0.13012	0.804	2	-0.452	-0.4322	0.196	665
rs42364973	3	62316795	ADGRL2(u)	ccr	a	0.441313	17.5254	1	0.243	0.27122	0.448	2	-0.198	-0.17009	0.552	666
rs41639364	1	135146332	RYK	ccr	a	-0.516113	17.5181	2	0.127	0.15642	0.755	1	-0.39	-0.35969	0.245	667
rs133207289	1	135912745	U8-BFSP2	ccr	a	-0.447164	17.5174	2	0.215	0.25245	0.519	1	-0.232	-0.19471	0.481	668
rs137785199	8	90131596	LOC112447835	ccr	a	-1.0102	17.4914	2	0.0525	0.09394	0.948	1	-0.958	-0.91626	0.052	669
rs43274500	1	135357858	SLCO2A1	ccr	a	0.460701	17.49	1	0.182	0.21064	0.605	2	-0.279	-0.25007	0.395	670
rs109735242	5	29601113	FAM186A-U6	ccr	a	0.44131	17.4811	1	0.209	0.23614	0.526	2	-0.232	-0.20517	0.474	671
rs135796720	13	54055781	TNFRSF6B	ccr	a	0.458881	17.4608	1	0.165	0.18904	0.64	2	-0.294	-0.26984	0.36	672
rs136717690	5	93627442	SLC15A5	ccr	a	0.554944	17.4579	1	0.108	0.13346	0.805	2	-0.447	-0.42149	0.195	673
rs135421200	18	43098493	ANKRD27	ccr	a	-0.475989	17.4572	2	0.168	0.21787	0.647	1	-0.308	-0.25812	0.353	674
rs109713333	23	22606475	CRISP1-DEFB114	ccr	a	0.456956	17.4552	1	0.203	0.25177	0.555	2	-0.254	-0.20519	0.445	675
rs110736095	1	133687413	PPP2R3A-ENSBTAG00000051032	ccr	a	-0.443597	17.443	2	0.229	0.25897	0.484	1	-0.215	-0.18463	0.516	676
rs43707947	3	57860119	ODF2L-ENSBTAG00000053371	ccr	a	-0.438295	17.4364	2	0.223	0.25139	0.49	1	-0.215	-0.1869	0.51	677
rs133407982	5	86824735	SOX5(d)	ccr	a	-0.558187	17.4354	2	0.109	0.14147	0.805	1	-0.449	-0.41672	0.195	678
rs43274482	1	135372297	SLCO2A1	ccr	a	-0.4557	17.4182	2	0.181	0.22021	0.603	1	-0.275	-0.23549	0.397	679
rs42329378	15	81362069	ENSBTAG00000021375	ccr	a	0.459834	17.4162	1	0.161	0.18712	0.651	2	-0.299	-0.27271	0.349	680
rs110296781	5	80936393	CCDC91(u)	ccr	a	0.445655	17.4145	1	0.192	0.21419	0.569	2	-0.254	-0.23146	0.431	681
rs137055089	7	10494698	OR7A96	ccr	a	0.440201	17.4112	1	0.212	0.23529	0.518	2	-0.228	-0.20491	0.482	682
rs43274475	1	135372854	SLCO2A1	ccr	a	0.455585	17.4106	1	0.181	0.21989	0.603	2	-0.275	-0.2357	0.397	683
rs3423380119	14	37627404	GDAP1	ccr	a	-0.450478	17.4059	2	0.243	0.27372	0.46	1	-0.207	-0.17676	0.54	684
rs41626653	15	78110607	OR4C46	ccr	a	0.440831	17.4026	1	0.24	0.26924	0.457	2	-0.201	-0.17159	0.543	685
rs110583614	5	91784867	PIK3C2G	ccr	a	-0.487785	17.398	2	0.349	0.37901	0.284	1	-0.138	-0.10877	0.716	686
rs134344312	1	143990473	AGPAT3	ccr	a	0.461305	17.3855	1	0.302	0.33063	0.346	2	-0.16	-0.13068	0.654	687
rs43282015	1	146612774	ENSBTAG00000054155	ccr	a	0.442438	17.3844	1	0.189	0.21417	0.573	2	-0.253	-0.22827	0.427	688
rs133264765	5	87527600	ETNK1(u)	ccr	a	0.705348	17.378	1	0.0774	0.10136	0.89	2	-0.628	-0.60398	0.11	689
rs108939593	10	64005836	5S-rRNA(d)	ccr	a	-0.451898	17.3762	2	0.172	0.19976	0.619	1	-0.28	-0.25214	0.381	690
rs132924769	18	43099149	ANKRD27	ccr	a	0.467747	17.3615	1	0.165	0.21413	0.647	2	-0.303	-0.25361	0.353	691
rs3423093414	14	37072597	STAU2-UBE2W	ccr	a	-0.439391	17.3577	2	0.242	0.26871	0.449	1	-0.197	-0.17068	0.551	692
rs379236718	8	81085852	FBP1	ccr	a	0.644764	17.3504	1	0.0856	0.11205	0.867	2	-0.559	-0.53271	0.133	693
rs109869787	15	78368959	OR4C1-OR4C1J	ccr	a	-0.437575	17.3502	2	0.23	0.25611	0.475	1	-0.208	-0.18146	0.525	694
BovineHD1000016895	10	56707317	WDR72	ccr	a	0.439496	17.34	1	0.224	0.25637	0.49	2	-0.215	-0.18313	0.51	695
rs134385209	14	61568053	LOC112449557	ccr	a	0.494703	17.3386	1	0.135	0.16159	0.727	2	-0.359	-0.33312	0.273	696
rs110483741	9	43949194	PRDM1(d)	ccr	a	0.561971	17.327	1	0.458	0.4854	0.184	2	-0.104	-0.07657	0.816	697
rs42652130	8	82287985	PTCH1-ENSBTAG00000049821	ccr	a	-0.517002	17.3068	2	0.131	0.16673	0.747	1	-0.386	-0.35027	0.253	698
rs133325071	18	57496092	ENSBTAG00000008851-ENSBTAG00000047675	ccr	a	-0.451957	17.2988	2	0.189	0.2199	0.582	1	-0.263	-0.23206	0.418	699
rs110966220	5	90667044	PLEKHA5	ccr	a	-0.550605	17.2844	2	0.109	0.13915	0.802	1	-0.441	-0.41145	0.198	700
rs134396804	5	75246880	PVALB-NCF4	ccr	a	0.474781	17.2661	1	0.33	0.358	0.304	2	-0.144	-0.11678	0.696	701
rs110700575	7	7906380	EPHX3-NOTCH3	ccr	a	-0.440618	17.2609	2	0.235	0.25825	0.467	1	-0.206	-0.18237	0.533	702
rs110285649	11	83882569	LRATD1-ENSBTAG00000019284	ccr	a	0.470318	17.2484	1	0.147	0.17302	0.688	2	-0.324	-0.2973	0.312	703
rs109993707	5	71948717	LARGE1	ccr	a	-0.4465	17.2396	2	0.177	0.20531	0.603	1	-0.269	-0.24119	0.397	704
rs135547317	9	72731397	U6-ENSBTAG00000054673	ccr	a	-0.507286	17.2287	2	0.124	0.1497	0.756	1	-0.383	-0.35759	0.244	705
rs41579555	18	50412082	ENSBTAG00000054384-AXL	ccr	a	0.54177	17.1988	1	0.11	0.13832	0.798	2	-0.432	-0.40345	0.202	706
rs109054242	15	80937178	MED19	ccr	a	0.448615	17.1921	1	0.174	0.20104	0.613	2	-0.275	-0.24757	0.387	707
rs109009213	10	60649777	LOC112448490	ccr	a	-0.465704	17.185	2	0.156	0.18688	0.665	1	-0.31	-0.27882	0.335	708
rs134192977	23	31548947	ENSBTAG00000048345-HMGN4	ccr	a	-0.440122	17.1813	2	0.194	0.22262	0.559	1	-0.246	-0.21751	0.441	709
rs42142753	14	39785964	U6-ZFHX4	ccr	a	0.440664	17.1506	1	0.188	0.21462	0.574	2	-0.253	-0.22604	0.426	710
rs43275363	1	141082789	7SK-ENSBTAG00000048701	ccr	a	0.465267	17.1499	1	0.162	0.19977	0.652	2	-0.304	-0.2655	0.348	711
rs110729832	10	67898830	TBPL2	ccr	a	-0.439931	17.1496	2	0.191	0.22082	0.565	1	-0.249	-0.21912	0.435	712
rs133054050	6	82954099	CENPC(u)	ccr	a	-0.442445	17.1493	2	0.259	0.28009	0.414	1	-0.183	-0.16235	0.586	713
rs110805345	1	117011150	MED12L	ccr	a	0.440822	17.1455	1	0.257	0.28286	0.417	2	-0.184	-0.15796	0.583	714
rs109725450	13	55540693	CDH4	ccr	a	0.495062	17.1428	1	0.13	0.15512	0.738	2	-0.366	-0.33994	0.262	715
rs41594412	1	119403243	CPB1-AGTR1	ccr	a	0.446576	17.128	1	0.275	0.30118	0.385	2	-0.172	-0.14539	0.615	716
rs3423119679	1	123251966	blank	ccr	a	0.453118	17.1213	1	0.22	0.25001	0.514	2	-0.233	-0.20311	0.486	717
rs109344721	5	91849202	PIK3C2G	ccr	a	-0.503442	17.1192	2	0.379	0.40704	0.248	1	-0.125	-0.0964	0.752	718
rs110536598	5	33666514	SLC38A4-ENSBTAG00000049143	ccr	a	0.443877	17.116	1	0.247	0.29241	0.444	2	-0.197	-0.15147	0.556	719
rs41890827	18	57445788	NKG7-LIM2	ccr	a	0.480441	17.1103	1	0.139	0.16223	0.71	2	-0.341	-0.31821	0.29	720
rs43639551	10	69722290	SNORA72-NAA30	ccr	a	0.438431	17.1099	1	0.19	0.21759	0.566	2	-0.248	-0.22084	0.434	721
rs132988562	14	33121885	C14H8orf34-SULF1	ccr	a	-0.522682	17.1027	2	0.118	0.1472	0.774	1	-0.405	-0.37548	0.226	722
rs136251618	3	73527504	NEGR1	ccr	a	-0.454282	17.0971	2	0.172	0.20383	0.622	1	-0.282	-0.25045	0.378	723
rs41652689	5	85151402	BCAT1	ccr	a	0.438137	17.0969	1	0.245	0.27107	0.441	2	-0.193	-0.16707	0.559	724
rs41610971	9	45715723	ENSBTAG00000053858-U6	ccr	a	-0.663021	17.0747	2	0.583	0.60941	0.121	1	-0.08	-0.05361	0.879	725
rs132964769	6	91397116	SHROOM3	ccr	a	-0.438704	17.07	2	0.225	0.24292	0.487	1	-0.214	-0.19578	0.513	726
rs136582267	11	88844883	ENSBTAG00000052273-ENSBTAG00000037793	ccr	a	0.447588	17.0686	1	0.202	0.24144	0.549	2	-0.246	-0.20615	0.451	727
rs42232842	3	73567641	NEGR1	ccr	a	-0.447429	17.0616	2	0.169	0.19741	0.621	1	-0.278	-0.25002	0.379	728
rs136284950	15	39143937	LOC100297470	ccr	a	-0.434044	17.0447	2	0.208	0.23898	0.52	1	-0.226	-0.19506	0.48	729
rs42530896	15	62058172	DCDC1	ccr	a	0.454965	17.0441	1	0.297	0.32344	0.347	2	-0.158	-0.13153	0.653	730
rs110001262	1	120832214	ENSBTAG00000050282-ZIC1	ccr	a	0.44	17.0322	1	0.22	0.24854	0.501	2	-0.22	-0.19146	0.499	731
rs135715112	10	67262107	SAMD4A	ccr	a	0.466297	17.0086	1	0.151	0.17542	0.677	2	-0.316	-0.29087	0.323	732
rs136159768	14	42378281	IL7-ENSBTAG00000042141	ccr	a	-0.467793	17.0072	2	0.154	0.17415	0.671	1	-0.314	-0.29364	0.329	733
rs43264168	1	122362922	PLOD2	ccr	a	0.442843	16.9991	1	0.179	0.20411	0.596	2	-0.264	-0.23873	0.404	734
rs110360168	9	65629321	RIPPLY2-ENSBTAG00000026578	ccr	a	0.501321	16.9962	1	0.123	0.14946	0.754	2	-0.378	-0.35186	0.246	735
rs137845447	9	74926564	SLC35D3-IL20RA	ccr	a	0.466553	16.9938	1	0.151	0.1751	0.676	2	-0.315	-0.29145	0.324	736
rs41779635	15	64825823	ABTB2	ccr	a	0.460269	16.9855	1	0.154	0.1839	0.666	2	-0.307	-0.27637	0.334	737
rs42215609	1	112998357	ENSBTAG00000024623-GPR149	ccr	a	-0.439665	16.974	2	0.182	0.20782	0.587	1	-0.258	-0.23185	0.413	738
rs133426722	3	64309025	U6-ENSBTAG00000052602	ccr	a	-0.443812	16.9723	2	0.173	0.20064	0.611	1	-0.271	-0.24318	0.389	739
rs109857170	1	136142168	TMEM108	ccr	a	-0.46509	16.9697	2	0.317	0.34199	0.319	1	-0.148	-0.1231	0.681	740
rs110804621	1	122159457	PLSCR1-PLSCR4	ccr	a	-0.461662	16.9555	2	0.311	0.33657	0.327	1	-0.151	-0.12509	0.673	741
rs3423206788	5	103635305	CD4	ccr	a	-0.487109	16.9546	2	0.349	0.38176	0.284	1	-0.138	-0.10535	0.716	742
rs29027239	5	91757353	PIK3C2G	ccr	a	0.432389	16.9522	1	0.209	0.2353	0.517	2	-0.223	-0.19708	0.483	743
rs137107793	5	28970729	HIGD1C	ccr	a	0.437049	16.9464	1	0.193	0.22136	0.557	2	-0.244	-0.21569	0.443	745
rs110696437	5	68121612	CHST11	ccr	a	0.458057	16.9464	1	0.154	0.18028	0.664	2	-0.304	-0.27777	0.336	744
rs109825631	6	82992397	CENPC(u)	ccr	a	-0.431881	16.9119	2	0.218	0.24477	0.494	1	-0.213	-0.18711	0.506	746
rs41618107	3	62278399	ADGRL2(u)	ccr	a	0.434189	16.9111	1	0.24	0.26817	0.447	2	-0.194	-0.16602	0.553	747
rs109629089	1	140348608	DSCAM	ccr	a	-0.432847	16.9067	2	0.232	0.25602	0.465	1	-0.201	-0.17683	0.535	748
rs42426753	1	145748929	COL6A1-COL6A2	ccr	a	0.432078	16.9005	1	0.228	0.25621	0.473	2	-0.204	-0.17586	0.527	749
rs133300217	5	67378680	STAB2	ccr	a	0.432781	16.8745	1	0.232	0.25523	0.464	2	-0.201	-0.17755	0.536	750
rs110858191	1	142369967	UMODL1	ccr	a	0.581854	16.8684	1	0.0961	0.12162	0.835	2	-0.486	-0.46024	0.165	751
rs3423371426	14	37674726	GDAP1-PI15	ccr	a	0.442311	16.858	1	0.213	0.24413	0.518	2	-0.229	-0.19818	0.482	752
rs135304364	8	83863845	IARS1	ccr	a	0.448287	16.855	1	0.264	0.29265	0.41	2	-0.184	-0.15563	0.59	753
rs3423374842	14	37676754	GDAP1-PI15	ccr	a	-0.442242	16.8543	2	0.213	0.24346	0.518	1	-0.229	-0.19878	0.482	754
rs41788568	15	75857414	SLC35C1	ccr	a	0.440436	16.8423	1	0.263	0.28739	0.403	2	-0.178	-0.15305	0.597	755
rs41566262	10	55804926	UNC13C	ccr	a	-0.463478	16.8332	2	0.148	0.1786	0.681	1	-0.316	-0.28488	0.319	756
rs135676709	15	75695986	ENSBTAG00000054083-CHST1	ccr	a	0.454437	16.8273	1	0.285	0.3303	0.373	2	-0.17	-0.12414	0.627	757
rs109888062	11	38615193	LOC107132925	ccr	a	-0.555683	16.8249	2	0.105	0.13747	0.81	1	-0.45	-0.41821	0.19	758
rs43644495	10	62343829	SLC24A5-SEMA6D	ccr	a	-0.461433	16.8008	2	0.158	0.19166	0.658	1	-0.304	-0.26977	0.342	759
rs109640592	11	86086329	LPIN1	ccr	a	0.511945	16.7996	1	0.119	0.15366	0.767	2	-0.393	-0.35829	0.233	760
rs43102803	8	83031733	SLC35D2	ccr	a	-0.445443	16.7835	2	0.207	0.2429	0.536	1	-0.239	-0.20254	0.464	761
rs41571019	10	56608109	WDR72	ccr	a	-0.430393	16.7814	2	0.214	0.24413	0.502	1	-0.216	-0.18626	0.498	762
rs41595625	1	113856987	Metazoa-SRP(d)	ccr	a	0.430099	16.7721	1	0.212	0.23846	0.507	2	-0.218	-0.19164	0.493	763
rs43033705	15	79984314	ENSBTAG00000052245-ENSBTAG00000037928	ccr	a	-0.470356	16.7714	2	0.153	0.1866	0.674	1	-0.317	-0.28376	0.326	764
rs133831190	23	23586172	ENSBTAG00000053324-PKHD1	ccr	a	0.4362	16.7707	1	0.226	0.26617	0.481	2	-0.21	-0.17003	0.519	765
rs137189341	7	11191214	ADGRE3-ENSBTAG00000053318	ccr	a	0.447021	16.7675	1	0.28	0.30819	0.373	2	-0.167	-0.13883	0.627	766
rs41776550	15	64280418	KIAA1549L	ccr	a	-0.44314	16.7635	2	0.168	0.19285	0.62	1	-0.275	-0.25029	0.38	767
rs134966575	18	42609946	ENSBTAG00000003856-ZNF507	ccr	a	0.466599	16.7571	1	0.189	0.24751	0.594	2	-0.277	-0.21909	0.406	768
rs43278831	1	142486334	UMODL1-ABCG1	ccr	a	-0.551114	16.753	2	0.103	0.13006	0.813	1	-0.448	-0.42105	0.187	769
rs43705620	3	63463815	ENSBTAG00000053907-U6	ccr	a	0.441501	16.7384	1	0.269	0.29775	0.391	2	-0.173	-0.14375	0.609	770
rs3423366928	14	36192842	KCNB2	ccr	a	-0.445326	16.7357	2	0.164	0.19004	0.631	1	-0.281	-0.25529	0.369	771
rs134327762	5	83136617	ITPR2	ccr	a	0.455164	16.7038	1	0.302	0.3254	0.337	2	-0.153	-0.12977	0.663	772
rs3423124029	1	130087493	LOC783600	ccr	a	0.485515	16.7032	1	0.136	0.15661	0.721	2	-0.35	-0.32891	0.279	773
rs41572869	5	82333451	PPFIBP1	ccr	a	-0.434224	16.6991	2	0.186	0.21071	0.571	1	-0.248	-0.22352	0.429	774
rs43748430	15	63008030	ENSBTAG00000052796	ccr	a	0.475386	16.6815	1	0.142	0.17016	0.702	2	-0.334	-0.30523	0.298	775
rs134570231	1	146870110	ENSBTAG00000046447	ccr	a	-0.43382	16.6795	2	0.187	0.21669	0.569	1	-0.247	-0.21713	0.431	776
rs43278453	1	142383844	UMODL1	ccr	a	-0.43444	16.6774	2	0.224	0.2578	0.485	1	-0.211	-0.17664	0.515	777
rs109550715	11	94689615	DENND1A	ccr	a	-0.512455	16.6524	2	0.116	0.14196	0.774	1	-0.397	-0.3705	0.226	778
rs43644506	10	62345768	SLC24A5-SEMA6D	ccr	a	-0.459331	16.6459	2	0.157	0.19075	0.659	1	-0.303	-0.26858	0.341	779
rs136665959	18	50434128	ENSBTAG00000054384-AXL	ccr	a	0.446366	16.6179	1	0.172	0.19374	0.615	2	-0.275	-0.25263	0.385	780
rs43734710	8	82161159	PTCH1	ccr	a	0.620078	16.6119	1	0.0909	0.13412	0.853	2	-0.529	-0.48596	0.147	781
rs137840966	5	30300334	KCNH3-SPATS2	ccr	a	0.573625	16.6103	1	0.475	0.50298	0.172	2	-0.0988	-0.07065	0.828	782
rs41590507	3	60563205	TTLL7-ENSBTAG00000050554	ccr	a	0.497192	16.6074	1	0.367	0.38927	0.262	2	-0.13	-0.10792	0.738	783
rs110340232	1	135499300	RAB6B	ccr	a	0.511493	16.6044	1	0.116	0.14069	0.773	2	-0.395	-0.3708	0.227	784
rs134754076	1	123398850	5S-rRNA(u)	ccr	a	0.440336	16.5966	1	0.177	0.20808	0.598	2	-0.263	-0.23226	0.402	785
rs43644484	10	62336986	SLC24A5-SEMA6D	ccr	a	0.458588	16.5948	1	0.157	0.1907	0.659	2	-0.302	-0.26789	0.341	786
rs43644483	10	62335147	SLC24A5-SEMA6D	ccr	a	0.458564	16.5926	1	0.157	0.19058	0.659	2	-0.302	-0.26798	0.341	787
rs132910912	5	86893188	SOX5(d)	ccr	a	0.490035	16.5883	1	0.128	0.15603	0.739	2	-0.362	-0.334	0.261	788
rs135645253	3	65376906	ENSBTAG00000005007-ADGRL4	ccr	a	-0.465716	16.5748	2	0.151	0.18424	0.677	1	-0.315	-0.28148	0.323	789
rs110576841	15	66032379	PAMR1-FJX1	ccr	a	-0.428175	16.5467	2	0.203	0.22962	0.526	1	-0.225	-0.19855	0.474	790
rs109999683	1	128184812	ENSBTAG00000052041-TRIM42	ccr	a	-0.463583	16.5434	2	0.32	0.34839	0.309	1	-0.143	-0.11519	0.691	791
rs109187331	15	76295386	CREB3L1	ccr	a	0.435822	16.5287	1	0.261	0.28753	0.401	2	-0.175	-0.1483	0.599	792
rs41619212	13	52964454	TGM3-STK35	ccr	a	0.450551	16.5157	1	0.152	0.17862	0.663	2	-0.299	-0.27193	0.337	793
rs110895644	5	29853345	RACGAP1	ccr	a	-0.42971	16.5142	2	0.229	0.25576	0.467	1	-0.201	-0.17395	0.533	794
rs137609441	5	30324870	SPATS2	ccr	a	-0.587049	16.5086	2	0.492	0.5197	0.162	1	-0.0948	-0.06735	0.838	795
rs109174980	3	57451132	LOC112446001	ccr	a	-0.435704	16.4948	2	0.264	0.29134	0.393	1	-0.171	-0.14436	0.607	796
rs135828120	15	72013428	blank	ccr	a	0.446699	16.492	1	0.21	0.25628	0.53	2	-0.237	-0.19042	0.47	797
rs136179101	5	29624227	U6-LIMA1	ccr	a	-0.43555	16.488	2	0.263	0.28934	0.397	1	-0.173	-0.14621	0.603	798
rs41663097	4	83228263	LSM8(d)	ccr	a	0.542521	16.4813	1	0.103	0.12999	0.809	2	-0.439	-0.41253	0.191	799
rs109248332	6	85536862	CSN1S2	ccr	a	0.540686	16.4798	1	0.434	0.46232	0.197	2	-0.107	-0.07837	0.803	800
rs109559701	5	66632006	PAH	ccr	a	0.434188	16.477	1	0.19	0.206	0.563	2	-0.245	-0.22819	0.437	801
rs135664828	5	33396129	ENSBTAG00000052030-SLC38A4	ccr	a	-0.595241	16.4669	2	0.505	0.53634	0.152	1	-0.0905	-0.05891	0.848	802
rs42074522	14	52101389	CSMD3	ccr	a	0.439485	16.4531	1	0.165	0.19367	0.625	2	-0.275	-0.24582	0.375	803
rs110353875	1	144464756	TSPEAR	ccr	a	0.53188	16.4279	1	0.108	0.13335	0.797	2	-0.424	-0.39853	0.203	804
rs109567975	18	45810571	HPN-ENSBTAG00000054525	ccr	a	-0.531629	16.4271	2	0.106	0.13183	0.801	1	-0.426	-0.3998	0.199	805
rs137355872	4	78293492	C4H7orf25-ENSBTAG00000054524	ccr	a	0.428875	16.4036	1	0.205	0.2342	0.521	2	-0.223	-0.19467	0.479	806
rs109205828	1	69012232	KALRN	ccr	a	0.88466	16.3939	1	0.0545	0.08118	0.938	2	-0.83	-0.80348	0.0616	807
rs42325039	8	68072160	ENSBTAG00000012266(d)	ccr	a	0.431864	16.3898	1	0.254	0.28081	0.412	2	-0.178	-0.15106	0.588	808
rs41621125	15	62456943	ELP4	ccr	a	-0.493449	16.3736	2	0.122	0.1472	0.753	1	-0.371	-0.34625	0.247	809
rs135176671	1	144551556	TSPEAR	ccr	a	0.454771	16.3724	1	0.148	0.17624	0.675	2	-0.307	-0.27853	0.325	810
rs211141685	6	82283005	blank	ccr	a	-0.42806	16.3717	2	0.2	0.23152	0.534	1	-0.228	-0.19654	0.466	811
rs41601104	1	117593495	EIF2A	ccr	a	0.428153	16.3713	1	0.241	0.26692	0.437	2	-0.187	-0.16123	0.563	812
rs42617560	19	35925135	WFIKKN2-ENSBTAG00000042852	ccr	a	0.423996	16.3634	1	0.208	0.23681	0.509	2	-0.216	-0.18719	0.491	813
rs3423228230	6	82051224	ENSBTAG00000052362(d)	ccr	a	-0.446611	16.3556	2	0.288	0.31721	0.356	1	-0.159	-0.12941	0.644	814
rs136210522	1	146913802	ENSBTAG00000046447-RUNX1	ccr	a	0.429929	16.3347	1	0.202	0.23651	0.53	2	-0.228	-0.19342	0.47	815
rs134539108	6	52754659	ENSBTAG00000050660(u)	ccr	a	-0.437848	16.3304	2	0.171	0.19789	0.609	1	-0.267	-0.23996	0.391	816
rs109342271	3	44285206	PLPPR5	ccr	a	-0.46106	16.3086	2	0.147	0.183	0.681	1	-0.314	-0.27806	0.319	817
rs41623597	1	112914641	ENSBTAG00000024623-GPR149	ccr	a	0.429613	16.305	1	0.178	0.20413	0.586	2	-0.252	-0.22548	0.414	818
rs3423444153	19	31479267	ENSBTAG00000052541-HS3ST3A1	ccr	a	0.428431	16.2961	1	0.224	0.24858	0.477	2	-0.204	-0.17986	0.523	819
rs135851644	9	72722658	LOC112448065	ccr	a	0.461191	16.2944	1	0.149	0.17007	0.677	2	-0.312	-0.29112	0.323	820
rs43396191	4	47470418	LOC104972036	ccr	a	-0.456425	16.2848	2	0.151	0.17135	0.669	1	-0.305	-0.28507	0.331	821
rs135343330	3	53078333	ZNF326(u)	ccr	a	0.48807	16.2829	1	0.362	0.38587	0.259	2	-0.127	-0.1022	0.741	822
rs136004411	18	44383419	ENSBTAG00000050669	ccr	a	-0.496701	16.2803	2	0.121	0.15626	0.756	1	-0.375	-0.34044	0.244	823
rs42575643	1	114112973	Metazoa-SRP-ENSBTAG00000047341	ccr	a	-0.438977	16.2797	2	0.278	0.30592	0.367	1	-0.161	-0.13305	0.633	824
rs110831737	23	30695018	LOC617979	ccr	a	-0.623389	16.2786	2	0.54	0.57137	0.133	1	-0.0831	-0.05202	0.867	825
rs137357048	26	43877138	ENSBTAG00000049849-OAT	ccr	a	0.452146	16.2736	1	0.297	0.33068	0.344	2	-0.156	-0.12147	0.656	826
rs135434481	9	75925150	PERP	ccr	a	0.445664	16.273	1	0.157	0.18348	0.649	2	-0.289	-0.26218	0.351	827
rs137398343	14	33294132	SULF1	ccr	a	0.504578	16.2696	1	0.119	0.14461	0.765	2	-0.386	-0.35997	0.235	828
rs42221261	1	113584302	ARHGEF26-Metazoa-SRP	ccr	a	0.423748	16.26	1	0.209	0.23622	0.507	2	-0.215	-0.18753	0.493	829
rs43560689	8	70559619	ENTPD4	ccr	a	-0.434395	16.2512	2	0.266	0.29366	0.389	1	-0.169	-0.14074	0.611	830
rs42368806	14	49790517	U6(u)	ccr	a	0.427479	16.2434	1	0.197	0.22923	0.539	2	-0.231	-0.19825	0.461	831
rs136890576	3	56415950	ENSBTAG00000049274-ENSBTAG00000054817	ccr	a	0.4268	16.2429	1	0.204	0.23912	0.522	2	-0.223	-0.18768	0.478	832
rs137148584	5	34883837	ANO6	ccr	a	-0.551364	16.2256	2	0.104	0.15153	0.811	1	-0.447	-0.39983	0.189	833
rs136671137	1	120380846	ENSBTAG00000050282(d)	ccr	a	-0.455834	16.2122	2	0.299	0.32475	0.345	1	-0.157	-0.13108	0.655	834
rs109071905	9	72476225	ENSBTAG00000048577	ccr	a	0.462781	16.1955	1	0.136	0.16199	0.707	2	-0.327	-0.30079	0.293	835
rs110877507	1	142126884	PRDM15	ccr	a	0.609965	16.1715	1	0.0885	0.12802	0.855	2	-0.521	-0.48194	0.145	836
rs43342075	3	64020621	U6-ENSBTAG00000052602	ccr	a	0.482559	16.1708	1	0.357	0.38878	0.26	2	-0.125	-0.09378	0.74	837
rs110602571	5	81743375	CCDC91-PTHLH	ccr	a	0.426737	16.1493	1	0.221	0.25469	0.482	2	-0.206	-0.17205	0.518	838
rs109835954	5	29976434	AQP2-FAIM2	ccr	a	0.422493	16.139	1	0.225	0.25291	0.468	2	-0.198	-0.16959	0.532	839
rs42377562	9	31397466	5S-rRNA-ENSBTAG00000039169	ccr	a	-0.453283	16.1208	2	0.159	0.18718	0.649	1	-0.294	-0.2661	0.351	840
rs41775254	15	64268978	KIAA1549L	ccr	a	-0.452296	16.1208	2	0.171	0.19808	0.622	1	-0.281	-0.25422	0.378	841
rs526555006	1	122033684	PLSCR1	ccr	a	-0.47338	16.1184	2	0.133	0.15886	0.718	1	-0.34	-0.31452	0.282	842
rs41630030	13	54065681	RTEL1	ccr	a	-0.448754	16.1052	2	0.153	0.17635	0.659	1	-0.296	-0.2724	0.341	843
rs136632707	10	56775088	WDR72	ccr	a	-0.430245	16.1048	2	0.186	0.22005	0.567	1	-0.244	-0.2102	0.433	844
rs137546002	1	133833175	ENSBTAG00000051032-U6	ccr	a	0.425706	16.0919	1	0.199	0.23516	0.531	2	-0.226	-0.19055	0.469	845
rs41609661	1	124290708	ENSBTAG00000049240(d)	ccr	a	0.42422	16.0678	1	0.199	0.22502	0.532	2	-0.226	-0.1992	0.468	846
rs42897430	1	143323907	CRYAA-SIK1	ccr	a	0.609235	16.059	1	0.0905	0.12293	0.851	2	-0.519	-0.48631	0.149	847
rs110014344	1	136433033	ENSBTAG00000049758-ENSBTAG00000049044	ccr	a	0.558852	16.0238	1	0.0994	0.13778	0.822	2	-0.459	-0.42107	0.178	848
BTA-73902-no-rs	5	71176976	SYN3	ccr	a	0.420599	16.0181	1	0.204	0.22989	0.514	2	-0.216	-0.19071	0.486	849
rs109227365	1	127609336	ZBTB38	ccr	a	-0.477638	16.0105	2	0.351	0.37864	0.265	1	-0.126	-0.099	0.735	850
rs134815435	15	65960236	PAMR1	ccr	a	0.635638	15.994	1	0.0842	0.12658	0.868	2	-0.551	-0.50905	0.132	851
rs135126530	5	29651199	LIMA1	ccr	a	0.531047	15.9792	1	0.427	0.45516	0.196	2	-0.104	-0.07588	0.804	852
rs133039879	5	90236516	5S-rRNA-ENSBTAG00000054482	ccr	a	0.48438	15.9646	1	0.128	0.16158	0.736	2	-0.357	-0.3228	0.264	853
rs137246237	13	36354959	MPP7	ccr	a	0.433808	15.9629	1	0.166	0.1924	0.617	2	-0.268	-0.24141	0.383	854
rs134085221	1	128680863	CLSTN2	ccr	a	-0.440617	15.9341	2	0.285	0.31227	0.352	1	-0.155	-0.12834	0.648	855
rs133462101	5	75275309	NCF4	ccr	a	0.421594	15.9328	1	0.234	0.25964	0.445	2	-0.188	-0.16195	0.555	856
rs133589532	14	49517537	ENSBTAG00000049675(d)	ccr	a	-0.504449	15.9228	2	0.112	0.13833	0.778	1	-0.392	-0.36612	0.222	857
rs29012019	10	55539558	ENSBTAG00000045196-UNC13C	ccr	a	0.43677	15.9128	1	0.155	0.18121	0.645	2	-0.282	-0.25556	0.355	858
rs41618401	1	123869462	5S-rRNA-ENSBTAG00000049240	ccr	a	0.429576	15.9119	1	0.169	0.19563	0.606	2	-0.26	-0.23394	0.394	859
rs137494244	1	122055532	PLSCR1	ccr	a	0.430815	15.9063	1	0.257	0.28271	0.403	2	-0.174	-0.14811	0.597	860
rs137570808	13	53714681	MYT1	ccr	a	0.439538	15.8955	1	0.151	0.17756	0.656	2	-0.288	-0.26198	0.344	861
rs3423366925	14	36154706	KCNB2	ccr	a	-0.431844	15.8936	2	0.162	0.18874	0.624	1	-0.269	-0.2431	0.376	862
rs133166820	14	43158811	MRPS28	ccr	a	0.417137	15.883	1	0.213	0.2395	0.489	2	-0.204	-0.17763	0.511	863
rs109226252	1	69009734	KALRN	ccr	a	-0.848046	15.8746	2	0.0562	0.0854	0.934	1	-0.792	-0.76264	0.0663	864
rs137597415	5	77254884	FGD4	ccr	a	-0.442761	15.8663	2	0.291	0.31127	0.343	1	-0.152	-0.13149	0.657	865
rs109774386	14	73814641	OSGIN2	ccr	a	-0.417108	15.8617	2	0.211	0.23734	0.493	1	-0.206	-0.17977	0.507	866
rs41890154	18	55405042	FGF21-BCAT2	ccr	a	0.437407	15.8531	1	0.2	0.25053	0.544	2	-0.238	-0.18687	0.456	867
rs134315345	9	78816495	ENSBTAG00000052619-ENSBTAG00000054729	ccr	a	0.451513	15.8523	1	0.15	0.19019	0.667	2	-0.301	-0.26132	0.333	868
rs110918424	14	51979740	CSMD3	ccr	a	-0.419986	15.8489	2	0.217	0.24969	0.483	1	-0.203	-0.1703	0.517	869
rs110669538	18	52094939	ZNF45	ccr	a	-0.422618	15.8443	2	0.248	0.27471	0.413	1	-0.174	-0.14791	0.587	870
rs110678609	10	58529252	TMOD3	ccr	a	-0.445729	15.8442	2	0.15	0.18194	0.665	1	-0.296	-0.26379	0.335	871
rs43390605	4	46921993	ATXN7L1	ccr	a	-0.425489	15.8347	2	0.174	0.20128	0.591	1	-0.251	-0.2242	0.409	872
rs135666366	9	41813508	AFG1L	ccr	a	-0.663237	15.833	2	0.586	0.60415	0.116	1	-0.0768	-0.05909	0.884	873
rs134934880	14	61450698	ATP6V1C1	ccr	a	0.554325	15.828	1	0.0955	0.1228	0.828	2	-0.459	-0.43153	0.172	874
rs41666416	10	67857752	ATG14	ccr	a	-0.443454	15.8198	2	0.148	0.17516	0.666	1	-0.295	-0.26829	0.334	875
rs135155476	3	50368995	MTF2	ccr	a	0.441126	15.8108	1	0.286	0.31249	0.351	2	-0.155	-0.12864	0.649	876
rs29010083	15	80305579	OR5AK30-LRRC55	ccr	a	-0.416587	15.8064	2	0.205	0.23122	0.509	1	-0.212	-0.18537	0.491	877
rs42962572	1	142310139	ZBTB21-UMODL1	ccr	a	0.608568	15.796	1	0.0877	0.12685	0.856	2	-0.521	-0.48172	0.144	878
rs133450760	1	68949628	KALRN	ccr	a	0.692202	15.795	1	0.0706	0.09988	0.898	2	-0.622	-0.59232	0.102	879
rs133561929	15	70262112	5S-rRNA-LRRC4C	ccr	a	0.447008	15.7679	1	0.288	0.32977	0.356	2	-0.159	-0.11723	0.644	880
rs109426100	3	56535348	ENSBTAG00000054817-ENSBTAG00000052091	ccr	a	-0.419241	15.7638	2	0.188	0.21435	0.552	1	-0.232	-0.20489	0.448	881
rs110721627	14	33981693	NCOA2	ccr	a	0.423821	15.7506	1	0.177	0.20502	0.583	2	-0.247	-0.2188	0.417	882
rs110337633	3	58342858	ENSBTAG00000048312-ZNHIT6	ccr	a	0.420023	15.7347	1	0.198	0.23064	0.529	2	-0.222	-0.18938	0.471	883
rs41582213	1	131440746	SOX14(d)	ccr	a	0.416605	15.7245	1	0.212	0.23852	0.49	2	-0.204	-0.17809	0.51	884
rs41592041	4	83287626	LSM8(d)	ccr	a	-0.536517	15.7183	2	0.0999	0.12887	0.814	1	-0.437	-0.40764	0.186	885
rs41904230	19	23146413	SMG6	ccr	a	-0.64175	15.6936	2	0.562	0.5875	0.125	1	-0.08	-0.05425	0.875	886
BTB-01205481	5	33629723	SLC38A4-ENSBTAG00000049143	ccr	a	0.423828	15.6823	1	0.256	0.28237	0.396	2	-0.168	-0.14146	0.604	887
rs43268059	1	130204834	FOXL2-PIK3CB	ccr	a	0.465594	15.6771	1	0.129	0.15494	0.723	2	-0.337	-0.31065	0.277	888
rs42735797	5	29606401	FAM186A-U6	ccr	a	0.532332	15.6769	1	0.429	0.45624	0.194	2	-0.103	-0.07609	0.806	889
rs109179791	15	72577992	ENSBTAG00000051591(d)	ccr	a	-0.419024	15.676	2	0.234	0.25961	0.442	1	-0.185	-0.15941	0.558	890
rs136555966	1	146877448	ENSBTAG00000046447	ccr	a	-0.527922	15.6732	2	0.421	0.462	0.202	1	-0.107	-0.06592	0.798	891
rs110424525	6	84224086	ENSBTAG00000048013-ENSBTAG00000051713	ccr	a	-0.417632	15.6632	2	0.233	0.25709	0.442	1	-0.185	-0.16054	0.558	892
rs41886137	18	44452933	ENSBTAG00000050669-LSM14A	ccr	a	0.493687	15.6605	1	0.114	0.14121	0.77	2	-0.38	-0.35247	0.23	893
rs110265658	19	23145339	SMG6	ccr	a	0.641001	15.6527	1	0.561	0.58658	0.125	2	-0.0798	-0.05442	0.875	894
rs133559615	18	46545843	NPHS1	ccr	a	-0.575614	15.6483	2	0.0885	0.1121	0.846	1	-0.487	-0.46351	0.154	895
rs29020824	1	122064888	PLSCR1	ccr	a	0.423671	15.6443	1	0.253	0.27964	0.403	2	-0.171	-0.14403	0.597	896
rs41692756	13	55474114	CDH4	ccr	a	0.480967	15.6436	1	0.118	0.14485	0.754	2	-0.363	-0.33611	0.246	897
rs110406190	5	28075511	SCN8A	ccr	a	0.433135	15.6347	1	0.275	0.30954	0.365	2	-0.158	-0.12359	0.635	898
rs137240553	3	78805735	SGIP1	ccr	a	0.638638	15.6296	1	0.0777	0.1063	0.878	2	-0.561	-0.53233	0.122	899
rs133303871	11	86688042	ENSBTAG00000051605	ccr	a	-0.499765	15.6247	2	0.382	0.43307	0.236	1	-0.118	-0.06669	0.764	900
rs43436384	5	73762135	RASD2-MB	ccr	a	-0.475437	15.6172	2	0.351	0.38482	0.262	1	-0.125	-0.09062	0.738	901
rs41659291	4	81185186	ENSBTAG00000054825-RALA	ccr	a	0.419995	15.6159	1	0.178	0.20637	0.576	2	-0.242	-0.21362	0.424	902
rs137068943	14	44288408	PAG1	ccr	a	0.476159	15.6115	1	0.125	0.14628	0.737	2	-0.351	-0.32988	0.263	903
rs110618422	5	75347213	NCF4-CSF2RB	ccr	a	-0.417497	15.6048	2	0.232	0.25934	0.444	1	-0.186	-0.15816	0.556	904
rs41779930	15	70392722	5S-rRNA-LRRC4C	ccr	a	0.494245	15.6021	1	0.381	0.40659	0.229	2	-0.113	-0.08766	0.771	905
rs136262330	15	67474183	IFTAP(d)	ccr	a	0.464666	15.5863	1	0.14	0.16766	0.699	2	-0.325	-0.297	0.301	906
rs42255841	3	68443615	ENSBTAG00000053587	ccr	a	-0.419061	15.585	2	0.178	0.20314	0.575	1	-0.241	-0.21593	0.425	907
rs29015945	19	35808547	SPAG9-ENSBTAG00000049579	ccr	a	0.415911	15.5803	1	0.183	0.20898	0.561	2	-0.233	-0.20693	0.439	908
rs135221665	3	60652976	TTLL7-ENSBTAG00000050554	ccr	a	-0.425414	15.5768	2	0.194	0.2198	0.543	1	-0.231	-0.20562	0.457	909
rs43014245	6	78147926	ENSBTAG00000053291(d)	ccr	a	-0.612275	15.5667	2	0.0808	0.10703	0.868	1	-0.531	-0.50524	0.132	910
rs110793124	3	56644464	ENSBTAG00000052091-LMO4	ccr	a	-0.435678	15.566	2	0.287	0.31262	0.342	1	-0.149	-0.12305	0.658	911
rs41987452	1	118310100	RNF13	ccr	a	0.419247	15.5643	1	0.243	0.26906	0.421	2	-0.177	-0.15019	0.579	912
rs110332225	1	140754935	DSCAM	ccr	a	-0.475733	15.5595	2	0.122	0.14746	0.744	1	-0.354	-0.32827	0.256	913
rs109245427	11	88275211	ASAP2-bta-mir-2298	ccr	a	-0.478201	15.5585	2	0.358	0.38848	0.251	1	-0.12	-0.08972	0.749	914
rs41603139	14	57306810	ANGPT1(d)	ccr	a	0.451925	15.5532	1	0.134	0.16051	0.703	2	-0.318	-0.29142	0.297	915
rs109029759	1	122739161	PLOD2(d)	ccr	a	-0.450201	15.5414	2	0.138	0.16666	0.694	1	-0.312	-0.28354	0.306	916
rs109303611	11	89907416	RNF144A	ccr	a	0.460887	15.5331	1	0.332	0.36032	0.28	2	-0.129	-0.10056	0.72	917
rs42134584	1	143351500	CRYAA-SIK1	ccr	a	0.590659	15.528	1	0.0879	0.12387	0.851	2	-0.503	-0.46679	0.149	918
rs137280140	3	50135827	DR1-ENSBTAG00000055068	ccr	a	-0.43356	15.5214	2	0.281	0.30676	0.351	1	-0.152	-0.1268	0.649	919
rs110094547	14	44309555	PAG1	ccr	a	0.524294	15.5191	1	0.101	0.1272	0.808	2	-0.423	-0.39709	0.192	920
rs133313907	1	134081566	U6-EPHB1	ccr	a	-0.429443	15.5134	2	0.157	0.1864	0.634	1	-0.272	-0.24304	0.366	921
rs43265048	1	122562289	PLOD2(d)	ccr	a	-0.45285	15.5084	2	0.318	0.34414	0.297	1	-0.135	-0.10871	0.703	922
rs41595701	5	33560114	SLC38A4-ENSBTAG00000049143	ccr	a	0.413209	15.5025	1	0.221	0.2473	0.465	2	-0.192	-0.1659	0.535	923
rs42615752	5	86536675	SOX5	ccr	a	0.437539	15.5016	1	0.161	0.18938	0.632	2	-0.276	-0.24816	0.368	924
rs109510662	8	79823967	ENSBTAG00000053134-ENSBTAG00000054075	ccr	a	-0.430767	15.4967	2	0.155	0.18372	0.64	1	-0.276	-0.24705	0.36	925
rs3423198053	5	68744951	APPL2	ccr	a	-0.416369	15.4886	2	0.207	0.22901	0.502	1	-0.209	-0.18736	0.498	926
rs42194612	10	57107399	WDR72-ENSBTAG00000053915	ccr	a	-0.428216	15.4688	2	0.163	0.19229	0.619	1	-0.265	-0.23593	0.381	927
rs3423452768	18	48897136	PAK4	ccr	a	0.456325	15.4452	1	0.326	0.35251	0.285	2	-0.13	-0.10382	0.715	928
rs29023629	5	80957424	CCDC91(u)	ccr	a	0.450681	15.4387	1	0.136	0.16268	0.699	2	-0.315	-0.288	0.301	929
rs109984047	6	85110288	UGT2A1	ccr	a	0.434309	15.4381	1	0.269	0.29683	0.381	2	-0.165	-0.13748	0.619	930
rs110869054	11	88922785	ENSBTAG00000052273-ENSBTAG00000037793	ccr	a	-0.429703	15.4381	2	0.275	0.30445	0.361	1	-0.155	-0.12525	0.639	931
rs41663259	11	82290832	CYRIA-MYCN	ccr	a	-0.425405	15.4334	2	0.258	0.29216	0.395	1	-0.168	-0.13325	0.605	932
rs133231363	19	31880876	LOC112442639	ccr	a	-0.444162	15.43	2	0.157	0.17931	0.646	1	-0.287	-0.26486	0.354	933
rs109041924	9	44770151	PREP-POPDC3	ccr	a	-0.466829	15.4217	2	0.124	0.15	0.734	1	-0.343	-0.31683	0.266	934
rs42526539	1	128772530	CLSTN2	ccr	a	0.432271	15.421	1	0.281	0.30879	0.349	2	-0.151	-0.12348	0.651	935
rs109899807	1	69009235	KALRN	ccr	a	-0.797288	15.4172	2	0.0576	0.08416	0.928	1	-0.74	-0.71312	0.0722	936
rs110958148	1	143945784	AGPAT3	ccr	a	-0.455428	15.4134	2	0.138	0.17095	0.698	1	-0.318	-0.28447	0.302	937
rs137558699	19	37056324	NXPH3-NGFR	ccr	a	-0.422227	15.4036	2	0.167	0.19586	0.605	1	-0.255	-0.22637	0.395	938
rs41607859	3	52646737	BARHL2(d)	ccr	a	0.461399	15.3991	1	0.334	0.36048	0.276	2	-0.127	-0.10092	0.724	939
rs29012916	9	41057481	CEP57L1	ccr	a	0.538049	15.3962	1	0.443	0.46958	0.177	2	-0.0953	-0.06847	0.823	940
rs109042382	8	89864264	ENSBTAG00000054632-CDK20	ccr	a	-0.481231	15.3951	2	0.365	0.39113	0.242	1	-0.117	-0.0901	0.758	941
rs3423352427	14	35351128	EYA1-MSC	ccr	a	-0.41672	15.3896	2	0.232	0.25982	0.443	1	-0.185	-0.1569	0.557	942
rs42670220	20	39445232	RAI14	ccr	a	-0.468492	15.3857	2	0.122	0.14825	0.74	1	-0.347	-0.32024	0.26	943
rs134015092	9	68187279	L3MBTL3	ccr	a	-0.529753	15.3784	2	0.0998	0.12536	0.812	1	-0.43	-0.4044	0.188	944
rs110691328	9	68167066	ENSBTAG00000021446-L3MBTL3	ccr	a	0.551354	15.3755	1	0.0915	0.11817	0.834	2	-0.46	-0.43319	0.166	945
rs110586696	15	33341736	UBASH3B	ccr	a	0.411105	15.3621	1	0.191	0.21649	0.535	2	-0.22	-0.19462	0.465	946
rs3423092677	14	35731272	TRPA1-KCNB2	ccr	a	-0.460381	15.3555	2	0.129	0.15479	0.721	1	-0.332	-0.30559	0.279	947
rs133148557	14	41298034	U6-ENSBTAG00000050099	ccr	a	0.42786	15.3547	1	0.154	0.17829	0.64	2	-0.274	-0.24957	0.36	948
rs132725723	10	63849977	5S-rRNA(u)	ccr	a	0.422911	15.3511	1	0.178	0.20946	0.578	2	-0.244	-0.21345	0.422	949
rs134205142	4	85629921	CPED1	ccr	a	0.476877	15.351	1	0.122	0.15278	0.745	2	-0.355	-0.3241	0.255	950
rs43480825	6	101994654	AFF1	ccr	a	0.829117	15.3479	1	0.0545	0.08044	0.934	2	-0.775	-0.74867	0.0658	951
rs41617133	23	33109906	KIAA0319	ccr	a	-0.433294	15.339	2	0.151	0.17799	0.652	1	-0.283	-0.2553	0.348	952
rs133360023	10	65117841	GATM-SLC28A2	ccr	a	-0.425012	15.3373	2	0.168	0.1973	0.604	1	-0.257	-0.22771	0.396	953
rs3423199907	5	103520236	C5H12orf57	ccr	a	0.474703	15.3348	1	0.119	0.14183	0.749	2	-0.355	-0.33287	0.251	954
rs42426692	17	66043038	SEZ6L	ccr	a	0.512516	15.3276	1	0.405	0.43858	0.209	2	-0.107	-0.07394	0.791	955
rs110158984	1	144528438	TSPEAR	ccr	a	-0.510214	15.3251	2	0.105	0.12992	0.794	1	-0.405	-0.3803	0.206	956
rs110719818	5	26323411	U6-CALCOCO1	ccr	a	0.424761	15.3158	1	0.166	0.19951	0.61	2	-0.259	-0.22525	0.39	957
rs110805835	19	17653007	MYO1D	ccr	a	0.4792	15.3122	1	0.347	0.38798	0.275	2	-0.132	-0.09122	0.725	958
rs109177293	5	32372596	VDR	ccr	a	-0.509342	15.283	2	0.402	0.43846	0.21	1	-0.107	-0.07088	0.79	959
rs3423302024	10	64737360	SQOR(u)	ccr	a	0.435285	15.2754	1	0.155	0.18804	0.644	2	-0.28	-0.24724	0.356	960
rs133832615	1	60497520	LSAMP	ccr	a	-0.891258	15.2709	2	0.051	0.07717	0.943	1	-0.84	-0.81409	0.0573	961
rs109923958	1	119445243	CPB1-AGTR1	ccr	a	0.412478	15.2685	1	0.198	0.22158	0.519	2	-0.214	-0.1909	0.481	962
rs43745960	5	83283306	ITPR2	ccr	a	0.415639	15.2666	1	0.234	0.25988	0.438	2	-0.182	-0.15576	0.562	963
rs133368757	1	120361533	ENSBTAG00000050282(d)	ccr	a	-0.468551	15.2597	2	0.348	0.37518	0.258	1	-0.121	-0.09337	0.742	964
rs137785235	5	75410757	ENSBTAG00000032114-TEX33	ccr	a	-0.413657	15.2597	2	0.231	0.2545	0.442	1	-0.183	-0.15916	0.558	965
rs41609211	9	44603627	PREP	ccr	a	-0.502485	15.2565	2	0.105	0.13149	0.791	1	-0.397	-0.371	0.209	966
rs133437045	11	80390058	RDH14-ENSBTAG00000051528	ccr	a	0.593191	15.2473	1	0.51	0.53832	0.141	2	-0.0836	-0.05487	0.859	967
rs133682968	10	58658013	SCG3	ccr	a	0.44637	15.2389	1	0.136	0.16308	0.695	2	-0.31	-0.28329	0.305	968
rs109081719	9	75754987	TNFAIP3	ccr	a	-0.446456	15.2266	2	0.135	0.15831	0.698	1	-0.312	-0.28814	0.302	969
rs110776492	3	45978363	DPYD	ccr	a	-0.519266	15.2164	2	0.101	0.13288	0.805	1	-0.418	-0.38639	0.195	970
rs41576433	15	70560636	ENSBTAG00000049512	ccr	a	-0.485432	15.2121	2	0.373	0.39976	0.231	1	-0.112	-0.08567	0.769	971
rs42552675	8	82756766	ERCC6L2-ENSBTAG00000053599	ccr	a	-0.434383	15.206	2	0.144	0.17006	0.669	1	-0.291	-0.26432	0.331	972
rs110736071	18	39924747	ENSBTAG00000051512	ccr	a	-0.409278	15.2054	2	0.202	0.22761	0.507	1	-0.207	-0.18167	0.493	973
rs42402805	15	62405773	ELP4	ccr	a	-0.472899	15.1957	2	0.118	0.14537	0.75	1	-0.355	-0.32753	0.25	974
rs134691243	1	116818789	MED12L	ccr	a	-0.544375	15.188	2	0.451	0.47686	0.171	1	-0.0932	-0.06752	0.829	975
rs3423197370	5	68726831	APPL2	ccr	a	-0.414215	15.1875	2	0.206	0.22708	0.502	1	-0.208	-0.18713	0.498	976
rs110142098	3	52839872	BARHL2-ZNF326	ccr	a	0.419505	15.1864	1	0.163	0.18934	0.612	2	-0.257	-0.23017	0.388	977
rs134860419	14	43894593	ZNF704	ccr	a	0.417681	15.1827	1	0.186	0.20576	0.555	2	-0.232	-0.21192	0.445	978
rs41597420	7	7841810	BRD4	ccr	a	-0.410583	15.1761	2	0.191	0.21743	0.535	1	-0.22	-0.19315	0.465	979
rs109800511	1	98360380	MECOM-ENSBTAG00000054693	ccr	a	-0.673042	15.1702	2	0.604	0.63007	0.102	1	-0.0688	-0.04298	0.898	980
rs42396867	5	89004550	SLCO1B3-SLCO1C1	ccr	a	-0.67944	15.169	2	0.0692	0.09625	0.898	1	-0.61	-0.58319	0.102	981
rs42371092	6	61697427	GRXCR1	ccr	a	-0.412994	15.1651	2	0.234	0.26102	0.434	1	-0.179	-0.15198	0.566	982
rs211451565	11	38640411	LOC107132925	ccr	a	-0.419783	15.1456	2	0.159	0.18303	0.622	1	-0.261	-0.23675	0.378	983
rs134452730	5	67279432	STAB2	ccr	a	-0.408647	15.1059	2	0.209	0.23232	0.489	1	-0.2	-0.17632	0.511	984
rs137027514	1	114541369	ENSBTAG00000048392-RAP2B	ccr	a	0.545858	15.0997	1	0.452	0.47119	0.172	2	-0.094	-0.07467	0.828	985
rs41942366	20	41041011	NPR3-SUB1	ccr	a	0.464484	15.0682	1	0.122	0.15361	0.736	2	-0.342	-0.31087	0.264	986
rs29011081	21	9132412	ARRDC4(d)	ccr	a	-0.442032	15.0661	2	0.133	0.15975	0.698	1	-0.309	-0.28228	0.302	987
rs109244995	15	76721084	CKAP5	ccr	a	-0.410805	15.0497	2	0.219	0.24254	0.466	1	-0.191	-0.16826	0.534	988
rs41782443	15	74489593	ALX4-CD82	ccr	a	0.413876	15.0473	1	0.192	0.22572	0.537	2	-0.222	-0.18815	0.463	989
rs110074899	14	54299441	U5-KCNV1	ccr	a	-0.412629	15.0428	2	0.176	0.1929	0.573	1	-0.237	-0.21972	0.427	990
rs133576834	5	93369146	LMO3-MGST1	ccr	a	0.432374	15.0361	1	0.155	0.19361	0.64	2	-0.277	-0.23877	0.36	991
rs42254030	8	81454750	AOPEP	ccr	a	0.416637	15.0239	1	0.252	0.27885	0.394	2	-0.164	-0.13778	0.606	992
rs41590554	8	78350218	NTRK2	ccr	a	0.532131	15.0109	1	0.0941	0.12432	0.823	2	-0.438	-0.40781	0.177	993
rs135395848	1	112560358	MME	ccr	a	-0.459048	15.0083	2	0.126	0.14707	0.725	1	-0.333	-0.31197	0.275	994
rs108971189	23	32525100	CARMIL1	ccr	a	-0.406445	15.0076	2	0.198	0.22635	0.512	1	-0.208	-0.1801	0.488	995
rs43479297	6	92318177	CXCL13-CNOT6L	ccr	a	0.509497	15.0067	1	0.408	0.43349	0.2	2	-0.102	-0.07601	0.8	996
rs29013890	20	34800041	U2(u)	ccr	a	-0.570407	15.004	2	0.0853	0.10997	0.851	1	-0.485	-0.46043	0.149	997
rs134186285	3	56695480	ENSBTAG00000052091-LMO4	ccr	a	-0.415278	14.9992	2	0.252	0.27865	0.393	1	-0.163	-0.13663	0.607	998
rs137464422	1	146888322	ENSBTAG00000046447-RUNX1	ccr	a	0.427896	14.9965	1	0.158	0.19883	0.632	2	-0.27	-0.22906	0.368	999
rs110435921	6	82783932	CENPC(u)	ccr	a	-0.40733	14.9852	2	0.22	0.24683	0.459	1	-0.187	-0.1605	0.541	1000
'u’ indicates the SNP is upstream of the gene, and ‘d’ indicates the SNP is downstream of the gene.
‘effect’ is the additive effect of the SNP as the difference between allelic effects of ‘allele 1’ and ‘allele 2’ (Equation 10).
‘ae+’ is the allelic effect of the positive allele using Equation 9, and 'ae+2' the allelic effect of the positive allele using Equation 11
‘ae-’ is the allelic effect of the negative allele using Equation 9, and 'ae-2' is the allelic effect of the negative allele using Equation 11.
‘f_al+’ is the frequency of the positive allele. ‘f_al-’ is the requency of the negative allele.
