# Supplementary material for: A Million-Cow Genome-Wide Association Study of Three Fertility Traits in U.S. Holstein Cows
Source: Int J Mol Sci. 2023 Jun 22;24(13):10496. doi: 10.3390/ijms241310496 (PMC10341978; doi:10.3390/ijms241310496)
Supplement: Supplementary file 1 [file ijms-24-10496-s001.zip › Supplementary_materials/Table_S4.xlsx]

## Sheet: s4
SNP	Chr	position	Candidate gene	Trait	Test	Effect	log10(1/p)	DR	d_DR	f_DR	DD	d_DD	f_DD	RR	d_RR	f_RR	al+	ae+	f_al+	al-	ae-	f_al-	rank
rs41884737	18	43786051	CEBPG (u)	ccr	d	4.49905	69.0954	12	0.597	0.144	11	-0.0499	0.851	22	-7.75	0.0056	1	0.1	0.923	2	-1.19	0.0775	1
rs41885943	18	43854199	PEPD	ccr	d	4.32568	66.9348	12	0.588	0.147	11	-0.0504	0.847	22	-7.43	0.00589	1	0.1	0.921	2	-1.16	0.0795	2
rs43746558	18	44167440	CHST8	ccr	d	4.60729	65.1458	12	0.603	0.141	11	-0.0491	0.854	22	-7.96	0.00538	1	0.0981	0.924	2	-1.2	0.0757	3
rs133443778	18	43887966	PEPD	ccr	d	4.31632	59.3203	12	0.576	0.145	11	-0.0486	0.849	22	-7.43	0.0057	1	0.0969	0.922	2	-1.14	0.0782	4
rs43768813	6	101887271	AFF1	ccr	d	2.86819	21.1187	12	0.338	0.12	22	-0.0232	0.875	11	-5.04	0.00406	2	0.0531	0.936	1	-0.772	0.0643	5
rs109622162	18	43936602	PEPD	ccr	d	1.39973	20.798	12	0.323	0.251	22	-0.0542	0.73	11	-2.1	0.0198	2	0.116	0.855	1	-0.685	0.145	6
rs42739334	6	102065812	KLHL8	ccr	d	2.72372	20.0539	12	0.33	0.124	11	-0.0233	0.872	22	-4.77	0.00429	1	0.0594	0.934	2	-0.838	0.0662	7
rs109933750	6	102164971	U6-HSD17B13	ccr	d	2.73006	19.5006	12	0.322	0.123	22	-0.0225	0.873	11	-4.79	0.00414	2	0.0516	0.935	1	-0.736	0.0654	8
rs43480825	6	101994654	AFF1	ccr	d	2.671	18.8749	12	0.316	0.123	11	-0.0221	0.873	22	-4.69	0.00418	1	0.0545	0.934	2	-0.775	0.0658	9
rs110940015	18	43876270	PEPD	ccr	d	1.08694	13.5008	12	0.271	0.267	11	-0.0495	0.71	22	-1.58	0.0234	1	0.127	0.843	2	-0.684	0.157	10
rs110954907	18	50187257	ENSBTAG00000054384	ccr	d	1.29832	11.7882	12	0.248	0.2	11	-0.031	0.788	22	-2.07	0.0122	1	0.102	0.888	2	-0.808	0.112	11
rs111023007	4	23542497	AGMO (u)	ccr	d	2.04343	11.6321	12	0.224	0.137	11	-0.0175	0.859	22	-3.62	0.00433	1	0.0262	0.927	2	-0.334	0.0727	12
rs132847403	1	68792344	KALRN	ccr	d	2.57171	11.2988	12	0.256	0.0962	11	-0.0137	0.901	22	-4.62	0.00264	1	0.066	0.949	2	-1.23	0.0507	13
rs110035804	1	68293671	CCDC14	ccr	d	2.47869	10.7928	12	0.253	0.0984	11	-0.0139	0.899	22	-4.44	0.00278	1	0.0606	0.948	2	-1.1	0.052	14
rs108998049	18	44128299	CHST8	ccr	d	0.747753	10.481	12	0.235	0.327	22	-0.0595	0.633	11	-0.966	0.0406	2	0.152	0.796	1	-0.595	0.204	15
rs109785425	9	48907179	GRIK2-ASCC3	ccr	d	1.15787	10.2099	12	0.228	0.216	11	-0.0314	0.771	22	-1.83	0.0137	1	0.0433	0.878	2	-0.313	0.122	16
rs43595191	9	49192024	ASCC3	ccr	d	1.10502	9.7317	12	0.22	0.217	22	-0.0307	0.769	11	-1.74	0.014	2	0.0413	0.877	1	-0.295	0.123	17
rs110501948	18	44234300	LOC112442401	ccr	d	0.687799	9.6308	12	0.237	0.344	11	-0.0671	0.608	22	-0.834	0.0488	1	0.0578	0.779	2	-0.204	0.221	18
rs134873849	18	44380074	ENSBTAG00000050669	ccr	d	0.743593	9.4139	12	0.22	0.312	22	-0.0511	0.653	11	-0.997	0.0352	2	0.128	0.809	1	-0.541	0.191	19
rs109790791	1	69102381	KALRN	ccr	d	2.21192	9.2788	12	0.231	0.101	11	-0.0132	0.896	22	-3.95	0.00294	1	0.0651	0.946	2	-1.15	0.0535	20
rs109567975	18	45810571	HPN-ENSBTAG00000054525	ccr	d	0.710352	9.2784	12	0.221	0.321	22	-0.0548	0.64	11	-0.924	0.0389	2	0.106	0.801	1	-0.426	0.199	21
rs137814900	1	70735271	TFRC-ZDHHC19	ccr	d	1.7853	8.9912	12	0.229	0.123	11	-0.0163	0.873	22	-3.1	0.00449	1	0.0695	0.934	2	-0.987	0.0658	22
rs109205828	1	69012232	KALRN	ccr	d	1.89925	8.7371	12	0.217	0.116	11	-0.0142	0.881	22	-3.35	0.00376	1	0.0545	0.938	2	-0.83	0.0616	23
rs133559615	18	46545843	NPHS1	ccr	d	0.845831	8.6987	12	0.214	0.261	22	-0.0387	0.716	11	-1.22	0.0231	2	0.0885	0.846	1	-0.487	0.154	24
rs109899807	1	69009235	KALRN	ccr	d	1.59168	8.3856	12	0.216	0.134	22	-0.0168	0.861	11	-2.73	0.00527	2	0.0576	0.928	1	-0.74	0.0722	25
rs3423297865	9	88722921	ESR1	ccr	d	0.469285	8.3683	12	0.22	0.474	11	-0.137	0.383	22	-0.362	0.143	2	0.114	0.38	1	-0.0702	0.62	26
rs43767108	9	88739977	ESR1	ccr	d	0.46825	8.3321	12	0.219	0.474	11	-0.137	0.383	22	-0.361	0.143	2	0.115	0.38	1	-0.0703	0.62	27
'u’ indicates the SNP is upstream of the gene, and ‘d’ indicates the SNP is downstream of the gene.
‘effect’ is the dominance effect of the SNP as the difference between the heterozygous dominance value and the average of the two homozygous dominance values (Equation 12).
‘d_DR’ is the dominance value of the heterozygous genotype with one dominant allele (D) and one recessive allele (R) (Equation 13).
‘DR’ is the heterozygous genotype with one dominant allele and one recessive allele.
‘d_DR’ is the dominance value of the heterozygous genotype with one dominant allele (D) and one recessive allele (R) (Equation 13).
‘DD’ is the homozygous genotype with two dominant alleles.
‘d_DD’ is the dominance value of the homozygous genotype with two dominant alleles (DD) (Equation 13).
‘RR’ is the homozygous genotype with two recessive alleles.
‘d_RR’ is the dominance value of the homozygous genotype with two recessive alleles (RR) (Equation 13).
‘f_DR’ is the frequency of the heterozygous genotype.
‘f_DD’ is the frequency of the homozygous genotype of the dominant allele.
‘f_RR’ is the frequency of the homozygous genotype of the recessive allele. ‘f_R’ is the frequency of the recessive allele.
‘ae+’ is the allelic effect of the positive allele using Equation 9.
‘ae-’ is the allelic effect of the negative allele using Equation 9.
‘f_al+’ is the frequency of the positive allele. ‘f_al-’ is the requency of the negative allele.
