# Supplementary material for: A Million-Cow Genome-Wide Association Study of Three Fertility Traits in U.S. Holstein Cows
Source: Int J Mol Sci. 2023 Jun 22;24(13):10496. doi: 10.3390/ijms241310496 (PMC10341978; doi:10.3390/ijms241310496)
Supplement: Supplementary file 1 [file ijms-24-10496-s001.zip › Supplementary_materials/Table_S5.xlsx]

## Sheet: s5
SNP	Chr	position	Candidate gene	Trait	Test	Effect	log10(1/p)	al+	ae+	ae+2	f_al+	al-	ae-	ae-2	f_al-	rank
rs41911772	19	34170903	EPN2-GRAP	hcr	a	0.606313	27.918	1	0.174	0.20174	0.714	2	-0.433	-0.40458	0.286	1
rs42739334	6	102065812	KLHL8	hcr	a	1.02602	22.6511	1	0.0636	0.09328	0.938	2	-0.962	-0.93274	0.062	2
rs135712994	19	33421057	NCOR1	hcr	a	-0.501698	21.7084	2	0.182	0.20913	0.638	1	-0.32	-0.29257	0.362	3
rs110569179	19	34245953	SLC5A10-FAM83G	hcr	a	0.492931	21.6321	1	0.214	0.24702	0.565	2	-0.279	-0.24591	0.435	4
rs43480825	6	101994654	AFF1	hcr	a	0.988736	21.0669	1	0.0611	0.08867	0.938	2	-0.928	-0.90006	0.0618	5
rs110761858	19	33358794	NCOR1	hcr	a	-0.489126	20.8534	2	0.179	0.20802	0.633	1	-0.31	-0.28111	0.367	6
rs134340085	19	28503389	NTN1	hcr	a	0.515571	20.5607	1	0.154	0.18008	0.701	2	-0.362	-0.33549	0.299	7
rs43768813	6	101887271	AFF1	hcr	a	-0.985188	20.5588	2	0.0598	0.08954	0.939	1	-0.925	-0.89565	0.0607	8
rs109547103	19	30101489	ENSBTAG00000049618	hcr	a	0.513035	19.6489	1	0.142	0.16992	0.723	2	-0.371	-0.34311	0.277	9
rs109933750	6	102164971	U6-HSD17B13	hcr	a	-0.941884	18.9735	2	0.0578	0.08666	0.939	1	-0.884	-0.85522	0.0614	10
rs109086091	19	31844296	HS3ST3A1-COX10	hcr	a	-0.483112	18.9723	2	0.159	0.18291	0.671	1	-0.324	-0.3002	0.329	11
rs29015945	19	35808547	SPAG9-ENSBTAG00000049579	hcr	a	0.452122	18.672	1	0.191	0.21895	0.577	2	-0.261	-0.23317	0.423	12
rs135166134	19	31231460	ARHGAP44	hcr	a	-0.449795	18.1471	2	0.22	0.25057	0.51	1	-0.229	-0.19922	0.49	13
rs41641007	19	26224813	RABEP1	hcr	a	-0.462917	17.9417	2	0.157	0.18518	0.661	1	-0.306	-0.27774	0.339	14
rs3423456831	19	26278782	LOC101904050	hcr	a	0.638919	17.3001	1	0.554	0.58272	0.133	2	-0.0851	-0.0562	0.867	15
rs133654564	19	31638013	ENSBTAG00000052541-HS3ST3A1	hcr	a	-0.583562	17.2855	2	0.0999	0.12038	0.829	1	-0.484	-0.46318	0.171	16
rs110940549	19	33716989	SPECC1	hcr	a	0.519558	17.2547	1	0.113	0.14145	0.782	2	-0.406	-0.37811	0.218	17
rs3423444153	19	31479267	ENSBTAG00000052541-HS3ST3A1	hcr	a	0.434055	17.199	1	0.221	0.24521	0.491	2	-0.213	-0.18885	0.509	18
rs3423447585	19	31166010	MYOCD	hcr	a	-0.434828	17.1455	2	0.179	0.20818	0.588	1	-0.256	-0.22664	0.412	19
rs3423293217	9	70653077	ENSBTAG00000052671-ENSBTAG00000040489	hcr	a	-0.44443	16.7964	2	0.279	0.30986	0.371	1	-0.165	-0.13457	0.629	20
rs109265140	19	33518122	SPECC1	hcr	a	0.455454	16.6022	1	0.141	0.16765	0.691	2	-0.315	-0.2878	0.309	21
rs41910972	19	37237738	LOC112442650	hcr	a	-0.442418	16.5355	2	0.159	0.18533	0.641	1	-0.284	-0.25709	0.359	22
rs136046100	9	45451028	ENSBTAG00000053858-U6	hcr	a	0.454658	16.3483	1	0.139	0.16636	0.694	2	-0.315	-0.2883	0.306	23
rs43644469	10	62319499	SLC24A5-SEMA6D	hcr	a	-0.451155	16.3266	2	0.142	0.17142	0.684	1	-0.309	-0.27973	0.316	24
rs133160437	9	64820201	TBX18-CEP162	hcr	a	0.420597	16.296	1	0.186	0.21388	0.558	2	-0.235	-0.20672	0.442	25
rs110821341	19	32240834	HS3ST3B1	hcr	a	0.443308	16.2569	1	0.146	0.17439	0.67	2	-0.297	-0.26892	0.33	26
rs43644461	10	62313453	SLC24A5-SEMA6D	hcr	a	0.479097	16.0775	1	0.126	0.1579	0.737	2	-0.353	-0.32119	0.263	27
rs209707720	9	41006848	CEP57L1	hcr	a	0.435274	15.957	1	0.152	0.17916	0.65	2	-0.283	-0.25611	0.35	28
rs41915257	19	35804610	SPAG9-ENSBTAG00000049579	hcr	a	-0.455285	15.8676	2	0.13	0.15761	0.715	1	-0.325	-0.29768	0.285	29
rs41915208	19	34980655	MPRIP	hcr	a	0.413157	15.5777	1	0.203	0.23732	0.507	2	-0.21	-0.17584	0.493	30
rs110616095	7	49396693	PKD2L2	hcr	a	0.428561	15.5492	1	0.278	0.31137	0.351	2	-0.15	-0.11719	0.649	31
rs41585779	19	30999985	MYOCD-LOC112442638	hcr	a	0.504594	15.4217	1	0.103	0.13104	0.796	2	-0.402	-0.37356	0.204	32
rs110282352	10	58971737	GLDN	hcr	a	0.422652	15.4064	1	0.155	0.18609	0.634	2	-0.268	-0.23657	0.366	33
rs110854486	29	39461320	PAG11-ENSBTAG00000031483	hcr	a	0.4276	15.1129	1	0.141	0.16984	0.67	2	-0.286	-0.25776	0.33	34
rs133729181	19	32106657	COX10	hcr	a	0.405304	15.0729	1	0.233	0.26091	0.425	2	-0.172	-0.1444	0.575	35
rs109306990	15	45226254	OLFML1	hcr	a	0.415476	15.0627	1	0.157	0.18424	0.622	2	-0.259	-0.23123	0.378	36
rs111004845	19	27355811	SHBG-ATP1B2	hcr	a	-0.413502	15.0269	2	0.257	0.28672	0.377	1	-0.156	-0.12678	0.623	37
rs109579611	24	30489981	5S-rRNA-TAF4B	hcr	a	-0.407557	15.0208	2	0.195	0.22156	0.522	1	-0.213	-0.186	0.478	38
rs29012019	10	55539558	ENSBTAG00000045196-UNC13C	hcr	a	0.419701	15.0179	1	0.148	0.17562	0.648	2	-0.272	-0.24408	0.352	39
rs137767633	24	30480783	5S-rRNA-TAF4B	hcr	a	-0.407054	14.9845	2	0.194	0.22118	0.522	1	-0.213	-0.18587	0.478	40
rs109237967	24	30483767	5S-rRNA-TAF4B	hcr	a	0.407019	14.9805	1	0.194	0.22085	0.522	2	-0.213	-0.18617	0.478	41
rs109739119	24	30525170	TAF4B	hcr	a	-0.406702	14.9596	2	0.194	0.22085	0.522	1	-0.212	-0.18586	0.478	42
rs3423490753	24	30505298	TAF4B	hcr	a	-0.406289	14.9284	2	0.194	0.22025	0.522	1	-0.212	-0.18604	0.478	43
rs41915968	19	35735962	SPAG9	hcr	a	0.439277	14.9263	1	0.127	0.15568	0.71	2	-0.312	-0.2836	0.29	44
rs43640275	10	55465004	ENSBTAG00000045196-UNC13C	hcr	a	-0.41656	14.8701	2	0.148	0.17617	0.644	1	-0.268	-0.24039	0.356	45
rs109949592	13	67149685	KIAA1755-BPI	hcr	a	-0.463425	14.8642	2	0.114	0.14073	0.753	1	-0.349	-0.3227	0.247	46
rs41897673	1	111868602	SLC33A1-C1H3orf33	hcr	a	-0.430296	14.8291	2	0.135	0.16246	0.687	1	-0.296	-0.26784	0.313	47
rs3423092993	29	39535036	ENSBTAG00000013214	hcr	a	-0.421731	14.8245	2	0.142	0.17168	0.663	1	-0.28	-0.25005	0.337	48
rs111018873	10	54383190	RFX7-NEDD4	hcr	a	-0.431169	14.7462	2	0.133	0.1606	0.693	1	-0.299	-0.27057	0.307	49
rs29014914	9	48165396	GRIK2	hcr	a	-0.39663	14.5866	2	0.205	0.23672	0.482	1	-0.191	-0.15991	0.518	50
rs135686636	9	50490082	FAXC-FBXL4	hcr	a	-0.394522	14.4575	2	0.198	0.22623	0.499	1	-0.197	-0.1683	0.501	51
rs111023007	4	23542497	U6-ENSBTAG00000054772	hcr	a	0.727179	14.4499	1	0.0573	0.0849	0.921	2	-0.67	-0.64228	0.0788	52
rs136146234	19	33738493	U6-AKAP10	hcr	a	-0.394606	14.3867	2	0.231	0.25912	0.415	1	-0.164	-0.13549	0.585	53
rs136317366	24	30584805	TAF4B	hcr	a	-0.392059	14.3582	2	0.188	0.21766	0.521	1	-0.204	-0.1744	0.479	54
rs133546052	9	41013168	CEP57L1	hcr	a	0.418165	14.2661	1	0.136	0.16436	0.674	2	-0.282	-0.25381	0.326	55
rs109977481	7	49188204	KLHL3	hcr	a	0.403802	14.2445	1	0.25	0.28249	0.382	2	-0.154	-0.12131	0.618	56
rs134155197	9	51100167	POU3F2(d)	hcr	a	-0.39352	14.2051	2	0.172	0.20275	0.562	1	-0.221	-0.19077	0.438	57
rs137209107	1	68043046	MYLK	hcr	a	0.711387	14.1685	1	0.0595	0.08218	0.916	2	-0.652	-0.62921	0.0836	58
rs110357679	7	48945842	SPOCK1	hcr	a	-0.389788	14.1221	2	0.212	0.24003	0.456	1	-0.178	-0.14976	0.544	59
rs109137506	29	39334495	PAG3-PAG6	hcr	a	-0.395665	14.0207	2	0.155	0.18384	0.607	1	-0.24	-0.21182	0.393	60
rs29023731	4	23863959	AGMO	hcr	a	-0.702428	14.0199	2	0.0578	0.08537	0.918	1	-0.645	-0.61706	0.0823	61
rs109982425	19	30863864	MAP2K4-MYOCD	hcr	a	-0.447934	13.8665	2	0.109	0.13769	0.756	1	-0.339	-0.31024	0.244	62
rs137615022	9	65091707	TBX18-CEP162	hcr	a	-0.392217	13.8428	2	0.163	0.18679	0.584	1	-0.229	-0.20543	0.416	63
rs110525310	10	67706382	DLGAP5-FBXO34	hcr	a	0.422997	13.7939	1	0.124	0.15192	0.708	2	-0.299	-0.27107	0.292	64
rs43644495	10	62343829	SLC24A5-SEMA6D	hcr	a	-0.412314	13.6808	2	0.138	0.16869	0.666	1	-0.275	-0.24362	0.334	65
rs109146713	9	68381769	SAMD3-TMEM200A	hcr	a	0.382688	13.6743	1	0.186	0.21512	0.513	2	-0.196	-0.16756	0.487	66
rs109378680	29	39567592	ENSBTAG00000013214-ENSBTAG00000040257	hcr	a	-0.398227	13.6531	2	0.142	0.17201	0.643	1	-0.256	-0.22622	0.357	67
rs109667094	19	31718325	ENSBTAG00000052541-HS3ST3A1	hcr	a	0.451623	13.6357	1	0.112	0.13741	0.753	2	-0.34	-0.31421	0.247	68
rs43644483	10	62335147	SLC24A5-SEMA6D	hcr	a	0.411275	13.6099	1	0.137	0.16831	0.666	2	-0.274	-0.24297	0.334	69
rs41666416	10	67857752	ATG14	hcr	a	-0.408566	13.6074	2	0.132	0.16274	0.676	1	-0.276	-0.24582	0.324	70
rs43644506	10	62345768	SLC24A5-SEMA6D	hcr	a	-0.411007	13.5914	2	0.137	0.16811	0.666	1	-0.274	-0.2429	0.334	71
rs43644484	10	62336986	SLC24A5-SEMA6D	hcr	a	0.410987	13.5913	1	0.137	0.16807	0.666	2	-0.274	-0.24292	0.334	72
rs110440188	5	30336934	SPATS2	hcr	a	-0.491316	13.4373	2	0.0897	0.11318	0.817	1	-0.402	-0.37814	0.183	73
rs41566262	10	55804926	UNC13C	hcr	a	-0.407976	13.3685	2	0.129	0.15381	0.684	1	-0.279	-0.25416	0.316	74
rs3423559351	29	37959999	PAG7	hcr	a	-0.387775	13.3595	2	0.149	0.1766	0.615	1	-0.238	-0.21117	0.385	75
rs132872170	7	48939408	SPOCK1	hcr	a	-0.383547	13.3475	2	0.209	0.24206	0.455	1	-0.174	-0.14149	0.545	76
rs41914376	19	36844178	KAT7	hcr	a	0.377179	13.3406	1	0.187	0.21426	0.505	2	-0.191	-0.16292	0.495	77
rs133231363	19	31880876	LOC112442639	hcr	a	-0.408997	13.2992	2	0.14	0.16971	0.658	1	-0.269	-0.23929	0.342	78
rs110194833	19	33209863	LOC100847567	hcr	a	-0.581988	13.1825	2	0.0719	0.10952	0.876	1	-0.51	-0.47246	0.124	79
rs41911744	19	34281894	PRPSAP2	hcr	a	-0.391959	13.1631	2	0.251	0.27895	0.361	1	-0.141	-0.11301	0.639	80
rs29004006	5	30317353	SPATS2	hcr	a	0.502578	13.1388	1	0.0847	0.1088	0.831	2	-0.418	-0.39378	0.169	81
rs109264354	19	33377912	NCOR1	hcr	a	0.55166	13.1377	1	0.0732	0.10096	0.867	2	-0.478	-0.4507	0.133	82
rs41621822	19	31902307	LOC112442639	hcr	a	-0.385507	13.126	2	0.241	0.2695	0.374	1	-0.144	-0.11601	0.626	83
rs136632707	10	56775088	WDR72	hcr	a	-0.38286	13.1179	2	0.164	0.20213	0.57	1	-0.218	-0.18073	0.43	84
rs41905414	19	28212599	MYH10-U6	hcr	a	0.3984	13.1132	1	0.143	0.16463	0.641	2	-0.255	-0.23377	0.359	85
rs110091145	19	45042374	ARHGAP27	hcr	a	-0.635854	13.0384	2	0.0637	0.09322	0.9	1	-0.572	-0.54264	0.1	86
rs134439397	19	34721365	RAI1	hcr	a	0.571978	13.0287	1	0.0702	0.09847	0.877	2	-0.502	-0.47351	0.123	87
rs41905738	19	28197381	MYH10-U6	hcr	a	0.408642	13.0265	1	0.141	0.16934	0.655	2	-0.268	-0.2393	0.345	88
rs43702462	9	64819053	TBX18-CEP162	hcr	a	0.487983	13.0207	1	0.402	0.42949	0.176	2	-0.0861	-0.0585	0.824	89
rs41911801	19	34129335	EPN2	hcr	a	-0.579696	12.9969	2	0.0707	0.10686	0.878	1	-0.509	-0.47283	0.122	90
rs3423591360	29	37991651	PAG7	hcr	a	0.408052	12.9813	1	0.128	0.1486	0.687	2	-0.28	-0.25945	0.313	91
rs108941517	9	51072412	POU3F2(d)	hcr	a	-0.375483	12.9617	2	0.171	0.20247	0.545	1	-0.205	-0.17301	0.455	92
rs135896347	10	58776837	DMXL2	hcr	a	0.435565	12.9573	1	0.107	0.13117	0.755	2	-0.329	-0.30439	0.245	93
rs137802760	15	45682020	NLRP14	hcr	a	-0.40419	12.9291	2	0.272	0.29871	0.327	1	-0.132	-0.10548	0.673	94
rs109886612	6	100316951	ARHGAP24	hcr	a	0.515188	12.847	1	0.0836	0.1145	0.838	2	-0.432	-0.40069	0.162	95
rs134558649	9	40461146	FIG4	hcr	a	0.374494	12.846	1	0.175	0.19923	0.532	2	-0.199	-0.17526	0.468	96
rs29023417	13	65538388	DLGAP4	hcr	a	0.432923	12.7681	1	0.107	0.14383	0.754	2	-0.326	-0.2891	0.246	97
rs109045731	10	63317169	LOC782100	hcr	a	0.418309	12.7614	1	0.117	0.15609	0.72	2	-0.301	-0.26222	0.28	98
rs110048260	19	37306823	ZNF652	hcr	a	-0.37698	12.7599	2	0.165	0.19475	0.562	1	-0.212	-0.18223	0.438	99
rs109539384	19	26810848	bta-mir-497-BCL6B	hcr	a	-0.539247	12.7421	2	0.0733	0.10267	0.864	1	-0.466	-0.43658	0.136	100
rs110834581	9	51174622	POU3F2(d)	hcr	a	-0.387462	12.7394	2	0.135	0.16374	0.653	1	-0.253	-0.22373	0.347	101
rs41907619	19	34684653	RAI1	hcr	a	0.563647	12.7336	1	0.0688	0.09614	0.878	2	-0.495	-0.46751	0.122	102
rs41572851	9	44255231	PRDM1-PREP	hcr	a	0.369654	12.7077	1	0.185	0.2133	0.499	2	-0.185	-0.15635	0.501	103
rs135606652	19	26761696	ALOX12E-ENSBTAG00000053786	hcr	a	0.529909	12.6936	1	0.0743	0.10273	0.86	2	-0.456	-0.42718	0.14	104
rs41914162	19	35846897	ENSBTAG00000049579-TOB1	hcr	a	0.404502	12.6469	1	0.122	0.15462	0.698	2	-0.283	-0.24988	0.302	105
rs109936283	13	62434513	BPIFB4-BPIFA2A	hcr	a	0.377992	12.6411	1	0.151	0.17935	0.6	2	-0.227	-0.19864	0.4	106
rs43637158	10	55670655	UNC13C	hcr	a	-0.369037	12.6309	2	0.168	0.1962	0.545	1	-0.201	-0.17283	0.455	107
rs110281591	19	28615168	NTN1	hcr	a	0.376648	12.602	1	0.143	0.17128	0.62	2	-0.233	-0.20537	0.38	108
rs110240780	19	34064148	RNF112	hcr	a	0.486364	12.5626	1	0.0829	0.11442	0.83	2	-0.403	-0.37195	0.17	109
rs110128012	7	53551894	LOC100847454	hcr	a	-0.366293	12.5482	2	0.191	0.22111	0.478	1	-0.175	-0.14518	0.522	110
rs109038547	9	38862573	TRAF3IP2	hcr	a	0.391067	12.5195	1	0.126	0.1557	0.677	2	-0.265	-0.23537	0.323	111
rs41661266	7	52983007	KIAA0141	hcr	a	0.367851	12.5156	1	0.206	0.23389	0.441	2	-0.162	-0.13396	0.559	112
rs110219284	10	63356339	LOC782100	hcr	a	-0.393646	12.4447	2	0.124	0.1539	0.685	1	-0.27	-0.23974	0.315	113
rs29021678	10	66770420	BMP4-CDKN3	hcr	a	0.408706	12.4319	1	0.113	0.14346	0.724	2	-0.296	-0.26524	0.276	114
rs110055917	9	42376176	SCML4-SOBP	hcr	a	0.368472	12.4229	1	0.206	0.23137	0.442	2	-0.163	-0.1371	0.558	115
rs29021153	29	37570969	PAG10-PAG2	hcr	a	0.372409	12.4078	1	0.146	0.17418	0.607	2	-0.226	-0.19823	0.393	116
rs29020033	10	66795795	BMP4-CDKN3	hcr	a	0.406533	12.3328	1	0.113	0.14283	0.721	2	-0.293	-0.26371	0.279	117
rs42067930	8	40356820	ENSBTAG00000052736	hcr	a	-0.365198	12.3209	2	0.206	0.23423	0.435	1	-0.159	-0.13097	0.565	118
rs133002684	9	40640770	AK9	hcr	a	0.364818	12.3132	1	0.171	0.19916	0.532	2	-0.194	-0.16566	0.468	119
rs41611711	10	66672845	BMP4-CDKN3	hcr	a	0.406052	12.3131	1	0.113	0.1433	0.721	2	-0.293	-0.26275	0.279	120
rs109020305	9	40723035	PPIL6	hcr	a	-0.370056	12.2966	2	0.148	0.17628	0.599	1	-0.222	-0.19377	0.401	121
rs110915503	7	52249785	ENSBTAG00000049493	hcr	a	0.369914	12.271	1	0.224	0.25269	0.394	2	-0.146	-0.11722	0.606	122
rs133544645	10	65785069	DDHD1-U6	hcr	a	0.420274	12.2679	1	0.105	0.13708	0.749	2	-0.315	-0.2832	0.251	123
rs135715112	10	67262107	SAMD4A	hcr	a	0.392499	12.2562	1	0.123	0.1518	0.686	2	-0.269	-0.2407	0.314	124
rs136006978	4	28692421	TMEM196-MACC1	hcr	a	0.513079	12.2468	1	0.076	0.09588	0.852	2	-0.437	-0.41719	0.148	125
rs134356286	4	31857621	NUPL2	hcr	a	-0.364604	12.1923	2	0.2	0.21882	0.452	1	-0.165	-0.14579	0.548	126
rs110765469	29	47013097	FGF4-FGF3	hcr	a	0.364785	12.1698	1	0.201	0.23519	0.449	2	-0.164	-0.1296	0.551	127
rs110131854	13	61562114	CCM2L-HCK	hcr	a	0.409819	12.1299	1	0.108	0.13586	0.737	2	-0.302	-0.27396	0.263	128
rs43709254	13	65737670	SLA2	hcr	a	-0.421572	12.1098	2	0.102	0.12952	0.757	1	-0.319	-0.29205	0.243	129
rs109063227	19	26047065	NLRP1	hcr	a	-0.47752	12.1031	2	0.0813	0.10937	0.83	1	-0.396	-0.36815	0.17	130
rs134952764	4	37806628	PCLO	hcr	a	0.378539	12.1001	1	0.133	0.16516	0.648	2	-0.245	-0.21338	0.352	131
rs135863460	10	63302471	blank	hcr	a	-0.388373	12.0973	2	0.124	0.16045	0.68	1	-0.264	-0.22792	0.32	132
rs134811835	9	45606562	ENSBTAG00000053858-U6	hcr	a	0.377333	12.083	1	0.132	0.15776	0.651	2	-0.246	-0.21957	0.349	133
rs42617560	19	35925135	WFIKKN2-ENSBTAG00000042852	hcr	a	0.357709	12.0301	1	0.171	0.19844	0.523	2	-0.187	-0.15927	0.477	134
rs110060786	10	66081772	DDHD1-U6	hcr	a	0.391776	11.9811	1	0.126	0.16599	0.679	2	-0.266	-0.22578	0.321	135
rs110440544	19	31247817	ARHGAP44	hcr	a	-0.405416	11.9479	2	0.115	0.14609	0.716	1	-0.29	-0.25933	0.284	136
rs110698106	29	46700354	SNORD14-LTO1	hcr	a	-0.356942	11.9071	2	0.167	0.19556	0.532	1	-0.19	-0.16139	0.468	137
rs137713898	9	39601227	CDK19	hcr	a	-0.384479	11.9042	2	0.121	0.15308	0.685	1	-0.263	-0.2314	0.315	138
rs42187323	29	40277373	FADS1	hcr	a	0.367772	11.8958	1	0.138	0.16823	0.624	2	-0.23	-0.19954	0.376	139
rs135131156	19	40179713	IKZF3	hcr	a	-0.358389	11.8894	2	0.164	0.19639	0.542	1	-0.194	-0.16199	0.458	140
rs137814900	1	70735271	TFRC-ZDHHC19	hcr	a	0.750556	11.8765	1	0.0456	0.0765	0.939	2	-0.705	-0.67406	0.0608	141
rs109399960	19	30813030	MAP2K4-MYOCD	hcr	a	0.537396	11.8755	1	0.0694	0.09661	0.871	2	-0.468	-0.44079	0.129	142
rs3423184978	4	116108074	DPP6	hcr	a	0.366333	11.8586	1	0.202	0.25138	0.449	2	-0.164	-0.11495	0.551	143
rs109358597	13	65656406	MYL9-TGIF2	hcr	a	0.422583	11.8414	1	0.1	0.12704	0.763	2	-0.322	-0.29554	0.237	144
rs110837838	22	41780780	FHIT-ENSBTAG00000054841	hcr	a	0.357828	11.8354	1	0.196	0.22432	0.452	2	-0.162	-0.13351	0.548	145
rs41911355	19	36255597	ACSF2	hcr	a	-0.39621	11.8318	2	0.111	0.13839	0.72	1	-0.285	-0.25782	0.28	146
rs42216046	4	22331398	ETV1-DGKB	hcr	a	0.511182	11.7528	1	0.0712	0.09902	0.861	2	-0.44	-0.41216	0.139	147
rs110886371	19	35152019	USP22-ENSBTAG00000054465	hcr	a	-0.354423	11.7492	2	0.163	0.1915	0.539	1	-0.191	-0.16293	0.461	148
rs109541407	29	40229754	MYRF	hcr	a	-0.365904	11.7289	2	0.149	0.18534	0.594	1	-0.217	-0.18056	0.406	149
rs110360168	9	65629321	RIPPLY2-ENSBTAG00000026578	hcr	a	0.416828	11.706	1	0.0975	0.12705	0.766	2	-0.319	-0.28978	0.234	150
rs109955670	8	40171823	ENSBTAG00000048545-ENSBTAG00000052736	hcr	a	-0.356768	11.6952	2	0.207	0.2354	0.419	1	-0.149	-0.12137	0.581	151
rs136188251	10	66682632	BMP4-CDKN3	hcr	a	-0.398118	11.6803	2	0.108	0.14203	0.728	1	-0.29	-0.25609	0.272	152
rs41663640	10	63984589	5S-rRNA(d)	hcr	a	-0.392712	11.6795	2	0.111	0.14267	0.716	1	-0.281	-0.25004	0.284	153
rs136460595	10	62638476	SLC24A5-SEMA6D	hcr	a	-0.426023	11.6447	2	0.101	0.14656	0.762	1	-0.325	-0.27946	0.238	154
rs110739449	17	15056547	LOC112442091	hcr	a	0.359841	11.6402	1	0.217	0.24599	0.398	2	-0.143	-0.11385	0.602	155
rs42503854	4	26087114	AHR-U6	hcr	a	0.369405	11.6276	1	0.129	0.15391	0.65	2	-0.24	-0.21549	0.35	156
rs109546965	7	52331676	ENSBTAG00000049493-ENSBTAG00000030474-ENSBTAG00000050840	hcr	a	0.35239	11.5598	1	0.18	0.20929	0.49	2	-0.172	-0.1431	0.51	157
rs41667217	9	56167087	U6-ENSBTAG00000003743	hcr	a	0.533876	11.5512	1	0.468	0.49619	0.123	2	-0.0655	-0.03769	0.877	158
rs109611566	15	44256466	STK33-LMO1	hcr	a	-0.383548	11.5344	2	0.115	0.14301	0.7	1	-0.268	-0.24054	0.3	159
rs135189530	9	64447019	ENSBTAG00000052638-TBX18	hcr	a	-0.358519	11.5278	2	0.153	0.16871	0.573	1	-0.205	-0.18981	0.427	160
rs110306848	19	39431931	CWC25-C19H17orf98	hcr	a	0.36901	11.523	1	0.13	0.1665	0.647	2	-0.239	-0.20251	0.353	161
rs109446219	8	40125277	LOC112447748	hcr	a	0.356981	11.5175	1	0.197	0.21945	0.447	2	-0.159	-0.13753	0.553	162
rs110009344	10	66691455	BMP4-CDKN3	hcr	a	-0.39114	11.5127	2	0.112	0.13493	0.714	1	-0.279	-0.25621	0.286	163
rs43377794	4	28307693	FERD3L-POLR1F	hcr	a	-0.457107	11.4796	2	0.0808	0.10877	0.823	1	-0.376	-0.34834	0.177	164
rs43523701	7	56799109	PRELID2	hcr	a	-0.354746	11.4781	2	0.154	0.18352	0.566	1	-0.201	-0.17123	0.434	165
rs134276486	19	42826008	WNK4	hcr	a	0.634379	11.4498	1	0.0523	0.08146	0.918	2	-0.582	-0.55292	0.0825	166
rs41658330	8	81655976	FANCC	hcr	a	-0.374561	11.4366	2	0.124	0.15258	0.67	1	-0.251	-0.22198	0.33	167
rs108964836	7	48788678	SPOCK1	hcr	a	-0.350059	11.4177	2	0.185	0.21698	0.471	1	-0.165	-0.13308	0.529	168
rs109463504	19	42429361	STAT3	hcr	a	0.356401	11.405	1	0.215	0.24305	0.397	2	-0.142	-0.11335	0.603	169
rs109246420	10	63072990	SEMA6D(d)	hcr	a	-0.400944	11.3987	2	0.107	0.14439	0.734	1	-0.294	-0.25656	0.266	170
rs110469758	29	37368577	CD6-CD5	hcr	a	0.371359	11.3975	1	0.122	0.14952	0.672	2	-0.249	-0.22184	0.328	171
rs3423431774	19	26298780	SCIMP	hcr	a	0.48644	11.3646	1	0.0769	0.11392	0.842	2	-0.409	-0.37252	0.158	172
rs133604371	4	37911296	PCLO-CACNA2D1	hcr	a	-0.399628	11.3558	2	0.103	0.13963	0.743	1	-0.297	-0.26	0.257	173
rs133310538	29	40637681	INCENP-SCGB1D	hcr	a	-0.352809	11.349	2	0.145	0.17161	0.59	1	-0.208	-0.1812	0.41	174
rs42219605	10	68195126	ENSBTAG00000049100	hcr	a	-0.369092	11.337	2	0.129	0.15712	0.65	1	-0.24	-0.21197	0.35	175
rs3423445376	19	40960904	KRT25-KRT26	hcr	a	-0.34869	11.3296	2	0.157	0.18712	0.55	1	-0.192	-0.16157	0.45	176
rs43415168	21	44176995	NPAS3	hcr	a	0.399073	11.3244	1	0.287	0.32449	0.281	2	-0.112	-0.07458	0.719	177
rs109116362	10	67183570	SAMD4A	hcr	a	-0.347675	11.3123	2	0.178	0.2081	0.488	1	-0.17	-0.13958	0.512	178
rs42373432	9	52580587	MMS22L	hcr	a	0.469965	11.2943	1	0.0768	0.10705	0.837	2	-0.393	-0.36291	0.163	179
rs42359689	8	79925805	ENSBTAG00000054075-ENSBTAG00000054456	hcr	a	-0.395421	11.2867	2	0.103	0.13122	0.739	1	-0.292	-0.2642	0.261	180
rs109394828	19	47486375	TANC2	hcr	a	0.491766	11.2682	1	0.0708	0.0989	0.856	2	-0.421	-0.39286	0.144	181
rs41255949	10	66165480	U6-U6	hcr	a	0.346731	11.2117	1	0.161	0.18934	0.535	2	-0.185	-0.1574	0.465	182
rs42911227	29	40565850	FTH1-INCENP	hcr	a	0.349952	11.202	1	0.143	0.17086	0.59	2	-0.207	-0.17909	0.41	183
rs42360239	10	72512411	PPM1A-SIX6	hcr	a	-0.346003	11.1999	2	0.182	0.21035	0.473	1	-0.164	-0.13565	0.527	184
rs42231726	10	68265390	ENSBTAG00000049100	hcr	a	0.359148	11.1818	1	0.13	0.15818	0.638	2	-0.229	-0.20096	0.362	185
rs133531749	10	59807572	USP8	hcr	a	-0.399249	11.1733	2	0.106	0.13723	0.735	1	-0.293	-0.26202	0.265	186
rs41589127	10	63117991	SEMA6D(d)	hcr	a	-0.42105	11.1682	2	0.0907	0.11969	0.785	1	-0.33	-0.30136	0.215	187
rs110161395	7	52145120	PCDHAC2-PCDHB1	hcr	a	-0.347311	11.1667	2	0.18	0.21519	0.483	1	-0.168	-0.13212	0.517	188
rs136299358	9	71292789	RPS12-EYA4	hcr	a	0.392351	11.1586	1	0.102	0.13111	0.741	2	-0.291	-0.26124	0.259	189
rs133113044	8	40441007	GLIS3	hcr	a	0.375009	11.1457	1	0.256	0.27994	0.317	2	-0.119	-0.09507	0.683	190
rs137338584	10	65903077	DDHD1-U6	hcr	a	-0.39828	11.1385	2	0.105	0.14413	0.736	1	-0.293	-0.25415	0.264	191
rs133403851	10	65675506	DDHD1	hcr	a	-0.407694	11.1244	2	0.103	0.1468	0.747	1	-0.304	-0.2609	0.253	192
rs134054295	23	32599962	LOC537017	hcr	a	-0.403153	11.1164	2	0.307	0.33627	0.24	1	-0.0966	-0.06688	0.76	193
rs41604545	10	63714642	5S-rRNA(u)	hcr	a	0.417892	11.1065	1	0.0911	0.11902	0.782	2	-0.327	-0.29887	0.218	194
BovineHD1000016895	10	56707317	WDR72	hcr	a	0.345885	11.0912	1	0.177	0.20357	0.489	2	-0.169	-0.14231	0.511	195
rs109905158	8	40518213	GLIS3	hcr	a	-0.348078	11.0673	2	0.145	0.17284	0.584	1	-0.203	-0.17523	0.416	196
rs133360023	10	65117841	GATM-SLC28A2	hcr	a	-0.355806	11.0442	2	0.139	0.17697	0.608	1	-0.216	-0.17884	0.392	197
rs136103342	24	30564828	TAF4B	hcr	a	0.352943	11.0378	1	0.207	0.2384	0.413	2	-0.146	-0.11454	0.587	198
rs109860141	10	51496837	MINDY2	hcr	a	-0.404294	11.015	2	0.0955	0.124	0.764	1	-0.309	-0.28029	0.236	199
rs110846346	10	64842359	SQOR	hcr	a	0.406233	11.0137	1	0.098	0.13461	0.759	2	-0.308	-0.27162	0.241	200
rs42221124	10	68120124	KTN1-ENSBTAG00000049100	hcr	a	0.34283	11.0034	1	0.169	0.19847	0.508	2	-0.174	-0.14436	0.492	201
rs42190610	29	46767514	SNORD14-LTO1	hcr	a	-0.353817	11.0028	2	0.13	0.15833	0.632	1	-0.224	-0.19548	0.368	202
rs380023142	9	38992013	REV3L	hcr	a	0.391002	10.9943	1	0.101	0.13034	0.74	2	-0.29	-0.26066	0.26	203
rs133622984	9	50860360	FBXL4	hcr	a	0.427935	10.9605	1	0.0853	0.11383	0.801	2	-0.343	-0.31411	0.199	204
rs110722641	9	71463938	EYA4	hcr	a	0.340819	10.9336	1	0.18	0.20929	0.473	2	-0.161	-0.13152	0.527	205
rs41905486	19	33972021	LOC101902768-LOC112442640	hcr	a	0.444847	10.9256	1	0.0798	0.1096	0.821	2	-0.365	-0.33525	0.179	206
rs42337096	10	56739999	WDR72	hcr	a	0.342009	10.91	1	0.18	0.21025	0.475	2	-0.162	-0.13176	0.525	207
rs110365246	10	63091453	SEMA6D(d)	hcr	a	-0.383696	10.9032	2	0.104	0.13486	0.729	1	-0.28	-0.24884	0.271	208
rs109578031	19	37329256	ZNF652-PHOSPHO1	hcr	a	-0.370642	10.8994	2	0.254	0.28623	0.316	1	-0.117	-0.08441	0.684	209
rs136302802	9	70358174	MOXD1-STX7	hcr	a	0.341062	10.8803	1	0.188	0.21641	0.45	2	-0.153	-0.12465	0.55	210
rs41257332	19	33443229	TTC19	hcr	a	-0.350882	10.8364	2	0.21	0.24433	0.401	1	-0.141	-0.10655	0.599	211
rs136496819	9	69392418	AKAP7-ARG1	hcr	a	-0.353734	10.8334	2	0.219	0.24618	0.382	1	-0.135	-0.10755	0.618	212
rs133373402	10	64302051	5S-rRNA(d)	hcr	a	0.344685	10.8314	1	0.167	0.20683	0.514	2	-0.177	-0.13786	0.486	213
rs207730478	24	30578431	TAF4B	hcr	a	0.344974	10.8214	1	0.203	0.23313	0.413	2	-0.142	-0.11185	0.587	214
rs41903746	10	68473770	LOC101903945	hcr	a	0.347992	10.8176	1	0.153	0.18422	0.561	2	-0.195	-0.16377	0.439	215
rs41642643	19	25288372	KIAA0753	hcr	a	0.501342	10.8172	1	0.0665	0.09491	0.867	2	-0.435	-0.40644	0.133	216
rs110190049	24	30486009	5S-rRNA-TAF4B	hcr	a	0.345079	10.7962	1	0.203	0.23174	0.413	2	-0.143	-0.11334	0.587	217
rs136713971	29	40717251	SCGB2A2-ASRGL1	hcr	a	-0.365368	10.7926	2	0.124	0.16495	0.662	1	-0.242	-0.20042	0.338	218
rs110018955	10	64042546	5S-rRNA(d)	hcr	a	0.371966	10.7844	1	0.115	0.15352	0.691	2	-0.257	-0.21845	0.309	219
rs43379389	4	31051367	RAPGEF5	hcr	a	-0.394408	10.7817	2	0.0947	0.12268	0.76	1	-0.3	-0.27173	0.24	220
rs133039046	10	64795155	SQOR(u)	hcr	a	0.339247	10.7698	1	0.164	0.19504	0.518	2	-0.176	-0.14421	0.482	221
rs133651548	13	64483467	MMP24	hcr	a	0.351021	10.7218	1	0.13	0.15897	0.629	2	-0.221	-0.19205	0.371	222
rs110360656	10	68240833	ENSBTAG00000049100	hcr	a	0.35689	10.7217	1	0.122	0.15171	0.659	2	-0.235	-0.20518	0.341	223
rs41594021	1	116992366	MED12L	hcr	a	0.376316	10.7204	1	0.107	0.13823	0.717	2	-0.27	-0.23809	0.283	224
rs136630637	9	54812727	LOC112448133	hcr	a	-0.42469	10.7081	2	0.339	0.37578	0.202	1	-0.0856	-0.04891	0.798	225
rs110500404	10	68164248	KTN1-ENSBTAG00000049100	hcr	a	0.338119	10.7057	1	0.161	0.19229	0.525	2	-0.178	-0.14583	0.475	226
rs110483741	9	43949194	PRDM1(d)	hcr	a	0.440616	10.6942	1	0.362	0.39198	0.178	2	-0.0783	-0.04864	0.822	227
rs41625125	9	41128232	SESN1	hcr	a	-0.33914	10.6933	2	0.159	0.18724	0.532	1	-0.18	-0.1519	0.468	228
rs41616336	10	56658480	WDR72	hcr	a	0.338237	10.6864	1	0.18	0.20742	0.469	2	-0.159	-0.13081	0.531	229
rs137736637	9	46664991	U6-ENSBTAG00000043068	hcr	a	0.349261	10.6701	1	0.129	0.1585	0.631	2	-0.22	-0.19076	0.369	230
rs110333567	29	46871788	LTO1	hcr	a	-0.336918	10.6474	2	0.181	0.209	0.463	1	-0.156	-0.12792	0.537	231
rs135734043	9	71359980	RPS12-EYA4	hcr	a	-0.340081	10.6434	2	0.176	0.20589	0.481	1	-0.164	-0.13419	0.519	232
rs41766927	15	46544130	DNHD1	hcr	a	0.347822	10.6279	1	0.212	0.23896	0.391	2	-0.136	-0.10886	0.609	233
rs41597796	10	66129758	U6-U6	hcr	a	-0.338963	10.6203	2	0.168	0.20847	0.505	1	-0.171	-0.1305	0.495	234
rs110260958	10	54285197	RFX7	hcr	a	-0.344861	10.5988	2	0.135	0.16355	0.609	1	-0.21	-0.18131	0.391	235
rs42464988	2	41090099	KCNJ3(u)	hcr	a	0.336266	10.5976	1	0.178	0.20744	0.47	2	-0.158	-0.12883	0.53	236
rs109486152	9	40782045	ENSBTAG00000026637	hcr	a	0.339712	10.5921	1	0.149	0.17786	0.562	2	-0.191	-0.16186	0.438	237
rs109155375	1	62364649	bta-mir-2285de(u)	hcr	a	0.63601	10.589	1	0.0483	0.07813	0.924	2	-0.588	-0.55788	0.076	238
rs109846375	13	52931036	TGM3-STK35	hcr	a	-0.344044	10.5747	2	0.21	0.23872	0.389	1	-0.134	-0.10532	0.611	239
rs41621468	15	5847288	MMP1-ENSBTAG00000015818	hcr	a	0.404504	10.5611	1	0.0909	0.12396	0.775	2	-0.314	-0.28055	0.225	240
rs42910197	4	34161540	LOC101904927	hcr	a	-0.531098	10.56	2	0.0594	0.09281	0.888	1	-0.472	-0.43829	0.112	241
rs134192977	23	31548947	ENSBTAG00000048345-HMGN4	hcr	a	-0.340232	10.5568	2	0.147	0.17358	0.569	1	-0.193	-0.16665	0.431	242
rs109121616	10	63342580	LOC782100	hcr	a	0.353475	10.5504	1	0.122	0.15289	0.656	2	-0.232	-0.20059	0.344	243
rs110294702	10	64780249	SQOR(u)	hcr	a	-0.352017	10.5403	2	0.122	0.15045	0.654	1	-0.23	-0.20157	0.346	244
rs207725705	9	39088342	REV3L	hcr	a	0.382689	10.5278	1	0.0994	0.13063	0.74	2	-0.283	-0.25205	0.26	245
rs41594147	9	71493970	EYA4	hcr	a	-0.334167	10.5239	2	0.169	0.19681	0.494	1	-0.165	-0.13736	0.506	246
rs29020495	15	5758635	MMP12	hcr	a	-0.362866	10.5165	2	0.111	0.13946	0.693	1	-0.251	-0.2234	0.307	247
rs110809093	19	36491353	SGCA	hcr	a	-0.356206	10.5136	2	0.24	0.26716	0.327	1	-0.117	-0.08904	0.673	248
rs43549705	8	40696426	GLIS3	hcr	a	-0.337963	10.5106	2	0.172	0.19417	0.492	1	-0.166	-0.1438	0.508	249
rs41663465	9	73175040	HBS1L-MYB	hcr	a	-0.382559	10.5066	2	0.284	0.3148	0.258	1	-0.0987	-0.06776	0.742	250
rs110901772	10	60986053	GALK2	hcr	a	-0.335007	10.5054	2	0.161	0.18949	0.518	1	-0.174	-0.14552	0.482	251
rs133788338	6	100656964	ARHGAP24	hcr	a	0.390023	10.4928	1	0.0954	0.12285	0.755	2	-0.295	-0.26718	0.245	252
rs109408072	19	31571866	ENSBTAG00000052541-HS3ST3A1	hcr	a	0.484333	10.4853	1	0.0708	0.09906	0.854	2	-0.414	-0.38528	0.146	253
rs43566137	8	81712976	FANCC	hcr	a	0.340129	10.4673	1	0.147	0.17444	0.569	2	-0.194	-0.16569	0.431	254
rs42194612	10	57107399	WDR72-ENSBTAG00000053915	hcr	a	-0.347401	10.4436	2	0.13	0.15795	0.625	1	-0.217	-0.18945	0.375	255
rs109862645	13	62387115	BPIFB4	hcr	a	0.350021	10.4359	1	0.124	0.15616	0.646	2	-0.226	-0.19387	0.354	256
rs41661265	7	53053673	RNF14	hcr	a	-0.333726	10.4346	2	0.175	0.20347	0.475	1	-0.158	-0.13026	0.525	257
rs109514764	10	66503213	U6-BMP4	hcr	a	0.342618	10.4295	1	0.133	0.16363	0.612	2	-0.21	-0.17899	0.388	258
rs109780456	9	69514180	ARG1	hcr	a	-0.33803	10.4102	2	0.199	0.22734	0.411	1	-0.139	-0.11069	0.589	259
rs109859949	13	65582528	DLGAP4	hcr	a	-0.333542	10.3881	2	0.166	0.19659	0.501	1	-0.167	-0.13695	0.499	260
rs110177638	9	66326604	PTPRK	hcr	a	-0.345825	10.3802	2	0.125	0.15266	0.64	1	-0.221	-0.19317	0.36	261
rs110729832	10	67898830	TBPL2	hcr	a	-0.336335	10.361	2	0.145	0.16882	0.568	1	-0.191	-0.16752	0.432	262
rs41664735	9	63334709	SNORD22-U6	hcr	a	0.33144	10.3602	1	0.17	0.19819	0.487	2	-0.161	-0.13325	0.513	263
rs41257257	19	35125080	USP22	hcr	a	-0.348076	10.3555	2	0.224	0.25277	0.357	1	-0.124	-0.0953	0.643	264
rs109511274	10	68176383	ENSBTAG00000049100	hcr	a	0.360257	10.3499	1	0.112	0.13549	0.689	2	-0.248	-0.22477	0.311	265
rs109193448	2	62117471	ENSBTAG00000050570-RAB3GAP1	hcr	a	0.678303	10.3414	1	0.0436	0.07282	0.936	2	-0.635	-0.60549	0.0643	266
rs109150728	14	30354433	ENSBTAG00000053011-DNAJC5B	hcr	a	-0.331518	10.3362	2	0.173	0.20545	0.478	1	-0.158	-0.12607	0.522	267
rs109349372	10	66025732	DDHD1-U6	hcr	a	0.425728	10.3279	1	0.0832	0.12457	0.804	2	-0.342	-0.30116	0.196	268
rs43702530	7	53261474	NDFIP1-SPRY4	hcr	a	0.340919	10.3213	1	0.211	0.23945	0.38	2	-0.13	-0.10147	0.62	269
rs42624473	1	62488432	bta-mir-2285de(d)	hcr	a	-0.380976	10.3182	2	0.0998	0.13183	0.738	1	-0.281	-0.24915	0.262	270
rs42321070	9	51545402	blank	hcr	a	-0.45321	10.3182	2	0.381	0.41077	0.159	1	-0.0722	-0.04244	0.841	271
rs109784131	20	22665996	ENSBTAG00000051954-U6	hcr	a	0.397525	10.317	1	0.09	0.11974	0.774	2	-0.308	-0.27778	0.226	272
rs43639379	10	55499487	ENSBTAG00000045196-UNC13C	hcr	a	-0.42757	10.3161	2	0.0811	0.11439	0.81	1	-0.346	-0.31318	0.19	273
rs134476942	14	30356890	DNAJC5B	hcr	a	0.331034	10.3132	1	0.172	0.20163	0.479	2	-0.159	-0.1294	0.521	274
rs41734622	14	28128375	TTPA-YTHDF3	hcr	a	0.330989	10.3022	1	0.151	0.1795	0.542	2	-0.18	-0.15149	0.458	275
rs211020798	14	30354745	ENSBTAG00000053011-DNAJC5B	hcr	a	0.330769	10.2983	1	0.172	0.20217	0.479	2	-0.158	-0.1286	0.521	276
rs43772736	24	30783746	SS18-ENSBTAG00000050912	hcr	a	-0.333913	10.2931	2	0.189	0.21834	0.435	1	-0.145	-0.11557	0.565	277
rs109298172	1	62494500	bta-mir-2285de(d)	hcr	a	-0.377613	10.2928	2	0.0988	0.13014	0.738	1	-0.279	-0.24747	0.262	278
Hapmap23284-BTA-162040	15	6560689	YAP1	hcr	a	-0.344649	10.2769	2	0.126	0.15848	0.633	1	-0.218	-0.18617	0.367	279
rs135540241	9	49002057	GRIK2-ASCC3	hcr	a	-0.343722	10.2747	2	0.126	0.15606	0.635	1	-0.218	-0.18767	0.365	280
rs135068566	10	63863849	5S-rRNA(u)	hcr	a	0.378107	10.2701	1	0.103	0.13894	0.727	2	-0.275	-0.23917	0.273	281
rs133906461	4	37337238	SEMA3E-PCLO	hcr	a	-0.352726	10.2564	2	0.121	0.16085	0.656	1	-0.231	-0.19187	0.344	282
rs133450760	1	68949628	KALRN	hcr	a	0.558368	10.2501	1	0.0547	0.08452	0.902	2	-0.504	-0.47385	0.098	283
rs110616619	10	67355610	GCH1	hcr	a	-0.463832	10.2485	2	0.0703	0.10028	0.848	1	-0.394	-0.36355	0.152	284
rs109990157	13	60431498	SRXN1-TCF15	hcr	a	0.332516	10.2327	1	0.168	0.19283	0.494	2	-0.164	-0.13968	0.506	285
rs110254057	7	47516927	Vault-ENSBTAG00000052177	hcr	a	-0.381279	10.2282	2	0.286	0.3191	0.25	1	-0.0952	-0.06218	0.75	286
rs41763783	15	42518631	SBF2	hcr	a	0.340865	10.2052	1	0.139	0.1709	0.591	2	-0.201	-0.16997	0.409	287
rs110466918	10	63880738	5S-rRNA(u)	hcr	a	-0.399238	10.1984	2	0.0878	0.11831	0.78	1	-0.311	-0.28093	0.22	288
rs41571019	10	56608109	WDR72	hcr	a	-0.329997	10.1928	2	0.165	0.19529	0.501	1	-0.165	-0.13471	0.499	289
rs42358522	15	20441722	RDX-FDX1	hcr	a	-0.348593	10.1902	2	0.119	0.15105	0.658	1	-0.229	-0.19754	0.342	290
rs41593792	8	84472391	SUSD3-CARD19	hcr	a	0.488957	10.1839	1	0.0644	0.08924	0.868	2	-0.425	-0.39972	0.132	291
rs42768806	10	72063264	RTN1	hcr	a	-0.330337	10.1776	2	0.17	0.20215	0.485	1	-0.16	-0.12819	0.515	292
rs109753512	2	36080847	RBMS1-ITGB6	hcr	a	-0.333944	10.1729	2	0.141	0.16732	0.579	1	-0.193	-0.16663	0.421	293
rs132678555	10	58360318	MAPK6	hcr	a	-0.392906	10.165	2	0.0914	0.12494	0.767	1	-0.301	-0.26796	0.233	294
rs110401500	19	31252963	ARHGAP44	hcr	a	-0.347904	10.155	2	0.233	0.25977	0.33	1	-0.115	-0.08813	0.67	295
rs108988191	9	54193058	ENSBTAG00000052032-ENSBTAG00000051787	hcr	a	0.488546	10.1544	1	0.425	0.45314	0.13	2	-0.0634	-0.03541	0.87	296
rs135217126	10	72899465	MNAT1	hcr	a	0.330489	10.1402	1	0.18	0.20714	0.457	2	-0.151	-0.12334	0.543	297
rs109041622	19	44085411	SLC4A1-RUNDC3A	hcr	a	0.647008	10.136	1	0.0449	0.07491	0.931	2	-0.602	-0.5721	0.0694	298
rs43486866	6	101024656	MAPK10	hcr	a	-0.376315	10.1352	2	0.0971	0.12424	0.742	1	-0.279	-0.25207	0.258	299
rs133623052	10	66709863	BMP4-CDKN3	hcr	a	0.422682	10.0898	1	0.0795	0.10952	0.812	2	-0.343	-0.31316	0.188	300
rs43388554	4	37412325	SEMA3E-PCLO	hcr	a	0.327621	10.0867	1	0.155	0.18367	0.526	2	-0.172	-0.14395	0.474	301
rs41577556	19	47949401	MAP3K3	hcr	a	-0.342811	10.0796	2	0.121	0.14865	0.648	1	-0.222	-0.19416	0.352	302
rs29022375	13	65047766	PHF20	hcr	a	-0.333335	10.0703	2	0.137	0.16473	0.589	1	-0.196	-0.1686	0.411	303
rs136009461	9	64839482	TBX18-CEP162	hcr	a	0.341679	10.0579	1	0.125	0.14818	0.635	2	-0.217	-0.1935	0.365	304
rs109079564	3	79918232	LEPROT	hcr	a	-0.336329	10.0451	2	0.151	0.17029	0.551	1	-0.185	-0.16604	0.449	305
BovineHD1500006750	15	83996173	ENSBTAG00000053446-OR4A47WP	hcr	a	0.469672	10.037	1	0.0704	0.09693	0.85	2	-0.399	-0.37274	0.15	306
rs136875114	1	130963070	DBR1-A4GNT	hcr	a	0.459684	10.0232	1	0.0688	0.10352	0.85	2	-0.391	-0.35616	0.15	307
rs109946186	6	102066326	KLHL8	hcr	a	0.497339	10.0232	1	0.0612	0.08971	0.877	2	-0.436	-0.40763	0.123	308
rs43347835	3	79920032	LEPROT	hcr	a	0.335876	10.019	1	0.151	0.17013	0.551	2	-0.185	-0.16575	0.449	309
rs132929347	8	81662580	FANCC	hcr	a	-0.330766	10.015	2	0.142	0.17135	0.57	1	-0.189	-0.15941	0.43	310
rs43420802	4	113503432	AOC1-KCNH2	hcr	a	0.339101	10.0134	1	0.124	0.15212	0.635	2	-0.215	-0.18698	0.365	311
rs110460796	10	65801943	DDHD1-U6	hcr	a	-0.342023	10.0131	2	0.138	0.18363	0.596	1	-0.204	-0.15839	0.404	312
rs42185430	29	40527983	FTH1-INCENP	hcr	a	-0.337332	10.009	2	0.134	0.16825	0.603	1	-0.203	-0.16909	0.397	313
rs42624482	1	62490666	bta-mir-2285de(d)	hcr	a	-0.37523	9.998	2	0.098	0.12924	0.739	1	-0.277	-0.24599	0.261	314
rs110502730	19	27838415	AURKB	hcr	a	-0.353979	9.9942	2	0.108	0.13589	0.695	1	-0.246	-0.21809	0.305	315
rs134103459	10	69221747	OTX2	hcr	a	-0.347133	9.994	2	0.115	0.14527	0.668	1	-0.232	-0.20186	0.332	316
rs41726889	14	30710670	ADHFE1	hcr	a	0.345841	9.9907	1	0.231	0.25892	0.332	2	-0.115	-0.08692	0.668	317
rs109500157	10	67308009	SAMD4A-GCH1	hcr	a	0.415363	9.9886	1	0.0803	0.10925	0.807	2	-0.335	-0.30612	0.193	318
rs29015919	6	99898377	ENSBTAG00000052157(d)	hcr	a	-0.342581	9.9682	2	0.118	0.14666	0.654	1	-0.224	-0.19592	0.346	319
rs110767576	3	79933446	DNAJC6	hcr	a	-0.334925	9.9626	2	0.15	0.1689	0.551	1	-0.185	-0.16602	0.449	320
rs136096188	13	63918499	DYNLRB1-MAP1LC3A	hcr	a	-0.332819	9.9542	2	0.153	0.18232	0.54	1	-0.18	-0.1505	0.46	321
rs135978971	9	71245136	RPS12-EYA4	hcr	a	0.38328	9.931	1	0.0928	0.12323	0.758	2	-0.29	-0.26005	0.242	322
rs41611485	9	51217708	POU3F2(d)	hcr	a	0.334621	9.9286	1	0.128	0.15794	0.618	2	-0.207	-0.17668	0.382	323
rs136562908	24	31014203	SS18-ENSBTAG00000050912	hcr	a	0.330362	9.9271	1	0.184	0.21623	0.443	2	-0.146	-0.11413	0.557	324
rs133847062	19	22777382	PRPF8	hcr	a	-0.515866	9.9168	2	0.0596	0.09477	0.885	1	-0.456	-0.42109	0.115	325
rs110836683	10	26314075	ENSBTAG00000003769-ENSBTAG00000051988	hcr	a	-0.367436	9.9151	2	0.266	0.29672	0.275	1	-0.101	-0.07072	0.725	326
rs110351726	21	30510352	CIB2-IDH3A	hcr	a	0.37573	9.9065	1	0.0938	0.12194	0.75	2	-0.282	-0.25379	0.25	327
rs43352135	3	80529583	JAK1	hcr	a	-0.411943	9.887	2	0.0788	0.10682	0.809	1	-0.333	-0.30513	0.191	328
rs108946210	24	49840655	MYO5B-MBD1	hcr	a	0.34096	9.8688	1	0.117	0.14581	0.656	2	-0.224	-0.19515	0.344	329
rs42371092	6	61697427	GRXCR1	hcr	a	-0.326903	9.8592	2	0.184	0.21571	0.436	1	-0.143	-0.1112	0.564	330
rs109531261	13	45654946	ENSBTAG00000052659-ENSBTAG00000050649	hcr	a	0.476233	9.8539	1	0.413	0.44035	0.133	2	-0.0631	-0.03588	0.867	331
rs135655764	14	30326059	LOC104974036	hcr	a	0.329619	9.8539	1	0.174	0.19305	0.473	2	-0.156	-0.13657	0.527	332
rs41598426	11	43853640	SANBR	hcr	a	0.323068	9.8407	1	0.162	0.1904	0.499	2	-0.161	-0.13267	0.501	333
rs42950972	9	54071333	ENSBTAG00000052032-ENSBTAG00000051787	hcr	a	-0.483415	9.8286	2	0.421	0.45055	0.129	1	-0.0623	-0.03286	0.871	334
rs109535514	10	54662136	PRTG	hcr	a	0.3858	9.7932	1	0.0877	0.11634	0.773	2	-0.298	-0.26946	0.227	335
rs41589116	10	62238475	MYEF2	hcr	a	-0.326652	9.7764	2	0.141	0.16863	0.57	1	-0.186	-0.15802	0.43	336
rs137738035	10	68975386	PELI2-TMEM260	hcr	a	-0.334087	9.7752	2	0.13	0.15607	0.611	1	-0.204	-0.17801	0.389	337
rs3423235683	7	42857750	OR2AV11-OR2AZ3	hcr	a	-0.329417	9.7568	2	0.134	0.16701	0.592	1	-0.195	-0.16241	0.408	338
rs43485611	6	100187748	ARHGAP24	hcr	a	-0.334879	9.753	2	0.122	0.1504	0.636	1	-0.213	-0.18448	0.364	339
rs109439829	10	66058270	DDHD1-U6	hcr	a	0.351892	9.7471	1	0.114	0.15438	0.676	2	-0.238	-0.19752	0.324	340
rs3423470492	22	42342477	ENSBTAG00000050960-CFAP20DC	hcr	a	-0.325756	9.7441	2	0.174	0.20844	0.465	1	-0.151	-0.11732	0.535	341
rs3423302024	10	64737360	SQOR(u)	hcr	a	0.342252	9.7414	1	0.121	0.15944	0.648	2	-0.222	-0.18281	0.352	342
rs42513591	9	49032496	GRIK2-ASCC3	hcr	a	-0.335006	9.7391	2	0.122	0.15127	0.636	1	-0.213	-0.18374	0.364	343
rs109112702	10	60440273	LOC112448487	hcr	a	-0.328343	9.7233	2	0.14	0.16496	0.575	1	-0.189	-0.16338	0.425	344
rs110671724	29	47399453	FADD-ENSBTAG00000053788	hcr	a	0.322468	9.7225	1	0.164	0.19601	0.49	2	-0.158	-0.12646	0.51	345
rs132725723	10	63849977	5S-rRNA(u)	hcr	a	0.33092	9.7215	1	0.139	0.17766	0.579	2	-0.192	-0.15326	0.421	346
rs134044518	10	62244967	SLC24A5	hcr	a	-0.330255	9.7103	2	0.142	0.17158	0.571	1	-0.189	-0.15867	0.429	347
rs109441686	19	31930748	HS3ST3A1-COX10	hcr	a	0.330583	9.692	1	0.133	0.15295	0.597	2	-0.197	-0.17763	0.403	348
rs41838803	17	12493207	ZNF827	hcr	a	0.469117	9.6872	1	0.0677	0.09937	0.856	2	-0.401	-0.36975	0.144	349
rs109875550	10	66061716	DDHD1-U6	hcr	a	0.345325	9.6863	1	0.112	0.14906	0.675	2	-0.233	-0.19626	0.325	350
rs41648808	4	35407175	SEMA3D	hcr	a	-0.438503	9.6848	2	0.0693	0.09834	0.842	1	-0.369	-0.34017	0.158	351
rs109887315	10	26711899	TEP1	hcr	a	0.360667	9.6816	1	0.262	0.29084	0.272	2	-0.0982	-0.06983	0.728	352
rs110748688	10	58504555	TMOD3	hcr	a	-0.398592	9.6733	2	0.0818	0.11148	0.795	1	-0.317	-0.28711	0.205	353
rs42470942	9	55645778	ENSBTAG00000033083-U6	hcr	a	-0.450941	9.6683	2	0.384	0.41233	0.148	1	-0.0669	-0.03861	0.852	354
rs41631593	9	65838173	THEMIS	hcr	a	-0.429558	9.664	2	0.358	0.38732	0.166	1	-0.0712	-0.04224	0.834	355
rs41617724	1	89259959	U6-ENSBTAG00000050198	hcr	a	-0.674293	9.6527	2	0.0412	0.06927	0.939	1	-0.633	-0.60502	0.0611	356
rs41617819	3	73621024	NEGR1	hcr	a	-0.405031	9.65	2	0.079	0.10669	0.805	1	-0.326	-0.29834	0.195	357
rs132781871	10	66144928	U6-U6	hcr	a	-0.410362	9.6394	2	0.0781	0.10896	0.81	1	-0.332	-0.3014	0.19	358
rs43095974	7	42879707	LOC100300085	hcr	a	-0.325443	9.6393	2	0.133	0.16059	0.593	1	-0.193	-0.16486	0.407	359
rs110317026	13	67227599	LBP	hcr	a	-0.323761	9.635	2	0.139	0.16574	0.572	1	-0.185	-0.15802	0.428	360
rs41632265	13	67331350	LOC100847118	hcr	a	-0.325505	9.6228	2	0.134	0.1604	0.589	1	-0.192	-0.16511	0.411	361
rs137657533	15	45274519	SYT9	hcr	a	-0.322802	9.619	2	0.16	0.18123	0.505	1	-0.163	-0.14157	0.495	362
rs41898835	8	24109611	MLLT3-5S-rRNA	hcr	a	-0.513888	9.6086	2	0.0562	0.08381	0.891	1	-0.458	-0.43008	0.109	363
rs43598825	9	54016591	ENSBTAG00000052032-ENSBTAG00000051787	hcr	a	-0.411605	9.6054	2	0.335	0.36353	0.185	1	-0.0762	-0.04807	0.815	364
rs110388542	17	65824838	MYO18B-SEZ6L	hcr	a	0.327178	9.594	1	0.13	0.15559	0.604	2	-0.198	-0.17159	0.396	365
rs29010337	10	66327988	U6-U6	hcr	a	-0.411731	9.5926	2	0.0773	0.10783	0.812	1	-0.334	-0.3039	0.188	366
rs42297952	1	110325953	VEPH1	hcr	a	-0.363099	9.5888	2	0.0957	0.13152	0.736	1	-0.267	-0.23158	0.264	367
rs109611920	10	66542380	BMP4-CDKN3	hcr	a	0.319427	9.5767	1	0.159	0.18733	0.504	2	-0.161	-0.1321	0.496	368
rs42923229	8	84697531	WNK2	hcr	a	0.374534	9.5735	1	0.0906	0.11361	0.758	2	-0.284	-0.26093	0.242	369
rs109689804	17	11902545	SLC10A7	hcr	a	0.327135	9.5711	1	0.181	0.20939	0.447	2	-0.146	-0.11775	0.553	370
rs41912952	19	34041095	ENSBTAG00000048984-ENSBTAG00000048668	hcr	a	-0.410457	9.5658	2	0.0756	0.10383	0.816	1	-0.335	-0.30663	0.184	371
rs136119341	14	69761251	ESRP1-VIRMA	hcr	a	0.321166	9.5504	1	0.156	0.1883	0.513	2	-0.165	-0.13286	0.487	372
rs133012502	26	45783215	ADAM12	hcr	a	-0.440572	9.5474	2	0.373	0.40502	0.154	1	-0.068	-0.03556	0.846	373
rs108943690	4	25301015	AGR2	hcr	a	-0.336296	9.5413	2	0.222	0.24989	0.34	1	-0.114	-0.08641	0.66	374
rs132804410	19	35947991	WFIKKN2-ENSBTAG00000042852	hcr	a	-0.329903	9.5384	2	0.13	0.1628	0.607	1	-0.2	-0.1671	0.393	375
rs109956164	27	26921914	PPP2CB	hcr	a	0.345353	9.5255	1	0.113	0.15001	0.672	2	-0.232	-0.19534	0.328	376
rs29022944	19	25846418	ENSBTAG00000050735-NLRP1	hcr	a	0.38293	9.5131	1	0.0851	0.11316	0.778	2	-0.298	-0.26977	0.222	377
rs42396627	15	28682353	IL10RA-ENSBTAG00000042236	hcr	a	0.357039	9.5115	1	0.0987	0.12636	0.724	2	-0.258	-0.23068	0.276	378
rs110642851	20	67885808	ADAMTS16	hcr	a	-0.334463	9.5109	2	0.211	0.22805	0.37	1	-0.124	-0.10641	0.63	379
rs41643531	19	33855480	ULK2	hcr	a	0.33676	9.5019	1	0.226	0.25503	0.328	2	-0.11	-0.08173	0.672	380
rs109377247	6	85896097	LOC100848253	hcr	a	0.316973	9.4848	1	0.158	0.18646	0.5	2	-0.159	-0.13052	0.5	381
rs3423574679	29	35429356	NTM	hcr	a	-0.344223	9.4796	2	0.127	0.1443	0.631	1	-0.217	-0.19993	0.369	382
rs110518699	17	12483820	ZNF827	hcr	a	0.410485	9.4665	1	0.0755	0.10542	0.816	2	-0.335	-0.30507	0.184	383
rs108993260	10	66534185	BMP4-CDKN3	hcr	a	-0.323556	9.4616	2	0.132	0.16045	0.593	1	-0.192	-0.16311	0.407	384
rs135158998	10	65008506	C10H15orf48	hcr	a	0.326422	9.4525	1	0.144	0.19069	0.558	2	-0.182	-0.13573	0.442	385
rs3423463764	19	31510882	ENSBTAG00000052541-HS3ST3A1	hcr	a	0.432444	9.4511	1	0.0725	0.10211	0.832	2	-0.36	-0.33033	0.168	386
rs136591420	19	31670202	ENSBTAG00000052541-HS3ST3A1	hcr	a	-0.327235	9.4411	2	0.122	0.14973	0.628	1	-0.205	-0.1775	0.372	387
rs41601701	3	100718088	TESK2-TOE1	hcr	a	0.414846	9.4377	1	0.0727	0.1001	0.825	2	-0.342	-0.31475	0.175	388
rs136365750	29	47969962	SHANK2	hcr	a	-0.373943	9.4357	2	0.095	0.13788	0.746	1	-0.279	-0.23606	0.254	389
rs137259386	29	47975800	SHANK2	hcr	a	-0.345315	9.4342	2	0.108	0.15755	0.686	1	-0.237	-0.18777	0.314	390
rs135395848	1	112560358	MME	hcr	a	-0.35796	9.4313	2	0.0982	0.13008	0.726	1	-0.26	-0.22788	0.274	391
rs110506936	6	58148793	ENSBTAG00000055220	hcr	a	0.434052	9.4241	1	0.0691	0.09706	0.841	2	-0.365	-0.33699	0.159	392
rs109760292	1	25550567	U2(d)	hcr	a	-0.414218	9.4164	2	0.34	0.37411	0.178	1	-0.0739	-0.04011	0.822	393
rs41922614	19	45244657	LYZL6	hcr	a	0.596351	9.4134	1	0.0472	0.08248	0.921	2	-0.549	-0.51387	0.0791	394
rs41574509	15	44321644	LMO1	hcr	a	-0.372648	9.408	2	0.0877	0.11615	0.765	1	-0.285	-0.2565	0.235	395
rs41920363	19	43722064	MPP3-CD300LG	hcr	a	-0.378928	9.4078	2	0.0846	0.11266	0.777	1	-0.294	-0.26627	0.223	396
rs43566905	8	76525216	FRMD3	hcr	a	0.353941	9.4077	1	0.257	0.28512	0.274	2	-0.0971	-0.06882	0.726	397
rs109958034	10	52771911	CGNL1	hcr	a	0.371132	9.4025	1	0.0889	0.11819	0.761	2	-0.282	-0.25294	0.239	398
rs41626136	4	28676208	TMEM196-MACC1	hcr	a	-0.334362	9.402	2	0.113	0.13822	0.663	1	-0.222	-0.19614	0.337	399
rs41582674	15	42356134	ENSBTAG00000051340-ADM	hcr	a	-0.323508	9.4003	2	0.13	0.15668	0.598	1	-0.193	-0.16682	0.402	400
rs41748207	15	22688632	ENSBTAG00000053780	hcr	a	0.434102	9.3987	1	0.0697	0.10312	0.839	2	-0.364	-0.33098	0.161	401
rs132943976	9	69505899	AKAP7-ARG1	hcr	a	-0.316406	9.3975	2	0.15	0.1801	0.525	1	-0.166	-0.13631	0.475	402
rs42496487	8	76173589	RASEF	hcr	a	-0.332572	9.397	2	0.219	0.24874	0.341	1	-0.113	-0.08383	0.659	403
rs109442217	10	69231947	OTX2-ENSBTAG00000051793	hcr	a	0.33657	9.3864	1	0.111	0.14049	0.67	2	-0.225	-0.19608	0.33	404
rs41611714	10	66406378	U6-BMP4	hcr	a	-0.317045	9.3823	2	0.147	0.17399	0.535	1	-0.17	-0.14305	0.465	405
rs42811990	15	44606959	OR10A3I	hcr	a	-0.324269	9.3747	2	0.126	0.15398	0.612	1	-0.198	-0.17029	0.388	406
rs134693560	29	43325687	ZNHIT2-FAU	hcr	a	-0.515065	9.3717	2	0.0538	0.08255	0.896	1	-0.461	-0.43251	0.104	407
rs41602673	4	37954086	PCLO-CACNA2D1	hcr	a	-0.352882	9.3646	2	0.0981	0.12788	0.722	1	-0.255	-0.225	0.278	408
rs3423304213	10	58336188	MAPK6	hcr	a	0.378354	9.3238	1	0.0877	0.11969	0.768	2	-0.291	-0.25866	0.232	409
rs109036196	6	89218927	MTHFD2L	hcr	a	0.37346	9.3189	1	0.287	0.31701	0.23	2	-0.0861	-0.05645	0.77	410
rs109375396	24	30381754	KCTD1	hcr	a	0.319484	9.3124	1	0.188	0.21587	0.412	2	-0.132	-0.10361	0.588	411
rs136914566	14	31446535	ARFGEF1	hcr	a	0.338987	9.301	1	0.226	0.25752	0.334	2	-0.113	-0.08146	0.666	412
rs135338842	17	13955510	HHIP-ENSBTAG00000054798	hcr	a	0.322964	9.2977	1	0.126	0.1568	0.61	2	-0.197	-0.16617	0.39	413
rs133331545	7	47822584	TRPC7(d)	hcr	a	-0.357047	9.2925	2	0.263	0.29492	0.264	1	-0.0943	-0.06213	0.736	414
rs109262785	22	41789028	FHIT-ENSBTAG00000054841	hcr	a	0.33042	9.2862	1	0.216	0.24597	0.346	2	-0.114	-0.08445	0.654	415
rs29015286	4	37451912	PCLO	hcr	a	0.316622	9.2701	1	0.137	0.16485	0.567	2	-0.18	-0.15177	0.433	416
rs110167432	4	110260850	ENSBTAG00000000719	hcr	a	0.319047	9.2634	1	0.185	0.21215	0.419	2	-0.134	-0.10689	0.581	417
rs43685327	21	49883941	bta-mir-2365(d)	hcr	a	-0.325189	9.2634	2	0.198	0.22566	0.39	1	-0.127	-0.09953	0.61	418
rs110678609	10	58529252	TMOD3	hcr	a	-0.335438	9.2599	2	0.112	0.13874	0.666	1	-0.224	-0.1967	0.334	419
rs109111859	19	36585153	ITGA3	hcr	a	0.337224	9.2548	1	0.106	0.13426	0.685	2	-0.231	-0.20296	0.315	420
rs41607284	19	35683912	SPAG9	hcr	a	-0.317785	9.254	2	0.129	0.15645	0.594	1	-0.189	-0.16133	0.406	421
rs109739092	19	33626697	SPECC1	hcr	a	-0.319193	9.2441	2	0.127	0.15553	0.601	1	-0.192	-0.16367	0.399	422
rs110763081	19	33511850	SPECC1	hcr	a	-0.413769	9.2437	2	0.0735	0.10481	0.822	1	-0.34	-0.30896	0.178	423
rs41591885	10	70109597	SLC35F4-7SK	hcr	a	-0.32241	9.2266	2	0.124	0.15551	0.615	1	-0.198	-0.1669	0.385	424
rs136330440	26	40517972	PLPP4	hcr	a	0.371187	9.2211	1	0.0922	0.12406	0.752	2	-0.279	-0.24712	0.248	425
rs109523352	19	39796918	FBXL20	hcr	a	0.340268	9.2207	1	0.11	0.1536	0.675	2	-0.23	-0.18667	0.325	426
rs132923943	15	15148504	U6-ENSBTAG00000051840	hcr	a	-0.418291	9.2072	2	0.0737	0.09731	0.824	1	-0.345	-0.32098	0.176	427
rs29018037	29	37141033	MS4A10	hcr	a	-0.321659	9.1972	2	0.123	0.14954	0.617	1	-0.198	-0.17212	0.383	428
rs137445971	10	69443496	OTX2-ENSBTAG00000051793	hcr	a	0.399698	9.1931	1	0.0784	0.10744	0.804	2	-0.321	-0.29226	0.196	429
rs137762482	7	49937685	CTNNA1	hcr	a	-0.313936	9.1919	2	0.166	0.1983	0.472	1	-0.148	-0.11563	0.528	430
rs109266933	29	50182655	TOLLIP	hcr	a	0.314805	9.1851	1	0.177	0.20469	0.439	2	-0.138	-0.11011	0.561	431
rs109104821	21	49856530	bta-mir-2365(d)	hcr	a	0.355916	9.1831	1	0.263	0.29241	0.26	2	-0.0925	-0.0635	0.74	432
rs41906984	19	28572211	NTN1	hcr	a	-0.337694	9.1828	2	0.105	0.13325	0.69	1	-0.233	-0.20444	0.31	433
rs110304273	10	58999970	GLDN	hcr	a	0.312018	9.1664	1	0.156	0.18412	0.5	2	-0.156	-0.1279	0.5	434
rs29026690	23	27603651	ABHD16A	hcr	a	-0.502927	9.1559	2	0.449	0.47836	0.107	1	-0.054	-0.02456	0.893	435
rs109997307	2	34309462	GCG-DPP4	hcr	a	-0.320031	9.1529	2	0.197	0.22539	0.385	1	-0.123	-0.09464	0.615	436
rs41610971	9	45715723	ENSBTAG00000053858-U6	hcr	a	-0.479109	9.1459	2	0.422	0.44954	0.119	1	-0.0572	-0.02957	0.881	437
rs110117581	9	56736092	ENSBTAG00000003743-EPHA7	hcr	a	0.392815	9.1416	1	0.0775	0.10699	0.803	2	-0.315	-0.28583	0.197	438
rs43639551	10	69722290	SNORA72-NAA30	hcr	a	0.314521	9.123	1	0.136	0.16472	0.568	2	-0.179	-0.1498	0.432	439
rs110216616	10	64098165	5S-rRNA(d)	hcr	a	-0.367177	9.1213	2	0.0868	0.11321	0.764	1	-0.28	-0.25397	0.236	440
rs41589596	10	55693450	UNC13C	hcr	a	0.391711	9.1184	1	0.0775	0.10765	0.802	2	-0.314	-0.28407	0.198	441
rs3423093999	10	67160727	SAMD4A	hcr	a	-0.37825	9.1152	2	0.0822	0.11255	0.783	1	-0.296	-0.2657	0.217	442
rs110484230	1	26431102	ROBO1	hcr	a	-0.397585	9.1111	2	0.321	0.35588	0.193	1	-0.0765	-0.04171	0.807	443
rs136788311	7	47759989	TRPC7	hcr	a	0.336343	9.1081	1	0.23	0.26286	0.317	2	-0.107	-0.07349	0.683	444
rs41662471	9	72186135	SLC2A12	hcr	a	-0.377207	9.0906	2	0.0813	0.10933	0.784	1	-0.296	-0.26788	0.216	445
rs110119678	7	52731403	RELL2	hcr	a	0.320986	9.0895	1	0.201	0.22937	0.372	2	-0.12	-0.09162	0.628	446
rs135316717	10	68394131	ENSBTAG00000049100-PELI2	hcr	a	0.321823	9.0836	1	0.125	0.1543	0.61	2	-0.196	-0.16752	0.39	447
rs133699229	15	38952840	SPON1-FAR1	hcr	a	-0.342406	9.0809	2	0.105	0.12867	0.693	1	-0.237	-0.21374	0.307	448
rs29019638	6	101444935	MAPK10-LOC616295	hcr	a	-0.344492	9.08	2	0.0982	0.12701	0.715	1	-0.246	-0.21748	0.285	449
rs42408125	1	28489054	ENSBTAG00000051036(d)	hcr	a	-0.428255	9.0752	2	0.361	0.39007	0.156	1	-0.0669	-0.03819	0.844	450
rs109519629	10	87361824	IFT43	hcr	a	0.32697	9.0626	1	0.113	0.14393	0.654	2	-0.214	-0.18304	0.346	451
rs379236718	8	81085852	FBP1	hcr	a	0.462688	9.0588	1	0.0598	0.08893	0.871	2	-0.403	-0.37376	0.129	452
rs43706960	29	46324319	ENSBTAG00000016774	hcr	a	-0.344169	9.0576	2	0.237	0.28158	0.313	1	-0.108	-0.06259	0.687	453
rs109537915	9	66269745	PTPRK	hcr	a	-0.319231	9.0543	2	0.122	0.15032	0.617	1	-0.197	-0.16891	0.383	454
rs41601946	7	49231095	HNRNPA0-MYOT	hcr	a	-0.327723	9.052	2	0.217	0.2466	0.336	1	-0.11	-0.08112	0.664	455
rs134205369	10	67019894	CGRRF1	hcr	a	0.312255	9.0494	1	0.15	0.17571	0.521	2	-0.163	-0.13655	0.479	456
rs42599672	7	47313751	SLC25A48-IL9	hcr	a	0.311811	9.0433	1	0.17	0.20244	0.455	2	-0.142	-0.10937	0.545	457
rs136518432	10	63763062	5S-rRNA(u)	hcr	a	-0.31619	9.0214	2	0.152	0.18925	0.519	1	-0.164	-0.12694	0.481	458
rs43218170	1	25126982	LOC781698	hcr	a	0.317481	9.016	1	0.193	0.22202	0.391	2	-0.124	-0.09546	0.609	459
rs110706751	10	58385341	MAPK6-LEO1	hcr	a	0.446741	9.0147	1	0.0628	0.09087	0.86	2	-0.384	-0.35587	0.14	460
rs132764531	10	29575944	FMN1	hcr	a	0.425024	9.014	1	0.0673	0.09452	0.842	2	-0.358	-0.3305	0.158	461
rs109565014	10	62005356	FBN1-DUT	hcr	a	-0.311587	9.0115	2	0.176	0.20371	0.435	1	-0.136	-0.10787	0.565	462
rs41762664	15	42375242	ENSBTAG00000051340-ADM	hcr	a	0.319259	9.0108	1	0.13	0.16568	0.594	2	-0.19	-0.15357	0.406	463
rs43478900	6	91666641	SHROOM3-SOWAHB	hcr	a	0.427988	9.0072	1	0.067	0.09533	0.843	2	-0.361	-0.33266	0.157	464
rs110348062	10	63377973	LOC782100	hcr	a	0.320352	8.9996	1	0.12	0.1517	0.626	2	-0.2	-0.16865	0.374	465
rs110299071	6	100312773	ARHGAP24	hcr	a	0.325751	8.9981	1	0.112	0.13895	0.655	2	-0.213	-0.1868	0.345	466
rs110570580	13	67809603	DHX35(d)	hcr	a	0.309279	8.9906	1	0.161	0.18919	0.48	2	-0.149	-0.12009	0.52	467
rs132892049	21	51612911	LRFN5	hcr	a	-0.362726	8.977	2	0.271	0.30986	0.253	1	-0.0917	-0.05286	0.747	468
rs110254676	29	46969268	FGF19-FGF4	hcr	a	-0.31439	8.9755	2	0.13	0.15941	0.587	1	-0.185	-0.15498	0.413	469
rs110607900	14	29362443	CYP7B1	hcr	a	0.31416	8.9702	1	0.142	0.16267	0.548	2	-0.172	-0.15149	0.452	470
rs110503305	29	49812895	ENSBTAG00000053793-ENSBTAG00000019579	hcr	a	0.311573	8.9668	1	0.155	0.18636	0.502	2	-0.157	-0.12521	0.498	471
rs42503038	21	40505169	PRKD1(d)	hcr	a	0.337783	8.9651	1	0.101	0.13027	0.7	2	-0.236	-0.20751	0.3	472
rs110838407	20	22400647	MAP3K1	hcr	a	0.426479	8.9484	1	0.0664	0.09585	0.844	2	-0.36	-0.33063	0.156	473
rs134151363	9	67532648	LAMA2	hcr	a	0.350982	8.9459	1	0.0937	0.11954	0.733	2	-0.257	-0.23145	0.267	474
rs42230125	10	68307915	ENSBTAG00000049100	hcr	a	-0.312178	8.9378	2	0.132	0.16357	0.577	1	-0.18	-0.14861	0.423	475
rs81177940	13	67172588	BPI	hcr	a	-0.313825	8.9363	2	0.128	0.15351	0.593	1	-0.186	-0.16032	0.407	476
rs133649698	10	58240197	ENSBTAG00000005429-U6	hcr	a	0.421835	8.9322	1	0.0677	0.09575	0.84	2	-0.354	-0.32608	0.16	477
rs110869250	19	35081770	MPRIP-TNFRSF13B	hcr	a	0.307273	8.9288	1	0.159	0.18597	0.482	2	-0.148	-0.1213	0.518	478
rs42278828	15	44377304	RIC3	hcr	a	-0.362915	8.9199	2	0.278	0.30606	0.234	1	-0.0848	-0.05685	0.766	479
rs133253538	1	71741471	DLG1	hcr	a	0.336531	8.9181	1	0.103	0.13644	0.695	2	-0.234	-0.2001	0.305	480
rs137727001	8	40320705	ENSBTAG00000052736	hcr	a	-0.309918	8.9172	2	0.152	0.17953	0.508	1	-0.158	-0.13038	0.492	481
rs41888400	18	54990918	ENSBTAG00000052953-ZNF114	hcr	a	-0.328651	8.9158	2	0.123	0.14371	0.627	1	-0.206	-0.18494	0.373	482
rs132752391	13	67954504	DHX35(d)	hcr	a	0.322688	8.9149	1	0.2	0.23339	0.381	2	-0.123	-0.0893	0.619	483
rs41622861	7	43580347	POLR2E	hcr	a	0.312061	8.9141	1	0.129	0.15855	0.586	2	-0.183	-0.15351	0.414	484
rs109357328	19	33556351	SPECC1	hcr	a	-0.316839	8.9129	2	0.129	0.15887	0.593	1	-0.188	-0.15797	0.407	485
rs41734980	14	29093667	ENSBTAG00000055090(u)	hcr	a	-0.30998	8.9103	2	0.153	0.18209	0.505	1	-0.157	-0.12789	0.495	486
rs41700634	13	66817509	VSTM2L	hcr	a	-0.340847	8.8995	2	0.109	0.14501	0.68	1	-0.232	-0.19584	0.32	487
rs109374136	7	51159887	NRG2	hcr	a	-0.308249	8.8955	2	0.168	0.19817	0.454	1	-0.14	-0.11008	0.546	488
rs42904482	10	69277691	OTX2-ENSBTAG00000051793	hcr	a	-0.324442	8.8902	2	0.121	0.14703	0.627	1	-0.203	-0.17741	0.373	489
rs41752385	15	20365790	RDX-FDX1	hcr	a	0.310268	8.8899	1	0.145	0.1784	0.533	2	-0.165	-0.13187	0.467	490
rs110330758	10	59372784	TNFAIP8L3-AP4E1	hcr	a	0.444213	8.8884	1	0.0627	0.09094	0.859	2	-0.381	-0.35327	0.141	491
rs135662457	13	40955787	PAX1-ENSBTAG00000048400	hcr	a	-0.388455	8.884	2	0.313	0.34203	0.193	1	-0.0751	-0.04643	0.807	492
rs132780365	10	68602507	PELI2	hcr	a	0.314397	8.8835	1	0.125	0.15927	0.601	2	-0.189	-0.15513	0.399	493
rs41947330	20	35702462	OSMR-LIFR	hcr	a	0.423773	8.8793	1	0.0661	0.09444	0.844	2	-0.358	-0.32933	0.156	494
rs109512982	10	58627199	LYSMD2	hcr	a	0.397126	8.8693	1	0.0761	0.11406	0.808	2	-0.321	-0.28307	0.192	495
rs109016118	6	102811666	PPP2R2C	hcr	a	0.428702	8.8592	1	0.0646	0.08952	0.849	2	-0.364	-0.33918	0.151	496
rs110722609	29	37519156	VPS37C-ENSBTAG00000048600	hcr	a	0.332167	8.8576	1	0.101	0.12927	0.695	2	-0.231	-0.2029	0.305	497
rs109462003	10	66481942	U6-BMP4	hcr	a	0.326595	8.8571	1	0.108	0.13638	0.67	2	-0.219	-0.19021	0.33	498
rs43723439	19	40279880	LRRC3C-ENSBTAG00000050854	hcr	a	0.311397	8.8569	1	0.128	0.16144	0.588	2	-0.183	-0.14996	0.412	499
rs110215185	23	28830632	TRIM40	hcr	a	-0.307695	8.8564	2	0.158	0.18698	0.487	1	-0.15	-0.12072	0.513	500
rs43017941	10	69478429	OTX2-ENSBTAG00000051793	hcr	a	-0.322787	8.8559	2	0.112	0.13964	0.654	1	-0.211	-0.18315	0.346	501
rs109718824	21	45506899	PRORP	hcr	a	-0.312873	8.8559	2	0.145	0.18141	0.536	1	-0.168	-0.13147	0.464	502
rs481680488	4	47084283	CDHR3	hcr	a	0.502054	8.8557	1	0.0532	0.08309	0.894	2	-0.449	-0.41897	0.106	503
rs109450892	29	46942859	FGF19	hcr	a	-0.390438	8.8549	2	0.0746	0.10312	0.809	1	-0.316	-0.28732	0.191	504
rs137457305	23	26926436	C23H6orf10	hcr	a	0.350416	8.8457	1	0.258	0.29322	0.263	2	-0.0923	-0.0572	0.737	505
rs136589937	10	60498875	ATP8B4-U6	hcr	a	-0.368108	8.833	2	0.0827	0.11216	0.775	1	-0.285	-0.25594	0.225	506
rs41735007	14	29039917	ENSBTAG00000055090(u)	hcr	a	-0.305435	8.824	2	0.152	0.17991	0.503	1	-0.154	-0.12552	0.497	507
rs3423093996	15	19085745	DDX10-C15H11orf87	hcr	a	-0.306661	8.8227	2	0.147	0.17591	0.521	1	-0.16	-0.13075	0.479	508
rs135666366	9	41813508	AFG1L	hcr	a	-0.4892	8.8192	2	0.433	0.46488	0.114	1	-0.0559	-0.02432	0.886	509
rs110812817	19	36052759	ABCC3	hcr	a	-0.496544	8.8179	2	0.0552	0.08641	0.889	1	-0.441	-0.41013	0.111	510
rs110027894	10	58887051	DMXL2	hcr	a	-0.428334	8.8141	2	0.0655	0.09378	0.847	1	-0.363	-0.33455	0.153	511
rs110445664	6	101541974	PTPN13	hcr	a	0.390909	8.813	1	0.0741	0.10276	0.81	2	-0.317	-0.28815	0.19	512
rs43268844	1	132221166	NCK1	hcr	a	0.311628	8.7988	1	0.126	0.15424	0.595	2	-0.185	-0.15739	0.405	513
rs43638613	10	69778006	NAA30	hcr	a	-0.308421	8.7958	2	0.136	0.16571	0.561	1	-0.173	-0.14271	0.439	514
rs135909264	14	34007251	NCOA2	hcr	a	0.308573	8.7877	1	0.146	0.17701	0.527	2	-0.163	-0.13156	0.473	515
rs134966461	9	67920986	ARHGAP18	hcr	a	-0.322666	8.7786	2	0.114	0.1451	0.646	1	-0.208	-0.17757	0.354	516
rs42977627	15	5247438	DYNC2H1	hcr	a	0.366588	8.7715	1	0.0856	0.11098	0.766	2	-0.281	-0.25561	0.234	517
rs43641940	10	69506119	OTX2-ENSBTAG00000051793	hcr	a	-0.390361	8.7603	2	0.0778	0.10555	0.801	1	-0.313	-0.28481	0.199	518
rs41636112	19	47981728	STRADA	hcr	a	0.35372	8.7598	1	0.0866	0.11563	0.755	2	-0.267	-0.23809	0.245	519
rs110474375	19	34233799	SLC5A10-FAM83G	hcr	a	-0.310782	8.7583	2	0.186	0.21375	0.402	1	-0.125	-0.09703	0.598	520
rs110107131	29	40314843	FADS1	hcr	a	0.323825	8.757	1	0.107	0.13473	0.671	2	-0.217	-0.18909	0.329	521
rs137011807	10	54011581	TEX9	hcr	a	-0.314928	8.7535	2	0.119	0.14894	0.622	1	-0.196	-0.16599	0.378	522
rs109836032	19	33581205	SPECC1	hcr	a	0.319985	8.7465	1	0.211	0.2393	0.341	2	-0.109	-0.08069	0.659	523
rs110452681	13	67295364	ENSBTAG00000047302	hcr	a	0.314795	8.7356	1	0.195	0.21956	0.379	2	-0.119	-0.09524	0.621	524
BTA-102407-no-rs	3	80436677	LOC112445908	hcr	a	-0.405085	8.7337	2	0.0694	0.10047	0.829	1	-0.336	-0.30462	0.171	525
rs110931444	4	29840788	SP8-ENSBTAG00000045673	hcr	a	0.308102	8.7256	1	0.138	0.15875	0.554	2	-0.171	-0.14935	0.446	526
rs41638391	20	22444382	MAP3K1-ENSBTAG00000049279	hcr	a	0.377804	8.7154	1	0.0781	0.10461	0.793	2	-0.3	-0.2732	0.207	527
rs137504512	17	13801294	HHIP-ENSBTAG00000054798	hcr	a	0.31089	8.7109	1	0.162	0.18844	0.478	2	-0.149	-0.12245	0.522	528
rs110592271	19	31816939	HS3ST3A1	hcr	a	0.308113	8.7089	1	0.182	0.20815	0.41	2	-0.126	-0.09997	0.59	529
rs109883394	1	89178174	ENSBTAG00000048417-U6	hcr	a	0.649844	8.7029	1	0.0394	0.06831	0.939	2	-0.61	-0.58153	0.0606	530
rs109791461	11	75957652	ENSBTAG00000052063	hcr	a	0.307099	8.7018	1	0.176	0.20425	0.426	2	-0.131	-0.10285	0.574	531
rs136116609	17	68724940	THOC5	hcr	a	-0.322868	8.6962	2	0.11	0.14533	0.66	1	-0.213	-0.17754	0.34	532
rs109645963	9	24170852	RSPO3	hcr	a	0.311783	8.6931	1	0.18	0.20496	0.422	2	-0.131	-0.10683	0.578	533
rs109842214	10	70311136	5S-rRNA-ARMH4	hcr	a	0.363185	8.6911	1	0.0834	0.11456	0.77	2	-0.28	-0.24862	0.23	534
rs135792693	10	22618483	LOC100336282	hcr	a	-0.326894	8.6746	2	0.219	0.25481	0.33	1	-0.108	-0.07209	0.67	535
rs110423449	9	67700327	ENSBTAG00000054952-5S-rRNA	hcr	a	-0.30343	8.6744	2	0.147	0.17612	0.514	1	-0.156	-0.12731	0.486	536
rs109577528	19	36818960	KAT7	hcr	a	-0.326268	8.6729	2	0.214	0.25143	0.344	1	-0.112	-0.07484	0.656	537
rs133799556	11	75929380	KLHL29-ENSBTAG00000052063	hcr	a	0.309801	8.6666	1	0.178	0.2149	0.427	2	-0.132	-0.0949	0.573	538
rs109830365	9	71565043	EYA4	hcr	a	0.31487	8.662	1	0.113	0.14095	0.641	2	-0.202	-0.17392	0.359	539
BTB-00666866	11	76208208	ENSBTAG00000052063(d)	hcr	a	0.464569	8.6565	1	0.0589	0.09377	0.873	2	-0.406	-0.3708	0.127	540
rs110925448	13	60075104	PSMF1-RSPO4	hcr	a	-0.351511	8.6515	2	0.262	0.28051	0.256	1	-0.09	-0.071	0.744	541
rs3423285552	9	65955703	THEMIS-PTPRK	hcr	a	-0.304468	8.6484	2	0.14	0.17055	0.54	1	-0.164	-0.13391	0.46	542
rs43376319	4	28513705	TMEM196	hcr	a	0.316403	8.6468	1	0.123	0.13597	0.611	2	-0.193	-0.18043	0.389	543
rs41651809	29	37432716	CD5	hcr	a	-0.328192	8.6441	2	0.0999	0.12795	0.695	1	-0.228	-0.20025	0.305	544
rs109327085	29	46917621	LTO1-FGF19	hcr	a	-0.305749	8.6411	2	0.132	0.15989	0.568	1	-0.174	-0.14586	0.432	545
rs43420740	4	113527605	KCNH2	hcr	a	-0.323935	8.6409	2	0.106	0.13631	0.673	1	-0.218	-0.18763	0.327	546
rs137558699	19	37056324	NXPH3-NGFR	hcr	a	-0.311896	8.6378	2	0.119	0.14934	0.617	1	-0.192	-0.16256	0.383	547
rs41659765	9	54628164	5S-rRNA-7SK	hcr	a	-0.437145	8.634	2	0.377	0.40462	0.139	1	-0.0605	-0.03253	0.861	548
rs41666412	10	68336932	ENSBTAG00000049100	hcr	a	0.388322	8.6256	1	0.0735	0.10317	0.811	2	-0.315	-0.28515	0.189	549
rs43378306	4	29936781	SP8-ENSBTAG00000045673	hcr	a	-0.308223	8.6245	2	0.139	0.16042	0.549	1	-0.169	-0.1478	0.451	550
rs109314119	5	35860531	NELL2	hcr	a	0.364999	8.6236	1	0.0801	0.10818	0.781	2	-0.285	-0.25682	0.219	551
rs137240553	3	78805735	SGIP1	hcr	a	0.474076	8.6218	1	0.0555	0.07643	0.883	2	-0.419	-0.39764	0.117	552
rs133310173	29	46987471	FGF19-FGF4	hcr	a	-0.368548	8.6194	2	0.0829	0.1277	0.775	1	-0.286	-0.24085	0.225	553
rs42193550	29	47531756	CTTN	hcr	a	-0.312145	8.6179	2	0.119	0.15297	0.617	1	-0.193	-0.15917	0.383	554
rs3423350154	13	53142886	PDYN	hcr	a	-0.307403	8.6173	2	0.146	0.18162	0.524	1	-0.161	-0.12578	0.476	555
rs42232313	9	24252390	RSPO3-ENSBTAG00000012254	hcr	a	0.310646	8.6161	1	0.185	0.21483	0.404	2	-0.126	-0.09582	0.596	556
rs41596909	11	42239087	ENSBTAG00000053096(u)	hcr	a	-0.302809	8.6144	2	0.158	0.18623	0.478	1	-0.145	-0.11658	0.522	557
rs42187865	29	40320755	FADS1	hcr	a	-0.334676	8.6119	2	0.0958	0.12482	0.714	1	-0.239	-0.20986	0.286	558
rs41917317	19	44332440	FZD2-MEIOC	hcr	a	-0.503531	8.6019	2	0.0504	0.07893	0.9	1	-0.453	-0.4246	0.1	559
rs3423261172	8	42791787	SMARCA2(d)	hcr	a	0.331069	8.5988	1	0.102	0.12913	0.692	2	-0.229	-0.20194	0.308	560
rs132679423	10	54488422	NEDD4	hcr	a	0.353364	8.5943	1	0.086	0.11595	0.757	2	-0.267	-0.23742	0.243	561
rs41581300	14	12031916	ENSBTAG00000051356(u)	hcr	a	0.381143	8.59	1	0.0745	0.10353	0.805	2	-0.307	-0.27761	0.195	562
rs110418530	9	36422579	ENSBTAG00000049305-HDAC2	hcr	a	-0.31198	8.5795	2	0.127	0.16351	0.593	1	-0.185	-0.14847	0.407	563
rs29009594	10	70049800	SLC35F4-7SK	hcr	a	0.302332	8.5723	1	0.141	0.17012	0.533	2	-0.161	-0.13221	0.467	564
rs41586585	29	47358216	ANO1	hcr	a	-0.320518	8.5592	2	0.21	0.24358	0.343	1	-0.11	-0.07694	0.657	565
rs132918266	3	79349971	PDE4B-MGC137454	hcr	a	0.429945	8.5577	1	0.0641	0.08225	0.851	2	-0.366	-0.34769	0.149	566
rs109272095	8	24402182	ENSBTAG00000049390-SLC24A2	hcr	a	-0.475046	8.5566	2	0.0543	0.08207	0.886	1	-0.421	-0.39298	0.114	567
rs109412945	3	10857578	OR10AA1-OR10AA1C	hcr	a	-0.308961	8.5493	2	0.14	0.1723	0.547	1	-0.169	-0.13666	0.453	568
rs132803174	11	75910134	KLHL29-ENSBTAG00000052063	hcr	a	0.309771	8.5492	1	0.176	0.21567	0.43	2	-0.133	-0.0941	0.57	569
rs135568506	17	12152677	REELD1-LSM6	hcr	a	0.318216	8.5436	1	0.135	0.17305	0.576	2	-0.183	-0.14517	0.424	570
rs110915948	13	67108319	KIAA1755	hcr	a	0.311551	8.5433	1	0.143	0.17904	0.54	2	-0.168	-0.13251	0.46	571
rs109349472	10	67059620	CGRRF1-SAMD4A	hcr	a	0.305386	8.5404	1	0.128	0.15542	0.582	2	-0.178	-0.14997	0.418	572
rs42223324	10	68706049	PELI2	hcr	a	-0.302449	8.5376	2	0.137	0.16494	0.548	1	-0.166	-0.13751	0.452	573
rs43335166	10	59343821	TNFAIP8L3	hcr	a	-0.301409	8.5269	2	0.153	0.18021	0.491	1	-0.148	-0.1212	0.509	574
rs41614846	10	60062549	SLC27A2	hcr	a	0.392801	8.5237	1	0.071	0.09903	0.819	2	-0.322	-0.29377	0.181	575
rs41587051	8	84050346	CENPP-OMD	hcr	a	0.476961	8.5179	1	0.0538	0.07759	0.887	2	-0.423	-0.39937	0.113	576
rs135716871	21	45495871	PRORP	hcr	a	-0.334024	8.517	2	0.103	0.1392	0.692	1	-0.231	-0.19483	0.308	577
rs43514590	7	43755185	EFNA2-PWWP3A	hcr	a	0.305836	8.5152	1	0.127	0.16248	0.583	2	-0.178	-0.14336	0.417	578
rs136885412	5	52088063	TAFA2-ENSBTAG00000040344	hcr	a	-0.301035	8.5031	2	0.147	0.17478	0.512	1	-0.154	-0.12625	0.488	579
rs41635821	18	54201723	SAE1	hcr	a	0.305584	8.4998	1	0.126	0.15524	0.586	2	-0.179	-0.15034	0.414	580
rs3423252602	7	58855813	JAKMIP2	hcr	a	0.300273	8.494	1	0.155	0.18698	0.485	2	-0.146	-0.11329	0.515	581
rs136641039	14	29437141	CYP7B1	hcr	a	0.328035	8.4918	1	0.226	0.2459	0.311	2	-0.102	-0.08214	0.689	582
rs109439667	6	58077967	TLR6	hcr	a	-0.349963	8.4865	2	0.0846	0.11273	0.758	1	-0.265	-0.23724	0.242	583
rs110313808	24	47409424	ENSBTAG00000052001-SMAD2	hcr	a	0.55785	8.4858	1	0.0444	0.07841	0.92	2	-0.513	-0.47944	0.0795	584
rs41593206	7	51106002	NRG2	hcr	a	0.301213	8.4842	1	0.138	0.16826	0.541	2	-0.163	-0.13296	0.459	585
rs110502082	5	28338965	SLC4A8	hcr	a	-0.404371	8.4839	2	0.0681	0.09538	0.831	1	-0.336	-0.30899	0.169	586
rs41611752	9	55115730	7SK-ENSBTAG00000033083	hcr	a	-0.403853	8.4831	2	0.337	0.36462	0.166	1	-0.067	-0.03924	0.834	587
rs109450440	10	63222044	blank	hcr	a	0.31519	8.4793	1	0.111	0.14272	0.649	2	-0.205	-0.17247	0.351	588
rs108967388	19	36619889	ITGA3-DLX3	hcr	a	0.336704	8.4774	1	0.095	0.12296	0.718	2	-0.242	-0.21374	0.282	589
rs110762634	10	53771936	ZNF280D	hcr	a	-0.369047	8.4766	2	0.0781	0.10738	0.788	1	-0.291	-0.26167	0.212	590
rs134217009	19	33123683	ZNF624-ZNF287	hcr	a	0.341207	8.4659	1	0.0925	0.12634	0.729	2	-0.249	-0.21487	0.271	591
rs137217287	19	35884571	TOB1	hcr	a	-0.300427	8.4597	2	0.156	0.18234	0.481	1	-0.144	-0.11808	0.519	592
rs132734340	14	28920169	ENSBTAG00000055090(u)	hcr	a	0.302858	8.449	1	0.147	0.16961	0.513	2	-0.155	-0.13325	0.487	593
rs133358785	4	113831228	SMARCD3	hcr	a	-0.31617	8.4437	2	0.111	0.14168	0.648	1	-0.205	-0.17449	0.352	594
rs41594926	8	84402125	FGD3	hcr	a	0.470194	8.4423	1	0.0542	0.07836	0.885	2	-0.416	-0.39183	0.115	595
rs110157888	4	23920087	AGMO	hcr	a	0.313971	8.4384	1	0.109	0.13766	0.653	2	-0.205	-0.17631	0.347	596
rs109610152	7	56060284	KCTD16-ENSBTAG00000044350	hcr	a	-0.326921	8.4377	2	0.224	0.26568	0.314	1	-0.103	-0.06124	0.686	597
rs137220930	5	31351031	OR8S8-OR8S27	hcr	a	0.523001	8.4316	1	0.0476	0.07324	0.909	2	-0.475	-0.44976	0.0911	598
rs132675669	19	40287678	ENSBTAG00000050854	hcr	a	-0.312434	8.4272	2	0.127	0.17493	0.592	1	-0.185	-0.13751	0.408	599
rs109158732	14	70377378	PDP1-TMEM67	hcr	a	0.301455	8.4174	1	0.171	0.19882	0.434	2	-0.131	-0.10264	0.566	600
rs43293161	2	34152721	IFIH1	hcr	a	-0.316083	8.4161	2	0.21	0.23769	0.337	1	-0.106	-0.07839	0.663	601
rs110215270	10	65647253	LOC112448579	hcr	a	-0.300997	8.4123	2	0.133	0.16118	0.558	1	-0.168	-0.13982	0.442	602
rs135651499	6	100834011	ARHGAP24	hcr	a	-0.363758	8.4105	2	0.0837	0.11676	0.77	1	-0.28	-0.247	0.23	603
rs109706288	13	67177128	BPI	hcr	a	0.299463	8.3987	1	0.159	0.18734	0.467	2	-0.14	-0.11212	0.533	604
rs43605342	9	60665843	ANKRD6	hcr	a	-0.298702	8.3946	2	0.153	0.1806	0.487	1	-0.145	-0.1181	0.513	605
rs137282160	4	27952390	FERD3L-POLR1F	hcr	a	-0.326151	8.394	2	0.102	0.12525	0.688	1	-0.224	-0.2009	0.312	606
rs42286837	10	57823177	ARPP19	hcr	a	-0.318959	8.3937	2	0.108	0.13801	0.663	1	-0.211	-0.18094	0.337	607
rs43385603	4	39367514	ENSBTAG00000055213-U6	hcr	a	-0.309924	8.3895	2	0.117	0.14979	0.623	1	-0.193	-0.16013	0.377	608
rs42192301	29	47522215	CTTN	hcr	a	0.30676	8.3863	1	0.117	0.14525	0.618	2	-0.19	-0.16151	0.382	609
rs42012793	22	43628755	ARF4-PDE12	hcr	a	0.342587	8.3779	1	0.253	0.2918	0.26	2	-0.0892	-0.05079	0.74	610
rs110970585	4	29633678	SP8-ENSBTAG00000045673	hcr	a	0.314888	8.3644	1	0.105	0.13257	0.666	2	-0.21	-0.18232	0.334	611
rs3423092783	13	53248957	SIRPA-ENSBTAG00000048087	hcr	a	0.310279	8.3473	1	0.114	0.14236	0.634	2	-0.197	-0.16792	0.366	612
rs43634899	10	55312425	RSL24D1-ENSBTAG00000045196	hcr	a	0.314375	8.3429	1	0.107	0.13867	0.658	2	-0.207	-0.17571	0.342	613
rs42923947	4	35813626	SEMA3D-SEMA3A	hcr	a	-0.360788	8.3419	2	0.0782	0.10661	0.783	1	-0.283	-0.25418	0.217	614
rs109479606	20	23536176	SLC38A9	hcr	a	0.455954	8.3399	1	0.0568	0.09231	0.875	2	-0.399	-0.36365	0.125	615
rs109052053	8	41519128	LOC101905621	hcr	a	0.299278	8.3386	1	0.135	0.16192	0.547	2	-0.164	-0.13736	0.453	616
rs43376115	4	9846046	PEX1	hcr	a	-0.299586	8.3358	2	0.155	0.18927	0.483	1	-0.145	-0.11031	0.517	617
rs134404801	10	60807297	FGF7	hcr	a	-0.300686	8.3342	2	0.133	0.15905	0.557	1	-0.167	-0.14164	0.443	618
rs29027216	13	67776616	DHX35	hcr	a	-0.303594	8.3313	2	0.181	0.20796	0.403	1	-0.122	-0.09563	0.597	619
rs109434568	10	64984668	C10H15orf48	hcr	a	-0.316339	8.3293	2	0.105	0.13294	0.669	1	-0.212	-0.1834	0.331	620
rs110810482	10	65685953	DDHD1	hcr	a	-0.303839	8.3277	2	0.135	0.17806	0.556	1	-0.169	-0.12578	0.444	621
rs42737642	8	84297085	BICD2	hcr	a	0.465515	8.3227	1	0.0538	0.08092	0.884	2	-0.412	-0.3846	0.116	622
rs132718569	18	54930483	ENSBTAG00000038322-ENSBTAG00000038986	hcr	a	-0.353855	8.3181	2	0.268	0.29264	0.243	1	-0.086	-0.06121	0.757	623
rs41593775	8	84505543	NINJ1	hcr	a	0.328155	8.3179	1	0.0945	0.12145	0.712	2	-0.234	-0.2067	0.288	624
rs110807783	19	39471733	LASP1	hcr	a	-0.315884	8.3176	2	0.212	0.2403	0.328	1	-0.104	-0.07559	0.672	625
rs135570503	11	30848390	STON1	hcr	a	-0.325849	8.3173	2	0.101	0.13712	0.69	1	-0.225	-0.18873	0.31	626
rs136594706	9	45362194	HACE1-ENSBTAG00000053858	hcr	a	0.483966	8.3045	1	0.0507	0.07712	0.895	2	-0.433	-0.40685	0.105	627
rs134951869	19	36689977	ENSBTAG00000045805	hcr	a	0.33108	8.2949	1	0.0927	0.12312	0.72	2	-0.238	-0.20796	0.28	628
rs109230960	29	39628582	ENSBTAG00000040257-ENSBTAG00000051501	hcr	a	0.317523	8.2884	1	0.102	0.13194	0.678	2	-0.215	-0.18558	0.322	629
rs137781454	10	65036106	ENSBTAG00000050965-SPATA5L1	hcr	a	-0.315917	8.2883	2	0.104	0.13505	0.669	1	-0.211	-0.18087	0.331	630
rs42187697	29	41157401	ENSBTAG00000054053-SNORD27	hcr	a	-0.318085	8.2824	2	0.101	0.12958	0.682	1	-0.217	-0.1885	0.318	631
rs110746806	6	57984344	KLF3-ENSBTAG00000051019	hcr	a	-0.427023	8.2735	2	0.0602	0.08897	0.859	1	-0.367	-0.33805	0.141	632
rs29017116	21	30635777	ACSBG1-DNAJA4	hcr	a	0.299285	8.2729	1	0.168	0.1992	0.44	2	-0.132	-0.10008	0.56	633
rs110611791	10	69391347	OTX2-ENSBTAG00000051793	hcr	a	-0.308836	8.2702	2	0.113	0.14421	0.635	1	-0.196	-0.16463	0.365	634
rs110100712	29	39812893	LOC104976269	hcr	a	0.314779	8.2683	1	0.104	0.1323	0.671	2	-0.211	-0.18247	0.329	635
rs43387446	4	49534867	NRCAM	hcr	a	-0.421021	8.2594	2	0.0627	0.09301	0.851	1	-0.358	-0.32801	0.149	636
rs43035497	4	111488824	CNTNAP2	hcr	a	-0.300756	8.2565	2	0.145	0.18559	0.519	1	-0.156	-0.11516	0.481	637
rs137044248	10	25405051	ENSBTAG00000053908	hcr	a	0.3305	8.2558	1	0.237	0.2674	0.284	2	-0.094	-0.06309	0.716	638
rs110803531	10	60742043	FAM227B	hcr	a	-0.375833	8.2516	2	0.0727	0.10191	0.807	1	-0.303	-0.27392	0.193	639
rs109109743	3	9966541	LOC790098	hcr	a	0.316493	8.2475	1	0.114	0.16268	0.64	2	-0.203	-0.15381	0.36	640
rs41903732	10	68485546	ENSBTAG00000049100-PELI2	hcr	a	-0.340072	8.2458	2	0.0871	0.11523	0.744	1	-0.253	-0.22484	0.256	641
rs134301737	4	23891166	AGMO	hcr	a	-0.309444	8.2448	2	0.109	0.13487	0.649	1	-0.201	-0.17458	0.351	642
rs3423093217	7	58592504	STK32A-DPYSL3	hcr	a	-0.306135	8.2435	2	0.193	0.22538	0.369	1	-0.113	-0.08075	0.631	643
rs110945954	5	30453865	SPATS2	hcr	a	0.305217	8.2395	1	0.114	0.14305	0.627	2	-0.191	-0.16216	0.373	644
rs137775039	29	47731596	SHANK2	hcr	a	-0.313825	8.2351	2	0.21	0.23832	0.331	1	-0.104	-0.0755	0.669	645
rs135320415	9	46597607	U6-ENSBTAG00000043068	hcr	a	0.300448	8.2344	1	0.167	0.19993	0.444	2	-0.133	-0.10052	0.556	646
rs42678102	21	40719729	PRKD1-G2E3	hcr	a	0.325555	8.2255	1	0.0978	0.12753	0.7	2	-0.228	-0.19802	0.3	647
rs43552383	8	40996882	RFX3	hcr	a	-0.338344	8.2213	2	0.0867	0.11491	0.744	1	-0.252	-0.22344	0.256	648
rs110573477	10	59257779	LOC104973172	hcr	a	0.383824	8.2206	1	0.0699	0.09799	0.818	2	-0.314	-0.28584	0.182	649
rs109283871	5	25881031	SMUG1-ENSBTAG00000049837	hcr	a	-0.408705	8.2157	2	0.0658	0.0933	0.839	1	-0.343	-0.31541	0.161	650
rs109985942	13	40812532	ENSBTAG00000035643-ENSBTAG00000049444	hcr	a	0.366357	8.2099	1	0.291	0.319	0.207	2	-0.0758	-0.04735	0.793	651
rs43713634	15	30195661	ENSBTAG00000054648-bta-mir-378b	hcr	a	-0.341985	8.2077	2	0.0897	0.11561	0.738	1	-0.252	-0.22638	0.262	652
rs134205002	9	23214081	ME1	hcr	a	0.298571	8.2064	1	0.152	0.17713	0.491	2	-0.146	-0.12144	0.509	653
rs136194088	9	73153680	HBS1L-MYB	hcr	a	0.31127	8.1972	1	0.206	0.23477	0.338	2	-0.105	-0.0765	0.662	654
rs110736095	1	133687413	PPP2R3A-ENSBTAG00000051032	hcr	a	-0.298193	8.1944	2	0.155	0.18076	0.482	1	-0.144	-0.11744	0.518	655
rs109708762	14	68358639	GDF6-ENSBTAG00000049709	hcr	a	-0.2959	8.1937	2	0.135	0.16457	0.544	1	-0.161	-0.13133	0.456	656
rs42244832	20	12745754	MAST4	hcr	a	0.527142	8.1923	1	0.0455	0.07442	0.914	2	-0.482	-0.45272	0.0863	657
rs41912594	8	73226920	EBF2	hcr	a	-0.344003	8.1911	2	0.26	0.28763	0.244	1	-0.0838	-0.05637	0.756	658
rs137113406	23	29198023	OR1O8-OR12D2G	hcr	a	0.305235	8.1786	1	0.115	0.14246	0.623	2	-0.19	-0.16278	0.377	659
rs41612156	4	49580096	NRCAM-PNPLA8	hcr	a	0.439067	8.177	1	0.0569	0.08466	0.87	2	-0.382	-0.35441	0.13	660
rs29013523	8	96193360	SNORA70-ZNF462	hcr	a	-0.307684	8.1764	2	0.111	0.13957	0.64	1	-0.197	-0.16811	0.36	661
rs109892864	5	109923576	PLA2G6	hcr	a	-0.323796	8.1761	2	0.0939	0.12193	0.71	1	-0.23	-0.20186	0.29	662
rs109080442	4	33058119	ABCB4	hcr	a	-0.365363	8.175	2	0.0764	0.09991	0.791	1	-0.289	-0.26545	0.209	663
rs137341434	8	82787089	ERCC6L2-ENSBTAG00000053599	hcr	a	0.45328	8.1721	1	0.0545	0.08232	0.88	2	-0.399	-0.37096	0.12	664
rs42738485	19	43162697	NBR1	hcr	a	0.480655	8.1713	1	0.0519	0.0839	0.892	2	-0.429	-0.39675	0.108	665
rs110702257	4	92542300	PRRT4	hcr	a	0.374277	8.1632	1	0.0726	0.09779	0.806	2	-0.302	-0.27649	0.194	666
rs109984473	13	71966801	ENSBTAG00000045300-SRSF6	hcr	a	-0.366415	8.158	2	0.293	0.32237	0.2	1	-0.0732	-0.04405	0.8	667
rs3423563441	29	37756339	LOC784241	hcr	a	-0.360247	8.1535	2	0.076	0.10377	0.789	1	-0.284	-0.25648	0.211	668
rs109745262	9	63311335	SNORD22-U6	hcr	a	-0.304509	8.1496	2	0.111	0.13966	0.634	1	-0.193	-0.16485	0.366	669
rs42249397	8	80838568	DAPK1	hcr	a	0.391347	8.1404	1	0.0664	0.09355	0.83	2	-0.325	-0.2978	0.17	670
rs134218290	3	10890374	OR6N2-OR6N1	hcr	a	0.301285	8.139	1	0.137	0.16891	0.547	2	-0.165	-0.13238	0.453	671
rs137213186	11	45715538	ST6GAL2-UXS1	hcr	a	0.296316	8.1385	1	0.139	0.16564	0.531	2	-0.157	-0.13067	0.469	672
rs41618039	8	98355631	ENSBTAG00000000885-ACTL7B	hcr	a	-0.35065	8.1323	2	0.0799	0.11117	0.772	1	-0.271	-0.23948	0.228	673
rs110752781	8	84212707	IPPK	hcr	a	0.465914	8.1309	1	0.0525	0.0763	0.887	2	-0.413	-0.38962	0.113	674
rs42494019	8	41254175	RFX3	hcr	a	0.298003	8.1303	1	0.125	0.15532	0.582	2	-0.173	-0.14269	0.418	675
rs42310198	9	56488139	ENSBTAG00000003743(u)	hcr	a	-0.334354	8.13	2	0.0876	0.11793	0.738	1	-0.247	-0.21642	0.262	676
rs133091964	20	40746183	bta-mir-12058-ENSBTAG00000052313	hcr	a	-0.300555	8.1272	2	0.128	0.15243	0.574	1	-0.173	-0.14813	0.426	677
rs134444047	15	5046732	ENSBTAG00000051741-ENSBTAG00000047461	hcr	a	0.304633	8.125	1	0.126	0.15013	0.585	2	-0.178	-0.1545	0.415	678
rs110499108	2	125963366	ENSBTAG00000050795-WDTC1	hcr	a	0.297219	8.1244	1	0.128	0.15952	0.569	2	-0.169	-0.1377	0.431	679
rs110790629	9	71522663	EYA4	hcr	a	-0.304251	8.1189	2	0.11	0.13817	0.639	1	-0.194	-0.16609	0.361	680
rs109289569	24	46960289	SKOR2-ENSBTAG00000052001	hcr	a	-0.337629	8.1184	2	0.0849	0.11328	0.749	1	-0.253	-0.22435	0.251	681
rs43062784	10	60099485	ATP8B4	hcr	a	-0.366675	8.1168	2	0.0756	0.09729	0.794	1	-0.291	-0.26939	0.206	682
rs110516220	15	45033954	U6-CYB5R2	hcr	a	-0.520175	8.1111	2	0.0455	0.07283	0.913	1	-0.475	-0.44734	0.0875	683
Hapmap56088-rs29016340	4	17888855	ENSBTAG00000052259(u)	hcr	a	0.44099	8.1062	1	0.0558	0.08221	0.873	2	-0.385	-0.35878	0.127	684
rs109137398	10	65740355	DDHD1	hcr	a	0.295762	8.104	1	0.131	0.16085	0.556	2	-0.164	-0.13491	0.444	685
rs3423174177	4	32502039	ENSBTAG00000015666	hcr	a	0.34329	8.0978	1	0.0822	0.10471	0.761	2	-0.261	-0.23858	0.239	686
rs43713024	10	52379056	ALDH1A2-POLR2M	hcr	a	0.318155	8.097	1	0.0976	0.12575	0.693	2	-0.221	-0.19241	0.307	687
rs110911638	5	31302765	ENSBTAG00000051046-OR8S8	hcr	a	0.510093	8.0945	1	0.0465	0.07185	0.909	2	-0.464	-0.43824	0.0912	688
rs41255551	15	20276441	RDX	hcr	a	0.356989	8.0919	1	0.0797	0.11997	0.777	2	-0.277	-0.23701	0.223	689
rs110651524	20	68990075	ENSBTAG00000050512-IRX1	hcr	a	0.376802	8.091	1	0.306	0.33226	0.188	2	-0.0708	-0.04455	0.812	690
rs43087086	10	52103291	AQP9	hcr	a	-0.316155	8.0876	2	0.0989	0.12762	0.687	1	-0.217	-0.18854	0.313	691
rs42207625	2	39328049	GALNT5-ENSBTAG00000054211	hcr	a	0.294725	8.0863	1	0.138	0.16858	0.533	2	-0.157	-0.12614	0.467	692
rs41906548	19	31395869	ELAC2-ENSBTAG00000052541	hcr	a	0.306788	8.0863	1	0.108	0.13735	0.649	2	-0.199	-0.16943	0.351	693
rs137561637	4	25350318	AGR3	hcr	a	0.296403	8.0786	1	0.164	0.19238	0.446	2	-0.132	-0.10403	0.554	694
rs43378301	4	29919319	SP8-ENSBTAG00000045673	hcr	a	-0.309081	8.0755	2	0.103	0.13131	0.666	1	-0.206	-0.17777	0.334	695
rs109274298	19	35393972	KCNJ12-UTP18	hcr	a	0.347564	8.0726	1	0.0853	0.12343	0.754	2	-0.262	-0.22413	0.246	696
rs110687437	7	43951008	MEX3D	hcr	a	-0.296503	8.0706	2	0.124	0.15244	0.582	1	-0.173	-0.14407	0.418	697
rs41628019	14	28529843	YTHDF3(d)	hcr	a	0.293133	8.0657	1	0.138	0.16663	0.528	2	-0.155	-0.1265	0.472	698
rs136002756	8	96255950	SNORA70-ZNF462	hcr	a	0.310279	8.0642	1	0.123	0.15908	0.602	2	-0.187	-0.1512	0.398	699
rs136435293	19	44391711	FZD2-MEIOC	hcr	a	0.505498	8.0629	1	0.048	0.07788	0.905	2	-0.458	-0.42761	0.0949	700
rs134219973	23	48430464	RREB1-LY86	hcr	a	0.44489	8.0593	1	0.0551	0.08369	0.876	2	-0.39	-0.3612	0.124	701
rs41604697	6	93832672	PAQR3-NAA11	hcr	a	-0.304367	8.0578	2	0.111	0.13359	0.635	1	-0.193	-0.17078	0.365	702
rs109882670	19	31770015	HS3ST3A1	hcr	a	0.301351	8.0545	1	0.168	0.19723	0.444	2	-0.134	-0.10413	0.556	703
rs109102777	1	63602126	IGSF11(u)	hcr	a	-0.455662	8.0537	2	0.0536	0.08508	0.882	1	-0.402	-0.37058	0.118	704
rs137605736	20	64598648	U6(d)	hcr	a	0.3082	8.0523	1	0.197	0.2181	0.362	2	-0.112	-0.0901	0.638	705
rs136655527	24	59493313	ENSBTAG00000054502-ENSBTAG00000047569	hcr	a	0.464599	8.0462	1	0.0515	0.079	0.889	2	-0.413	-0.3856	0.111	706
rs132634291	3	1248526	CD247	hcr	a	-0.303595	8.0444	2	0.123	0.14597	0.596	1	-0.181	-0.15763	0.404	707
rs109461287	14	7894004	ST3GAL1	hcr	a	0.340166	8.0415	1	0.0826	0.10983	0.757	2	-0.258	-0.23033	0.243	708
rs29019286	7	55393142	KCTD16	hcr	a	-0.308353	8.0413	2	0.204	0.23612	0.338	1	-0.104	-0.07223	0.662	709
rs41643993	24	60430245	RNF152-PIGN	hcr	a	-0.328511	8.0407	2	0.0898	0.12634	0.727	1	-0.239	-0.20218	0.273	710
rs110674200	17	17448982	LOC107133280	hcr	a	0.317939	8.0399	1	0.102	0.12989	0.679	2	-0.216	-0.18805	0.321	711
rs136733900	10	57431193	ENSBTAG00000053915(u)	hcr	a	0.302639	8.0392	1	0.115	0.14658	0.62	2	-0.188	-0.15606	0.38	712
rs109049330	7	21978187	LOC107132617	hcr	a	0.294678	8.034	1	0.168	0.19579	0.431	2	-0.127	-0.09889	0.569	713
rs137038596	19	35279651	MAP2K3-KCNJ12	hcr	a	-0.300102	8.0294	2	0.184	0.20894	0.388	1	-0.117	-0.09117	0.612	714
rs110725940	18	65422033	LOC107131481	hcr	a	-0.300892	8.0278	2	0.133	0.17433	0.556	1	-0.167	-0.12657	0.444	715
rs41602510	14	28253443	YTHDF3(d)	hcr	a	-0.407565	8.0261	2	0.0619	0.0904	0.848	1	-0.346	-0.31716	0.152	716
rs3423593848	29	37812460	PAG5-ENSBTAG00000048542	hcr	a	-0.357625	8.0241	2	0.0757	0.10447	0.788	1	-0.282	-0.25315	0.212	717
Hapmap48788-BTA-49979	20	16566822	ENSBTAG00000053188(u)	hcr	a	-0.581411	8.0213	2	0.0396	0.06787	0.932	1	-0.542	-0.51354	0.0681	718
rs43347752	3	80999275	CACHD1	hcr	a	-0.312335	8.0189	2	0.105	0.1269	0.663	1	-0.207	-0.18544	0.337	719
rs41912290	19	34646676	SREBF1	hcr	a	0.296709	8.0137	1	0.12	0.14913	0.596	2	-0.177	-0.14758	0.404	720
rs109159651	8	75371433	UBAP2	hcr	a	-0.30314	8.0121	2	0.191	0.22222	0.371	1	-0.112	-0.08092	0.629	721
rs136999217	24	44582967	SETBP1	hcr	a	0.299235	8.0087	1	0.125	0.14315	0.583	2	-0.174	-0.15609	0.417	722
rs132706741	11	45634674	ST6GAL2-UXS1	hcr	a	0.296085	8.0076	1	0.138	0.16663	0.534	2	-0.158	-0.12945	0.466	723
rs41568388	15	39097150	LOC100297470	hcr	a	0.294756	8.0073	1	0.122	0.15132	0.586	2	-0.173	-0.14343	0.414	724
rs43408600	4	92576547	IMPDH1	hcr	a	-0.336947	8.0006	2	0.0857	0.11283	0.746	1	-0.251	-0.22412	0.254	725
rs136383812	18	62483984	ENSBTAG00000045854-ENSBTAG00000047473	hcr	a	0.296671	8.0001	1	0.122	0.15219	0.588	2	-0.174	-0.14448	0.412	726
'u’ indicates the SNP is upstream of the gene, and ‘d’ indicates the SNP is downstream of the gene.
‘effect’ is the additive effect of the SNP as the difference between allelic effects of ‘allele 1’ and ‘allele 2’ (Equation 10).
‘ae+’ is the allelic effect of the positive allele using Equation 9, and 'ae+2' the allelic effect of the positive allele using Equation 11
‘ae-’ is the allelic effect of the negative allele using Equation 9, and 'ae-2' is the allelic effect of the negative allele using Equation 11.
‘f_al+’ is the frequency of the positive allele. ‘f_al-’ is the requency of the negative allele.
