# Supplementary material for: A Million-Cow Genome-Wide Association Study of Three Fertility Traits in U.S. Holstein Cows
Source: Int J Mol Sci. 2023 Jun 22;24(13):10496. doi: 10.3390/ijms241310496 (PMC10341978; doi:10.3390/ijms241310496)
Supplement: Supplementary file 1 [file ijms-24-10496-s001.zip › Supplementary_materials/Table_S6.xlsx]

## Sheet: s6
rs_num	Chr	position	Candidate gene	Trait	Test	Effect	log10(1/p)	DR	d_DR	f_DR	DD	d_DD	f_DD	RR	d_RR	f_RR	al+	ae+	f_al+	al-	ae-	f_al-	rank
rs111023007	4	23542497	DGKB(d)-U6(d)-ENSBTAG00000054772(u)-AGMO(u)-MEOX2(u)	hcr	d	4.20122	60.9029	12	0.535	0.147	11	-0.0457	0.848	22	-7.29	0.00546	1	0.0573	0.921	2	-0.67	0.0788	1
rs29023731	4	23863959	AGMO	hcr	d	3.69614	51.2548	12	0.491	0.153	22	-0.0439	0.841	11	-6.37	0.00598	2	0.0578	0.918	1	-0.645	0.0823	2
rs136006978	4	28692421	POLR1F(d)-ENSBTAG00000050341(d)-TMEM196(d)-MACC1(u)-ITGB8(u)	hcr	d	1.61363	28.3701	12	0.378	0.256	11	-0.0656	0.724	22	-2.41	0.0204	1	0.076	0.852	2	-0.437	0.148	3
rs42269361	4	27587323	HDAC9	hcr	d	1.61797	26.8665	12	0.376	0.239	22	-0.0605	0.742	11	-2.42	0.0187	2	0.0445	0.862	1	-0.277	0.138	4
rs42739334	6	102065812	KLHL8	hcr	d	3.30732	26.7541	12	0.376	0.116	11	-0.0248	0.88	22	-5.84	0.00376	1	0.0636	0.938	2	-0.962	0.062	5
rs43480825	6	101994654	AFF1	hcr	d	3.3384	26.7061	12	0.37	0.116	11	-0.0243	0.88	22	-5.91	0.00366	1	0.0611	0.938	2	-0.928	0.0618	6
rs43768813	6	101887271	AFF1	hcr	d	3.34893	26.4584	12	0.373	0.114	22	-0.0241	0.882	11	-5.93	0.00361	2	0.0598	0.939	1	-0.925	0.0607	7
rs109933750	6	102164971	PTPN13(d)-ENSBTAG00000047514(d)-ENSBTAG00000050963(d)-C4orf36(d)-U6(d)-AFF1(d)-bta-mir-2284ab(d)-KLHL8(d)-ENSBTAG00000047432(d)-U6(d)-U6(d)-HSD17B13(u)-HSD17B11(u)-ENSBTAG00000052418(u)-NUDT9(u)-SPARCL1(u)-ENSBTAG00000053494(u)-DSPP(u)-DMP1(u)-ENSBTAG00000017829(u)-ENSBTAG00000006508(u)	hcr	d	3.33111	26.2345	12	0.368	0.115	22	-0.024	0.881	11	-5.9	0.00362	2	0.0578	0.939	1	-0.884	0.0614	8
rs42910197	4	34161540	LOC101904927	hcr	d	1.91195	24.6451	12	0.344	0.201	22	-0.0431	0.788	11	-3.09	0.0114	2	0.0594	0.888	1	-0.472	0.112	9
rs42598643	4	24012373	MEOX2	hcr	d	1.35554	19.1147	12	0.311	0.244	11	-0.0508	0.738	22	-2.04	0.0187	1	0.0479	0.86	2	-0.293	0.14	10
rs43377794	4	28307693	TWIST1(d)-FERD3L(d)-POLR1F(u)-ENSBTAG00000050341(u)-TMEM196(u)-MACC1(u)	hcr	d	1.03811	16.5081	12	0.288	0.294	22	-0.0616	0.677	11	-1.44	0.0299	2	0.0808	0.823	1	-0.376	0.177	11
rs42394673	4	34590723	U6(u)	hcr	d	0.93452	11.6959	12	0.245	0.273	11	-0.0472	0.702	22	-1.33	0.0252	1	0.0403	0.838	2	-0.209	0.162	12
rs110248417	8	77960968	NTRK2	hcr	d	1.62035	10.8833	12	0.246	0.147	11	-0.0213	0.847	22	-2.73	0.00658	1	0.0191	0.92	2	-0.22	0.0799	13
rs109080442	4	33058119	ABCB4	hcr	d	0.73761	10.7357	12	0.237	0.333	22	-0.0625	0.625	11	-0.938	0.0425	2	0.0764	0.791	1	-0.289	0.209	14
rs43595191	9	49192024	ASCC3	hcr	d	1.09486	9.8795	12	0.221	0.217	22	-0.0307	0.769	11	-1.72	0.0141	2	0.0395	0.877	1	-0.283	0.123	15
rs41648808	4	35407175	SEMA3D	hcr	d	0.875462	9.7877	12	0.219	0.269	22	-0.0408	0.707	11	-1.27	0.0236	2	0.0693	0.842	1	-0.369	0.158	16
rs137681062	8	76684305	FRMD3	hcr	d	1.40595	9.7846	12	0.233	0.16	22	-0.0225	0.832	11	-2.32	0.00799	2	0.0237	0.912	1	-0.246	0.088	17
rs109946186	6	102066326	KLHL8	hcr	d	1.01905	8.9357	12	0.215	0.216	11	-0.03	0.769	22	-1.58	0.0148	1	0.0612	0.877	2	-0.436	0.123	18
rs109785425	9	48907179	GRIK2(d)-ENSBTAG00000033109(d)-ASCC3(u)	hcr	d	1.05696	8.8167	12	0.21	0.215	11	-0.029	0.771	22	-1.66	0.0138	1	0.0361	0.879	2	-0.262	0.121	19
rs135339063	4	22136608	ETV1	hcr	d	0.735167	8.3817	12	0.206	0.295	22	-0.0445	0.674	11	-1.01	0.0305	2	0.0631	0.822	1	-0.291	0.178	20
rs43383611	4	33375916	ENSBTAG00000005997(d)-ABCB4(d)-CROT(d)-ENSBTAG00000049907(d)-ENSBTAG00000054504(d)-ENSBTAG00000035379(d)-TMEM243(d)-DMTF1(d)-ENSBTAG00000053479(d)-ENSBTAG00000049818(d)-ENSBTAG00000019276(u)-ELAPOR2(u)-GRM3(u)	hcr	d	0.672674	8.2889	12	0.207	0.317	11	-0.0504	0.646	22	-0.882	0.0373	1	0.0387	0.804	2	-0.159	0.196	21
rs43379389	4	31051367	RAPGEF5	hcr	d	0.580594	8.2628	12	0.202	0.37	22	-0.0632	0.575	11	-0.695	0.0552	2	0.0947	0.76	1	-0.3	0.24	22
rs109929073	4	23829708	AGMO	hcr	d	0.757207	8.1949	12	0.208	0.286	11	-0.0429	0.686	22	-1.06	0.0284	1	0.0468	0.829	2	-0.226	0.171	23
rs3423170459	4	32816610	LOC101902435	hcr	d	0.685408	8.1617	12	0.209	0.313	11	-0.0498	0.651	22	-0.904	0.0363	1	0.0517	0.807	2	-0.217	0.193	24
rs110970585	4	29633678	ABCB5(d)-SP8(d)-ENSBTAG00000045673(u)	hcr	d	0.465155	8.0006	12	0.203	0.449	11	-0.101	0.442	22	-0.423	0.109	1	0.105	0.666	2	-0.21	0.334	25
'u’ indicates the SNP is upstream of the gene, and ‘d’ indicates the SNP is downstream of the gene.
‘effect’ is the dominance effect of the SNP as the difference between the heterozygous dominance value and the average of the two homozygous dominance values (Equation 12).
‘d_DR’ is the dominance value of the heterozygous genotype with one dominant allele (D) and one recessive allele (R) (Equation 13).
‘DR’ is the heterozygous genotype with one dominant allele and one recessive allele.
‘d_DR’ is the dominance value of the heterozygous genotype with one dominant allele (D) and one recessive allele (R) (Equation 13).
‘DD’ is the homozygous genotype with two dominant alleles.
‘d_DD’ is the dominance value of the homozygous genotype with two dominant alleles (DD) (Equation 13).
‘RR’ is the homozygous genotype with two recessive alleles.
‘d_RR’ is the dominance value of the homozygous genotype with two recessive alleles (RR) (Equation 13).
‘f_DR’ is the frequency of the heterozygous genotype.
‘f_DD’ is the frequency of the homozygous genotype of the dominant allele.
‘f_RR’ is the frequency of the homozygous genotype of the recessive allele. ‘f_R’ is the frequency of the recessive allele.
‘ae+’ is the allelic effect of the positive allele using Equation 9.
‘ae-’ is the allelic effect of the negative allele using Equation 9.
‘f_al+’ is the frequency of the positive allele. ‘f_al-’ is the requency of the negative allele.
