# Supplementary material for: A Million-Cow Genome-Wide Association Study of Three Fertility Traits in U.S. Holstein Cows
Source: Int J Mol Sci. 2023 Jun 22;24(13):10496. doi: 10.3390/ijms241310496 (PMC10341978; doi:10.3390/ijms241310496)
Supplement: Supplementary file 1 [file ijms-24-10496-s001.zip › Supplementary_materials/Table_S7.xlsx]

## Sheet: s7
SNP	Chr	position	Candidate gene	DPR_rank	HCR_rank	CCR_rank
rs109155375	1	62364649	bta-mir-2285de(u)	183	238	299
rs137209107	1	68043046	MYLK	215	58	568
rs133450760	1	68949628	KALRN	618	283	879
rs137814900	1	70735271	TFRC-ZDHHC19	125	141	188
rs41897673	1	111868602	SLC33A1-C1H3orf33	397	47	170
rs136875114	1	130963070	DBR1-A4GNT	539	307	257
rs110736095	1	133687413	PPP2R3A-ENSBTAG00000051032	359	655	676
rs42371092	6	61697427	GRXCR1	900	330	982
rs109377247	6	85896097	LOC100848253	28	381	72
rs41604697	6	93832672	PAQR3-NAA11	95	702	274
rs379236718	8	81085852	FBP1	462	452	693
rs137341434	8	82787089	ERCC6L2-ENSBTAG00000053599	240	664	309
rs41587051	8	84050346	CENPP-OMD	155	576	180
rs110752781	8	84212707	IPPK	163	674	176
rs42737642	8	84297085	BICD2	201	622	158
rs41594926	8	84402125	FGD3	159	595	151
rs41593792	8	84472391	SUSD3-CARD19	327	291	297
rs135978971	9	71245136	EYA4 (u)	329	322	108
rs136299358	9	71292789	EYA4 (u)	148	189	44
rs110790629	9	71522663	EYA4	415	680	142
rs109830365	9	71565043	EYA4	425	539	175
rs41662471	9	72186135	SLC2A12	294	445	110
rs110282352	10	58971737	GLDN	626	33	294
rs110304273	10	58999970	GLDN	621	434	558
rs43335166	10	59343821	TNFAIP8L3	716	574	422
rs133531749	10	59807572	USP8	772	186	530
rs109112702	10	60440273	LOC112448487	709	344	251
rs134404801	10	60807297	FGF7	689	618	532
rs110901772	10	60986053	GALK2	411	251	216
rs109565014	10	62005356	FBN1-DUT	782	462	285
rs41597796	10	66129758	U6-U6	954	234	523
rs41611714	10	66406378	U6-BMP4	847	405	507
rs109611920	10	66542380	BMP4-CDKN3	947	368	440
rs134205369	10	67019894	CGRRF1	973	456	423
rs109116362	10	67183570	SAMD4A	742	178	247
rs110500404	10	68164248	KTN1-ENSBTAG00000049100	968	226	253
rs109511274	10	68176383	ENSBTAG00000049100	984	265	482
rs42230125	10	68307915	ENSBTAG00000049100	779	475	405
rs135316717	10	68394131	ENSBTAG00000049100-PELI2	785	447	475
rs41903746	10	68473770	LOC101903945	792	215	465
rs42223324	10	68706049	PELI2	942	573	320
rs43639551	10	69722290	SNORA72-NAA30	704	439	721
rs43638613	10	69778006	NAA30	675	514	561
rs111004845	19	27355811	SHBG (d)	46	37	186
rs110401500	19	31252963	ARHGAP44	296	295	348
rs41621822	19	31902307	LOC112442639	950	83	628
rs133729181	19	32106657	COX10	486	35	409
rs41257332	19	33443229	TTC19	739	211	606
rs42617560	19	35925135	WFIKKN2-ENSBTAG00000042852	843	134	813
rs110215185	23	28830632	TRIM40	393	500	318
