# Supplementary material for: A Million-Cow Genome-Wide Association Study of Three Fertility Traits in U.S. Holstein Cows
Source: Int J Mol Sci. 2023 Jun 22;24(13):10496. doi: 10.3390/ijms241310496 (PMC10341978; doi:10.3390/ijms241310496)
Supplement: Supplementary file 1 [file ijms-24-10496-s001.zip › Supplementary_materials/Table_S8.xlsx]

## Sheet: s8
SNP	Chr	position	candidate gene	Trait	Test	Effect	log10(1/p)	mu	u1	u2	g11	g12	g22	y11	y12	y22	NI	n_11	n_12	n_22	# cows	DR	d_DR	f_DR	DD	d_DD	f_DD	RR	d_RR	f_RR	al+	ae+	ae+2	f_al+	al-	ae-	ae-2	f_al-
rs110035804	1	68293671	CCDC14	Cow conception rate (CCR)	d	2.47869	10.7928	11.8218	11.8824	10.7173	11.929	11.0307	5.17496	12.7001	10.8534	3.31938	-8.45738	805720	88218	2494	896432	12	0.253	0.0984	11	-0.0139	0.899	22	-4.44	0.00278	1	0.0606	0.07845	0.948	2	-1.1	-1.08661	0.052
rs110035804	1	68293671	CCDC14	Daughter pregnancy rate (DPR)	d	1.64083	10.7634	8.20783	8.26389	7.17457	8.31064	7.40018	3.20807	8.37583	6.91874	1.47948	-6.1678	962594	104186	2963	1069743	12	0.17	0.0974	11	-0.00932	0.9	22	-2.93	0.00277	1	0.0561	0.064294	0.949	2	-1.03	-1.02503	0.0515
rs110035804	1	68293671	CCDC14	Age at first calving (AFC)	d	0.653349	0.4982	12.8463	12.9154	11.6466	12.9804	11.7852	9.28337	14.3742	11.9753	7.4587	-5.71607	843022	96987	2845	942854	12	0.0696	0.103	11	-0.00408	0.894	22	-1.16	0.00302	1	0.0691	0.10383	0.946	2	-1.2	-1.16499	0.0545
rs110035804	1	68293671	CCDC14	Fat yield (FY)	d	0.383524	0.275	44.095	44.1199	43.629	44.1425	43.6942	42.4789	61.9348	52.9778	43.4889	-13.9673	1075228	114396	3246	1192870	12	0.0404	0.0959	11	-0.00223	0.901	22	-0.684	0.00272	1	0.0249	0.13598	0.949	2	-0.466	-0.35493	0.0507
rs110035804	1	68293671	CCDC14	Heifer conception rate (HCR)	d	0.471669	0.3737	14.6837	14.7209	13.951	14.7556	14.0353	12.3718	15.4986	14.53	12.5869	-2.42742	944170	95550	2551	1042271	12	0.0472	0.0917	11	-0.00248	0.906	22	-0.847	0.00245	1	0.0372	0.06269	0.952	2	-0.733	-0.70718	0.0483
rs110035804	1	68293671	CCDC14	Milk yield (MY)	d	8.35016	0.21	1311.54	1310.8	1325.43	1310.02	1325.49	1324.26	1612.57	1491.53	1344.53	-207.525	1094056	115994	3275	1213325	12	0.804	0.0956	11	-0.0402	0.902	22	-15.1	0.0027	2	13.9	15.8509	0.0505	1	-0.739	1.2239	0.95
rs110035804	1	68293671	CCDC14	Protein yield (PY)	d	0.170112	0.1064	37.2122	37.2039	37.3689	37.1946	37.3773	37.2198	49.6596	43.796	37.4079	-9.31994	1075228	114395	3246	1192869	12	0.0168	0.0959	11	-0.000867	0.901	22	-0.306	0.00272	2	0.157	0.20275	0.0507	1	-0.00836	0.03776	0.949
rs132847403	1	68792344	KALRN	Cow conception rate (CCR)	d	2.57171	11.2988	11.8312	11.8972	10.5969	11.9494	10.9185	4.74419	12.7144	10.8068	3.11262	-8.64799	825353	88077	2420	915850	12	0.256	0.0962	11	-0.0137	0.901	22	-4.62	0.00264	1	0.066	0.0933	0.949	2	-1.23	-1.20701	0.0507
rs132847403	1	68792344	KALRN	Daughter pregnancy rate (DPR)	d	1.6437	10.5944	8.21543	8.27132	7.16105	8.31825	7.38362	3.1616	8.37988	6.9603	1.65936	-6.01073	985373	104187	2899	1092459	12	0.167	0.0954	11	-0.00896	0.902	22	-2.95	0.00265	1	0.0559	0.071724	0.95	2	-1.05	-1.03855	0.0503
rs132847403	1	68792344	KALRN	Age at first calving (AFC)	d	0.750436	0.6427	12.8299	12.9016	11.5551	12.9688	11.7051	8.94062	14.3578	11.8884	7.17691	-5.9462	863451	96979	2783	963213	12	0.0784	0.101	11	-0.00449	0.896	22	-1.34	0.00289	1	0.0717	0.09001	0.947	2	-1.27	-1.25651	0.0532
rs132847403	1	68792344	KALRN	Fat yield (FY)	d	0.375935	0.2589	44.0763	44.1038	43.5481	44.1293	43.6146	42.348	61.8576	52.7075	42.6486	-14.634	1100319	114466	3172	1217957	12	0.0389	0.094	11	-0.00211	0.903	22	-0.672	0.0026	1	0.0276	0.11991	0.95	2	-0.528	-0.43583	0.0496
rs132847403	1	68792344	KALRN	Heifer conception rate (HCR)	d	0.362327	0.2137	14.6874	14.7244	13.9372	14.7597	14.0092	12.5341	15.4997	14.4937	12.7736	-2.2231	966423	95258	2443	1064124	12	0.0349	0.0895	11	-0.00179	0.908	22	-0.653	0.0023	1	0.037	0.06622	0.953	2	-0.75	-0.72099	0.0471
rs132847403	1	68792344	KALRN	Milk yield (MY)	d	9.71271	0.2778	1311.25	1310.46	1326.41	1309.63	1326.54	1324.03	1610.92	1492.48	1336.03	-215.678	1119759	115957	3208	1238924	12	0.919	0.0936	11	-0.045	0.904	22	-17.5	0.00259	2	15.2	16.8329	0.0494	1	-0.788	0.8839	0.951
rs132847403	1	68792344	KALRN	Protein yield (PY)	d	0.113823	0.0472	37.2028	37.195	37.3515	37.1867	37.3546	37.2949	49.6034	43.7885	37.3764	-9.31952	1100319	114465	3172	1217956	12	0.0109	0.094	11	-0.000542	0.903	22	-0.205	0.0026	2	0.149	0.1854	0.0496	1	-0.00776	0.02892	0.95
rs109790791	1	69102381	KALRN	Cow conception rate (CCR)	d	2.21192	9.2788	11.8343	11.8994	10.6832	11.9514	10.9797	5.5842	12.7299	10.7969	3.81492	-7.9485	820601	92700	2695	915996	12	0.231	0.101	11	-0.0132	0.896	22	-3.95	0.00294	1	0.0651	0.09554	0.946	2	-1.15	-1.12066	0.0535
rs109790791	1	69102381	KALRN	Daughter pregnancy rate (DPR)	d	1.47887	9.4849	8.21705	8.2743	7.19555	8.32258	7.41041	3.54051	8.39279	6.93359	1.95455	-5.70864	979987	109549	3220	1092756	12	0.158	0.1	11	-0.00897	0.897	22	-2.63	0.00295	1	0.0573	0.074696	0.947	2	-1.02	-1.00405	0.0531
rs109790791	1	69102381	KALRN	Age at first calving (AFC)	d	0.732784	0.6781	12.8332	12.9074	11.5865	12.9768	11.7412	9.04013	14.3653	11.9947	7.4971	-5.68289	858321	102036	3100	963457	12	0.0805	0.106	11	-0.00488	0.891	22	-1.3	0.00322	1	0.0742	0.09584	0.944	2	-1.25	-1.22509	0.0562
rs109790791	1	69102381	KALRN	Fat yield (FY)	d	0.499336	0.5017	44.0746	44.0883	43.8278	44.0989	43.8946	42.6917	61.9018	52.8525	42.4821	-14.8951	1094357	120419	3540	1218316	12	0.0532	0.0988	11	-0.00297	0.898	22	-0.889	0.00291	1	0.0136	0.10436	0.948	2	-0.247	-0.15605	0.0523
rs109790791	1	69102381	KALRN	Heifer conception rate (HCR)	d	0.357061	0.225	14.6872	14.7247	13.9618	14.7603	14.035	12.5955	15.5032	14.5117	12.7476	-2.25985	962163	99396	2661	1064220	12	0.0356	0.0934	11	-0.00191	0.904	22	-0.641	0.0025	1	0.0375	0.06648	0.951	2	-0.725	-0.69637	0.0492
rs109790791	1	69102381	KALRN	Milk yield (MY)	d	8.36965	0.2295	1311.24	1310	1333.68	1308.73	1333.25	1341.04	1610.61	1502.63	1359.92	-196.692	1113734	121988	3584	1239306	12	0.802	0.0984	11	-0.0393	0.899	22	-15.1	0.00289	2	22.4	24.1099	0.0521	1	-1.23	0.4269	0.948
rs109790791	1	69102381	KALRN	Protein yield (PY)	d	0.110206	0.0491	37.2025	37.1826	37.5622	37.1623	37.5528	37.7228	49.6135	44.055	37.994	-8.84024	1094357	120418	3540	1218315	12	0.0104	0.0988	11	-0.000502	0.898	22	-0.199	0.00291	2	0.36	0.39611	0.0523	1	-0.0199	0.01654	0.948
rs111023007	4	23542497	AGMO (u)	Cow conception rate (CCR)	d	2.04343	11.6321	11.8315	11.8577	11.4975	11.8665	11.7482	7.54301	12.5327	12.4653	8.23751	-4.26149	795567	126694	4015	926276	12	0.224	0.137	11	-0.0175	0.859	22	-3.62	0.00433	1	0.0262	0.05383	0.927	2	-0.334	-0.30638	0.0727
rs111023007	4	23542497	AGMO (u)	Daughter pregnancy rate (DPR)	d	1.23076	9.9414	8.21744	8.23363	8.01484	8.23898	8.16775	5.63502	8.27784	8.02436	5.39245	-2.75864	946097	153580	4934	1104611	12	0.137	0.139	11	-0.0108	0.856	22	-2.18	0.00447	1	0.0162	0.03403	0.926	2	-0.203	-0.184757	0.074
rs111023007	4	23542497	AGMO (u)	Age at first calving (AFC)	d	4.87194	35.5247	12.8373	12.8685	12.4201	12.8606	12.972	3.33954	14.0691	14.5337	4.95249	-9.34887	842649	128089	3893	974631	12	0.521	0.131	11	-0.0391	0.865	22	-8.66	0.00399	1	0.0313	0.05692	0.93	2	-0.417	-0.39153	0.0697
rs111023007	4	23542497	AGMO (u)	Fat yield (FY)	d	2.52492	19.6221	44.0659	43.952	45.4612	43.8103	45.6608	42.4615	59.5158	68.8738	69.4728	5.27798	1051109	174292	5800	1231201	12	0.314	0.142	11	-0.0277	0.854	22	-4.39	0.00471	2	1.4	1.4773	0.0755	1	-0.114	-0.0319	0.925
rs111023007	4	23542497	AGMO (u)	Heifer conception rate (HCR)	d	4.20122	60.9029	14.6858	14.7431	14.0159	14.7547	14.6086	6.06012	15.5243	15.0282	6.06843	-9.20782	911675	157714	5875	1075264	12	0.535	0.147	11	-0.0457	0.848	22	-7.29	0.00546	1	0.0573	0.0849	0.921	2	-0.67	-0.64228	0.0788
rs111023007	4	23542497	AGMO (u)	Milk yield (MY)	d	61.0481	18.599	1311.11	1308.93	1337.79	1306.09	1343.1	1258.03	1571.44	1755.53	1734.57	71.088	1068832	177656	5913	1252401	12	7.49	0.142	11	-0.657	0.853	22	-106	0.00472	2	26.7	28.2189	0.0756	1	-2.18	-0.6481	0.924
rs111023007	4	23542497	AGMO (u)	Protein yield (PY)	d	1.73746	18.0505	37.1988	37.1315	38.0223	37.0455	38.169	35.8177	47.9815	54.8628	55.6093	4.1871	1051108	174292	5800	1231200	12	0.214	0.142	11	-0.0188	0.854	22	-3.03	0.00471	2	0.824	0.85622	0.0755	1	-0.0672	-0.03456	0.925
rs29023731	4	23863959	AGMO	Cow conception rate (CCR)	d	1.59528	7.8988	11.8292	11.5119	11.8554	8.38992	11.7235	11.8665	9.09188	12.4252	12.5348	-3.38813	4486	132386	787569	924441	12	0.185	0.143	22	-0.0152	0.852	11	-2.8	0.00485	2	0.0263	0.05152	0.924	1	-0.317	-0.29199	0.0765
rs29023731	4	23863959	AGMO	Daughter pregnancy rate (DPR)	d	1.01837	7.5393	8.21665	8.00075	8.23488	5.99531	8.13764	8.24323	5.8232	8.00978	8.27971	-2.32154	5485	160710	936379	1102574	12	0.119	0.146	22	-0.00988	0.849	11	-1.79	0.00497	2	0.0182	0.035282	0.922	1	-0.216	-0.198854	0.0779
rs29023731	4	23863959	AGMO	Age at first calving (AFC)	d	4.26179	30.5159	12.8364	12.3683	12.8737	4.38355	12.8898	12.8725	5.8096	14.3292	14.0986	-8.4043	4400	134730	833233	972363	12	0.484	0.139	22	-0.0386	0.857	11	-7.52	0.00453	2	0.0373	0.06215	0.926	1	-0.468	-0.44333	0.0738
rs29023731	4	23863959	AGMO	Fat yield (FY)	d	2.21996	16.7486	44.0669	45.282	43.9622	42.664	45.4672	43.8306	67.6469	67.712	59.6823	3.9497	6442	182072	1040667	1229181	12	0.29	0.148	22	-0.027	0.847	11	-3.83	0.00524	1	1.22	1.29806	0.0793	2	-0.105	-0.02169	0.921
rs29023731	4	23863959	AGMO	Heifer conception rate (HCR)	d	3.69614	51.2548	14.6858	14.0411	14.7436	7.03036	14.5901	14.7575	7.04445	15.0099	15.5314	-8.22621	6418	163938	903647	1074003	12	0.491	0.153	22	-0.0439	0.841	11	-6.37	0.00598	2	0.0578	0.08537	0.918	1	-0.645	-0.61706	0.0823
rs29023731	4	23863959	AGMO	Milk yield (MY)	d	54.556	16.3909	1311.1	1334.94	1309.05	1264.41	1339.93	1306.34	1705.36	1730.9	1574.84	52.4875	6565	185542	1058244	1250351	12	7.05	0.148	22	-0.65	0.846	11	-94.4	0.00525	1	23.8	25.3629	0.0794	2	-2.06	-0.5281	0.921
rs29023731	4	23863959	AGMO	Protein yield (PY)	d	1.52775	15.4129	37.1992	37.935	37.1359	36.03	38.0699	37.0542	54.5576	54.045	48.0917	3.48922	6442	182072	1040666	1229180	12	0.198	0.148	22	-0.0183	0.847	11	-2.64	0.00524	1	0.736	0.76894	0.0793	2	-0.0634	-0.03023	0.921
rs43768813	6	101887271	AFF1	Cow conception rate (CCR)	d	2.86819	21.1187	11.8306	11.0584	11.8836	5.24937	11.4496	11.9135	4.19661	11.583	12.6692	-7.92949	3757	111555	810772	926084	12	0.338	0.12	22	-0.0232	0.875	11	-5.04	0.00406	2	0.0531	0.07975	0.936	1	-0.772	-0.74555	0.0643
rs43768813	6	101887271	AFF1	Daughter pregnancy rate (DPR)	d	1.94763	21.7593	8.21685	7.68626	8.25291	3.72899	7.94893	8.27361	2.96469	7.7579	8.31705	-5.07278	4375	131826	968138	1104339	12	0.227	0.119	22	-0.0154	0.877	11	-3.43	0.00396	2	0.0361	0.053314	0.936	1	-0.531	-0.513336	0.0636
rs43768813	6	101887271	AFF1	Age at first calving (AFC)	d	4.99216	38.8182	12.8358	11.7086	12.9156	1.82795	12.3828	12.9534	0.235153	12.6082	14.37	-13.254	4111	120499	849688	974298	12	0.594	0.124	22	-0.042	0.872	11	-8.75	0.00422	2	0.0797	0.10397	0.934	1	-1.13	-1.10298	0.0661
rs43768813	6	101887271	AFF1	Fat yield (FY)	d	0.0378841	0.0042	44.0645	43.2318	44.1205	42.3308	43.2915	44.1763	46.6394	54.6095	61.8023	-11.5665	4820	145558	1080644	1231022	12	0.00365	0.118	22	-0.000187	0.878	11	-0.0683	0.00392	2	0.056	0.13662	0.937	1	-0.833	-0.75211	0.063
rs43768813	6	101887271	AFF1	Heifer conception rate (HCR)	d	3.34893	26.4584	14.6879	13.7625	14.7477	6.90973	14.1956	14.7835	5.80599	14.27	15.5887	-9.12336	3883	122909	948787	1075579	12	0.373	0.114	22	-0.0241	0.882	11	-5.93	0.00361	2	0.0598	0.08954	0.939	1	-0.925	-0.89565	0.0607
rs43768813	6	101887271	AFF1	Milk yield (MY)	d	3.852	0.0665	1311.04	1299.46	1311.81	1281.09	1300.68	1312.56	1358.99	1495.51	1613.15	-195.332	4881	147658	1099648	1252187	12	0.438	0.118	22	-0.0287	0.878	11	-6.8	0.0039	2	0.776	2.2379	0.937	1	-11.6	-10.1121	0.0629
rs43768813	6	101887271	AFF1	Protein yield (PY)	d	0.0467329	0.0121	37.1965	37.0215	37.2082	36.7639	37.0385	37.2197	40.3162	45.1734	49.5452	-7.04308	4820	145557	1080644	1231021	12	0.00528	0.118	22	-0.000343	0.878	11	-0.0826	0.00392	2	0.0118	0.04215	0.937	1	-0.175	-0.14464	0.063
rs43480825	6	101994654	AFF1	Cow conception rate (CCR)	d	2.671	18.8749	11.8298	11.8843	11.0552	11.9167	11.4254	5.59215	12.6672	11.608	4.6211	-7.51655	808556	114183	3869	926608	12	0.316	0.123	11	-0.0221	0.873	22	-4.69	0.00418	1	0.0545	0.08044	0.934	2	-0.775	-0.74867	0.0658
rs43480825	6	101994654	AFF1	Daughter pregnancy rate (DPR)	d	1.7945	19.0726	8.21669	8.25368	7.68461	8.27609	7.93189	3.9987	8.31249	7.79204	3.32751	-4.72475	965949	134599	4515	1105063	12	0.21	0.122	11	-0.0146	0.874	22	-3.15	0.00409	1	0.037	0.054076	0.935	2	-0.532	-0.514988	0.065
rs43480825	6	101994654	AFF1	Age at first calving (AFC)	d	4.72896	36.0696	12.8348	12.917	11.7047	12.9582	12.3528	2.28945	14.38	12.5803	0.539382	-12.9408	846786	123723	4258	974767	12	0.566	0.127	11	-0.041	0.869	22	-8.29	0.00437	1	0.0822	0.10542	0.932	2	-1.13	-1.10686	0.0678
rs43480825	6	101994654	AFF1	Fat yield (FY)	d	0.213883	0.1297	44.0642	44.1276	43.14	44.1895	43.2273	41.8374	61.9319	53.9149	44.5277	-13.3956	1078642	148282	4970	1231894	12	0.0239	0.12	11	-0.00154	0.876	22	-0.378	0.00403	1	0.0634	0.14371	0.936	2	-0.924	-0.8439	0.0642
rs43480825	6	101994654	AFF1	Heifer conception rate (HCR)	d	3.3384	26.7061	14.6858	14.7469	13.7581	14.7837	14.1895	6.91842	15.5896	14.2744	5.79941	-9.13262	947319	125087	3944	1076350	12	0.37	0.116	11	-0.0243	0.88	22	-5.91	0.00366	1	0.0611	0.08867	0.938	2	-0.928	-0.90006	0.0618
rs43480825	6	101994654	AFF1	Milk yield (MY)	d	7.66844	0.2655	1311.04	1311.91	1298.37	1312.71	1300.12	1272.19	1615.59	1482.21	1315.58	-233.315	1097704	150374	5029	1253107	12	0.884	0.12	11	-0.0593	0.876	22	-13.5	0.00401	1	0.867	2.3319	0.936	2	-12.7	-11.2051	0.064
rs43480825	6	101994654	AFF1	Protein yield (PY)	d	0.152669	0.1283	37.1967	37.2119	36.9752	37.2259	37.0081	36.4849	49.6302	44.7144	38.9732	-8.19908	1078642	148281	4970	1231893	12	0.0177	0.12	11	-0.00119	0.876	22	-0.269	0.00403	1	0.0152	0.04582	0.936	2	-0.221	-0.19088	0.0642
rs42739334	6	102065812	KLHL8	Cow conception rate (CCR)	d	2.72372	20.0539	11.8333	11.8927	10.9954	11.9288	11.3843	5.39247	12.6857	11.533	4.35386	-7.75552	805753	114335	3968	924056	12	0.33	0.124	11	-0.0233	0.872	22	-4.77	0.00429	1	0.0594	0.0888	0.934	2	-0.838	-0.80846	0.0662
rs42739334	6	102065812	KLHL8	Daughter pregnancy rate (DPR)	d	1.95228	23.1322	8.21803	8.25799	7.64833	8.28151	7.92304	3.66	8.32072	7.7638	2.96314	-5.07912	962094	135140	4654	1101888	12	0.235	0.123	11	-0.0164	0.873	22	-3.42	0.00422	1	0.04	0.058389	0.934	2	-0.57	-0.551266	0.0655
rs42739334	6	102065812	KLHL8	Age at first calving (AFC)	d	4.68846	36.5201	12.8359	12.919	11.7044	12.9598	12.3646	2.3925	14.4078	12.4657	0.180638	-13.2561	843503	124183	4402	972088	12	0.577	0.128	11	-0.0423	0.868	22	-8.18	0.00453	1	0.0831	0.1074	0.932	2	-1.13	-1.10716	0.0684
rs42739334	6	102065812	KLHL8	Fat yield (FY)	d	0.104765	0.0326	44.0649	44.1333	43.0787	44.2008	43.1591	41.9079	62.0066	53.6283	44.0503	-13.7671	1074235	148984	5116	1228335	12	0.0121	0.121	11	-0.000794	0.875	22	-0.185	0.00416	1	0.0683	0.14937	0.935	2	-0.986	-0.90517	0.0648
rs42739334	6	102065812	KLHL8	Heifer conception rate (HCR)	d	3.30732	26.7541	14.6879	14.7515	13.7255	14.7903	14.1646	6.92434	15.5976	14.2475	5.82293	-9.09963	944357	125030	4037	1073424	12	0.376	0.116	11	-0.0248	0.88	22	-5.84	0.00376	1	0.0636	0.09328	0.938	2	-0.962	-0.93274	0.062
rs42739334	6	102065812	KLHL8	Milk yield (MY)	d	6.17235	0.1776	1311.03	1312.04	1296.47	1313	1298.21	1271.07	1617.84	1471.81	1270.91	-273.908	1093209	151077	5179	1249465	12	0.735	0.121	11	-0.0503	0.875	22	-10.8	0.00414	1	1.01	2.4649	0.935	2	-14.6	-13.1091	0.0646
rs42739334	6	102065812	KLHL8	Protein yield (PY)	d	0.157321	0.1396	37.1968	37.2167	36.9101	37.2352	36.9487	36.3475	49.696	44.4352	38.0704	-8.99519	1074235	148983	5116	1228334	12	0.0188	0.121	11	-0.00129	0.875	22	-0.276	0.00416	1	0.0199	0.05056	0.935	2	-0.287	-0.25602	0.0648
rs109933750	6	102164971	KLHL8-HSD17B13	Cow conception rate (CCR)	d	2.73006	19.5006	11.8331	11.0969	11.8847	5.56702	11.4705	11.9138	4.57695	11.638	12.6666	-7.57536	3826	113280	806908	924014	12	0.322	0.123	22	-0.0225	0.873	11	-4.79	0.00414	2	0.0516	0.0808	0.935	1	-0.736	-0.70699	0.0654
rs109933750	6	102164971	KLHL8-HSD17B13	Daughter pregnancy rate (DPR)	d	1.94611	22.0022	8.21773	7.70395	8.25323	3.76521	7.9653	8.27318	3.06347	7.81047	8.31117	-4.99735	4431	133553	963843	1101827	12	0.226	0.121	22	-0.0156	0.875	11	-3.42	0.00402	2	0.0355	0.053627	0.935	1	-0.514	-0.495655	0.0646
rs109933750	6	102164971	KLHL8-HSD17B13	Age at first calving (AFC)	d	4.6495	34.4411	12.8345	11.7142	12.9155	2.44196	12.3488	12.9567	0.823619	12.5911	14.3775	-12.6607	4199	122694	845149	972042	12	0.554	0.126	22	-0.0399	0.869	11	-8.15	0.00432	2	0.081	0.10394	0.933	1	-1.12	-1.09743	0.0674
rs109933750	6	102164971	KLHL8-HSD17B13	Fat yield (FY)	d	0.184777	0.0953	44.0662	43.1861	44.1262	41.9776	43.266	44.185	44.9725	54.1042	61.9193	-13.0393	4862	147054	1076338	1228254	12	0.0199	0.12	22	-0.00124	0.876	11	-0.328	0.00396	2	0.06	0.14231	0.936	1	-0.88	-0.79776	0.0638
rs109933750	6	102164971	KLHL8-HSD17B13	Heifer conception rate (HCR)	d	3.33111	26.2345	14.6871	13.803	14.7449	7.01648	14.2287	14.7787	5.91319	14.3122	15.5847	-9.03525	3888	123959	945501	1073348	12	0.368	0.115	22	-0.024	0.881	11	-5.9	0.00362	2	0.0578	0.08666	0.939	1	-0.884	-0.85522	0.0614
rs109933750	6	102164971	KLHL8-HSD17B13	Milk yield (MY)	d	8.04853	0.2862	1311.06	1299.35	1311.86	1273.42	1301.06	1312.6	1323.87	1488.05	1615.09	-227.707	4919	149164	1095298	1249381	12	0.914	0.119	22	-0.0606	0.877	11	-14.2	0.00394	2	0.796	2.2849	0.936	1	-11.7	-10.2281	0.0636
rs109933750	6	102164971	KLHL8-HSD17B13	Protein yield (PY)	d	0.219488	0.2572	37.1977	37.0072	37.2107	36.4297	37.0454	37.222	39.0332	44.8744	49.6206	-8.21428	4862	147053	1076338	1228253	12	0.0252	0.12	22	-0.00169	0.876	11	-0.387	0.00396	2	0.013	0.04463	0.936	1	-0.191	-0.15891	0.0638
rs41884737	18	43786051	CEBPG (u)	Cow conception rate (CCR)	d	4.49905	69.0954	11.8311	11.9314	10.6364	11.9819	11.334	1.68795	12.7365	11.5809	0.978765	-11.1799	786921	133006	5184	925111	12	0.597	0.144	11	-0.0499	0.851	22	-7.75	0.0056	1	0.1	0.12754	0.923	2	-1.19	-1.16745	0.0775
rs41884737	18	43786051	CEBPG (u)	Daughter pregnancy rate (DPR)	d	2.7834	59.2999	8.21823	8.29555	7.28553	8.34289	7.72785	1.54602	8.39467	7.524	0.853946	-7.10539	940382	156827	6043	1103252	12	0.365	0.142	11	-0.03	0.852	22	-4.81	0.00548	1	0.0773	0.09595	0.923	2	-0.933	-0.91407	0.0766
rs41884737	18	43786051	CEBPG (u)	Age at first calving (AFC)	d	0.73574	1.1864	12.8364	12.8683	12.4635	12.8919	12.5932	10.823	14.2308	13.4239	10.8764	-2.95097	825497	142017	5613	973127	12	0.0978	0.146	11	-0.00821	0.848	22	-1.27	0.00577	1	0.0319	0.05668	0.921	2	-0.373	-0.34808	0.0787
rs41884737	18	43786051	CEBPG (u)	Fat yield (FY)	d	0.725777	1.8868	44.0661	44.0177	44.6547	43.9609	44.705	43.9976	61.5819	57.3013	49.8113	-9.63031	1049727	173497	6647	1229871	12	0.0987	0.141	11	-0.00843	0.854	22	-1.25	0.0054	2	0.589	0.67078	0.0759	1	-0.0484	0.03379	0.924
rs41884737	18	43786051	CEBPG (u)	Heifer conception rate (HCR)	d	0.484212	0.8024	14.6857	14.7003	14.5026	14.7102	14.5782	13.4779	15.4526	15.1484	13.5941	-1.70636	921171	148017	5464	1074652	12	0.061	0.138	11	-0.00481	0.857	22	-0.842	0.00508	1	0.0146	0.04214	0.926	2	-0.183	-0.15562	0.074
rs41884737	18	43786051	CEBPG (u)	Milk yield (MY)	d	10.31	0.624	1311.07	1308.54	1341.92	1305.87	1340.89	1355.3	1605.11	1565.13	1465.94	-119.178	1068124	176175	6741	1251040	12	1.51	0.141	11	-0.138	0.854	22	-17.5	0.00539	2	30.9	32.3429	0.0758	1	-2.53	-1.0401	0.924
rs41884737	18	43786051	CEBPG (u)	Protein yield (PY)	d	0.0722367	0.0384	37.1969	37.1424	37.8591	37.0867	37.8174	38.4037	49.5333	46.1194	41.3508	-6.47551	1049726	173497	6647	1229870	12	0.0127	0.141	11	-0.00135	0.854	22	-0.118	0.0054	2	0.662	0.69304	0.0759	1	-0.0544	-0.02365	0.924
rs41885943	18	43854199	PEPD	Cow conception rate (CCR)	d	4.32568	66.9348	11.8314	11.9317	10.6688	11.9817	11.3567	2.08045	12.7339	11.6288	1.44138	-10.74	783508	136125	5452	925085	12	0.588	0.147	11	-0.0504	0.847	22	-7.43	0.00589	1	0.1	0.12784	0.921	2	-1.16	-1.1351	0.0795
rs41885943	18	43854199	PEPD	Daughter pregnancy rate (DPR)	d	2.64437	56.0873	8.21811	8.29577	7.30569	8.34348	7.73842	1.84463	8.39205	7.55825	1.20279	-6.77236	936516	160350	6353	1103219	12	0.355	0.145	11	-0.0299	0.849	22	-4.55	0.00576	1	0.0777	0.096166	0.922	2	-0.912	-0.893906	0.0784
rs41885943	18	43854199	PEPD	Age at first calving (AFC)	d	0.619316	0.8838	12.8367	12.8684	12.4762	12.8929	12.5917	11.052	14.2285	13.4525	11.1818	-2.65872	821799	145398	5899	973096	12	0.0839	0.149	11	-0.00721	0.845	22	-1.06	0.00606	1	0.0317	0.05679	0.919	2	-0.361	-0.33541	0.0808
rs41885943	18	43854199	PEPD	Fat yield (FY)	d	0.710161	1.89	44.0654	44.0194	44.6109	43.9648	44.6636	43.9421	61.6097	57.2425	49.9805	-9.44558	1045580	177282	6983	1229845	12	0.0987	0.144	11	-0.00862	0.85	22	-1.21	0.00568	2	0.545	0.627	0.0778	1	-0.046	0.03552	0.922
rs41885943	18	43854199	PEPD	Heifer conception rate (HCR)	d	0.446072	0.7142	14.6854	14.702	14.4831	14.7139	14.5571	13.5082	15.4563	15.132	13.6484	-1.64571	917675	151221	5744	1074640	12	0.0575	0.141	11	-0.00464	0.854	22	-0.773	0.00535	1	0.0166	0.0438	0.924	2	-0.202	-0.17515	0.0757
rs41885943	18	43854199	PEPD	Milk yield (MY)	d	11.2886	0.7799	1311.05	1308.64	1339.71	1306.08	1338.96	1349.27	1605.83	1562.23	1458.27	-125.759	1063910	180025	7079	1251014	12	1.66	0.144	11	-0.154	0.85	22	-19.1	0.00566	2	28.7	30.1369	0.0776	1	-2.41	-0.9341	0.922
rs41885943	18	43854199	PEPD	Protein yield (PY)	d	0.104266	0.0828	37.1965	37.1452	37.8053	37.0922	37.7709	38.2411	49.5617	46.0456	41.1924	-6.61131	1045579	177282	6983	1229844	12	0.017	0.144	11	-0.00173	0.85	22	-0.173	0.00568	2	0.609	0.63915	0.0778	1	-0.0513	-0.02089	0.922
rs133443778	18	43887966	PEPD	Cow conception rate (CCR)	d	4.31632	59.3203	11.8586	11.9555	10.7174	12.0037	11.3905	2.14473	12.7522	11.6403	1.4749	-10.7214	720055	123001	4829	847885	12	0.576	0.145	11	-0.0486	0.849	22	-7.43	0.0057	1	0.0969	0.15157	0.922	2	-1.14	-1.08648	0.0782
rs133443778	18	43887966	PEPD	Daughter pregnancy rate (DPR)	d	2.67912	51.301	8.23316	8.30769	7.34171	8.35292	7.76989	1.82862	8.3869	7.56486	1.13926	-6.83662	862330	145055	5633	1013018	12	0.354	0.143	11	-0.0293	0.851	22	-4.62	0.00556	1	0.0745	0.108091	0.923	2	-0.891	-0.857891	0.0772
rs133443778	18	43887966	PEPD	Age at first calving (AFC)	d	0.52003	0.5542	12.8633	12.8966	12.4779	12.9242	12.5799	11.1956	14.2714	13.4359	11.2959	-2.55768	754624	131277	5218	891119	12	0.0687	0.147	11	-0.00574	0.847	22	-0.897	0.00586	1	0.0333	0.08503	0.92	2	-0.385	-0.33365	0.0795
rs133443778	18	43887966	PEPD	Fat yield (FY)	d	0.70588	1.6697	44.1323	44.0834	44.7225	44.0262	44.7704	44.1029	62.0199	57.6623	50.4175	-9.42358	963292	160514	6205	1130011	12	0.0968	0.142	11	-0.00834	0.852	22	-1.21	0.00549	2	0.59	0.73862	0.0765	1	-0.0489	0.09949	0.923
rs133443778	18	43887966	PEPD	Heifer conception rate (HCR)	d	0.420153	0.565	14.6908	14.7076	14.4819	14.7203	14.5518	13.5429	15.4703	15.136	13.7041	-1.59901	845406	136840	5093	987339	12	0.0531	0.139	11	-0.00419	0.856	22	-0.73	0.00516	1	0.0168	0.04944	0.926	2	-0.209	-0.17634	0.0745
rs133443778	18	43887966	PEPD	Milk yield (MY)	d	14.2002	1.0969	1312.04	1309.57	1341.91	1306.92	1341.47	1347.62	1611.87	1568.86	1460.33	-130.029	980095	162973	6293	1149361	12	2.03	0.142	11	-0.182	0.853	22	-24.2	0.00548	2	29.9	32.3349	0.0764	1	-2.47	-0.0051	0.924
rs133443778	18	43887966	PEPD	Protein yield (PY)	d	0.129007	0.1126	37.232	37.1798	37.8621	37.1256	37.8301	38.2765	49.8251	46.2675	41.3656	-6.6807	963291	160514	6205	1130010	12	0.0202	0.142	11	-0.00197	0.852	22	-0.216	0.00549	2	0.63	0.696	0.0765	1	-0.0522	0.0137	0.923
rs43746558	18	44167440	CHST8	Cow conception rate (CCR)	d	4.60729	65.1458	11.8562	11.9543	10.6582	12.0033	11.3592	1.50046	12.7565	11.586	0.766538	-11.4047	736729	121323	4643	862695	12	0.603	0.141	11	-0.0491	0.854	22	-7.96	0.00538	1	0.0981	0.1504	0.924	2	-1.2	-1.14566	0.0757
rs43746558	18	44167440	CHST8	Daughter pregnancy rate (DPR)	d	2.83548	55.3582	8.23243	8.30802	7.2964	8.35426	7.73842	1.45162	8.39548	7.51073	0.718434	-7.23467	881524	143125	5412	1030061	12	0.366	0.139	11	-0.0294	0.856	22	-4.91	0.00525	1	0.0756	0.108424	0.925	2	-0.936	-0.903197	0.0747
rs43746558	18	44167440	CHST8	Age at first calving (AFC)	d	0.580961	0.6672	12.8644	12.897	12.4726	12.9235	12.5809	11.0764	14.2765	13.4148	11.1047	-2.74098	772035	129360	5021	906416	12	0.0757	0.143	11	-0.00616	0.852	22	-1	0.00554	1	0.0326	0.08544	0.923	2	-0.392	-0.33903	0.0769
rs43746558	18	44167440	CHST8	Fat yield (FY)	d	0.686549	1.5226	44.1175	44.0684	44.7304	44.0117	44.7732	44.1615	61.9265	57.6511	50.0521	-9.73676	984635	158480	5953	1149068	12	0.0918	0.138	11	-0.00763	0.857	22	-1.18	0.00518	2	0.613	0.74651	0.0741	1	-0.0491	0.08447	0.926
rs43746558	18	44167440	CHST8	Heifer conception rate (HCR)	d	0.461271	0.6565	14.6898	14.7051	14.4934	14.716	14.5658	13.4932	15.4666	15.1475	13.6051	-1.70193	864608	135422	4900	1004930	12	0.0571	0.135	11	-0.00439	0.86	22	-0.804	0.00488	1	0.0153	0.04687	0.928	2	-0.196	-0.16475	0.0723
rs43746558	18	44167440	CHST8	Milk yield (MY)	d	12.3452	0.8016	1311.82	1309.3	1343.35	1306.62	1342.56	1353.81	1610.78	1571.2	1463.84	-127.151	1001844	160906	6035	1168785	12	1.73	0.138	11	-0.152	0.857	22	-21.1	0.00516	2	31.5	33.7739	0.074	1	-2.52	-0.2801	0.926
rs43746558	18	44167440	CHST8	Protein yield (PY)	d	0.0919009	0.0556	37.2245	37.1712	37.8902	37.1164	37.8517	38.4032	49.7684	46.3153	41.3725	-6.66932	984634	158480	5953	1149067	12	0.0148	0.138	11	-0.00145	0.857	22	-0.153	0.00518	2	0.666	0.72412	0.0741	1	-0.0533	0.00508	0.926
mu is genotypic mean of the SNP
u1 is the allelic mean of allele 1. u2 is the allelic mean of allele 2.
g11, g12 and g22 are the genotypic mean for '11', '12' and '22' SNP genotypes of the corrected phenotypic values after removing 2(PTA), Equations 1 and 4.
y11, y12 and y22 are the genotypic mean for '11', '12' and '22' SNP genotypes of the originalhenotypic values without removing 2(PTA).
NI is 'negative impact' calculated as the difference between phenotypic mean of the homozygous recessive genotype and the phenotypic mean of the other two genotypes withput removing 2(PTA).
n11, n12 and n22 are the number of cows with '11', '12' and '22' SNP genotypes respectively. Yellow highlighted numbers are those of the recessive genotypes.
‘effect’ is the dominance effect of the SNP as the difference between the heterozygous dominance value and the average of the two homozygous dominance values (Equation 12).
‘d_DR’ is the dominance value of the heterozygous genotype with one dominant allele (D) and one recessive allele (R) (Equation 13).
‘DR’ is the heterozygous genotype with one dominant allele and one recessive allele.
‘d_DR’ is the dominance value of the heterozygous genotype with one dominant allele (D) and one recessive allele (R) (Equation 13).
‘DD’ is the homozygous genotype with two dominant alleles.
‘d_DD’ is the dominance value of the homozygous genotype with two dominant alleles (DD) (Equation 13).
‘RR’ is the homozygous genotype with two recessive alleles.
‘d_RR’ is the dominance value of the homozygous genotype with two recessive alleles (RR) (Equation 13).
‘f_DR’ is the frequency of the heterozygous genotype.
‘f_DD’ is the frequency of the homozygous genotype of the dominant allele.
‘f_RR’ is the frequency of the homozygous genotype of the recessive allele. ‘f_R’ is the frequency of the recessive allele.
‘ae+’ is the allelic effect of the positive allele using Equation 9.
‘ae-’ is the allelic effect of the negative allele using Equation 9.
‘f_al+’ is the frequency of the positive allele. ‘f_al-’ is the requency of the negative allele.
