# Supplementary material for: A Million-Cow Genome-Wide Association Study of Three Fertility Traits in U.S. Holstein Cows
Source: Int J Mol Sci. 2023 Jun 22;24(13):10496. doi: 10.3390/ijms241310496 (PMC10341978; doi:10.3390/ijms241310496)
Supplement: Supplementary file 1 [file ijms-24-10496-s001.zip › Supplementary_materials/Table_S9.xlsx]

## Sheet: s9
GO.ID	Description of GO ID	Gene count	All..17045.	pvalue	Ensembl ID	gene_name
GO:0031146	SCF-dependent proteasomal ubiquitin-dependent protein catabolic process	1	46	0.0292973	ENSBTAG00000014156	AMN1
GO:0043161	proteasome-mediated ubiquitin-dependent protein catabolic process	1	355	0.206727	ENSBTAG00000014156	AMN1
GO:0010498	proteasomal protein catabolic process	1	390	0.22484	ENSBTAG00000014156	AMN1
GO:0006511	ubiquitin-dependent protein catabolic process	1	542	0.299225	ENSBTAG00000014156	AMN1
GO:0019941	modification-dependent protein catabolic process	1	553	0.304347	ENSBTAG00000014156	AMN1
GO:0043632	modification-dependent macromolecule catabolic process	1	558	0.306664	ENSBTAG00000014156	AMN1
GO:0051603	proteolysis involved in cellular protein catabolic process	1	625	0.337045	ENSBTAG00000014156	AMN1
GO:0044257	cellular protein catabolic process	1	650	0.348067	ENSBTAG00000014156	AMN1
GO:0030163	protein catabolic process	1	780	0.402744	ENSBTAG00000014156	AMN1
GO:0044265	cellular macromolecule catabolic process	1	819	0.418314	ENSBTAG00000014156	AMN1
GO:0009057	macromolecule catabolic process	1	982	0.479476	ENSBTAG00000014156	AMN1
GO:0006508	proteolysis	2	1557	0.265807	ENSBTAG00000014156;ENSBTAG00000031941	AMN1;PEPD
GO:0042446	hormone biosynthetic process	1	38	0.0242588	ENSBTAG00000047670	CHST8
GO:0030166	proteoglycan biosynthetic process	1	47	0.0299254	ENSBTAG00000047670	CHST8
GO:0006029	proteoglycan metabolic process	1	66	0.04179	ENSBTAG00000047670	CHST8
GO:0016051	carbohydrate biosynthetic process	1	137	0.0849682	ENSBTAG00000047670	CHST8
GO:0042445	hormone metabolic process	1	144	0.0891279	ENSBTAG00000047670	CHST8
GO:0006790	sulfur compound metabolic process	1	242	0.145587	ENSBTAG00000047670	CHST8
GO:0009101	glycoprotein biosynthetic process	1	288	0.170975	ENSBTAG00000047670	CHST8
GO:0010817	regulation of hormone levels	1	317	0.186625	ENSBTAG00000047670	CHST8
GO:0009100	glycoprotein metabolic process	1	335	0.196204	ENSBTAG00000047670	CHST8
GO:0030262	apoptotic nuclear changes	1	19	0.0121971	ENSBTAG00000005761	DEDD2
GO:0006921	cellular component disassembly involved in execution phase of apoptosis	1	20	0.0128353	ENSBTAG00000005761	DEDD2
GO:2001238	positive regulation of extrinsic apoptotic signaling pathway	1	40	0.0255207	ENSBTAG00000005761	DEDD2
GO:0008625	extrinsic apoptotic signaling pathway via death domain receptors	1	54	0.034312	ENSBTAG00000005761	DEDD2
GO:0097194	execution phase of apoptosis	1	58	0.0368106	ENSBTAG00000005761	DEDD2
GO:2001236	regulation of extrinsic apoptotic signaling pathway	1	111	0.0693661	ENSBTAG00000005761	DEDD2
GO:2001235	positive regulation of apoptotic signaling pathway	1	118	0.0735903	ENSBTAG00000005761	DEDD2
GO:0097191	extrinsic apoptotic signaling pathway	1	169	0.103844	ENSBTAG00000005761	DEDD2
GO:0022411	cellular component disassembly	1	258	0.154497	ENSBTAG00000005761	DEDD2
GO:2001233	regulation of apoptotic signaling pathway	1	283	0.168249	ENSBTAG00000005761	DEDD2
GO:0043065	positive regulation of apoptotic process	1	378	0.218673	ENSBTAG00000005761	DEDD2
GO:0043068	positive regulation of programmed cell death	1	383	0.221248	ENSBTAG00000005761	DEDD2
GO:0010942	positive regulation of cell death	1	411	0.235527	ENSBTAG00000005761	DEDD2
GO:0097190	apoptotic signaling pathway	1	431	0.245581	ENSBTAG00000005761	DEDD2
GO:0042981	regulation of apoptotic process	1	1008	0.488672	ENSBTAG00000005761	DEDD2
GO:0043067	regulation of programmed cell death	1	1026	0.494952	ENSBTAG00000005761	DEDD2
GO:0010941	regulation of cell death	1	1106	0.522023	ENSBTAG00000005761	DEDD2
GO:0009967	positive regulation of signal transduction	1	1141	0.533445	ENSBTAG00000005761	DEDD2
GO:0006915	apoptotic process	1	1210	0.555241	ENSBTAG00000005761	DEDD2
GO:0012501	programmed cell death	1	1246	0.566242	ENSBTAG00000005761	DEDD2
GO:0023056	positive regulation of signaling	1	1260	0.570452	ENSBTAG00000005761	DEDD2
GO:0010647	positive regulation of cell communication	1	1285	0.577879	ENSBTAG00000005761	DEDD2
GO:0008219	cell death	1	1338	0.593239	ENSBTAG00000005761	DEDD2
GO:0016265	death	1	1338	0.593239	ENSBTAG00000005761	DEDD2
GO:0048584	positive regulation of response to stimulus	1	1644	0.672417	ENSBTAG00000005761	DEDD2
GO:0007166	cell surface receptor signaling pathway	1	2074	0.760118	ENSBTAG00000005761	DEDD2
GO:0007165	signal transduction	4	5307	0.463734	ENSBTAG00000005761;ENSBTAG00000009070;ENSBTAG00000013958;ENSBTAG00000018225	DEDD2;NPFFR2;PAK4;SIPA1L3
GO:0044700	single organism signaling	4	5629	0.518608	ENSBTAG00000005761;ENSBTAG00000009070;ENSBTAG00000013958;ENSBTAG00000018225	DEDD2;NPFFR2;PAK4;SIPA1L3
GO:0023052	signaling	4	5640	0.520462	ENSBTAG00000005761;ENSBTAG00000009070;ENSBTAG00000013958;ENSBTAG00000018225	DEDD2;NPFFR2;PAK4;SIPA1L3
GO:0007154	cell communication	4	5716	0.533228	ENSBTAG00000005761;ENSBTAG00000009070;ENSBTAG00000013958;ENSBTAG00000018225	DEDD2;NPFFR2;PAK4;SIPA1L3
GO:0051716	cellular response to stimulus	4	6476	0.654415	ENSBTAG00000005761;ENSBTAG00000009070;ENSBTAG00000013958;ENSBTAG00000018225	DEDD2;NPFFR2;PAK4;SIPA1L3
GO:0009966	regulation of signal transduction	3	2177	0.156942	ENSBTAG00000005761;ENSBTAG00000009070;ENSBTAG00000018225	DEDD2;NPFFR2;SIPA1L3
GO:0023051	regulation of signaling	3	2460	0.204113	ENSBTAG00000005761;ENSBTAG00000009070;ENSBTAG00000018225	DEDD2;NPFFR2;SIPA1L3
GO:0010646	regulation of cell communication	3	2489	0.209175	ENSBTAG00000005761;ENSBTAG00000009070;ENSBTAG00000018225	DEDD2;NPFFR2;SIPA1L3
GO:0048583	regulation of response to stimulus	3	2924	0.288887	ENSBTAG00000005761;ENSBTAG00000009070;ENSBTAG00000018225	DEDD2;NPFFR2;SIPA1L3
GO:0016043	cellular component organization	3	5219	0.702997	ENSBTAG00000005761;ENSBTAG00000013958;ENSBTAG00000018225	DEDD2;PAK4;SIPA1L3
GO:0071840	cellular component organization or biogenesis	3	5390	0.727367	ENSBTAG00000005761;ENSBTAG00000013958;ENSBTAG00000018225	DEDD2;PAK4;SIPA1L3
GO:0050896	response to stimulus	5	7535	0.581929	ENSBTAG00000005761;ENSBTAG00000008556;ENSBTAG00000009070;ENSBTAG00000013958;ENSBTAG00000018225	DEDD2;POU2F2;NPFFR2;PAK4;SIPA1L3
GO:0035461	vitamin transmembrane transport	1	8	0.00515221	ENSBTAG00000013718	GC
GO:0042359	vitamin D metabolic process	1	13	0.00836008	ENSBTAG00000013718	GC
GO:0006775	fat-soluble vitamin metabolic process	1	25	0.0160206	ENSBTAG00000013718	GC
GO:0051180	vitamin transport	1	33	0.0210977	ENSBTAG00000013718	GC
GO:0006766	vitamin metabolic process	1	49	0.0311806	ENSBTAG00000013718	GC
GO:0008202	steroid metabolic process	1	199	0.121218	ENSBTAG00000013718	GC
GO:0006066	alcohol metabolic process	1	273	0.162772	ENSBTAG00000013718	GC
GO:1901615	organic hydroxy compound metabolic process	1	380	0.219704	ENSBTAG00000013718	GC
GO:0006629	lipid metabolic process	1	1062	0.507302	ENSBTAG00000013718	GC
GO:0098609	cell-cell adhesion	1	748	0.389687	ENSBTAG00000002029	IGSF5
GO:0007155	cell adhesion	1	1136	0.531829	ENSBTAG00000002029	IGSF5
GO:0022610	biological adhesion	1	1141	0.533445	ENSBTAG00000002029	IGSF5
GO:0008150	biological_process	11	17045	1	ENSBTAG00000002029;ENSBTAG00000002348;ENSBTAG00000005761;ENSBTAG00000008556;ENSBTAG00000009070;ENSBTAG00000013718;ENSBTAG00000013958;ENSBTAG00000014156;ENSBTAG00000018225;ENSBTAG00000031941;ENSBTAG00000047670	IGSF5;SLC4A4;DEDD2;POU2F2;NPFFR2;GC;PAK4;AMN1;SIPA1L3;PEPD;CHST8
GO:2000479	regulation of cAMP-dependent protein kinase activity	1	16	0.0102803	ENSBTAG00000009070	NPFFR2
GO:0030814	regulation of cAMP metabolic process	1	24	0.0153843	ENSBTAG00000009070	NPFFR2
GO:0030817	regulation of cAMP biosynthetic process	1	24	0.0153843	ENSBTAG00000009070	NPFFR2
GO:0045761	regulation of adenylate cyclase activity	1	24	0.0153843	ENSBTAG00000009070	NPFFR2
GO:0030799	regulation of cyclic nucleotide metabolic process	1	32	0.0204644	ENSBTAG00000009070	NPFFR2
GO:0030802	regulation of cyclic nucleotide biosynthetic process	1	32	0.0204644	ENSBTAG00000009070	NPFFR2
GO:0006171	cAMP biosynthetic process	1	33	0.0210977	ENSBTAG00000009070	NPFFR2
GO:0031279	regulation of cyclase activity	1	35	0.0223633	ENSBTAG00000009070	NPFFR2
GO:0051339	regulation of lyase activity	1	37	0.0236273	ENSBTAG00000009070	NPFFR2
GO:0030808	regulation of nucleotide biosynthetic process	1	41	0.026151	ENSBTAG00000009070	NPFFR2
GO:0046058	cAMP metabolic process	1	41	0.026151	ENSBTAG00000009070	NPFFR2
GO:1900371	regulation of purine nucleotide biosynthetic process	1	41	0.026151	ENSBTAG00000009070	NPFFR2
GO:0052652	cyclic purine nucleotide metabolic process	1	52	0.0330605	ENSBTAG00000009070	NPFFR2
GO:0009190	cyclic nucleotide biosynthetic process	1	55	0.0349372	ENSBTAG00000009070	NPFFR2
GO:0007218	neuropeptide signaling pathway	1	66	0.04179	ENSBTAG00000009070	NPFFR2
GO:0009187	cyclic nucleotide metabolic process	1	67	0.0424108	ENSBTAG00000009070	NPFFR2
GO:0009152	purine ribonucleotide biosynthetic process	1	141	0.0873472	ENSBTAG00000009070	NPFFR2
GO:0006164	purine nucleotide biosynthetic process	1	145	0.0897207	ENSBTAG00000009070	NPFFR2
GO:0009260	ribonucleotide biosynthetic process	1	152	0.0938608	ENSBTAG00000009070	NPFFR2
GO:0046390	ribose phosphate biosynthetic process	1	156	0.0962188	ENSBTAG00000009070	NPFFR2
GO:0072522	purine-containing compound biosynthetic process	1	157	0.0968075	ENSBTAG00000009070	NPFFR2
GO:0009165	nucleotide biosynthetic process	1	198	0.120644	ENSBTAG00000009070	NPFFR2
GO:1901293	nucleoside phosphate biosynthetic process	1	202	0.122938	ENSBTAG00000009070	NPFFR2
GO:0071900	regulation of protein serine/threonine kinase activity	1	359	0.208816	ENSBTAG00000009070	NPFFR2
GO:0090407	organophosphate biosynthetic process	1	375	0.217124	ENSBTAG00000009070	NPFFR2
GO:0043408	regulation of MAPK cascade	1	513	0.285555	ENSBTAG00000009070	NPFFR2
GO:0000165	MAPK cascade	1	559	0.307127	ENSBTAG00000009070	NPFFR2
GO:0023014	signal transduction by protein phosphorylation	1	559	0.307127	ENSBTAG00000009070	NPFFR2
GO:1901566	organonitrogen compound biosynthetic process	1	1172	0.543355	ENSBTAG00000009070	NPFFR2
GO:0007186	G-protein coupled receptor signaling pathway	1	1761	0.698784	ENSBTAG00000009070	NPFFR2
GO:1901137	carbohydrate derivative biosynthetic process	2	550	0.0471373	ENSBTAG00000009070;ENSBTAG00000047670	NPFFR2;CHST8
GO:0044711	single-organism biosynthetic process	2	1168	0.171301	ENSBTAG00000009070;ENSBTAG00000047670	NPFFR2;CHST8
GO:0045859	regulation of protein kinase activity	2	552	0.0474477	ENSBTAG00000009070;ENSBTAG00000013958	NPFFR2;PAK4
GO:0043549	regulation of kinase activity	2	637	0.0613398	ENSBTAG00000009070;ENSBTAG00000013958	NPFFR2;PAK4
GO:0051338	regulation of transferase activity	2	734	0.0787305	ENSBTAG00000009070;ENSBTAG00000013958	NPFFR2;PAK4
GO:0001932	regulation of protein phosphorylation	2	1086	0.152396	ENSBTAG00000009070;ENSBTAG00000013958	NPFFR2;PAK4
GO:0031399	regulation of protein modification process	2	1497	0.250899	ENSBTAG00000009070;ENSBTAG00000013958	NPFFR2;PAK4
GO:0006468	protein phosphorylation	2	1522	0.257102	ENSBTAG00000009070;ENSBTAG00000013958	NPFFR2;PAK4
GO:0032268	regulation of cellular protein metabolic process	2	2094	0.399204	ENSBTAG00000009070;ENSBTAG00000013958	NPFFR2;PAK4
GO:0051246	regulation of protein metabolic process	2	2232	0.432527	ENSBTAG00000009070;ENSBTAG00000013958	NPFFR2;PAK4
GO:0006464	cellular protein modification process	2	3370	0.671159	ENSBTAG00000009070;ENSBTAG00000013958	NPFFR2;PAK4
GO:0036211	protein modification process	2	3370	0.671159	ENSBTAG00000009070;ENSBTAG00000013958	NPFFR2;PAK4
GO:0043412	macromolecule modification	2	3525	0.697634	ENSBTAG00000009070;ENSBTAG00000013958	NPFFR2;PAK4
GO:0044267	cellular protein metabolic process	3	4427	0.574562	ENSBTAG00000009070;ENSBTAG00000013958;ENSBTAG00000014156	NPFFR2;PAK4;AMN1
GO:0019538	protein metabolic process	5	5079	0.205805	ENSBTAG00000009070;ENSBTAG00000013958;ENSBTAG00000014156;ENSBTAG00000031941;ENSBTAG00000047670	NPFFR2;PAK4;AMN1;PEPD;CHST8
GO:0050790	regulation of catalytic activity	3	1812	0.103401	ENSBTAG00000009070;ENSBTAG00000013958;ENSBTAG00000018225	NPFFR2;PAK4;SIPA1L3
GO:0035556	intracellular signal transduction	3	1919	0.118125	ENSBTAG00000009070;ENSBTAG00000013958;ENSBTAG00000018225	NPFFR2;PAK4;SIPA1L3
GO:0065009	regulation of molecular function	3	2288	0.17493	ENSBTAG00000009070;ENSBTAG00000013958;ENSBTAG00000018225	NPFFR2;PAK4;SIPA1L3
GO:1902531	regulation of intracellular signal transduction	2	1292	0.200726	ENSBTAG00000009070;ENSBTAG00000018225	NPFFR2;SIPA1L3
GO:0060996	dendritic spine development	1	53	0.0336865	ENSBTAG00000013958	PAK4
GO:0016358	dendrite development	1	142	0.0879411	ENSBTAG00000013958	PAK4
GO:0031098	stress-activated protein kinase signaling cascade	1	195	0.118919	ENSBTAG00000013958	PAK4
GO:0032147	activation of protein kinase activity	1	196	0.119495	ENSBTAG00000013958	PAK4
GO:0071407	cellular response to organic cyclic compound	1	345	0.201481	ENSBTAG00000013958	PAK4
GO:0045860	positive regulation of protein kinase activity	1	347	0.202533	ENSBTAG00000013958	PAK4
GO:0033674	positive regulation of kinase activity	1	408	0.234009	ENSBTAG00000013958	PAK4
GO:0051347	positive regulation of transferase activity	1	464	0.261906	ENSBTAG00000013958	PAK4
GO:0014070	response to organic cyclic compound	1	471	0.265328	ENSBTAG00000013958	PAK4
GO:0031175	neuron projection development	1	624	0.3366	ENSBTAG00000013958	PAK4
GO:0001934	positive regulation of protein phosphorylation	1	745	0.388449	ENSBTAG00000013958	PAK4
GO:0048666	neuron development	1	769	0.398285	ENSBTAG00000013958	PAK4
GO:0031401	positive regulation of protein modification process	1	933	0.461735	ENSBTAG00000013958	PAK4
GO:0030182	neuron differentiation	1	956	0.47013	ENSBTAG00000013958	PAK4
GO:0048699	generation of neurons	1	1081	0.513708	ENSBTAG00000013958	PAK4
GO:0030030	cell projection organization	1	1095	0.51838	ENSBTAG00000013958	PAK4
GO:0022008	neurogenesis	1	1166	0.541452	ENSBTAG00000013958	PAK4
GO:0032270	positive regulation of cellular protein metabolic process	1	1192	0.549646	ENSBTAG00000013958	PAK4
GO:0051247	positive regulation of protein metabolic process	1	1262	0.571051	ENSBTAG00000013958	PAK4
GO:0033554	cellular response to stress	1	1424	0.617085	ENSBTAG00000013958	PAK4
GO:0007399	nervous system development	1	1580	0.657123	ENSBTAG00000013958	PAK4
GO:0071310	cellular response to organic substance	1	1667	0.67776	ENSBTAG00000013958	PAK4
GO:0010033	response to organic substance	1	2013	0.749141	ENSBTAG00000013958	PAK4
GO:0070887	cellular response to chemical stimulus	1	2063	0.758171	ENSBTAG00000013958	PAK4
GO:0006950	response to stress	1	2706	0.850763	ENSBTAG00000013958	PAK4
GO:0042221	response to chemical	1	3751	0.935099	ENSBTAG00000013958	PAK4
GO:0043085	positive regulation of catalytic activity	2	963	0.125094	ENSBTAG00000013958;ENSBTAG00000018225	PAK4;SIPA1L3
GO:0044093	positive regulation of molecular function	2	1220	0.183531	ENSBTAG00000013958;ENSBTAG00000018225	PAK4;SIPA1L3
GO:0002335	mature B cell differentiation	1	24	0.0153843	ENSBTAG00000008556	POU2F2
GO:0098586	cellular response to virus	1	48	0.0305532	ENSBTAG00000008556	POU2F2
GO:0032755	positive regulation of interleukin-6 production	1	66	0.04179	ENSBTAG00000008556	POU2F2
GO:0032635	interleukin-6 production	1	98	0.0614748	ENSBTAG00000008556	POU2F2
GO:0032675	regulation of interleukin-6 production	1	98	0.0614748	ENSBTAG00000008556	POU2F2
GO:0030183	B cell differentiation	1	112	0.0699706	ENSBTAG00000008556	POU2F2
GO:0048469	cell maturation	1	128	0.0795946	ENSBTAG00000008556	POU2F2
GO:0021700	developmental maturation	1	204	0.124084	ENSBTAG00000008556	POU2F2
GO:0042113	B cell activation	1	223	0.134896	ENSBTAG00000008556	POU2F2
GO:0009615	response to virus	1	251	0.150609	ENSBTAG00000008556	POU2F2
GO:0030098	lymphocyte differentiation	1	294	0.174235	ENSBTAG00000008556	POU2F2
GO:0001819	positive regulation of cytokine production	1	331	0.194084	ENSBTAG00000008556	POU2F2
GO:0002521	leukocyte differentiation	1	416	0.238052	ENSBTAG00000008556	POU2F2
GO:0001817	regulation of cytokine production	1	508	0.283174	ENSBTAG00000008556	POU2F2
GO:0001816	cytokine production	1	514	0.28603	ENSBTAG00000008556	POU2F2
GO:0046649	lymphocyte activation	1	542	0.299225	ENSBTAG00000008556	POU2F2
GO:0045321	leukocyte activation	1	641	0.344118	ENSBTAG00000008556	POU2F2
GO:0051707	response to other organism	1	711	0.374266	ENSBTAG00000008556	POU2F2
GO:0043207	response to external biotic stimulus	1	712	0.374687	ENSBTAG00000008556	POU2F2
GO:0001775	cell activation	1	718	0.37721	ENSBTAG00000008556	POU2F2
GO:0009607	response to biotic stimulus	1	742	0.38721	ENSBTAG00000008556	POU2F2
GO:0045944	positive regulation of transcription from RNA polymerase II promoter	1	1016	0.491472	ENSBTAG00000008556	POU2F2
GO:0051240	positive regulation of multicellular organismal process	1	1198	0.551518	ENSBTAG00000008556	POU2F2
GO:1903508	positive regulation of nucleic acid-templated transcription	1	1409	0.61302	ENSBTAG00000008556	POU2F2
GO:1902680	positive regulation of RNA biosynthetic process	1	1413	0.614108	ENSBTAG00000008556	POU2F2
GO:0051254	positive regulation of RNA metabolic process	1	1468	0.628787	ENSBTAG00000008556	POU2F2
GO:0051704	multi-organism process	1	1513	0.640418	ENSBTAG00000008556	POU2F2
GO:0010557	positive regulation of macromolecule biosynthetic process	1	1568	0.654184	ENSBTAG00000008556	POU2F2
GO:0031328	positive regulation of cellular biosynthetic process	1	1634	0.670069	ENSBTAG00000008556	POU2F2
GO:0009891	positive regulation of biosynthetic process	1	1651	0.674052	ENSBTAG00000008556	POU2F2
GO:0010628	positive regulation of gene expression	1	1728	0.691549	ENSBTAG00000008556	POU2F2
GO:0009605	response to external stimulus	1	1734	0.692876	ENSBTAG00000008556	POU2F2
GO:0006357	regulation of transcription from RNA polymerase II promoter	1	2118	0.767763	ENSBTAG00000008556	POU2F2
GO:0051239	regulation of multicellular organismal process	1	2160	0.774853	ENSBTAG00000008556	POU2F2
GO:0006366	transcription from RNA polymerase II promoter	1	2191	0.779959	ENSBTAG00000008556	POU2F2
GO:1903506	regulation of nucleic acid-templated transcription	1	2845	0.865932	ENSBTAG00000008556	POU2F2
GO:2001141	regulation of RNA biosynthetic process	1	2851	0.866554	ENSBTAG00000008556	POU2F2
GO:0097659	nucleic acid-templated transcription	1	2973	0.878647	ENSBTAG00000008556	POU2F2
GO:0032774	RNA biosynthetic process	1	2990	0.88025	ENSBTAG00000008556	POU2F2
GO:0051252	regulation of RNA metabolic process	1	3001	0.881278	ENSBTAG00000008556	POU2F2
GO:2000112	regulation of cellular macromolecule biosynthetic process	1	3190	0.897722	ENSBTAG00000008556	POU2F2
GO:0010556	regulation of macromolecule biosynthetic process	1	3213	0.899575	ENSBTAG00000008556	POU2F2
GO:0010468	regulation of gene expression	1	3559	0.924006	ENSBTAG00000008556	POU2F2
GO:0016070	RNA metabolic process	1	3824	0.938915	ENSBTAG00000008556	POU2F2
GO:0090304	nucleic acid metabolic process	1	4274	0.958271	ENSBTAG00000008556	POU2F2
GO:0010467	gene expression	1	4740	0.97228	ENSBTAG00000008556	POU2F2
GO:0034645	cellular macromolecule biosynthetic process	2	4171	0.791828	ENSBTAG00000008556;ENSBTAG00000047670	POU2F2;CHST8
GO:0009059	macromolecule biosynthetic process	2	4208	0.796462	ENSBTAG00000008556;ENSBTAG00000047670	POU2F2;CHST8
GO:0034654	nucleobase-containing compound biosynthetic process	2	3270	0.653268	ENSBTAG00000008556;ENSBTAG00000009070	POU2F2;NPFFR2
GO:0031326	regulation of cellular biosynthetic process	2	3323	0.662829	ENSBTAG00000008556;ENSBTAG00000009070	POU2F2;NPFFR2
GO:0018130	heterocycle biosynthetic process	2	3333	0.664613	ENSBTAG00000008556;ENSBTAG00000009070	POU2F2;NPFFR2
GO:0019438	aromatic compound biosynthetic process	2	3339	0.665681	ENSBTAG00000008556;ENSBTAG00000009070	POU2F2;NPFFR2
GO:0009889	regulation of biosynthetic process	2	3364	0.670103	ENSBTAG00000008556;ENSBTAG00000009070	POU2F2;NPFFR2
GO:1901362	organic cyclic compound biosynthetic process	2	3421	0.680039	ENSBTAG00000008556;ENSBTAG00000009070	POU2F2;NPFFR2
GO:0044271	cellular nitrogen compound biosynthetic process	2	4026	0.772895	ENSBTAG00000008556;ENSBTAG00000009070	POU2F2;NPFFR2
GO:0044249	cellular biosynthetic process	3	4892	0.652939	ENSBTAG00000008556;ENSBTAG00000009070;ENSBTAG00000047670	POU2F2;NPFFR2;CHST8
GO:1901576	organic substance biosynthetic process	3	4956	0.663084	ENSBTAG00000008556;ENSBTAG00000009070;ENSBTAG00000047670	POU2F2;NPFFR2;CHST8
GO:0009058	biosynthetic process	3	5038	0.675838	ENSBTAG00000008556;ENSBTAG00000009070;ENSBTAG00000047670	POU2F2;NPFFR2;CHST8
GO:0044260	cellular macromolecule metabolic process	5	7590	0.590494	ENSBTAG00000008556;ENSBTAG00000009070;ENSBTAG00000013958;ENSBTAG00000014156;ENSBTAG00000047670	POU2F2;NPFFR2;PAK4;AMN1;CHST8
GO:0010604	positive regulation of macromolecule metabolic process	2	2657	0.530088	ENSBTAG00000008556;ENSBTAG00000013958	POU2F2;PAK4
GO:0048468	cell development	3	1642	0.0818472	ENSBTAG00000008556;ENSBTAG00000013958;ENSBTAG00000018225	POU2F2;PAK4;SIPA1L3
GO:0030154	cell differentiation	3	2837	0.272474	ENSBTAG00000008556;ENSBTAG00000013958;ENSBTAG00000018225	POU2F2;PAK4;SIPA1L3
GO:0048869	cellular developmental process	3	3142	0.330685	ENSBTAG00000008556;ENSBTAG00000013958;ENSBTAG00000018225	POU2F2;PAK4;SIPA1L3
GO:0048731	system development	3	3331	0.367396	ENSBTAG00000008556;ENSBTAG00000013958;ENSBTAG00000018225	POU2F2;PAK4;SIPA1L3
GO:0007275	multicellular organism development	3	3643	0.428129	ENSBTAG00000008556;ENSBTAG00000013958;ENSBTAG00000018225	POU2F2;PAK4;SIPA1L3
GO:0048856	anatomical structure development	3	4126	0.520012	ENSBTAG00000008556;ENSBTAG00000013958;ENSBTAG00000018225	POU2F2;PAK4;SIPA1L3
GO:0044767	single-organism developmental process	3	4423	0.573855	ENSBTAG00000008556;ENSBTAG00000013958;ENSBTAG00000018225	POU2F2;PAK4;SIPA1L3
GO:0044707	single-multicellular organism process	3	4450	0.578618	ENSBTAG00000008556;ENSBTAG00000013958;ENSBTAG00000018225	POU2F2;PAK4;SIPA1L3
GO:0032502	developmental process	3	4473	0.582657	ENSBTAG00000008556;ENSBTAG00000013958;ENSBTAG00000018225	POU2F2;PAK4;SIPA1L3
GO:0032501	multicellular organismal process	3	5964	0.799758	ENSBTAG00000008556;ENSBTAG00000013958;ENSBTAG00000018225	POU2F2;PAK4;SIPA1L3
GO:0030097	hemopoiesis	2	636	0.0611687	ENSBTAG00000008556;ENSBTAG00000018225	POU2F2;SIPA1L3
GO:0048534	hematopoietic or lymphoid organ development	2	672	0.0674366	ENSBTAG00000008556;ENSBTAG00000018225	POU2F2;SIPA1L3
GO:0002520	immune system development	2	722	0.0764973	ENSBTAG00000008556;ENSBTAG00000018225	POU2F2;SIPA1L3
GO:0002376	immune system process	2	1905	0.352665	ENSBTAG00000008556;ENSBTAG00000018225	POU2F2;SIPA1L3
GO:0048513	animal organ development	2	2413	0.475116	ENSBTAG00000008556;ENSBTAG00000018225	POU2F2;SIPA1L3
GO:0090162	establishment of epithelial cell polarity	1	26	0.0166566	ENSBTAG00000018225	SIPA1L3
GO:0003382	epithelial cell morphogenesis	1	40	0.0255207	ENSBTAG00000018225	SIPA1L3
GO:0090630	activation of GTPase activity	1	83	0.0522938	ENSBTAG00000018225	SIPA1L3
GO:0030010	establishment of cell polarity	1	107	0.0669445	ENSBTAG00000018225	SIPA1L3
GO:0002244	hematopoietic progenitor cell differentiation	1	131	0.0813889	ENSBTAG00000018225	SIPA1L3
GO:0007163	establishment or maintenance of cell polarity	1	154	0.0950405	ENSBTAG00000018225	SIPA1L3
GO:0002064	epithelial cell development	1	181	0.110831	ENSBTAG00000018225	SIPA1L3
GO:0051056	regulation of small GTPase mediated signal transduction	1	185	0.113149	ENSBTAG00000018225	SIPA1L3
GO:0001654	eye development	1	288	0.170975	ENSBTAG00000018225	SIPA1L3
GO:0043547	positive regulation of GTPase activity	1	293	0.173692	ENSBTAG00000018225	SIPA1L3
GO:0043087	regulation of GTPase activity	1	350	0.204108	ENSBTAG00000018225	SIPA1L3
GO:0007264	small GTPase mediated signal transduction	1	357	0.207772	ENSBTAG00000018225	SIPA1L3
GO:0007423	sensory organ development	1	446	0.253042	ENSBTAG00000018225	SIPA1L3
GO:0030855	epithelial cell differentiation	1	461	0.260435	ENSBTAG00000018225	SIPA1L3
GO:0051345	positive regulation of hydrolase activity	1	516	0.28698	ENSBTAG00000018225	SIPA1L3
GO:0000904	cell morphogenesis involved in differentiation	1	621	0.335265	ENSBTAG00000018225	SIPA1L3
GO:0060429	epithelium development	1	865	0.436204	ENSBTAG00000018225	SIPA1L3
GO:0051336	regulation of hydrolase activity	1	942	0.465035	ENSBTAG00000018225	SIPA1L3
GO:0000902	cell morphogenesis	1	1095	0.51838	ENSBTAG00000018225	SIPA1L3
GO:0032989	cellular component morphogenesis	1	1166	0.541452	ENSBTAG00000018225	SIPA1L3
GO:0007010	cytoskeleton organization	1	1173	0.543672	ENSBTAG00000018225	SIPA1L3
GO:0009888	tissue development	1	1417	0.615193	ENSBTAG00000018225	SIPA1L3
GO:0009653	anatomical structure morphogenesis	1	2225	0.785438	ENSBTAG00000018225	SIPA1L3
GO:0006996	organelle organization	1	3210	0.899335	ENSBTAG00000018225	SIPA1L3
GO:0036376	sodium ion export from cell	1	11	0.00707806	ENSBTAG00000002348	SLC4A4
GO:0071436	sodium ion export	1	11	0.00707806	ENSBTAG00000002348	SLC4A4
GO:0045821	positive regulation of glycolytic process	1	12	0.00771926	ENSBTAG00000002348	SLC4A4
GO:0030813	positive regulation of nucleotide catabolic process	1	13	0.00836008	ENSBTAG00000002348	SLC4A4
GO:0051194	positive regulation of cofactor metabolic process	1	13	0.00836008	ENSBTAG00000002348	SLC4A4
GO:0051197	positive regulation of coenzyme metabolic process	1	13	0.00836008	ENSBTAG00000002348	SLC4A4
GO:0015701	bicarbonate transport	1	21	0.0134731	ENSBTAG00000002348	SLC4A4
GO:0045979	positive regulation of nucleoside metabolic process	1	23	0.0147476	ENSBTAG00000002348	SLC4A4
GO:1903580	positive regulation of ATP metabolic process	1	23	0.0147476	ENSBTAG00000002348	SLC4A4
GO:0006110	regulation of glycolytic process	1	34	0.0217307	ENSBTAG00000002348	SLC4A4
GO:0030811	regulation of nucleotide catabolic process	1	35	0.0223633	ENSBTAG00000002348	SLC4A4
GO:0043471	regulation of cellular carbohydrate catabolic process	1	36	0.0229955	ENSBTAG00000002348	SLC4A4
GO:0043470	regulation of carbohydrate catabolic process	1	37	0.0236273	ENSBTAG00000002348	SLC4A4
GO:0045981	positive regulation of nucleotide metabolic process	1	39	0.0248899	ENSBTAG00000002348	SLC4A4
GO:1900544	positive regulation of purine nucleotide metabolic process	1	39	0.0248899	ENSBTAG00000002348	SLC4A4
GO:0010676	positive regulation of cellular carbohydrate metabolic process	1	41	0.026151	ENSBTAG00000002348	SLC4A4
GO:0051196	regulation of coenzyme metabolic process	1	43	0.0274106	ENSBTAG00000002348	SLC4A4
GO:0051193	regulation of cofactor metabolic process	1	44	0.0280399	ENSBTAG00000002348	SLC4A4
GO:0045913	positive regulation of carbohydrate metabolic process	1	46	0.0292973	ENSBTAG00000002348	SLC4A4
GO:0051453	regulation of intracellular pH	1	52	0.0330605	ENSBTAG00000002348	SLC4A4
GO:0030641	regulation of cellular pH	1	57	0.0361865	ENSBTAG00000002348	SLC4A4
GO:0044275	cellular carbohydrate catabolic process	1	58	0.0368106	ENSBTAG00000002348	SLC4A4
GO:0006096	glycolytic process	1	65	0.0411689	ENSBTAG00000002348	SLC4A4
GO:0006757	ATP generation from ADP	1	65	0.0411689	ENSBTAG00000002348	SLC4A4
GO:0009118	regulation of nucleoside metabolic process	1	65	0.0411689	ENSBTAG00000002348	SLC4A4
GO:1903578	regulation of ATP metabolic process	1	65	0.0411689	ENSBTAG00000002348	SLC4A4
GO:0006885	regulation of pH	1	68	0.0430312	ENSBTAG00000002348	SLC4A4
GO:0046031	ADP metabolic process	1	72	0.0455093	ENSBTAG00000002348	SLC4A4
GO:0030004	cellular monovalent inorganic cation homeostasis	1	74	0.0467461	ENSBTAG00000002348	SLC4A4
GO:0009135	purine nucleoside diphosphate metabolic process	1	78	0.0492154	ENSBTAG00000002348	SLC4A4
GO:0009179	purine ribonucleoside diphosphate metabolic process	1	78	0.0492154	ENSBTAG00000002348	SLC4A4
GO:0009166	nucleotide catabolic process	1	81	0.0510635	ENSBTAG00000002348	SLC4A4
GO:0009185	ribonucleoside diphosphate metabolic process	1	81	0.0510635	ENSBTAG00000002348	SLC4A4
GO:0006165	nucleoside diphosphate phosphorylation	1	83	0.0522938	ENSBTAG00000002348	SLC4A4
GO:0046939	nucleotide phosphorylation	1	84	0.0529084	ENSBTAG00000002348	SLC4A4
GO:0006090	pyruvate metabolic process	1	86	0.0541365	ENSBTAG00000002348	SLC4A4
GO:0043467	regulation of generation of precursor metabolites and energy	1	89	0.0559759	ENSBTAG00000002348	SLC4A4
GO:1901292	nucleoside phosphate catabolic process	1	91	0.0572004	ENSBTAG00000002348	SLC4A4
GO:0044724	single-organism carbohydrate catabolic process	1	100	0.0626928	ENSBTAG00000002348	SLC4A4
GO:0009132	nucleoside diphosphate metabolic process	1	101	0.0633012	ENSBTAG00000002348	SLC4A4
GO:0016052	carbohydrate catabolic process	1	103	0.0645171	ENSBTAG00000002348	SLC4A4
GO:0019362	pyridine nucleotide metabolic process	1	104	0.0651245	ENSBTAG00000002348	SLC4A4
GO:0046496	nicotinamide nucleotide metabolic process	1	104	0.0651245	ENSBTAG00000002348	SLC4A4
GO:0055067	monovalent inorganic cation homeostasis	1	108	0.0675504	ENSBTAG00000002348	SLC4A4
GO:0072524	pyridine-containing compound metabolic process	1	108	0.0675504	ENSBTAG00000002348	SLC4A4
GO:0006733	oxidoreduction coenzyme metabolic process	1	120	0.074794	ENSBTAG00000002348	SLC4A4
GO:0035725	sodium ion transmembrane transport	1	123	0.0765969	ENSBTAG00000002348	SLC4A4
GO:0010675	regulation of cellular carbohydrate metabolic process	1	131	0.0813889	ENSBTAG00000002348	SLC4A4
GO:0006109	regulation of carbohydrate metabolic process	1	137	0.0849682	ENSBTAG00000002348	SLC4A4
GO:0046434	organophosphate catabolic process	1	145	0.0897207	ENSBTAG00000002348	SLC4A4
GO:0015698	inorganic anion transport	1	147	0.0909053	ENSBTAG00000002348	SLC4A4
GO:0006814	sodium ion transport	1	164	0.100918	ENSBTAG00000002348	SLC4A4
GO:0046034	ATP metabolic process	1	209	0.126941	ENSBTAG00000002348	SLC4A4
GO:0098656	anion transmembrane transport	1	216	0.130927	ENSBTAG00000002348	SLC4A4
GO:0009205	purine ribonucleoside triphosphate metabolic process	1	226	0.136592	ENSBTAG00000002348	SLC4A4
GO:0009144	purine nucleoside triphosphate metabolic process	1	230	0.138849	ENSBTAG00000002348	SLC4A4
GO:0009199	ribonucleoside triphosphate metabolic process	1	233	0.140538	ENSBTAG00000002348	SLC4A4
GO:0009167	purine ribonucleoside monophosphate metabolic process	1	242	0.145587	ENSBTAG00000002348	SLC4A4
GO:0006732	coenzyme metabolic process	1	243	0.146146	ENSBTAG00000002348	SLC4A4
GO:0009126	purine nucleoside monophosphate metabolic process	1	243	0.146146	ENSBTAG00000002348	SLC4A4
GO:0044262	cellular carbohydrate metabolic process	1	243	0.146146	ENSBTAG00000002348	SLC4A4
GO:0009141	nucleoside triphosphate metabolic process	1	250	0.150052	ENSBTAG00000002348	SLC4A4
GO:0009161	ribonucleoside monophosphate metabolic process	1	256	0.153387	ENSBTAG00000002348	SLC4A4
GO:0034655	nucleobase-containing compound catabolic process	1	260	0.155604	ENSBTAG00000002348	SLC4A4
GO:0031331	positive regulation of cellular catabolic process	1	268	0.160022	ENSBTAG00000002348	SLC4A4
GO:0009123	nucleoside monophosphate metabolic process	1	276	0.164419	ENSBTAG00000002348	SLC4A4
GO:0051186	cofactor metabolic process	1	286	0.169885	ENSBTAG00000002348	SLC4A4
GO:0044270	cellular nitrogen compound catabolic process	1	290	0.172063	ENSBTAG00000002348	SLC4A4
GO:0046700	heterocycle catabolic process	1	293	0.173692	ENSBTAG00000002348	SLC4A4
GO:0046128	purine ribonucleoside metabolic process	1	296	0.175319	ENSBTAG00000002348	SLC4A4
GO:0042391	regulation of membrane potential	1	298	0.176402	ENSBTAG00000002348	SLC4A4
GO:0019439	aromatic compound catabolic process	1	299	0.176943	ENSBTAG00000002348	SLC4A4
GO:0042278	purine nucleoside metabolic process	1	300	0.177484	ENSBTAG00000002348	SLC4A4
GO:0006091	generation of precursor metabolites and energy	1	304	0.179643	ENSBTAG00000002348	SLC4A4
GO:0009119	ribonucleoside metabolic process	1	316	0.18609	ENSBTAG00000002348	SLC4A4
GO:1901361	organic cyclic compound catabolic process	1	324	0.190363	ENSBTAG00000002348	SLC4A4
GO:0009896	positive regulation of catabolic process	1	329	0.193023	ENSBTAG00000002348	SLC4A4
GO:0009116	nucleoside metabolic process	1	333	0.195145	ENSBTAG00000002348	SLC4A4
GO:1901657	glycosyl compound metabolic process	1	356	0.20725	ENSBTAG00000002348	SLC4A4
GO:0015711	organic anion transport	1	379	0.219188	ENSBTAG00000002348	SLC4A4
GO:0032787	monocarboxylic acid metabolic process	1	443	0.251555	ENSBTAG00000002348	SLC4A4
GO:0030003	cellular cation homeostasis	1	448	0.254031	ENSBTAG00000002348	SLC4A4
GO:0006873	cellular ion homeostasis	1	457	0.25847	ENSBTAG00000002348	SLC4A4
GO:0015672	monovalent inorganic cation transport	1	480	0.269705	ENSBTAG00000002348	SLC4A4
GO:0031329	regulation of cellular catabolic process	1	508	0.283174	ENSBTAG00000002348	SLC4A4
GO:0055080	cation homeostasis	1	510	0.284127	ENSBTAG00000002348	SLC4A4
GO:0098771	inorganic ion homeostasis	1	517	0.287455	ENSBTAG00000002348	SLC4A4
GO:0055082	cellular chemical homeostasis	1	528	0.292656	ENSBTAG00000002348	SLC4A4
GO:0006820	anion transport	1	541	0.298757	ENSBTAG00000002348	SLC4A4
GO:0050801	ion homeostasis	1	569	0.311737	ENSBTAG00000002348	SLC4A4
GO:0098662	inorganic cation transmembrane transport	1	585	0.319056	ENSBTAG00000002348	SLC4A4
GO:0019725	cellular homeostasis	1	597	0.324499	ENSBTAG00000002348	SLC4A4
GO:0009894	regulation of catabolic process	1	620	0.33482	ENSBTAG00000002348	SLC4A4
GO:0098660	inorganic ion transmembrane transport	1	640	0.343678	ENSBTAG00000002348	SLC4A4
GO:0030001	metal ion transport	1	646	0.346315	ENSBTAG00000002348	SLC4A4
GO:0098655	cation transmembrane transport	1	672	0.357628	ENSBTAG00000002348	SLC4A4
GO:0019752	carboxylic acid metabolic process	1	743	0.387623	ENSBTAG00000002348	SLC4A4
GO:0044712	single-organism catabolic process	1	752	0.391333	ENSBTAG00000002348	SLC4A4
GO:0043436	oxoacid metabolic process	1	802	0.411573	ENSBTAG00000002348	SLC4A4
GO:0006082	organic acid metabolic process	1	822	0.419497	ENSBTAG00000002348	SLC4A4
GO:0048878	chemical homeostasis	1	826	0.42107	ENSBTAG00000002348	SLC4A4
GO:0006812	cation transport	1	907	0.4521	ENSBTAG00000002348	SLC4A4
GO:0034220	ion transmembrane transport	1	914	0.45471	ENSBTAG00000002348	SLC4A4
GO:0042592	homeostatic process	1	1286	0.578174	ENSBTAG00000002348	SLC4A4
GO:0006811	ion transport	1	1356	0.598339	ENSBTAG00000002348	SLC4A4
GO:0071702	organic substance transport	1	1710	0.687537	ENSBTAG00000002348	SLC4A4
GO:0044248	cellular catabolic process	2	1472	0.244709	ENSBTAG00000002348;ENSBTAG00000014156	SLC4A4;AMN1
GO:1901575	organic substance catabolic process	2	1534	0.260084	ENSBTAG00000002348;ENSBTAG00000014156	SLC4A4;AMN1
GO:0009056	catabolic process	2	1776	0.320519	ENSBTAG00000002348;ENSBTAG00000014156	SLC4A4;AMN1
GO:0044723	single-organism carbohydrate metabolic process	2	555	0.0479147	ENSBTAG00000002348;ENSBTAG00000047670	SLC4A4;CHST8
GO:0005975	carbohydrate metabolic process	2	637	0.0613398	ENSBTAG00000002348;ENSBTAG00000047670	SLC4A4;CHST8
GO:0065008	regulation of biological quality	2	2792	0.559137	ENSBTAG00000002348;ENSBTAG00000047670	SLC4A4;CHST8
GO:0009987	cellular process	9	15468	0.925764	ENSBTAG00000002348;ENSBTAG00000005761;ENSBTAG00000008556;ENSBTAG00000009070;ENSBTAG00000013718;ENSBTAG00000013958;ENSBTAG00000014156;ENSBTAG00000018225;ENSBTAG00000047670	SLC4A4;DEDD2;POU2F2;NPFFR2;GC;PAK4;AMN1;SIPA1L3;CHST8
GO:0044763	single-organism cellular process	7	11990	0.797254	ENSBTAG00000002348;ENSBTAG00000005761;ENSBTAG00000008556;ENSBTAG00000009070;ENSBTAG00000013718;ENSBTAG00000013958;ENSBTAG00000018225	SLC4A4;DEDD2;POU2F2;NPFFR2;GC;PAK4;SIPA1L3
GO:0044699	single-organism process	8	13205	0.778795	ENSBTAG00000002348;ENSBTAG00000005761;ENSBTAG00000008556;ENSBTAG00000009070;ENSBTAG00000013718;ENSBTAG00000013958;ENSBTAG00000018225;ENSBTAG00000047670	SLC4A4;DEDD2;POU2F2;NPFFR2;GC;PAK4;SIPA1L3;CHST8
GO:0050794	regulation of cellular process	6	9861	0.704146	ENSBTAG00000002348;ENSBTAG00000005761;ENSBTAG00000008556;ENSBTAG00000009070;ENSBTAG00000013958;ENSBTAG00000018225	SLC4A4;DEDD2;POU2F2;NPFFR2;PAK4;SIPA1L3
GO:0050789	regulation of biological process	6	10392	0.774493	ENSBTAG00000002348;ENSBTAG00000005761;ENSBTAG00000008556;ENSBTAG00000009070;ENSBTAG00000013958;ENSBTAG00000018225	SLC4A4;DEDD2;POU2F2;NPFFR2;PAK4;SIPA1L3
GO:0065007	biological regulation	7	10899	0.640396	ENSBTAG00000002348;ENSBTAG00000005761;ENSBTAG00000008556;ENSBTAG00000009070;ENSBTAG00000013958;ENSBTAG00000018225;ENSBTAG00000047670	SLC4A4;DEDD2;POU2F2;NPFFR2;PAK4;SIPA1L3;CHST8
GO:0048522	positive regulation of cellular process	4	4247	0.284355	ENSBTAG00000002348;ENSBTAG00000005761;ENSBTAG00000008556;ENSBTAG00000013958	SLC4A4;DEDD2;POU2F2;PAK4
GO:0048518	positive regulation of biological process	5	4868	0.179653	ENSBTAG00000002348;ENSBTAG00000005761;ENSBTAG00000008556;ENSBTAG00000013958;ENSBTAG00000018225	SLC4A4;DEDD2;POU2F2;PAK4;SIPA1L3
GO:0055085	transmembrane transport	2	1271	0.195682	ENSBTAG00000002348;ENSBTAG00000013718	SLC4A4;GC
GO:0044765	single-organism transport	2	3150	0.630964	ENSBTAG00000002348;ENSBTAG00000013718	SLC4A4;GC
GO:1902578	single-organism localization	2	3365	0.670279	ENSBTAG00000002348;ENSBTAG00000013718	SLC4A4;GC
GO:0006810	transport	2	3526	0.6978	ENSBTAG00000002348;ENSBTAG00000013718	SLC4A4;GC
GO:0051234	establishment of localization	2	3668	0.72071	ENSBTAG00000002348;ENSBTAG00000013718	SLC4A4;GC
GO:0051179	localization	2	4951	0.873808	ENSBTAG00000002348;ENSBTAG00000013718	SLC4A4;GC
GO:1900542	regulation of purine nucleotide metabolic process	2	98	0.00173985	ENSBTAG00000002348;ENSBTAG00000009070	SLC4A4;NPFFR2
GO:0006140	regulation of nucleotide metabolic process	2	100	0.00181069	ENSBTAG00000002348;ENSBTAG00000009070	SLC4A4;NPFFR2
GO:0009150	purine ribonucleotide metabolic process	2	349	0.0203491	ENSBTAG00000002348;ENSBTAG00000009070	SLC4A4;NPFFR2
GO:0006163	purine nucleotide metabolic process	2	359	0.021458	ENSBTAG00000002348;ENSBTAG00000009070	SLC4A4;NPFFR2
GO:0009259	ribonucleotide metabolic process	2	365	0.0221355	ENSBTAG00000002348;ENSBTAG00000009070	SLC4A4;NPFFR2
GO:0019693	ribose phosphate metabolic process	2	377	0.0235174	ENSBTAG00000002348;ENSBTAG00000009070	SLC4A4;NPFFR2
GO:0072521	purine-containing compound metabolic process	2	396	0.025778	ENSBTAG00000002348;ENSBTAG00000009070	SLC4A4;NPFFR2
GO:0009117	nucleotide metabolic process	2	452	0.0329393	ENSBTAG00000002348;ENSBTAG00000009070	SLC4A4;NPFFR2
GO:0006753	nucleoside phosphate metabolic process	2	463	0.0344304	ENSBTAG00000002348;ENSBTAG00000009070	SLC4A4;NPFFR2
GO:0055086	nucleobase-containing small molecule metabolic process	2	502	0.0399303	ENSBTAG00000002348;ENSBTAG00000009070	SLC4A4;NPFFR2
GO:0019637	organophosphate metabolic process	2	837	0.0987567	ENSBTAG00000002348;ENSBTAG00000009070	SLC4A4;NPFFR2
GO:1901564	organonitrogen compound metabolic process	2	1837	0.335745	ENSBTAG00000002348;ENSBTAG00000009070	SLC4A4;NPFFR2
GO:1901135	carbohydrate derivative metabolic process	3	947	0.0201626	ENSBTAG00000002348;ENSBTAG00000009070;ENSBTAG00000047670	SLC4A4;NPFFR2;CHST8
GO:0044281	small molecule metabolic process	3	1558	0.0720797	ENSBTAG00000002348;ENSBTAG00000009070;ENSBTAG00000013718	SLC4A4;NPFFR2;GC
GO:0044710	single-organism metabolic process	4	4142	0.267577	ENSBTAG00000002348;ENSBTAG00000009070;ENSBTAG00000013718;ENSBTAG00000047670	SLC4A4;NPFFR2;GC;CHST8
GO:0042325	regulation of phosphorylation	3	1197	0.0372346	ENSBTAG00000002348;ENSBTAG00000009070;ENSBTAG00000013958	SLC4A4;NPFFR2;PAK4
GO:0019220	regulation of phosphate metabolic process	3	1361	0.0515951	ENSBTAG00000002348;ENSBTAG00000009070;ENSBTAG00000013958	SLC4A4;NPFFR2;PAK4
GO:0051174	regulation of phosphorus metabolic process	3	1365	0.0519763	ENSBTAG00000002348;ENSBTAG00000009070;ENSBTAG00000013958	SLC4A4;NPFFR2;PAK4
GO:0016310	phosphorylation	3	1849	0.108395	ENSBTAG00000002348;ENSBTAG00000009070;ENSBTAG00000013958	SLC4A4;NPFFR2;PAK4
GO:0006796	phosphate-containing compound metabolic process	3	2600	0.228884	ENSBTAG00000002348;ENSBTAG00000009070;ENSBTAG00000013958	SLC4A4;NPFFR2;PAK4
GO:0006793	phosphorus metabolic process	3	2642	0.236469	ENSBTAG00000002348;ENSBTAG00000009070;ENSBTAG00000013958	SLC4A4;NPFFR2;PAK4
GO:0042327	positive regulation of phosphorylation	2	793	0.0900206	ENSBTAG00000002348;ENSBTAG00000013958	SLC4A4;PAK4
GO:0010562	positive regulation of phosphorus metabolic process	2	842	0.0997656	ENSBTAG00000002348;ENSBTAG00000013958	SLC4A4;PAK4
GO:0045937	positive regulation of phosphate metabolic process	2	842	0.0997656	ENSBTAG00000002348;ENSBTAG00000013958	SLC4A4;PAK4
GO:0045935	positive regulation of nucleobase-containing compound metabolic process	2	1609	0.278773	ENSBTAG00000002348;ENSBTAG00000008556	SLC4A4;POU2F2
GO:0051173	positive regulation of nitrogen compound metabolic process	2	1704	0.302518	ENSBTAG00000002348;ENSBTAG00000008556	SLC4A4;POU2F2
GO:0019219	regulation of nucleobase-containing compound metabolic process	3	3259	0.35338	ENSBTAG00000002348;ENSBTAG00000008556;ENSBTAG00000009070	SLC4A4;POU2F2;NPFFR2
GO:0051171	regulation of nitrogen compound metabolic process	3	3487	0.397801	ENSBTAG00000002348;ENSBTAG00000008556;ENSBTAG00000009070	SLC4A4;POU2F2;NPFFR2
GO:0006139	nucleobase-containing compound metabolic process	3	4733	0.627036	ENSBTAG00000002348;ENSBTAG00000008556;ENSBTAG00000009070	SLC4A4;POU2F2;NPFFR2
GO:0046483	heterocycle metabolic process	3	4856	0.647161	ENSBTAG00000002348;ENSBTAG00000008556;ENSBTAG00000009070	SLC4A4;POU2F2;NPFFR2
GO:0006725	cellular aromatic compound metabolic process	3	4881	0.651179	ENSBTAG00000002348;ENSBTAG00000008556;ENSBTAG00000009070	SLC4A4;POU2F2;NPFFR2
GO:0034641	cellular nitrogen compound metabolic process	3	5565	0.750982	ENSBTAG00000002348;ENSBTAG00000008556;ENSBTAG00000009070	SLC4A4;POU2F2;NPFFR2
GO:0006807	nitrogen compound metabolic process	3	5848	0.786303	ENSBTAG00000002348;ENSBTAG00000008556;ENSBTAG00000009070	SLC4A4;POU2F2;NPFFR2
GO:1901360	organic cyclic compound metabolic process	4	5044	0.418468	ENSBTAG00000002348;ENSBTAG00000008556;ENSBTAG00000009070;ENSBTAG00000013718	SLC4A4;POU2F2;NPFFR2;GC
GO:0044238	primary metabolic process	8	9407	0.194527	ENSBTAG00000002348;ENSBTAG00000008556;ENSBTAG00000009070;ENSBTAG00000013718;ENSBTAG00000013958;ENSBTAG00000014156;ENSBTAG00000031941;ENSBTAG00000047670	SLC4A4;POU2F2;NPFFR2;GC;PAK4;AMN1;PEPD;CHST8
GO:0071704	organic substance metabolic process	8	9800	0.240168	ENSBTAG00000002348;ENSBTAG00000008556;ENSBTAG00000009070;ENSBTAG00000013718;ENSBTAG00000013958;ENSBTAG00000014156;ENSBTAG00000031941;ENSBTAG00000047670	SLC4A4;POU2F2;NPFFR2;GC;PAK4;AMN1;PEPD;CHST8
GO:0008152	metabolic process	9	10579	0.148734	ENSBTAG00000002348;ENSBTAG00000008556;ENSBTAG00000009070;ENSBTAG00000013718;ENSBTAG00000013958;ENSBTAG00000014156;ENSBTAG00000018225;ENSBTAG00000031941;ENSBTAG00000047670	SLC4A4;POU2F2;NPFFR2;GC;PAK4;AMN1;SIPA1L3;PEPD;CHST8
GO:0080090	regulation of primary metabolic process	4	4946	0.401608	ENSBTAG00000002348;ENSBTAG00000008556;ENSBTAG00000009070;ENSBTAG00000013958	SLC4A4;POU2F2;NPFFR2;PAK4
GO:0031323	regulation of cellular metabolic process	4	5004	0.411583	ENSBTAG00000002348;ENSBTAG00000008556;ENSBTAG00000009070;ENSBTAG00000013958	SLC4A4;POU2F2;NPFFR2;PAK4
GO:0060255	regulation of macromolecule metabolic process	4	5026	0.415369	ENSBTAG00000002348;ENSBTAG00000008556;ENSBTAG00000009070;ENSBTAG00000013958	SLC4A4;POU2F2;NPFFR2;PAK4
GO:0044237	cellular metabolic process	6	9227	0.610654	ENSBTAG00000002348;ENSBTAG00000008556;ENSBTAG00000009070;ENSBTAG00000013958;ENSBTAG00000014156;ENSBTAG00000047670	SLC4A4;POU2F2;NPFFR2;PAK4;AMN1;CHST8
GO:0043170	macromolecule metabolic process	7	8346	0.251478	ENSBTAG00000002348;ENSBTAG00000008556;ENSBTAG00000009070;ENSBTAG00000013958;ENSBTAG00000014156;ENSBTAG00000031941;ENSBTAG00000047670	SLC4A4;POU2F2;NPFFR2;PAK4;AMN1;PEPD;CHST8
GO:0019222	regulation of metabolic process	5	5770	0.302025	ENSBTAG00000002348;ENSBTAG00000008556;ENSBTAG00000009070;ENSBTAG00000013958;ENSBTAG00000018225	SLC4A4;POU2F2;NPFFR2;PAK4;SIPA1L3
GO:0031325	positive regulation of cellular metabolic process	3	2654	0.238649	ENSBTAG00000002348;ENSBTAG00000008556;ENSBTAG00000013958	SLC4A4;POU2F2;PAK4
GO:0009893	positive regulation of metabolic process	4	3099	0.123181	ENSBTAG00000002348;ENSBTAG00000008556;ENSBTAG00000013958;ENSBTAG00000018225	SLC4A4;POU2F2;PAK4;SIPA1L3
