# Supplementary material for: A Million-Cow Genome-Wide Association Study of Three Fertility Traits in U.S. Holstein Cows
Source: Int J Mol Sci. 2023 Jun 22;24(13):10496. doi: 10.3390/ijms241310496 (PMC10341978; doi:10.3390/ijms241310496)
Supplement: Supplementary file 1 [file ijms-24-10496-s001.zip › Supplementary_materials/Table_S10.xlsx]

## Sheet: S10
GO.ID	Description of GO ID	Gene count	All..17045.	pvalue	Ensembl ID	gene_name
GO:0035021	negative regulation of Rac protein signal transduction	1	3	0.0028136	ENSBTAG00000021938	ARHGAP44
GO:0035020	regulation of Rac protein signal transduction	1	16	0.0149203	ENSBTAG00000021938	ARHGAP44
GO:0061001	regulation of dendritic spine morphogenesis	1	19	0.0176945	ENSBTAG00000021938	ARHGAP44
GO:0016601	Rac protein signal transduction	1	31	0.0287183	ENSBTAG00000021938	ARHGAP44
GO:0060997	dendritic spine morphogenesis	1	33	0.0305443	ENSBTAG00000021938	ARHGAP44
GO:0060998	regulation of dendritic spine development	1	35	0.0323671	ENSBTAG00000021938	ARHGAP44
GO:0046580	negative regulation of Ras protein signal transduction	1	41	0.0378161	ENSBTAG00000021938	ARHGAP44
GO:0097061	dendritic spine organization	1	43	0.0396261	ENSBTAG00000021938	ARHGAP44
GO:0048814	regulation of dendrite morphogenesis	1	45	0.0414328	ENSBTAG00000021938	ARHGAP44
GO:0051058	negative regulation of small GTPase mediated signal transduction	1	47	0.0432364	ENSBTAG00000021938	ARHGAP44
GO:0060996	dendritic spine development	1	53	0.048628	ENSBTAG00000021938	ARHGAP44
GO:0048813	dendrite morphogenesis	1	81	0.0734144	ENSBTAG00000021938	ARHGAP44
GO:0050773	regulation of dendrite development	1	82	0.0742884	ENSBTAG00000021938	ARHGAP44
GO:0046578	regulation of Ras protein signal transduction	1	158	0.138492	ENSBTAG00000021938	ARHGAP44
GO:0051056	regulation of small GTPase mediated signal transduction	1	185	0.160278	ENSBTAG00000021938	ARHGAP44
GO:0007265	Ras protein signal transduction	1	264	0.221094	ENSBTAG00000021938	ARHGAP44
GO:0032956	regulation of actin cytoskeleton organization	1	283	0.235091	ENSBTAG00000021938	ARHGAP44
GO:0032970	regulation of actin filament-based process	1	307	0.252435	ENSBTAG00000021938	ARHGAP44
GO:0007264	small GTPase mediated signal transduction	1	357	0.287391	ENSBTAG00000021938	ARHGAP44
GO:0051493	regulation of cytoskeleton organization	1	450	0.34837	ENSBTAG00000021938	ARHGAP44
GO:0030036	actin cytoskeleton organization	1	569	0.419275	ENSBTAG00000021938	ARHGAP44
GO:0030029	actin filament-based process	1	623	0.449004	ENSBTAG00000021938	ARHGAP44
GO:0033043	regulation of organelle organization	2	1004	0.242288	ENSBTAG00000021938;ENSBTAG00000035706	ARHGAP44;MYOCD
GO:0048033	heme o metabolic process	1	1	0.000938692	ENSBTAG00000015294	COX10
GO:0048034	heme O biosynthetic process	1	1	0.000938692	ENSBTAG00000015294	COX10
GO:0006784	heme a biosynthetic process	1	2	0.00187656	ENSBTAG00000015294	COX10
GO:0046160	heme a metabolic process	1	2	0.00187656	ENSBTAG00000015294	COX10
GO:0006783	heme biosynthetic process	1	16	0.0149203	ENSBTAG00000015294	COX10
GO:0006779	porphyrin-containing compound biosynthetic process	1	19	0.0176945	ENSBTAG00000015294	COX10
GO:0008535	respiratory chain complex IV assembly	1	22	0.0204614	ENSBTAG00000015294	COX10
GO:0033014	tetrapyrrole biosynthetic process	1	22	0.0204614	ENSBTAG00000015294	COX10
GO:0042168	heme metabolic process	1	22	0.0204614	ENSBTAG00000015294	COX10
GO:0006778	porphyrin-containing compound metabolic process	1	26	0.0241393	ENSBTAG00000015294	COX10
GO:0017004	cytochrome complex assembly	1	31	0.0287183	ENSBTAG00000015294	COX10
GO:0000266	mitochondrial fission	1	33	0.0305443	ENSBTAG00000015294	COX10
GO:0033013	tetrapyrrole metabolic process	1	33	0.0305443	ENSBTAG00000015294	COX10
GO:0009060	aerobic respiration	1	41	0.0378161	ENSBTAG00000015294	COX10
GO:0046148	pigment biosynthetic process	1	42	0.0387215	ENSBTAG00000015294	COX10
GO:0042440	pigment metabolic process	1	51	0.046834	ENSBTAG00000015294	COX10
GO:0022900	electron transport chain	1	114	0.10185	ENSBTAG00000015294	COX10
GO:0051188	cofactor biosynthetic process	1	115	0.102698	ENSBTAG00000015294	COX10
GO:0045333	cellular respiration	1	119	0.106086	ENSBTAG00000015294	COX10
GO:1902600	hydrogen ion transmembrane transport	1	130	0.11534	ENSBTAG00000015294	COX10
GO:0006818	hydrogen transport	1	142	0.125333	ENSBTAG00000015294	COX10
GO:0015992	proton transport	1	142	0.125333	ENSBTAG00000015294	COX10
GO:0015980	energy derivation by oxidation of organic compounds	1	189	0.163461	ENSBTAG00000015294	COX10
GO:0034220	ion transmembrane transport	2	914	0.210591	ENSBTAG00000015294;ENSBTAG00000049618	COX10
GO:0048285	organelle fission	1	383	0.304957	ENSBTAG00000015294	COX10
GO:0007005	mitochondrion organization	1	454	0.35088	ENSBTAG00000015294	COX10
GO:0015672	monovalent inorganic cation transport	1	480	0.366973	ENSBTAG00000015294	COX10
GO:0006811	ion transport	2	1356	0.367514	ENSBTAG00000015294;ENSBTAG00000049618	COX10
GO:0043623	cellular protein complex assembly	1	526	0.394533	ENSBTAG00000015294	COX10
GO:0098662	inorganic cation transmembrane transport	1	585	0.428236	ENSBTAG00000015294	COX10
GO:0098660	inorganic ion transmembrane transport	1	640	0.458064	ENSBTAG00000015294	COX10
GO:0098655	cation transmembrane transport	1	672	0.47474	ENSBTAG00000015294	COX10
GO:0006812	cation transport	1	907	0.583254	ENSBTAG00000015294	COX10
GO:0034622	cellular macromolecular complex assembly	1	960	0.604631	ENSBTAG00000015294	COX10
GO:0055114	oxidation-reduction process	2	767	0.160351	ENSBTAG00000015294;ENSBTAG00000031679	COX10;HSD17B13
GO:0044711	single-organism biosynthetic process	2	1168	0.300789	ENSBTAG00000015294;ENSBTAG00000031679	COX10;HSD17B13
GO:0030948	negative regulation of vascular endothelial growth factor receptor signaling pathway	1	9	0.00841854	ENSBTAG00000017771	EPN2
GO:0030947	regulation of vascular endothelial growth factor receptor signaling pathway	1	18	0.0167706	ENSBTAG00000017771	EPN2
GO:1903671	negative regulation of sprouting angiogenesis	1	25	0.023221	ENSBTAG00000017771	EPN2
GO:0048010	vascular endothelial growth factor receptor signaling pathway	1	33	0.0305443	ENSBTAG00000017771	EPN2
GO:0045747	positive regulation of Notch signaling pathway	1	36	0.0332773	ENSBTAG00000017771	EPN2
GO:1903670	regulation of sprouting angiogenesis	1	56	0.0513131	ENSBTAG00000017771	EPN2
GO:0008593	regulation of Notch signaling pathway	1	69	0.0628668	ENSBTAG00000017771	EPN2
GO:0016525	negative regulation of angiogenesis	1	86	0.0777764	ENSBTAG00000017771	EPN2
GO:2000181	negative regulation of blood vessel morphogenesis	1	87	0.0786465	ENSBTAG00000017771	EPN2
GO:1901343	negative regulation of vasculature development	1	90	0.0812521	ENSBTAG00000017771	EPN2
GO:0002040	sprouting angiogenesis	1	94	0.0847155	ENSBTAG00000017771	EPN2
GO:0090288	negative regulation of cellular response to growth factor stimulus	1	120	0.106931	ENSBTAG00000017771	EPN2
GO:0007219	Notch signaling pathway	1	130	0.11534	ENSBTAG00000017771	EPN2
GO:0045765	regulation of angiogenesis	1	211	0.180768	ENSBTAG00000017771	EPN2
GO:1901342	regulation of vasculature development	1	224	0.190837	ENSBTAG00000017771	EPN2
GO:0001525	angiogenesis	1	352	0.283966	ENSBTAG00000017771	EPN2
GO:0048646	anatomical structure formation involved in morphogenesis	1	934	0.594276	ENSBTAG00000017771	EPN2
GO:0090287	regulation of cellular response to growth factor stimulus	2	219	0.0175159	ENSBTAG00000017771;ENSBTAG00000035706	EPN2;MYOCD
GO:0048514	blood vessel morphogenesis	2	430	0.060354	ENSBTAG00000017771;ENSBTAG00000035706	EPN2;MYOCD
GO:0007169	transmembrane receptor protein tyrosine kinase signaling pathway	2	468	0.0700516	ENSBTAG00000017771;ENSBTAG00000035706	EPN2;MYOCD
GO:0001568	blood vessel development	2	497	0.077784	ENSBTAG00000017771;ENSBTAG00000035706	EPN2;MYOCD
GO:0001944	vasculature development	2	517	0.083273	ENSBTAG00000017771;ENSBTAG00000035706	EPN2;MYOCD
GO:0072358	cardiovascular system development	2	758	0.157363	ENSBTAG00000017771;ENSBTAG00000035706	EPN2;MYOCD
GO:0072359	circulatory system development	2	764	0.159354	ENSBTAG00000017771;ENSBTAG00000035706	EPN2;MYOCD
GO:0030509	BMP signaling pathway	1	128	0.113664	ENSBTAG00000003705	FAM83G
GO:0071772	response to BMP	1	136	0.12035	ENSBTAG00000003705	FAM83G
GO:0071773	cellular response to BMP stimulus	1	136	0.12035	ENSBTAG00000003705	FAM83G
GO:0071363	cellular response to growth factor stimulus	3	459	0.00836654	ENSBTAG00000003705;ENSBTAG00000017771;ENSBTAG00000035706	FAM83G;EPN2;MYOCD
GO:0070848	response to growth factor	3	469	0.00887553	ENSBTAG00000003705;ENSBTAG00000017771;ENSBTAG00000035706	FAM83G;EPN2;MYOCD
GO:0007167	enzyme linked receptor protein signaling pathway	3	737	0.0295974	ENSBTAG00000003705;ENSBTAG00000017771;ENSBTAG00000035706	FAM83G;EPN2;MYOCD
GO:0007166	cell surface receptor signaling pathway	4	2074	0.120714	ENSBTAG00000003705;ENSBTAG00000017771;ENSBTAG00000035706;ENSBTAG00000049618	FAM83G;EPN2;MYOCD
GO:0007178	transmembrane receptor protein serine/threonine kinase signaling pathway	2	283	0.0282777	ENSBTAG00000003705;ENSBTAG00000035706	FAM83G;MYOCD
GO:0010468	regulation of gene expression	4	3559	0.43706	ENSBTAG00000003705;ENSBTAG00000013271;ENSBTAG00000018488;ENSBTAG00000035706	FAM83G;NCOR1;AFF1;MYOCD
GO:0010467	gene expression	4	4740	0.690031	ENSBTAG00000003705;ENSBTAG00000013271;ENSBTAG00000018488;ENSBTAG00000035706	FAM83G;NCOR1;AFF1;MYOCD
GO:1901576	organic substance biosynthetic process	5	4956	0.517485	ENSBTAG00000003705;ENSBTAG00000013271;ENSBTAG00000015294;ENSBTAG00000031679;ENSBTAG00000035706	FAM83G;NCOR1;COX10;HSD17B13;MYOCD
GO:0009058	biosynthetic process	5	5038	0.534568	ENSBTAG00000003705;ENSBTAG00000013271;ENSBTAG00000015294;ENSBTAG00000031679;ENSBTAG00000035706	FAM83G;NCOR1;COX10;HSD17B13;MYOCD
GO:0018130	heterocycle biosynthetic process	4	3333	0.384018	ENSBTAG00000003705;ENSBTAG00000013271;ENSBTAG00000015294;ENSBTAG00000035706	FAM83G;NCOR1;COX10;MYOCD
GO:0019438	aromatic compound biosynthetic process	4	3339	0.385427	ENSBTAG00000003705;ENSBTAG00000013271;ENSBTAG00000015294;ENSBTAG00000035706	FAM83G;NCOR1;COX10;MYOCD
GO:1901362	organic cyclic compound biosynthetic process	4	3421	0.404685	ENSBTAG00000003705;ENSBTAG00000013271;ENSBTAG00000015294;ENSBTAG00000035706	FAM83G;NCOR1;COX10;MYOCD
GO:0044271	cellular nitrogen compound biosynthetic process	4	4026	0.544061	ENSBTAG00000003705;ENSBTAG00000013271;ENSBTAG00000015294;ENSBTAG00000035706	FAM83G;NCOR1;COX10;MYOCD
GO:0046483	heterocycle metabolic process	4	4856	0.710955	ENSBTAG00000003705;ENSBTAG00000013271;ENSBTAG00000015294;ENSBTAG00000035706	FAM83G;NCOR1;COX10;MYOCD
GO:0006725	cellular aromatic compound metabolic process	4	4881	0.715351	ENSBTAG00000003705;ENSBTAG00000013271;ENSBTAG00000015294;ENSBTAG00000035706	FAM83G;NCOR1;COX10;MYOCD
GO:0044249	cellular biosynthetic process	4	4892	0.717272	ENSBTAG00000003705;ENSBTAG00000013271;ENSBTAG00000015294;ENSBTAG00000035706	FAM83G;NCOR1;COX10;MYOCD
GO:1901360	organic cyclic compound metabolic process	4	5044	0.743008	ENSBTAG00000003705;ENSBTAG00000013271;ENSBTAG00000015294;ENSBTAG00000035706	FAM83G;NCOR1;COX10;MYOCD
GO:0034641	cellular nitrogen compound metabolic process	4	5565	0.819512	ENSBTAG00000003705;ENSBTAG00000013271;ENSBTAG00000015294;ENSBTAG00000035706	FAM83G;NCOR1;COX10;MYOCD
GO:0006807	nitrogen compound metabolic process	4	5848	0.853572	ENSBTAG00000003705;ENSBTAG00000013271;ENSBTAG00000015294;ENSBTAG00000035706	FAM83G;NCOR1;COX10;MYOCD
GO:0071310	cellular response to organic substance	4	1667	0.0638766	ENSBTAG00000003705;ENSBTAG00000013271;ENSBTAG00000017771;ENSBTAG00000035706	FAM83G;NCOR1;EPN2;MYOCD
GO:0010033	response to organic substance	4	2013	0.111016	ENSBTAG00000003705;ENSBTAG00000013271;ENSBTAG00000017771;ENSBTAG00000035706	FAM83G;NCOR1;EPN2;MYOCD
GO:0009889	regulation of biosynthetic process	4	3364	0.391296	ENSBTAG00000003705;ENSBTAG00000013271;ENSBTAG00000031679;ENSBTAG00000035706	FAM83G;NCOR1;HSD17B13;MYOCD
GO:0071495	cellular response to endogenous stimulus	3	879	0.0463104	ENSBTAG00000003705;ENSBTAG00000013271;ENSBTAG00000035706	FAM83G;NCOR1;MYOCD
GO:0009719	response to endogenous stimulus	3	1007	0.064723	ENSBTAG00000003705;ENSBTAG00000013271;ENSBTAG00000035706	FAM83G;NCOR1;MYOCD
GO:0006357	regulation of transcription from RNA polymerase II promoter	3	2118	0.319478	ENSBTAG00000003705;ENSBTAG00000013271;ENSBTAG00000035706	FAM83G;NCOR1;MYOCD
GO:0006366	transcription from RNA polymerase II promoter	3	2191	0.339327	ENSBTAG00000003705;ENSBTAG00000013271;ENSBTAG00000035706	FAM83G;NCOR1;MYOCD
GO:0006355	regulation of transcription, DNA-templated	3	2844	0.514083	ENSBTAG00000003705;ENSBTAG00000013271;ENSBTAG00000035706	FAM83G;NCOR1;MYOCD
GO:1903506	regulation of nucleic acid-templated transcription	3	2845	0.514339	ENSBTAG00000003705;ENSBTAG00000013271;ENSBTAG00000035706	FAM83G;NCOR1;MYOCD
GO:2001141	regulation of RNA biosynthetic process	3	2851	0.515873	ENSBTAG00000003705;ENSBTAG00000013271;ENSBTAG00000035706	FAM83G;NCOR1;MYOCD
GO:0006351	transcription, DNA-templated	3	2972	0.54636	ENSBTAG00000003705;ENSBTAG00000013271;ENSBTAG00000035706	FAM83G;NCOR1;MYOCD
GO:0097659	nucleic acid-templated transcription	3	2973	0.546608	ENSBTAG00000003705;ENSBTAG00000013271;ENSBTAG00000035706	FAM83G;NCOR1;MYOCD
GO:0032774	RNA biosynthetic process	3	2990	0.55082	ENSBTAG00000003705;ENSBTAG00000013271;ENSBTAG00000035706	FAM83G;NCOR1;MYOCD
GO:0051252	regulation of RNA metabolic process	3	3001	0.553535	ENSBTAG00000003705;ENSBTAG00000013271;ENSBTAG00000035706	FAM83G;NCOR1;MYOCD
GO:2000112	regulation of cellular macromolecule biosynthetic process	3	3190	0.598926	ENSBTAG00000003705;ENSBTAG00000013271;ENSBTAG00000035706	FAM83G;NCOR1;MYOCD
GO:0010556	regulation of macromolecule biosynthetic process	3	3213	0.604278	ENSBTAG00000003705;ENSBTAG00000013271;ENSBTAG00000035706	FAM83G;NCOR1;MYOCD
GO:0019219	regulation of nucleobase-containing compound metabolic process	3	3259	0.614865	ENSBTAG00000003705;ENSBTAG00000013271;ENSBTAG00000035706	FAM83G;NCOR1;MYOCD
GO:0034654	nucleobase-containing compound biosynthetic process	3	3270	0.617373	ENSBTAG00000003705;ENSBTAG00000013271;ENSBTAG00000035706	FAM83G;NCOR1;MYOCD
GO:0031326	regulation of cellular biosynthetic process	3	3323	0.629329	ENSBTAG00000003705;ENSBTAG00000013271;ENSBTAG00000035706	FAM83G;NCOR1;MYOCD
GO:0051171	regulation of nitrogen compound metabolic process	3	3487	0.664931	ENSBTAG00000003705;ENSBTAG00000013271;ENSBTAG00000035706	FAM83G;NCOR1;MYOCD
GO:0016070	RNA metabolic process	3	3824	0.731185	ENSBTAG00000003705;ENSBTAG00000013271;ENSBTAG00000035706	FAM83G;NCOR1;MYOCD
GO:0034645	cellular macromolecule biosynthetic process	3	4171	0.789481	ENSBTAG00000003705;ENSBTAG00000013271;ENSBTAG00000035706	FAM83G;NCOR1;MYOCD
GO:0009059	macromolecule biosynthetic process	3	4208	0.79511	ENSBTAG00000003705;ENSBTAG00000013271;ENSBTAG00000035706	FAM83G;NCOR1;MYOCD
GO:0090304	nucleic acid metabolic process	3	4274	0.804876	ENSBTAG00000003705;ENSBTAG00000013271;ENSBTAG00000035706	FAM83G;NCOR1;MYOCD
GO:0006139	nucleobase-containing compound metabolic process	3	4733	0.863463	ENSBTAG00000003705;ENSBTAG00000013271;ENSBTAG00000035706	FAM83G;NCOR1;MYOCD
GO:0070887	cellular response to chemical stimulus	5	2063	0.0359059	ENSBTAG00000003705;ENSBTAG00000012137;ENSBTAG00000013271;ENSBTAG00000017771;ENSBTAG00000035706	FAM83G;NTN1;NCOR1;EPN2;MYOCD
GO:0042221	response to chemical	5	3751	0.265356	ENSBTAG00000003705;ENSBTAG00000012137;ENSBTAG00000013271;ENSBTAG00000017771;ENSBTAG00000035706	FAM83G;NTN1;NCOR1;EPN2;MYOCD
GO:0050789	regulation of biological process	13	10392	0.0754788	ENSBTAG00000003705;ENSBTAG00000011505;ENSBTAG00000012137;ENSBTAG00000012293;ENSBTAG00000013271;ENSBTAG00000017771;ENSBTAG00000018488;ENSBTAG00000021938;ENSBTAG00000031679;ENSBTAG00000035706;ENSBTAG00000040489;ENSBTAG00000049618;ENSBTAG00000052671	FAM83G;RABEP1;NTN1;SPAG9;NCOR1;EPN2;AFF1;ARHGAP44;HSD17B13;MYOCD;LOC516101;LOC511136
GO:0065007	biological regulation	13	10899	0.115938	ENSBTAG00000003705;ENSBTAG00000011505;ENSBTAG00000012137;ENSBTAG00000012293;ENSBTAG00000013271;ENSBTAG00000017771;ENSBTAG00000018488;ENSBTAG00000021938;ENSBTAG00000031679;ENSBTAG00000035706;ENSBTAG00000040489;ENSBTAG00000049618;ENSBTAG00000052671	FAM83G;RABEP1;NTN1;SPAG9;NCOR1;EPN2;AFF1;ARHGAP44;HSD17B13;MYOCD;LOC516101;LOC511136
GO:0051716	cellular response to stimulus	11	6476	0.0124576	ENSBTAG00000003705;ENSBTAG00000011505;ENSBTAG00000012137;ENSBTAG00000012293;ENSBTAG00000013271;ENSBTAG00000017771;ENSBTAG00000021938;ENSBTAG00000035706;ENSBTAG00000040489;ENSBTAG00000049618;ENSBTAG00000052671	FAM83G;RABEP1;NTN1;SPAG9;NCOR1;EPN2;ARHGAP44;MYOCD;LOC516101;LOC511136
GO:0050896	response to stimulus	11	7535	0.0423504	ENSBTAG00000003705;ENSBTAG00000011505;ENSBTAG00000012137;ENSBTAG00000012293;ENSBTAG00000013271;ENSBTAG00000017771;ENSBTAG00000021938;ENSBTAG00000035706;ENSBTAG00000040489;ENSBTAG00000049618;ENSBTAG00000052671	FAM83G;RABEP1;NTN1;SPAG9;NCOR1;EPN2;ARHGAP44;MYOCD;LOC516101;LOC511136
GO:0050794	regulation of cellular process	11	9861	0.267898	ENSBTAG00000003705;ENSBTAG00000011505;ENSBTAG00000012137;ENSBTAG00000012293;ENSBTAG00000013271;ENSBTAG00000017771;ENSBTAG00000021938;ENSBTAG00000035706;ENSBTAG00000040489;ENSBTAG00000049618;ENSBTAG00000052671	FAM83G;RABEP1;NTN1;SPAG9;NCOR1;EPN2;ARHGAP44;MYOCD;LOC516101;LOC511136
GO:0019222	regulation of metabolic process	8	5770	0.136134	ENSBTAG00000003705;ENSBTAG00000011505;ENSBTAG00000012293;ENSBTAG00000013271;ENSBTAG00000018488;ENSBTAG00000021938;ENSBTAG00000031679;ENSBTAG00000035706	FAM83G;RABEP1;SPAG9;NCOR1;AFF1;ARHGAP44;HSD17B13;MYOCD
GO:0007165	signal transduction	10	5307	0.00947704	ENSBTAG00000003705;ENSBTAG00000011505;ENSBTAG00000012293;ENSBTAG00000013271;ENSBTAG00000017771;ENSBTAG00000021938;ENSBTAG00000035706;ENSBTAG00000040489;ENSBTAG00000049618;ENSBTAG00000052671	FAM83G;RABEP1;SPAG9;NCOR1;EPN2;ARHGAP44;MYOCD;LOC516101;LOC511136
GO:0044700	single organism signaling	10	5629	0.0148321	ENSBTAG00000003705;ENSBTAG00000011505;ENSBTAG00000012293;ENSBTAG00000013271;ENSBTAG00000017771;ENSBTAG00000021938;ENSBTAG00000035706;ENSBTAG00000040489;ENSBTAG00000049618;ENSBTAG00000052671	FAM83G;RABEP1;SPAG9;NCOR1;EPN2;ARHGAP44;MYOCD;LOC516101;LOC511136
GO:0023052	signaling	10	5640	0.0150509	ENSBTAG00000003705;ENSBTAG00000011505;ENSBTAG00000012293;ENSBTAG00000013271;ENSBTAG00000017771;ENSBTAG00000021938;ENSBTAG00000035706;ENSBTAG00000040489;ENSBTAG00000049618;ENSBTAG00000052671	FAM83G;RABEP1;SPAG9;NCOR1;EPN2;ARHGAP44;MYOCD;LOC516101;LOC511136
GO:0007154	cell communication	10	5716	0.016635	ENSBTAG00000003705;ENSBTAG00000011505;ENSBTAG00000012293;ENSBTAG00000013271;ENSBTAG00000017771;ENSBTAG00000021938;ENSBTAG00000035706;ENSBTAG00000040489;ENSBTAG00000049618;ENSBTAG00000052671	FAM83G;RABEP1;SPAG9;NCOR1;EPN2;ARHGAP44;MYOCD;LOC516101;LOC511136
GO:0060255	regulation of macromolecule metabolic process	5	5026	0.532078	ENSBTAG00000003705;ENSBTAG00000012293;ENSBTAG00000013271;ENSBTAG00000018488;ENSBTAG00000035706	FAM83G;SPAG9;NCOR1;AFF1;MYOCD
GO:0080090	regulation of primary metabolic process	5	4946	0.515391	ENSBTAG00000003705;ENSBTAG00000012293;ENSBTAG00000013271;ENSBTAG00000031679;ENSBTAG00000035706	FAM83G;SPAG9;NCOR1;HSD17B13;MYOCD
GO:0031323	regulation of cellular metabolic process	4	5004	0.736383	ENSBTAG00000003705;ENSBTAG00000012293;ENSBTAG00000013271;ENSBTAG00000035706	FAM83G;SPAG9;NCOR1;MYOCD
GO:0046889	positive regulation of lipid biosynthetic process	1	52	0.0477314	ENSBTAG00000031679	HSD17B13
GO:0045834	positive regulation of lipid metabolic process	1	103	0.0924634	ENSBTAG00000031679	HSD17B13
GO:0046890	regulation of lipid biosynthetic process	1	115	0.102698	ENSBTAG00000031679	HSD17B13
GO:0008610	lipid biosynthetic process	1	455	0.351506	ENSBTAG00000031679	HSD17B13
GO:0006511	ubiquitin-dependent protein catabolic process	1	542	0.403852	ENSBTAG00000002455	KLHL8
GO:0019941	modification-dependent protein catabolic process	1	553	0.410181	ENSBTAG00000002455	KLHL8
GO:0043632	modification-dependent macromolecule catabolic process	1	558	0.413037	ENSBTAG00000002455	KLHL8
GO:0051603	proteolysis involved in cellular protein catabolic process	1	625	0.450077	ENSBTAG00000002455	KLHL8
GO:0044257	cellular protein catabolic process	1	650	0.463327	ENSBTAG00000002455	KLHL8
GO:0016567	protein ubiquitination	1	677	0.477302	ENSBTAG00000002455	KLHL8
GO:0032446	protein modification by small protein conjugation	1	731	0.504232	ENSBTAG00000002455	KLHL8
GO:0030163	protein catabolic process	1	780	0.527539	ENSBTAG00000002455	KLHL8
GO:0044265	cellular macromolecule catabolic process	1	819	0.54535	ENSBTAG00000002455	KLHL8
GO:0070647	protein modification by small protein conjugation or removal	1	847	0.557748	ENSBTAG00000002455	KLHL8
GO:0009057	macromolecule catabolic process	1	982	0.613199	ENSBTAG00000002455	KLHL8
GO:0006508	proteolysis	1	1557	0.784193	ENSBTAG00000002455	KLHL8
GO:0008152	metabolic process	10	10579	0.595163	ENSBTAG00000002455;ENSBTAG00000003705;ENSBTAG00000011505;ENSBTAG00000012293;ENSBTAG00000013271;ENSBTAG00000015294;ENSBTAG00000018488;ENSBTAG00000021938;ENSBTAG00000031679;ENSBTAG00000035706	KLHL8;FAM83G;RABEP1;SPAG9;NCOR1;COX10;AFF1;ARHGAP44;HSD17B13;MYOCD
GO:0043170	macromolecule metabolic process	6	8346	0.879075	ENSBTAG00000002455;ENSBTAG00000003705;ENSBTAG00000012293;ENSBTAG00000013271;ENSBTAG00000018488;ENSBTAG00000035706	KLHL8;FAM83G;SPAG9;NCOR1;AFF1;MYOCD
GO:0071704	organic substance metabolic process	8	9800	0.805611	ENSBTAG00000002455;ENSBTAG00000003705;ENSBTAG00000012293;ENSBTAG00000013271;ENSBTAG00000015294;ENSBTAG00000018488;ENSBTAG00000031679;ENSBTAG00000035706	KLHL8;FAM83G;SPAG9;NCOR1;COX10;AFF1;HSD17B13;MYOCD
GO:0044237	cellular metabolic process	6	9227	0.943907	ENSBTAG00000002455;ENSBTAG00000003705;ENSBTAG00000012293;ENSBTAG00000013271;ENSBTAG00000015294;ENSBTAG00000035706	KLHL8;FAM83G;SPAG9;NCOR1;COX10;MYOCD
GO:0044238	primary metabolic process	6	9407	0.952992	ENSBTAG00000002455;ENSBTAG00000003705;ENSBTAG00000012293;ENSBTAG00000013271;ENSBTAG00000031679;ENSBTAG00000035706	KLHL8;FAM83G;SPAG9;NCOR1;HSD17B13;MYOCD
GO:0044260	cellular macromolecule metabolic process	5	7590	0.908765	ENSBTAG00000002455;ENSBTAG00000003705;ENSBTAG00000012293;ENSBTAG00000013271;ENSBTAG00000035706	KLHL8;FAM83G;SPAG9;NCOR1;MYOCD
GO:0044248	cellular catabolic process	2	1472	0.407826	ENSBTAG00000002455;ENSBTAG00000013271	KLHL8;NCOR1
GO:1901575	organic substance catabolic process	2	1534	0.428973	ENSBTAG00000002455;ENSBTAG00000013271	KLHL8;NCOR1
GO:0009056	catabolic process	2	1776	0.508118	ENSBTAG00000002455;ENSBTAG00000013271	KLHL8;NCOR1
GO:0008150	biological_process	16	17045	1	ENSBTAG00000002455;ENSBTAG00000003700;ENSBTAG00000003705;ENSBTAG00000011505;ENSBTAG00000012137;ENSBTAG00000012293;ENSBTAG00000013271;ENSBTAG00000015294;ENSBTAG00000017771;ENSBTAG00000018488;ENSBTAG00000021938;ENSBTAG00000031679;ENSBTAG00000035706;ENSBTAG00000040489;ENSBTAG00000049618;ENSBTAG00000052671	KLHL8;SLC5A10;FAM83G;RABEP1;NTN1;SPAG9;NCOR1;COX10;EPN2;AFF1;ARHGAP44;HSD17B13;MYOCD;LOC516101;LOC511136
GO:0009987	cellular process	14	15468	0.820546	ENSBTAG00000002455;ENSBTAG00000003700;ENSBTAG00000003705;ENSBTAG00000011505;ENSBTAG00000012137;ENSBTAG00000012293;ENSBTAG00000013271;ENSBTAG00000015294;ENSBTAG00000017771;ENSBTAG00000021938;ENSBTAG00000035706;ENSBTAG00000040489;ENSBTAG00000049618;ENSBTAG00000052671	KLHL8;SLC5A10;FAM83G;RABEP1;NTN1;SPAG9;NCOR1;COX10;EPN2;ARHGAP44;MYOCD;LOC516101;LOC511136
GO:0006464	cellular protein modification process	4	3370	0.392705	ENSBTAG00000002455;ENSBTAG00000012293;ENSBTAG00000013271;ENSBTAG00000035706	KLHL8;SPAG9;NCOR1;MYOCD
GO:0036211	protein modification process	4	3370	0.392705	ENSBTAG00000002455;ENSBTAG00000012293;ENSBTAG00000013271;ENSBTAG00000035706	KLHL8;SPAG9;NCOR1;MYOCD
GO:0043412	macromolecule modification	4	3525	0.429095	ENSBTAG00000002455;ENSBTAG00000012293;ENSBTAG00000013271;ENSBTAG00000035706	KLHL8;SPAG9;NCOR1;MYOCD
GO:0044267	cellular protein metabolic process	4	4427	0.629433	ENSBTAG00000002455;ENSBTAG00000012293;ENSBTAG00000013271;ENSBTAG00000035706	KLHL8;SPAG9;NCOR1;MYOCD
GO:0019538	protein metabolic process	4	5079	0.748717	ENSBTAG00000002455;ENSBTAG00000012293;ENSBTAG00000013271;ENSBTAG00000035706	KLHL8;SPAG9;NCOR1;MYOCD
GO:0007186	G-protein coupled receptor signaling pathway	2	1761	0.503388	ENSBTAG00000040489;ENSBTAG00000052671	LOC516101;LOC511136
GO:1900239	regulation of phenotypic switching	1	1	0.000938692	ENSBTAG00000035706	MYOCD
GO:0001560	regulation of cell growth by extracellular stimulus	1	2	0.00187656	ENSBTAG00000035706	MYOCD
GO:0036166	phenotypic switching	1	2	0.00187656	ENSBTAG00000035706	MYOCD
GO:2000587	negative regulation of platelet-derived growth factor receptor-beta signaling pathway	1	2	0.00187656	ENSBTAG00000035706	MYOCD
GO:2000721	positive regulation of transcription from RNA polymerase II promoter involved in smooth muscle cell differentiation	1	2	0.00187656	ENSBTAG00000035706	MYOCD
GO:0060157	urinary bladder development	1	3	0.0028136	ENSBTAG00000035706	MYOCD
GO:0003257	positive regulation of transcription from RNA polymerase II promoter involved in myocardial precursor cell differentiation	1	4	0.00374981	ENSBTAG00000035706	MYOCD
GO:0051152	positive regulation of smooth muscle cell differentiation	1	4	0.00374981	ENSBTAG00000035706	MYOCD
GO:1904753	negative regulation of vascular associated smooth muscle cell migration	1	4	0.00374981	ENSBTAG00000035706	MYOCD
GO:2001015	negative regulation of skeletal muscle cell differentiation	1	4	0.00374981	ENSBTAG00000035706	MYOCD
GO:0060354	negative regulation of cell adhesion molecule production	1	5	0.0046852	ENSBTAG00000035706	MYOCD
GO:0097070	ductus arteriosus closure	1	5	0.0046852	ENSBTAG00000035706	MYOCD
GO:1901228	positive regulation of transcription from RNA polymerase II promoter involved in heart development	1	5	0.0046852	ENSBTAG00000035706	MYOCD
GO:0003256	regulation of transcription from RNA polymerase II promoter involved in myocardial precursor cell differentiation	1	6	0.00561977	ENSBTAG00000035706	MYOCD
GO:1900222	negative regulation of beta-amyloid clearance	1	6	0.00561977	ENSBTAG00000035706	MYOCD
GO:2000586	regulation of platelet-derived growth factor receptor-beta signaling pathway	1	6	0.00561977	ENSBTAG00000035706	MYOCD
GO:1903800	positive regulation of production of miRNAs involved in gene silencing by miRNA	1	8	0.00748644	ENSBTAG00000035706	MYOCD
GO:2000727	positive regulation of cardiac muscle cell differentiation	1	8	0.00748644	ENSBTAG00000035706	MYOCD
GO:0060353	regulation of cell adhesion molecule production	1	9	0.00841854	ENSBTAG00000035706	MYOCD
GO:0060379	cardiac muscle cell myoblast differentiation	1	9	0.00841854	ENSBTAG00000035706	MYOCD
GO:1900221	regulation of beta-amyloid clearance	1	9	0.00841854	ENSBTAG00000035706	MYOCD
GO:0010642	negative regulation of platelet-derived growth factor receptor signaling pathway	1	10	0.00934982	ENSBTAG00000035706	MYOCD
GO:0010667	negative regulation of cardiac muscle cell apoptotic process	1	10	0.00934982	ENSBTAG00000035706	MYOCD
GO:0035791	platelet-derived growth factor receptor-beta signaling pathway	1	10	0.00934982	ENSBTAG00000035706	MYOCD
GO:0048642	negative regulation of skeletal muscle tissue development	1	10	0.00934982	ENSBTAG00000035706	MYOCD
GO:0055012	ventricular cardiac muscle cell differentiation	1	10	0.00934982	ENSBTAG00000035706	MYOCD
GO:1904706	negative regulation of vascular smooth muscle cell proliferation	1	10	0.00934982	ENSBTAG00000035706	MYOCD
GO:0010664	negative regulation of striated muscle cell apoptotic process	1	11	0.0102803	ENSBTAG00000035706	MYOCD
GO:0010832	negative regulation of myotube differentiation	1	11	0.0102803	ENSBTAG00000035706	MYOCD
GO:0060352	cell adhesion molecule production	1	11	0.0102803	ENSBTAG00000035706	MYOCD
GO:1904752	regulation of vascular associated smooth muscle cell migration	1	11	0.0102803	ENSBTAG00000035706	MYOCD
GO:0010659	cardiac muscle cell apoptotic process	1	12	0.0112099	ENSBTAG00000035706	MYOCD
GO:0010665	regulation of cardiac muscle cell apoptotic process	1	12	0.0112099	ENSBTAG00000035706	MYOCD
GO:0014912	negative regulation of smooth muscle cell migration	1	12	0.0112099	ENSBTAG00000035706	MYOCD
GO:0035886	vascular smooth muscle cell differentiation	1	12	0.0112099	ENSBTAG00000035706	MYOCD
GO:0051150	regulation of smooth muscle cell differentiation	1	12	0.0112099	ENSBTAG00000035706	MYOCD
GO:1901213	regulation of transcription from RNA polymerase II promoter involved in heart development	1	12	0.0112099	ENSBTAG00000035706	MYOCD
GO:1904738	vascular associated smooth muscle cell migration	1	12	0.0112099	ENSBTAG00000035706	MYOCD
GO:0010658	striated muscle cell apoptotic process	1	13	0.0121387	ENSBTAG00000035706	MYOCD
GO:0010662	regulation of striated muscle cell apoptotic process	1	13	0.0121387	ENSBTAG00000035706	MYOCD
GO:0010002	cardioblast differentiation	1	14	0.0130668	ENSBTAG00000035706	MYOCD
GO:0045987	positive regulation of smooth muscle contraction	1	15	0.0139939	ENSBTAG00000035706	MYOCD
GO:2000725	regulation of cardiac muscle cell differentiation	1	15	0.0139939	ENSBTAG00000035706	MYOCD
GO:2001014	regulation of skeletal muscle cell differentiation	1	15	0.0139939	ENSBTAG00000035706	MYOCD
GO:0097242	beta-amyloid clearance	1	16	0.0149203	ENSBTAG00000035706	MYOCD
GO:0010656	negative regulation of muscle cell apoptotic process	1	17	0.0158459	ENSBTAG00000035706	MYOCD
GO:0060065	uterus development	1	19	0.0176945	ENSBTAG00000035706	MYOCD
GO:2000637	positive regulation of gene silencing by miRNA	1	19	0.0176945	ENSBTAG00000035706	MYOCD
GO:0060148	positive regulation of posttranscriptional gene silencing	1	20	0.0186176	ENSBTAG00000035706	MYOCD
GO:0010640	regulation of platelet-derived growth factor receptor signaling pathway	1	21	0.0195399	ENSBTAG00000035706	MYOCD
GO:0045736	negative regulation of cyclin-dependent protein serine/threonine kinase activity	1	21	0.0195399	ENSBTAG00000035706	MYOCD
GO:0051154	negative regulation of striated muscle cell differentiation	1	22	0.0204614	ENSBTAG00000035706	MYOCD
GO:1904030	negative regulation of cyclin-dependent protein kinase activity	1	22	0.0204614	ENSBTAG00000035706	MYOCD
GO:0045933	positive regulation of muscle contraction	1	23	0.0213821	ENSBTAG00000035706	MYOCD
GO:0014910	regulation of smooth muscle cell migration	1	24	0.022302	ENSBTAG00000035706	MYOCD
GO:0030511	positive regulation of transforming growth factor beta receptor signaling pathway	1	24	0.022302	ENSBTAG00000035706	MYOCD
GO:0048662	negative regulation of smooth muscle cell proliferation	1	24	0.022302	ENSBTAG00000035706	MYOCD
GO:1903846	positive regulation of cellular response to transforming growth factor beta stimulus	1	24	0.022302	ENSBTAG00000035706	MYOCD
GO:0010657	muscle cell apoptotic process	1	25	0.023221	ENSBTAG00000035706	MYOCD
GO:0010660	regulation of muscle cell apoptotic process	1	25	0.023221	ENSBTAG00000035706	MYOCD
GO:0055025	positive regulation of cardiac muscle tissue development	1	25	0.023221	ENSBTAG00000035706	MYOCD
GO:0045843	negative regulation of striated muscle tissue development	1	28	0.0259733	ENSBTAG00000035706	MYOCD
GO:0048635	negative regulation of muscle organ development	1	29	0.0268891	ENSBTAG00000035706	MYOCD
GO:0014909	smooth muscle cell migration	1	30	0.0278041	ENSBTAG00000035706	MYOCD
GO:1901862	negative regulation of muscle tissue development	1	31	0.0287183	ENSBTAG00000035706	MYOCD
GO:1904705	regulation of vascular smooth muscle cell proliferation	1	31	0.0287183	ENSBTAG00000035706	MYOCD
GO:1990874	vascular smooth muscle cell proliferation	1	31	0.0287183	ENSBTAG00000035706	MYOCD
GO:0006940	regulation of smooth muscle contraction	1	32	0.0296317	ENSBTAG00000035706	MYOCD
GO:0045661	regulation of myoblast differentiation	1	36	0.0332773	ENSBTAG00000035706	MYOCD
GO:0043388	positive regulation of DNA binding	1	37	0.0341866	ENSBTAG00000035706	MYOCD
GO:0048286	lung alveolus development	1	37	0.0341866	ENSBTAG00000035706	MYOCD
GO:0048641	regulation of skeletal muscle tissue development	1	37	0.0341866	ENSBTAG00000035706	MYOCD
GO:0051145	smooth muscle cell differentiation	1	37	0.0341866	ENSBTAG00000035706	MYOCD
GO:0051155	positive regulation of striated muscle cell differentiation	1	39	0.036003	ENSBTAG00000035706	MYOCD
GO:0010830	regulation of myotube differentiation	1	40	0.03691	ENSBTAG00000035706	MYOCD
GO:0045844	positive regulation of striated muscle tissue development	1	40	0.03691	ENSBTAG00000035706	MYOCD
GO:0048636	positive regulation of muscle organ development	1	40	0.03691	ENSBTAG00000035706	MYOCD
GO:0055024	regulation of cardiac muscle tissue development	1	41	0.0378161	ENSBTAG00000035706	MYOCD
GO:1901863	positive regulation of muscle tissue development	1	41	0.0378161	ENSBTAG00000035706	MYOCD
GO:0014812	muscle cell migration	1	43	0.0396261	ENSBTAG00000035706	MYOCD
GO:0035065	regulation of histone acetylation	1	48	0.044137	ENSBTAG00000035706	MYOCD
GO:0048844	artery morphogenesis	1	48	0.044137	ENSBTAG00000035706	MYOCD
GO:0048008	platelet-derived growth factor receptor signaling pathway	1	49	0.0450368	ENSBTAG00000035706	MYOCD
GO:0051148	negative regulation of muscle cell differentiation	1	49	0.0450368	ENSBTAG00000035706	MYOCD
GO:0051149	positive regulation of muscle cell differentiation	1	50	0.0459358	ENSBTAG00000035706	MYOCD
GO:0035914	skeletal muscle cell differentiation	1	54	0.0495238	ENSBTAG00000035706	MYOCD
GO:2000756	regulation of peptidyl-lysine acetylation	1	54	0.0495238	ENSBTAG00000035706	MYOCD
GO:0001570	vasculogenesis	1	59	0.0539911	ENSBTAG00000035706	MYOCD
GO:0045445	myoblast differentiation	1	59	0.0539911	ENSBTAG00000035706	MYOCD
GO:0043954	cellular component maintenance	1	61	0.0557726	ENSBTAG00000035706	MYOCD
GO:0006939	smooth muscle contraction	1	64	0.0584388	ENSBTAG00000035706	MYOCD
GO:0048660	regulation of smooth muscle cell proliferation	1	64	0.0584388	ENSBTAG00000035706	MYOCD
GO:0051153	regulation of striated muscle cell differentiation	1	64	0.0584388	ENSBTAG00000035706	MYOCD
GO:1901983	regulation of protein acetylation	1	64	0.0584388	ENSBTAG00000035706	MYOCD
GO:0048659	smooth muscle cell proliferation	1	66	0.0602123	ENSBTAG00000035706	MYOCD
GO:0000079	regulation of cyclin-dependent protein serine/threonine kinase activity	1	67	0.0610979	ENSBTAG00000035706	MYOCD
GO:0055007	cardiac muscle cell differentiation	1	67	0.0610979	ENSBTAG00000035706	MYOCD
GO:0060840	artery development	1	67	0.0610979	ENSBTAG00000035706	MYOCD
GO:1904029	regulation of cyclin-dependent protein kinase activity	1	70	0.06375	ENSBTAG00000035706	MYOCD
GO:0016202	regulation of striated muscle tissue development	1	79	0.0716643	ENSBTAG00000035706	MYOCD
GO:0051101	regulation of DNA binding	1	81	0.0734144	ENSBTAG00000035706	MYOCD
GO:0048634	regulation of muscle organ development	1	82	0.0742884	ENSBTAG00000035706	MYOCD
GO:1901861	regulation of muscle tissue development	1	82	0.0742884	ENSBTAG00000035706	MYOCD
GO:0014902	myotube differentiation	1	84	0.0760339	ENSBTAG00000035706	MYOCD
GO:0035051	cardiocyte differentiation	1	85	0.0769055	ENSBTAG00000035706	MYOCD
GO:0090100	positive regulation of transmembrane receptor protein serine/threonine kinase signaling pathway	1	85	0.0769055	ENSBTAG00000035706	MYOCD
GO:0006937	regulation of muscle contraction	1	90	0.0812521	ENSBTAG00000035706	MYOCD
GO:0003231	cardiac ventricle development	1	93	0.0838508	ENSBTAG00000035706	MYOCD
GO:0048565	digestive tract development	1	93	0.0838508	ENSBTAG00000035706	MYOCD
GO:0071901	negative regulation of protein serine/threonine kinase activity	1	96	0.0864426	ENSBTAG00000035706	MYOCD
GO:0017015	regulation of transforming growth factor beta receptor signaling pathway	1	97	0.087305	ENSBTAG00000035706	MYOCD
GO:0055123	digestive system development	1	98	0.0881666	ENSBTAG00000035706	MYOCD
GO:1903844	regulation of cellular response to transforming growth factor beta stimulus	1	99	0.0890275	ENSBTAG00000035706	MYOCD
GO:0033002	muscle cell proliferation	1	103	0.0924634	ENSBTAG00000035706	MYOCD
GO:0051147	regulation of muscle cell differentiation	1	109	0.0975945	ENSBTAG00000035706	MYOCD
GO:0007519	skeletal muscle tissue development	1	116	0.103546	ENSBTAG00000035706	MYOCD
GO:0031056	regulation of histone modification	1	118	0.10524	ENSBTAG00000035706	MYOCD
GO:0051099	positive regulation of binding	1	119	0.106086	ENSBTAG00000035706	MYOCD
GO:0060538	skeletal muscle organ development	1	120	0.106931	ENSBTAG00000035706	MYOCD
GO:0090257	regulation of muscle system process	1	123	0.109461	ENSBTAG00000035706	MYOCD
GO:0003205	cardiac chamber development	1	124	0.110303	ENSBTAG00000035706	MYOCD
GO:0048738	cardiac muscle tissue development	1	137	0.121182	ENSBTAG00000035706	MYOCD
GO:1903308	regulation of chromatin modification	1	139	0.122844	ENSBTAG00000035706	MYOCD
GO:0016573	histone acetylation	1	140	0.123675	ENSBTAG00000035706	MYOCD
GO:0030324	lung development	1	141	0.124504	ENSBTAG00000035706	MYOCD
GO:0001666	response to hypoxia	1	143	0.126161	ENSBTAG00000035706	MYOCD
GO:0006475	internal protein amino acid acetylation	1	143	0.126161	ENSBTAG00000035706	MYOCD
GO:0018393	internal peptidyl-lysine acetylation	1	143	0.126161	ENSBTAG00000035706	MYOCD
GO:0030323	respiratory tube development	1	143	0.126161	ENSBTAG00000035706	MYOCD
GO:0036293	response to decreased oxygen levels	1	144	0.126988	ENSBTAG00000035706	MYOCD
GO:0007179	transforming growth factor beta receptor signaling pathway	1	147	0.129465	ENSBTAG00000035706	MYOCD
GO:0018394	peptidyl-lysine acetylation	1	150	0.131936	ENSBTAG00000035706	MYOCD
GO:1902275	regulation of chromatin organization	1	151	0.132758	ENSBTAG00000035706	MYOCD
GO:0070482	response to oxygen levels	1	157	0.137675	ENSBTAG00000035706	MYOCD
GO:0060541	respiratory system development	1	159	0.139308	ENSBTAG00000035706	MYOCD
GO:0031668	cellular response to extracellular stimulus	1	163	0.142566	ENSBTAG00000035706	MYOCD
GO:0006469	negative regulation of protein kinase activity	1	165	0.144191	ENSBTAG00000035706	MYOCD
GO:0071560	cellular response to transforming growth factor beta stimulus	1	174	0.151465	ENSBTAG00000035706	MYOCD
GO:0006473	protein acetylation	1	175	0.15227	ENSBTAG00000035706	MYOCD
GO:0071559	response to transforming growth factor beta	1	179	0.155482	ENSBTAG00000035706	MYOCD
GO:0033673	negative regulation of kinase activity	1	182	0.157883	ENSBTAG00000035706	MYOCD
GO:0030336	negative regulation of cell migration	1	191	0.165049	ENSBTAG00000035706	MYOCD
GO:0090092	regulation of transmembrane receptor protein serine/threonine kinase signaling pathway	1	192	0.165841	ENSBTAG00000035706	MYOCD
GO:0006936	muscle contraction	1	198	0.170583	ENSBTAG00000035706	MYOCD
GO:0051091	positive regulation of sequence-specific DNA binding transcription factor activity	1	200	0.172157	ENSBTAG00000035706	MYOCD
GO:2000146	negative regulation of cell motility	1	201	0.172944	ENSBTAG00000035706	MYOCD
GO:0071496	cellular response to external stimulus	1	202	0.173729	ENSBTAG00000035706	MYOCD
GO:0043543	protein acylation	1	211	0.180768	ENSBTAG00000035706	MYOCD
GO:0072001	renal system development	1	221	0.188524	ENSBTAG00000035706	MYOCD
GO:0007517	muscle organ development	1	223	0.190066	ENSBTAG00000035706	MYOCD
GO:0051271	negative regulation of cellular component movement	1	226	0.192375	ENSBTAG00000035706	MYOCD
GO:0051348	negative regulation of transferase activity	1	227	0.193144	ENSBTAG00000035706	MYOCD
GO:0003012	muscle system process	1	242	0.204586	ENSBTAG00000035706	MYOCD
GO:0040013	negative regulation of locomotion	1	246	0.207612	ENSBTAG00000035706	MYOCD
GO:0001655	urogenital system development	1	248	0.209121	ENSBTAG00000035706	MYOCD
GO:0051098	regulation of binding	1	248	0.209121	ENSBTAG00000035706	MYOCD
GO:0014706	striated muscle tissue development	1	252	0.21213	ENSBTAG00000035706	MYOCD
GO:0060537	muscle tissue development	1	267	0.22332	ENSBTAG00000035706	MYOCD
GO:0048863	stem cell differentiation	1	274	0.228491	ENSBTAG00000035706	MYOCD
GO:0033044	regulation of chromosome organization	1	279	0.232164	ENSBTAG00000035706	MYOCD
GO:0044057	regulation of system process	1	286	0.23728	ENSBTAG00000035706	MYOCD
GO:0051090	regulation of sequence-specific DNA binding transcription factor activity	1	308	0.25315	ENSBTAG00000035706	MYOCD
GO:0048608	reproductive structure development	1	310	0.254577	ENSBTAG00000035706	MYOCD
GO:0045786	negative regulation of cell cycle	1	311	0.25529	ENSBTAG00000035706	MYOCD
GO:0097285	cell-type specific apoptotic process	1	311	0.25529	ENSBTAG00000035706	MYOCD
GO:0061458	reproductive system development	1	312	0.256002	ENSBTAG00000035706	MYOCD
GO:0018205	peptidyl-lysine modification	1	316	0.258844	ENSBTAG00000035706	MYOCD
GO:0009991	response to extracellular stimulus	1	317	0.259553	ENSBTAG00000035706	MYOCD
GO:0007507	heart development	1	382	0.304289	ENSBTAG00000035706	MYOCD
GO:0016570	histone modification	1	406	0.320157	ENSBTAG00000035706	MYOCD
GO:0016569	covalent chromatin modification	1	418	0.327963	ENSBTAG00000035706	MYOCD
GO:0008285	negative regulation of cell proliferation	1	456	0.352131	ENSBTAG00000035706	MYOCD
GO:0003006	developmental process involved in reproduction	1	499	0.378496	ENSBTAG00000035706	MYOCD
GO:0016568	chromatin modification	1	501	0.379697	ENSBTAG00000035706	MYOCD
GO:0043066	negative regulation of apoptotic process	1	612	0.443066	ENSBTAG00000035706	MYOCD
GO:0043086	negative regulation of catalytic activity	1	615	0.444691	ENSBTAG00000035706	MYOCD
GO:0043069	negative regulation of programmed cell death	1	627	0.451148	ENSBTAG00000035706	MYOCD
GO:0009628	response to abiotic stimulus	1	660	0.468543	ENSBTAG00000035706	MYOCD
GO:0060548	negative regulation of cell death	1	680	0.478833	ENSBTAG00000035706	MYOCD
GO:0006325	chromatin organization	1	691	0.484412	ENSBTAG00000035706	MYOCD
GO:0051726	regulation of cell cycle	1	774	0.524741	ENSBTAG00000035706	MYOCD
GO:0044092	negative regulation of molecular function	1	846	0.55731	ENSBTAG00000035706	MYOCD
GO:0044702	single organism reproductive process	1	851	0.559493	ENSBTAG00000035706	MYOCD
GO:0022414	reproductive process	1	913	0.585727	ENSBTAG00000035706	MYOCD
GO:0000003	reproductive	1	916	0.586959	ENSBTAG00000035706	MYOCD
GO:0042981	regulation of apoptotic process	1	1008	0.6231	ENSBTAG00000035706	MYOCD
GO:0045944	positive regulation of transcription from RNA polymerase II promoter	1	1016	0.626099	ENSBTAG00000035706	MYOCD
GO:0043067	regulation of programmed cell death	1	1026	0.629815	ENSBTAG00000035706	MYOCD
GO:0051276	chromosome organization	1	1026	0.629815	ENSBTAG00000035706	MYOCD
GO:0018193	peptidyl-amino acid modification	1	1048	0.63787	ENSBTAG00000035706	MYOCD
GO:0010941	regulation of cell death	1	1106	0.658325	ENSBTAG00000035706	MYOCD
GO:0006915	apoptotic process	1	1210	0.692317	ENSBTAG00000035706	MYOCD
GO:0012501	programmed cell death	1	1246	0.703326	ENSBTAG00000035706	MYOCD
GO:0008219	cell death	1	1338	0.729804	ENSBTAG00000035706	MYOCD
GO:0016265	death	1	1338	0.729804	ENSBTAG00000035706	MYOCD
GO:0045893	positive regulation of transcription, DNA-templated	1	1409	0.748706	ENSBTAG00000035706	MYOCD
GO:1903508	positive regulation of nucleic acid-templated transcription	1	1409	0.748706	ENSBTAG00000035706	MYOCD
GO:1902680	positive regulation of RNA biosynthetic process	1	1413	0.749733	ENSBTAG00000035706	MYOCD
GO:0051254	positive regulation of RNA metabolic process	1	1468	0.763462	ENSBTAG00000035706	MYOCD
GO:0045935	positive regulation of nucleobase-containing compound metabolic process	1	1609	0.795504	ENSBTAG00000035706	MYOCD
GO:0003008	system process	1	2106	0.878895	ENSBTAG00000035706	MYOCD
GO:0045820	negative regulation of glycolytic process	1	12	0.0112099	ENSBTAG00000013271	NCOR1
GO:1903799	negative regulation of production of miRNAs involved in gene silencing by miRNA	1	12	0.0112099	ENSBTAG00000013271	NCOR1
GO:0030812	negative regulation of nucleotide catabolic process	1	13	0.0121387	ENSBTAG00000013271	NCOR1
GO:0051195	negative regulation of cofactor metabolic process	1	13	0.0121387	ENSBTAG00000013271	NCOR1
GO:0051198	negative regulation of coenzyme metabolic process	1	13	0.0121387	ENSBTAG00000013271	NCOR1
GO:0060766	negative regulation of androgen receptor signaling pathway	1	14	0.0130668	ENSBTAG00000013271	NCOR1
GO:0060965	negative regulation of gene silencing by miRNA	1	15	0.0139939	ENSBTAG00000013271	NCOR1
GO:0060149	negative regulation of posttranscriptional gene silencing	1	17	0.0158459	ENSBTAG00000013271	NCOR1
GO:0060967	negative regulation of gene silencing by RNA	1	17	0.0158459	ENSBTAG00000013271	NCOR1
GO:0046329	negative regulation of JNK cascade	1	19	0.0176945	ENSBTAG00000013271	NCOR1
GO:0045922	negative regulation of fatty acid metabolic process	1	22	0.0204614	ENSBTAG00000013271	NCOR1
GO:0045978	negative regulation of nucleoside metabolic process	1	23	0.0213821	ENSBTAG00000013271	NCOR1
GO:0060765	regulation of androgen receptor signaling pathway	1	23	0.0213821	ENSBTAG00000013271	NCOR1
GO:1903579	negative regulation of ATP metabolic process	1	23	0.0213821	ENSBTAG00000013271	NCOR1
GO:0032873	negative regulation of stress-activated MAPK cascade	1	27	0.0250567	ENSBTAG00000013271	NCOR1
GO:0070303	negative regulation of stress-activated protein kinase signaling cascade	1	27	0.0250567	ENSBTAG00000013271	NCOR1
GO:0033144	negative regulation of intracellular steroid hormone receptor signaling pathway	1	30	0.0278041	ENSBTAG00000013271	NCOR1
GO:0060969	negative regulation of gene silencing	1	30	0.0278041	ENSBTAG00000013271	NCOR1
GO:0010677	negative regulation of cellular carbohydrate metabolic process	1	31	0.0287183	ENSBTAG00000013271	NCOR1
GO:0006110	regulation of glycolytic process	1	34	0.0314561	ENSBTAG00000013271	NCOR1
GO:0030521	androgen receptor signaling pathway	1	34	0.0314561	ENSBTAG00000013271	NCOR1
GO:0030811	regulation of nucleotide catabolic process	1	35	0.0323671	ENSBTAG00000013271	NCOR1
GO:0045980	negative regulation of nucleotide metabolic process	1	35	0.0323671	ENSBTAG00000013271	NCOR1
GO:1900543	negative regulation of purine nucleotide metabolic process	1	35	0.0323671	ENSBTAG00000013271	NCOR1
GO:0043471	regulation of cellular carbohydrate catabolic process	1	36	0.0332773	ENSBTAG00000013271	NCOR1
GO:0043470	regulation of carbohydrate catabolic process	1	37	0.0341866	ENSBTAG00000013271	NCOR1
GO:0045912	negative regulation of carbohydrate metabolic process	1	41	0.0378161	ENSBTAG00000013271	NCOR1
GO:0051196	regulation of coenzyme metabolic process	1	43	0.0396261	ENSBTAG00000013271	NCOR1
GO:0051193	regulation of cofactor metabolic process	1	44	0.0405298	ENSBTAG00000013271	NCOR1
GO:0033143	regulation of intracellular steroid hormone receptor signaling pathway	1	57	0.0522066	ENSBTAG00000013271	NCOR1
GO:0044275	cellular carbohydrate catabolic process	1	58	0.0530993	ENSBTAG00000013271	NCOR1
GO:0006096	glycolytic process	1	65	0.0593259	ENSBTAG00000013271	NCOR1
GO:0006757	ATP generation from ADP	1	65	0.0593259	ENSBTAG00000013271	NCOR1
GO:0009118	regulation of nucleoside metabolic process	1	65	0.0593259	ENSBTAG00000013271	NCOR1
GO:0019217	regulation of fatty acid metabolic process	1	65	0.0593259	ENSBTAG00000013271	NCOR1
GO:1903578	regulation of ATP metabolic process	1	65	0.0593259	ENSBTAG00000013271	NCOR1
GO:0045833	negative regulation of lipid metabolic process	1	67	0.0610979	ENSBTAG00000013271	NCOR1
GO:0046031	ADP metabolic process	1	72	0.0655142	ENSBTAG00000013271	NCOR1
GO:0009135	purine nucleoside diphosphate metabolic process	1	78	0.070788	ENSBTAG00000013271	NCOR1
GO:0009179	purine ribonucleoside diphosphate metabolic process	1	78	0.070788	ENSBTAG00000013271	NCOR1
GO:0009166	nucleotide catabolic process	1	81	0.0734144	ENSBTAG00000013271	NCOR1
GO:0009185	ribonucleoside diphosphate metabolic process	1	81	0.0734144	ENSBTAG00000013271	NCOR1
GO:0006165	nucleoside diphosphate phosphorylation	1	83	0.0751615	ENSBTAG00000013271	NCOR1
GO:0030518	intracellular steroid hormone receptor signaling pathway	1	84	0.0760339	ENSBTAG00000013271	NCOR1
GO:0046939	nucleotide phosphorylation	1	84	0.0760339	ENSBTAG00000013271	NCOR1
GO:0006090	pyruvate metabolic process	1	86	0.0777764	ENSBTAG00000013271	NCOR1
GO:0043467	regulation of generation of precursor metabolites and energy	1	89	0.0803843	ENSBTAG00000013271	NCOR1
GO:0051225	spindle assembly	1	91	0.0821191	ENSBTAG00000013271	NCOR1
GO:1901292	nucleoside phosphate catabolic process	1	91	0.0821191	ENSBTAG00000013271	NCOR1
GO:0010565	regulation of cellular ketone metabolic process	1	95	0.0855794	ENSBTAG00000013271	NCOR1
GO:0045727	positive regulation of translation	1	96	0.0864426	ENSBTAG00000013271	NCOR1
GO:0043401	steroid hormone mediated signaling pathway	1	98	0.0881666	ENSBTAG00000013271	NCOR1
GO:1900542	regulation of purine nucleotide metabolic process	1	98	0.0881666	ENSBTAG00000013271	NCOR1
GO:0006140	regulation of nucleotide metabolic process	1	100	0.0898876	ENSBTAG00000013271	NCOR1
GO:0044724	single-organism carbohydrate catabolic process	1	100	0.0898876	ENSBTAG00000013271	NCOR1
GO:0009132	nucleoside diphosphate metabolic process	1	101	0.090747	ENSBTAG00000013271	NCOR1
GO:0016052	carbohydrate catabolic process	1	103	0.0924634	ENSBTAG00000013271	NCOR1
GO:0019362	pyridine nucleotide metabolic process	1	104	0.0933205	ENSBTAG00000013271	NCOR1
GO:0046496	nicotinamide nucleotide metabolic process	1	104	0.0933205	ENSBTAG00000013271	NCOR1
GO:0072524	pyridine-containing compound metabolic process	1	108	0.0967412	ENSBTAG00000013271	NCOR1
GO:0034250	positive regulation of cellular amide metabolic process	1	113	0.101	ENSBTAG00000013271	NCOR1
GO:0043409	negative regulation of MAPK cascade	1	118	0.10524	ENSBTAG00000013271	NCOR1
GO:0006733	oxidoreduction coenzyme metabolic process	1	120	0.106931	ENSBTAG00000013271	NCOR1
GO:0010675	regulation of cellular carbohydrate metabolic process	1	131	0.116177	ENSBTAG00000013271	NCOR1
GO:0006109	regulation of carbohydrate metabolic process	1	137	0.121182	ENSBTAG00000013271	NCOR1
GO:0009755	hormone-mediated signaling pathway	1	137	0.121182	ENSBTAG00000013271	NCOR1
GO:0046434	organophosphate catabolic process	1	145	0.127814	ENSBTAG00000013271	NCOR1
GO:0007051	spindle organization	1	150	0.131936	ENSBTAG00000013271	NCOR1
GO:0071383	cellular response to steroid hormone stimulus	1	150	0.131936	ENSBTAG00000013271	NCOR1
GO:0042180	cellular ketone metabolic process	1	156	0.136857	ENSBTAG00000013271	NCOR1
GO:0031330	negative regulation of cellular catabolic process	1	168	0.146622	ENSBTAG00000013271	NCOR1
GO:0048545	response to steroid hormone	1	191	0.165049	ENSBTAG00000013271	NCOR1
GO:0030522	intracellular receptor signaling pathway	1	193	0.166633	ENSBTAG00000013271	NCOR1
GO:0046034	ATP metabolic process	1	209	0.179209	ENSBTAG00000013271	NCOR1
GO:0009895	negative regulation of catabolic process	1	214	0.183102	ENSBTAG00000013271	NCOR1
GO:0009205	purine ribonucleoside triphosphate metabolic process	1	226	0.192375	ENSBTAG00000013271	NCOR1
GO:0009144	purine nucleoside triphosphate metabolic process	1	230	0.195444	ENSBTAG00000013271	NCOR1
GO:0009199	ribonucleoside triphosphate metabolic process	1	233	0.197739	ENSBTAG00000013271	NCOR1
GO:0009167	purine ribonucleoside monophosphate metabolic process	1	242	0.204586	ENSBTAG00000013271	NCOR1
GO:0006732	coenzyme metabolic process	1	243	0.205344	ENSBTAG00000013271	NCOR1
GO:0009126	purine nucleoside monophosphate metabolic process	1	243	0.205344	ENSBTAG00000013271	NCOR1
GO:0044262	cellular carbohydrate metabolic process	1	243	0.205344	ENSBTAG00000013271	NCOR1
GO:0009141	nucleoside triphosphate metabolic process	1	250	0.210627	ENSBTAG00000013271	NCOR1
GO:0009161	ribonucleoside monophosphate metabolic process	1	256	0.215129	ENSBTAG00000013271	NCOR1
GO:0034655	nucleobase-containing compound catabolic process	1	260	0.218116	ENSBTAG00000013271	NCOR1
GO:0009123	nucleoside monophosphate metabolic process	1	276	0.229962	ENSBTAG00000013271	NCOR1
GO:0006631	fatty acid metabolic process	1	287	0.238008	ENSBTAG00000013271	NCOR1
GO:0044270	cellular nitrogen compound catabolic process	1	290	0.240188	ENSBTAG00000013271	NCOR1
GO:0046700	heterocycle catabolic process	1	293	0.242363	ENSBTAG00000013271	NCOR1
GO:0046128	purine ribonucleoside metabolic process	1	296	0.244532	ENSBTAG00000013271	NCOR1
GO:0019439	aromatic compound catabolic process	1	299	0.246695	ENSBTAG00000013271	NCOR1
GO:0042278	purine nucleoside metabolic process	1	300	0.247415	ENSBTAG00000013271	NCOR1
GO:0009119	ribonucleoside metabolic process	1	316	0.258844	ENSBTAG00000013271	NCOR1
GO:1901361	organic cyclic compound catabolic process	1	324	0.264497	ENSBTAG00000013271	NCOR1
GO:0071396	cellular response to lipid	1	332	0.270109	ENSBTAG00000013271	NCOR1
GO:0009116	nucleoside metabolic process	1	333	0.270808	ENSBTAG00000013271	NCOR1
GO:0009150	purine ribonucleotide metabolic process	1	349	0.281903	ENSBTAG00000013271	NCOR1
GO:1901657	glycosyl compound metabolic process	1	356	0.286707	ENSBTAG00000013271	NCOR1
GO:0006163	purine nucleotide metabolic process	1	359	0.288757	ENSBTAG00000013271	NCOR1
GO:0009259	ribonucleotide metabolic process	1	365	0.29284	ENSBTAG00000013271	NCOR1
GO:0019693	ribose phosphate metabolic process	1	377	0.30094	ENSBTAG00000013271	NCOR1
GO:0032870	cellular response to hormone stimulus	1	380	0.302951	ENSBTAG00000013271	NCOR1
GO:0072521	purine-containing compound metabolic process	1	396	0.313587	ENSBTAG00000013271	NCOR1
GO:0032787	monocarboxylic acid metabolic process	1	443	0.343956	ENSBTAG00000013271	NCOR1
GO:0009117	nucleotide metabolic process	1	452	0.349626	ENSBTAG00000013271	NCOR1
GO:0009725	response to hormone	1	458	0.35338	ENSBTAG00000013271	NCOR1
GO:0033993	response to lipid	1	458	0.35338	ENSBTAG00000013271	NCOR1
GO:0006753	nucleoside phosphate metabolic process	1	463	0.356493	ENSBTAG00000013271	NCOR1
GO:0055086	nucleobase-containing small molecule metabolic process	1	502	0.380297	ENSBTAG00000013271	NCOR1
GO:0031329	regulation of cellular catabolic process	1	508	0.383885	ENSBTAG00000013271	NCOR1
GO:0000226	microtubule cytoskeleton organization	1	534	0.39921	ENSBTAG00000013271	NCOR1
GO:0070925	organelle assembly	1	539	0.402115	ENSBTAG00000013271	NCOR1
GO:0044723	single-organism carbohydrate metabolic process	1	555	0.411325	ENSBTAG00000013271	NCOR1
GO:0009894	regulation of catabolic process	1	620	0.44739	ENSBTAG00000013271	NCOR1
GO:0005975	carbohydrate metabolic process	1	637	0.456475	ENSBTAG00000013271	NCOR1
GO:0007017	microtubule-based process	1	701	0.489436	ENSBTAG00000013271	NCOR1
GO:0019752	carboxylic acid metabolic process	1	743	0.510038	ENSBTAG00000013271	NCOR1
GO:0044712	single-organism catabolic process	1	752	0.51435	ENSBTAG00000013271	NCOR1
GO:0043436	oxoacid metabolic process	1	802	0.537665	ENSBTAG00000013271	NCOR1
GO:0006082	organic acid metabolic process	1	822	0.546694	ENSBTAG00000013271	NCOR1
GO:0044255	cellular lipid metabolic process	1	825	0.548034	ENSBTAG00000013271	NCOR1
GO:0019637	organophosphate metabolic process	1	837	0.553357	ENSBTAG00000013271	NCOR1
GO:1901135	carbohydrate derivative metabolic process	1	947	0.599485	ENSBTAG00000013271	NCOR1
GO:0022402	cell cycle process	1	963	0.60581	ENSBTAG00000013271	NCOR1
GO:0044281	small molecule metabolic process	1	1558	0.784416	ENSBTAG00000013271	NCOR1
GO:1902532	negative regulation of intracellular signal transduction	2	406	0.0545009	ENSBTAG00000013271;ENSBTAG00000021938	NCOR1;ARHGAP44
GO:0007010	cytoskeleton organization	2	1173	0.302576	ENSBTAG00000013271;ENSBTAG00000021938	NCOR1;ARHGAP44
GO:1902589	single-organism organelle organization	3	2267	0.360049	ENSBTAG00000013271;ENSBTAG00000021938;ENSBTAG00000035706	NCOR1;ARHGAP44;MYOCD
GO:0051186	cofactor metabolic process	2	286	0.0288344	ENSBTAG00000013271;ENSBTAG00000015294	NCOR1;COX10
GO:0006091	generation of precursor metabolites and energy	2	304	0.0322677	ENSBTAG00000013271;ENSBTAG00000015294	NCOR1;COX10
GO:0006461	protein complex assembly	2	1067	0.264704	ENSBTAG00000013271;ENSBTAG00000015294	NCOR1;COX10
GO:0070271	protein complex biogenesis	2	1067	0.264704	ENSBTAG00000013271;ENSBTAG00000015294	NCOR1;COX10
GO:0065003	macromolecular complex assembly	2	1399	0.382559	ENSBTAG00000013271;ENSBTAG00000015294	NCOR1;COX10
GO:0071822	protein complex subunit organization	2	1466	0.405764	ENSBTAG00000013271;ENSBTAG00000015294	NCOR1;COX10
GO:0006996	organelle organization	4	3210	0.355221	ENSBTAG00000013271;ENSBTAG00000015294;ENSBTAG00000021938;ENSBTAG00000035706	NCOR1;COX10;ARHGAP44;MYOCD
GO:1901566	organonitrogen compound biosynthetic process	3	1172	0.0928517	ENSBTAG00000013271;ENSBTAG00000015294;ENSBTAG00000035706	NCOR1;COX10;MYOCD
GO:1901564	organonitrogen compound metabolic process	3	1837	0.244552	ENSBTAG00000013271;ENSBTAG00000015294;ENSBTAG00000035706	NCOR1;COX10;MYOCD
GO:0043933	macromolecular complex subunit organization	3	2269	0.360595	ENSBTAG00000013271;ENSBTAG00000015294;ENSBTAG00000035706	NCOR1;COX10;MYOCD
GO:0009968	negative regulation of signal transduction	4	910	0.00876986	ENSBTAG00000013271;ENSBTAG00000017771;ENSBTAG00000021938;ENSBTAG00000035706	NCOR1;EPN2;ARHGAP44;MYOCD
GO:0023057	negative regulation of signaling	4	969	0.0109029	ENSBTAG00000013271;ENSBTAG00000017771;ENSBTAG00000021938;ENSBTAG00000035706	NCOR1;EPN2;ARHGAP44;MYOCD
GO:0010648	negative regulation of cell communication	4	991	0.0117787	ENSBTAG00000013271;ENSBTAG00000017771;ENSBTAG00000021938;ENSBTAG00000035706	NCOR1;EPN2;ARHGAP44;MYOCD
GO:0048585	negative regulation of response to stimulus	4	1211	0.0231564	ENSBTAG00000013271;ENSBTAG00000017771;ENSBTAG00000021938;ENSBTAG00000035706	NCOR1;EPN2;ARHGAP44;MYOCD
GO:0019216	regulation of lipid metabolic process	2	248	0.022122	ENSBTAG00000013271;ENSBTAG00000031679	NCOR1;HSD17B13
GO:0006629	lipid metabolic process	2	1062	0.262921	ENSBTAG00000013271;ENSBTAG00000031679	NCOR1;HSD17B13
GO:0009891	positive regulation of biosynthetic process	3	1651	0.197401	ENSBTAG00000013271;ENSBTAG00000031679;ENSBTAG00000035706	NCOR1;HSD17B13;MYOCD
GO:1903798	regulation of production of miRNAs involved in gene silencing by miRNA	2	19	0.000139957	ENSBTAG00000013271;ENSBTAG00000035706	NCOR1;MYOCD
GO:0070920	regulation of production of small RNA involved in gene silencing by RNA	2	20	0.000155423	ENSBTAG00000013271;ENSBTAG00000035706	NCOR1;MYOCD
GO:0060964	regulation of gene silencing by miRNA	2	33	0.000428849	ENSBTAG00000013271;ENSBTAG00000035706	NCOR1;MYOCD
GO:0060147	regulation of posttranscriptional gene silencing	2	36	0.000510855	ENSBTAG00000013271;ENSBTAG00000035706	NCOR1;MYOCD
GO:0060966	regulation of gene silencing by RNA	2	36	0.000510855	ENSBTAG00000013271;ENSBTAG00000035706	NCOR1;MYOCD
GO:0035196	production of miRNAs involved in gene silencing by miRNA	2	41	0.000663106	ENSBTAG00000013271;ENSBTAG00000035706	NCOR1;MYOCD
GO:0031050	dsRNA fragmentation	2	43	0.000729426	ENSBTAG00000013271;ENSBTAG00000035706	NCOR1;MYOCD
GO:0070918	production of small RNA involved in gene silencing by RNA	2	43	0.000729426	ENSBTAG00000013271;ENSBTAG00000035706	NCOR1;MYOCD
GO:0035195	gene silencing by miRNA	2	60	0.00141654	ENSBTAG00000013271;ENSBTAG00000035706	NCOR1;MYOCD
GO:0060968	regulation of gene silencing	2	60	0.00141654	ENSBTAG00000013271;ENSBTAG00000035706	NCOR1;MYOCD
GO:0071359	cellular response to dsRNA	2	60	0.00141654	ENSBTAG00000013271;ENSBTAG00000035706	NCOR1;MYOCD
GO:0035194	posttranscriptional gene silencing by RNA	2	66	0.00171102	ENSBTAG00000013271;ENSBTAG00000035706	NCOR1;MYOCD
GO:0016441	posttranscriptional gene silencing	2	70	0.00192219	ENSBTAG00000013271;ENSBTAG00000035706	NCOR1;MYOCD
GO:0031047	gene silencing by RNA	2	86	0.00288381	ENSBTAG00000013271;ENSBTAG00000035706	NCOR1;MYOCD
GO:0043331	response to dsRNA	2	102	0.00402878	ENSBTAG00000013271;ENSBTAG00000035706	NCOR1;MYOCD
GO:0017148	negative regulation of translation	2	134	0.00684886	ENSBTAG00000013271;ENSBTAG00000035706	NCOR1;MYOCD
GO:0034249	negative regulation of cellular amide metabolic process	2	148	0.00829702	ENSBTAG00000013271;ENSBTAG00000035706	NCOR1;MYOCD
GO:0016458	gene silencing	2	165	0.0102245	ENSBTAG00000013271;ENSBTAG00000035706	NCOR1;MYOCD
GO:0040029	regulation of gene expression, epigenetic	2	191	0.013519	ENSBTAG00000013271;ENSBTAG00000035706	NCOR1;MYOCD
GO:0006417	regulation of translation	2	273	0.0264546	ENSBTAG00000013271;ENSBTAG00000035706	NCOR1;MYOCD
GO:0001933	negative regulation of protein phosphorylation	2	295	0.0305313	ENSBTAG00000013271;ENSBTAG00000035706	NCOR1;MYOCD
GO:0034248	regulation of cellular amide metabolic process	2	309	0.0332492	ENSBTAG00000013271;ENSBTAG00000035706	NCOR1;MYOCD
GO:0042326	negative regulation of phosphorylation	2	331	0.0377073	ENSBTAG00000013271;ENSBTAG00000035706	NCOR1;MYOCD
GO:0071407	cellular response to organic cyclic compound	2	345	0.0406594	ENSBTAG00000013271;ENSBTAG00000035706	NCOR1;MYOCD
GO:0010608	posttranscriptional regulation of gene expression	2	348	0.0413034	ENSBTAG00000013271;ENSBTAG00000035706	NCOR1;MYOCD
GO:1901699	cellular response to nitrogen compound	2	412	0.0559437	ENSBTAG00000013271;ENSBTAG00000035706	NCOR1;MYOCD
GO:0010563	negative regulation of phosphorus metabolic process	2	446	0.0643748	ENSBTAG00000013271;ENSBTAG00000035706	NCOR1;MYOCD
GO:0045936	negative regulation of phosphate metabolic process	2	446	0.0643748	ENSBTAG00000013271;ENSBTAG00000035706	NCOR1;MYOCD
GO:0014070	response to organic cyclic compound	2	471	0.0708386	ENSBTAG00000013271;ENSBTAG00000035706	NCOR1;MYOCD
GO:0031400	negative regulation of protein modification process	2	528	0.0863439	ENSBTAG00000013271;ENSBTAG00000035706	NCOR1;MYOCD
GO:1901698	response to nitrogen compound	2	546	0.0914452	ENSBTAG00000013271;ENSBTAG00000035706	NCOR1;MYOCD
GO:0006412	translation	2	681	0.132344	ENSBTAG00000013271;ENSBTAG00000035706	NCOR1;MYOCD
GO:0043043	peptide biosynthetic process	2	697	0.137456	ENSBTAG00000013271;ENSBTAG00000035706	NCOR1;MYOCD
GO:0000122	negative regulation of transcription from RNA polymerase II promoter	2	699	0.138098	ENSBTAG00000013271;ENSBTAG00000035706	NCOR1;MYOCD
GO:0043604	amide biosynthetic process	2	770	0.16135	ENSBTAG00000013271;ENSBTAG00000035706	NCOR1;MYOCD
GO:0006396	RNA processing	2	787	0.167034	ENSBTAG00000013271;ENSBTAG00000035706	NCOR1;MYOCD
GO:0006518	peptide metabolic process	2	813	0.175803	ENSBTAG00000013271;ENSBTAG00000035706	NCOR1;MYOCD
GO:0032269	negative regulation of cellular protein metabolic process	2	889	0.201888	ENSBTAG00000013271;ENSBTAG00000035706	NCOR1;MYOCD
GO:0051248	negative regulation of protein metabolic process	2	934	0.21759	ENSBTAG00000013271;ENSBTAG00000035706	NCOR1;MYOCD
GO:0043603	cellular amide metabolic process	2	947	0.222155	ENSBTAG00000013271;ENSBTAG00000035706	NCOR1;MYOCD
GO:0045892	negative regulation of transcription, DNA-templated	2	1073	0.266845	ENSBTAG00000013271;ENSBTAG00000035706	NCOR1;MYOCD
GO:1903507	negative regulation of nucleic acid-templated transcription	2	1074	0.267202	ENSBTAG00000013271;ENSBTAG00000035706	NCOR1;MYOCD
GO:1902679	negative regulation of RNA biosynthetic process	2	1083	0.270414	ENSBTAG00000013271;ENSBTAG00000035706	NCOR1;MYOCD
GO:0051253	negative regulation of RNA metabolic process	2	1118	0.282918	ENSBTAG00000013271;ENSBTAG00000035706	NCOR1;MYOCD
GO:0045934	negative regulation of nucleobase-containing compound metabolic process	2	1227	0.321846	ENSBTAG00000013271;ENSBTAG00000035706	NCOR1;MYOCD
GO:0007049	cell cycle	2	1229	0.322558	ENSBTAG00000013271;ENSBTAG00000035706	NCOR1;MYOCD
GO:2000113	negative regulation of cellular macromolecule biosynthetic process	2	1241	0.326831	ENSBTAG00000013271;ENSBTAG00000035706	NCOR1;MYOCD
GO:0010558	negative regulation of macromolecule biosynthetic process	2	1255	0.331811	ENSBTAG00000013271;ENSBTAG00000035706	NCOR1;MYOCD
GO:0031327	negative regulation of cellular biosynthetic process	2	1299	0.347419	ENSBTAG00000013271;ENSBTAG00000035706	NCOR1;MYOCD
GO:0009890	negative regulation of biosynthetic process	2	1313	0.352369	ENSBTAG00000013271;ENSBTAG00000035706	NCOR1;MYOCD
GO:0051172	negative regulation of nitrogen compound metabolic process	2	1354	0.366812	ENSBTAG00000013271;ENSBTAG00000035706	NCOR1;MYOCD
GO:0010629	negative regulation of gene expression	2	1359	0.368567	ENSBTAG00000013271;ENSBTAG00000035706	NCOR1;MYOCD
GO:0010557	positive regulation of macromolecule biosynthetic process	2	1568	0.440434	ENSBTAG00000013271;ENSBTAG00000035706	NCOR1;MYOCD
GO:0031328	positive regulation of cellular biosynthetic process	2	1634	0.46238	ENSBTAG00000013271;ENSBTAG00000035706	NCOR1;MYOCD
GO:0051173	positive regulation of nitrogen compound metabolic process	2	1704	0.485192	ENSBTAG00000013271;ENSBTAG00000035706	NCOR1;MYOCD
GO:0010628	positive regulation of gene expression	2	1728	0.492896	ENSBTAG00000013271;ENSBTAG00000035706	NCOR1;MYOCD
GO:0010605	negative regulation of macromolecule metabolic process	2	2079	0.597999	ENSBTAG00000013271;ENSBTAG00000035706	NCOR1;MYOCD
GO:0031324	negative regulation of cellular metabolic process	2	2085	0.599665	ENSBTAG00000013271;ENSBTAG00000035706	NCOR1;MYOCD
GO:0009892	negative regulation of metabolic process	2	2267	0.648016	ENSBTAG00000013271;ENSBTAG00000035706	NCOR1;MYOCD
GO:0061643	chemorepulsion of axon	1	4	0.00374981	ENSBTAG00000012137	NTN1
GO:0033564	anterior/posterior axon guidance	1	5	0.0046852	ENSBTAG00000012137	NTN1
GO:0050803	regulation of synapse structure or activity	2	193	0.0137893	ENSBTAG00000012137;ENSBTAG00000049618	NTN1
GO:0007097	nuclear migration	1	16	0.0149203	ENSBTAG00000012137	NTN1
GO:0040023	establishment of nucleus localization	1	16	0.0149203	ENSBTAG00000012137	NTN1
GO:0045773	positive regulation of axon extension	1	19	0.0176945	ENSBTAG00000012137	NTN1
GO:0051647	nucleus localization	1	21	0.0195399	ENSBTAG00000012137	NTN1
GO:0008045	motor neuron axon guidance	1	25	0.023221	ENSBTAG00000012137	NTN1
GO:0060603	mammary gland duct morphogenesis	1	28	0.0259733	ENSBTAG00000012137	NTN1
GO:0030517	negative regulation of axon extension	1	35	0.0323671	ENSBTAG00000012137	NTN1
GO:0060443	mammary gland morphogenesis	1	40	0.03691	ENSBTAG00000012137	NTN1
GO:0050919	negative chemotaxis	1	42	0.0387215	ENSBTAG00000012137	NTN1
GO:0050771	negative regulation of axonogenesis	1	45	0.0414328	ENSBTAG00000012137	NTN1
GO:0050772	positive regulation of axonogenesis	1	53	0.048628	ENSBTAG00000012137	NTN1
GO:0051963	regulation of synapse assembly	1	54	0.0495238	ENSBTAG00000012137	NTN1
GO:0030516	regulation of axon extension	1	58	0.0530993	ENSBTAG00000012137	NTN1
GO:0061180	mammary gland epithelium development	1	58	0.0530993	ENSBTAG00000012137	NTN1
GO:0061387	regulation of extent of cell growth	1	67	0.0610979	ENSBTAG00000012137	NTN1
GO:0048640	negative regulation of developmental growth	1	71	0.0646325	ENSBTAG00000012137	NTN1
GO:0048675	axon extension	1	78	0.070788	ENSBTAG00000012137	NTN1
GO:0042472	inner ear morphogenesis	1	80	0.0725397	ENSBTAG00000012137	NTN1
GO:0050807	regulation of synapse organization	1	86	0.0777764	ENSBTAG00000012137	NTN1
GO:0010771	negative regulation of cell morphogenesis involved in differentiation	1	87	0.0786465	ENSBTAG00000012137	NTN1
GO:0010977	negative regulation of neuron projection development	1	88	0.0795158	ENSBTAG00000012137	NTN1
GO:0030307	positive regulation of cell growth	1	96	0.0864426	ENSBTAG00000012137	NTN1
GO:0022612	gland morphogenesis	1	98	0.0881666	ENSBTAG00000012137	NTN1
GO:0042471	ear morphogenesis	1	98	0.0881666	ENSBTAG00000012137	NTN1
GO:0007416	synapse assembly	1	100	0.0898876	ENSBTAG00000012137	NTN1
GO:0030879	mammary gland development	1	106	0.0950324	ENSBTAG00000012137	NTN1
GO:0031345	negative regulation of cell projection organization	1	108	0.0967412	ENSBTAG00000012137	NTN1
GO:0048639	positive regulation of developmental growth	1	115	0.102698	ENSBTAG00000012137	NTN1
GO:1990138	neuron projection extension	1	116	0.103546	ENSBTAG00000012137	NTN1
GO:0001764	neuron migration	1	118	0.10524	ENSBTAG00000012137	NTN1
GO:0030308	negative regulation of cell growth	1	122	0.108619	ENSBTAG00000012137	NTN1
GO:0050770	regulation of axonogenesis	1	122	0.108619	ENSBTAG00000012137	NTN1
GO:0008361	regulation of cell size	1	123	0.109461	ENSBTAG00000012137	NTN1
GO:0010770	positive regulation of cell morphogenesis involved in differentiation	1	136	0.12035	ENSBTAG00000012137	NTN1
GO:0048588	developmental cell growth	1	141	0.124504	ENSBTAG00000012137	NTN1
GO:0045665	negative regulation of neuron differentiation	1	143	0.126161	ENSBTAG00000012137	NTN1
GO:0010976	positive regulation of neuron projection development	1	151	0.132758	ENSBTAG00000012137	NTN1
GO:0048839	inner ear development	1	152	0.133579	ENSBTAG00000012137	NTN1
GO:0045926	negative regulation of growth	1	160	0.140124	ENSBTAG00000012137	NTN1
GO:0045927	positive regulation of growth	1	166	0.145002	ENSBTAG00000012137	NTN1
GO:0060560	developmental growth involved in morphogenesis	1	171	0.149047	ENSBTAG00000012137	NTN1
GO:0043583	ear development	1	176	0.153074	ENSBTAG00000012137	NTN1
GO:0050768	negative regulation of neurogenesis	1	180	0.156283	ENSBTAG00000012137	NTN1
GO:0007411	axon guidance	1	187	0.161871	ENSBTAG00000012137	NTN1
GO:0097485	neuron projection guidance	1	188	0.162667	ENSBTAG00000012137	NTN1
GO:0051961	negative regulation of nervous system development	1	194	0.167425	ENSBTAG00000012137	NTN1
GO:0050808	synapse organization	1	219	0.186978	ENSBTAG00000012137	NTN1
GO:0090596	sensory organ morphogenesis	1	219	0.186978	ENSBTAG00000012137	NTN1
GO:0048638	regulation of developmental growth	1	220	0.187751	ENSBTAG00000012137	NTN1
GO:0031346	positive regulation of cell projection organization	1	228	0.193911	ENSBTAG00000012137	NTN1
GO:0010721	negative regulation of cell development	1	233	0.197739	ENSBTAG00000012137	NTN1
GO:0048562	embryonic organ morphogenesis	1	243	0.205344	ENSBTAG00000012137	NTN1
GO:0060562	epithelial tube morphogenesis	1	256	0.215129	ENSBTAG00000012137	NTN1
GO:0035239	tube morphogenesis	1	284	0.235821	ENSBTAG00000012137	NTN1
GO:0048732	gland development	1	292	0.241639	ENSBTAG00000012137	NTN1
GO:0032535	regulation of cellular component size	1	297	0.245254	ENSBTAG00000012137	NTN1
GO:0007409	axonogenesis	1	319	0.260968	ENSBTAG00000012137	NTN1
GO:0051656	establishment of organelle localization	1	328	0.267308	ENSBTAG00000012137	NTN1
GO:0061564	axon development	1	348	0.281215	ENSBTAG00000012137	NTN1
GO:0048568	embryonic organ development	1	354	0.285338	ENSBTAG00000012137	NTN1
GO:0090066	regulation of anatomical structure size	1	368	0.294873	ENSBTAG00000012137	NTN1
GO:0002009	morphogenesis of an epithelium	1	397	0.314247	ENSBTAG00000012137	NTN1
GO:0007423	sensory organ development	1	446	0.345851	ENSBTAG00000012137	NTN1
GO:0048589	developmental growth	1	462	0.355872	ENSBTAG00000012137	NTN1
GO:0006935	chemotaxis	1	473	0.362677	ENSBTAG00000012137	NTN1
GO:0048598	embryonic morphogenesis	1	475	0.363907	ENSBTAG00000012137	NTN1
GO:0042330	taxis	1	476	0.364522	ENSBTAG00000012137	NTN1
GO:0048729	tissue morphogenesis	1	508	0.383885	ENSBTAG00000012137	NTN1
GO:0051129	negative regulation of cellular component organization	1	567	0.418145	ENSBTAG00000012137	NTN1
GO:0044087	regulation of cellular component biogenesis	1	718	0.497871	ENSBTAG00000012137	NTN1
GO:0098609	cell-cell adhesion	1	748	0.512438	ENSBTAG00000012137	NTN1
GO:0009887	organ morphogenesis	1	777	0.526142	ENSBTAG00000012137	NTN1
GO:0009790	embryo development	1	839	0.554238	ENSBTAG00000012137	NTN1
GO:0060429	epithelium development	1	865	0.565549	ENSBTAG00000012137	NTN1
GO:0051130	positive regulation of cellular component organization	1	958	0.603844	ENSBTAG00000012137	NTN1
GO:0007155	cell adhesion	1	1136	0.668476	ENSBTAG00000012137	NTN1
GO:0022610	biological adhesion	1	1141	0.67014	ENSBTAG00000012137	NTN1
GO:0065008	regulation of biological quality	2	2792	0.763904	ENSBTAG00000012137;ENSBTAG00000049618	NTN1
GO:0016358	dendrite development	2	142	0.00766078	ENSBTAG00000012137;ENSBTAG00000021938	NTN1;ARHGAP44
GO:0010769	regulation of cell morphogenesis involved in differentiation	2	267	0.0253851	ENSBTAG00000012137;ENSBTAG00000021938	NTN1;ARHGAP44
GO:0010975	regulation of neuron projection development	2	301	0.0316845	ENSBTAG00000012137;ENSBTAG00000021938	NTN1;ARHGAP44
GO:0048667	cell morphogenesis involved in neuron differentiation	2	400	0.0530722	ENSBTAG00000012137;ENSBTAG00000021938	NTN1;ARHGAP44
GO:0048812	neuron projection morphogenesis	2	433	0.0611008	ENSBTAG00000012137;ENSBTAG00000021938	NTN1;ARHGAP44
GO:0022604	regulation of cell morphogenesis	2	441	0.0631084	ENSBTAG00000012137;ENSBTAG00000021938	NTN1;ARHGAP44
GO:0031344	regulation of cell projection organization	2	445	0.0641208	ENSBTAG00000012137;ENSBTAG00000021938	NTN1;ARHGAP44
GO:0000904	cell morphogenesis involved in differentiation	2	621	0.113638	ENSBTAG00000012137;ENSBTAG00000021938	NTN1;ARHGAP44
GO:0031175	neuron projection development	2	624	0.114554	ENSBTAG00000012137;ENSBTAG00000021938	NTN1;ARHGAP44
GO:0048858	cell projection morphogenesis	2	710	0.141645	ENSBTAG00000012137;ENSBTAG00000021938	NTN1;ARHGAP44
GO:0032990	cell part morphogenesis	2	725	0.146515	ENSBTAG00000012137;ENSBTAG00000021938	NTN1;ARHGAP44
GO:0048666	neuron development	2	769	0.161017	ENSBTAG00000012137;ENSBTAG00000021938	NTN1;ARHGAP44
GO:0000902	cell morphogenesis	2	1095	0.2747	ENSBTAG00000012137;ENSBTAG00000021938	NTN1;ARHGAP44
GO:0030030	cell projection organization	2	1095	0.2747	ENSBTAG00000012137;ENSBTAG00000021938	NTN1;ARHGAP44
GO:0032989	cellular component morphogenesis	2	1166	0.300075	ENSBTAG00000012137;ENSBTAG00000021938	NTN1;ARHGAP44
GO:0051128	regulation of cellular component organization	3	1924	0.267391	ENSBTAG00000012137;ENSBTAG00000021938;ENSBTAG00000035706	NTN1;ARHGAP44;MYOCD
GO:0022603	regulation of anatomical structure morphogenesis	3	797	0.0361735	ENSBTAG00000012137;ENSBTAG00000017771;ENSBTAG00000021938	NTN1;EPN2;ARHGAP44
GO:0009653	anatomical structure morphogenesis	4	2225	0.146366	ENSBTAG00000012137;ENSBTAG00000017771;ENSBTAG00000021938;ENSBTAG00000035706	NTN1;EPN2;ARHGAP44;MYOCD
GO:0051093	negative regulation of developmental process	3	698	0.0257067	ENSBTAG00000012137;ENSBTAG00000017771;ENSBTAG00000035706	NTN1;EPN2;MYOCD
GO:0051241	negative regulation of multicellular organismal process	3	802	0.0367538	ENSBTAG00000012137;ENSBTAG00000017771;ENSBTAG00000035706	NTN1;EPN2;MYOCD
GO:0001558	regulation of cell growth	2	241	0.0209681	ENSBTAG00000012137;ENSBTAG00000035706	NTN1;MYOCD
GO:0016049	cell growth	2	290	0.0295836	ENSBTAG00000012137;ENSBTAG00000035706	NTN1;MYOCD
GO:0040008	regulation of growth	2	390	0.0507226	ENSBTAG00000012137;ENSBTAG00000035706	NTN1;MYOCD
GO:0035295	tube development	2	469	0.0703136	ENSBTAG00000012137;ENSBTAG00000035706	NTN1;MYOCD
GO:0045596	negative regulation of cell differentiation	2	501	0.0788718	ENSBTAG00000012137;ENSBTAG00000035706	NTN1;MYOCD
GO:0040007	growth	2	616	0.112115	ENSBTAG00000012137;ENSBTAG00000035706	NTN1;MYOCD
GO:0008284	positive regulation of cell proliferation	2	623	0.114248	ENSBTAG00000012137;ENSBTAG00000035706	NTN1;MYOCD
GO:0042127	regulation of cell proliferation	2	1111	0.280416	ENSBTAG00000012137;ENSBTAG00000035706	NTN1;MYOCD
GO:0008283	cell proliferation	2	1355	0.367163	ENSBTAG00000012137;ENSBTAG00000035706	NTN1;MYOCD
GO:0009888	tissue development	2	1417	0.388823	ENSBTAG00000012137;ENSBTAG00000035706	NTN1;MYOCD
GO:0009605	response to external stimulus	2	1734	0.494812	ENSBTAG00000012137;ENSBTAG00000035706	NTN1;MYOCD
GO:0048513	animal organ development	2	2413	0.683729	ENSBTAG00000012137;ENSBTAG00000035706	NTN1;MYOCD
GO:0022607	cellular component assembly	3	2128	0.322192	ENSBTAG00000012137;ENSBTAG00000013271;ENSBTAG00000015294	NTN1;NCOR1;COX10
GO:0044085	cellular component biogenesis	3	2337	0.37914	ENSBTAG00000012137;ENSBTAG00000013271;ENSBTAG00000015294	NTN1;NCOR1;COX10
GO:0048523	negative regulation of cellular process	5	3717	0.258744	ENSBTAG00000012137;ENSBTAG00000013271;ENSBTAG00000017771;ENSBTAG00000021938;ENSBTAG00000035706	NTN1;NCOR1;EPN2;ARHGAP44;MYOCD
GO:0048519	negative regulation of biological process	5	3974	0.309958	ENSBTAG00000012137;ENSBTAG00000013271;ENSBTAG00000017771;ENSBTAG00000021938;ENSBTAG00000035706	NTN1;NCOR1;EPN2;ARHGAP44;MYOCD
GO:0045666	positive regulation of neuron differentiation	2	209	0.0160364	ENSBTAG00000012137;ENSBTAG00000012293	NTN1;SPAG9
GO:0050769	positive regulation of neurogenesis	2	280	0.0277254	ENSBTAG00000012137;ENSBTAG00000012293	NTN1;SPAG9
GO:0051962	positive regulation of nervous system development	2	327	0.0368801	ENSBTAG00000012137;ENSBTAG00000012293	NTN1;SPAG9
GO:0010720	positive regulation of cell development	2	373	0.0468209	ENSBTAG00000012137;ENSBTAG00000012293	NTN1;SPAG9
GO:0051640	organelle localization	2	428	0.059858	ENSBTAG00000012137;ENSBTAG00000012293	NTN1;SPAG9
GO:0045664	regulation of neuron differentiation	3	415	0.00633749	ENSBTAG00000012137;ENSBTAG00000012293;ENSBTAG00000021938	NTN1;SPAG9;ARHGAP44
GO:0050767	regulation of neurogenesis	3	531	0.0124402	ENSBTAG00000012137;ENSBTAG00000012293;ENSBTAG00000021938	NTN1;SPAG9;ARHGAP44
GO:0051960	regulation of nervous system development	3	609	0.017958	ENSBTAG00000012137;ENSBTAG00000012293;ENSBTAG00000021938	NTN1;SPAG9;ARHGAP44
GO:0060284	regulation of cell development	3	694	0.0253248	ENSBTAG00000012137;ENSBTAG00000012293;ENSBTAG00000021938	NTN1;SPAG9;ARHGAP44
GO:0030182	neuron differentiation	3	956	0.0570159	ENSBTAG00000012137;ENSBTAG00000012293;ENSBTAG00000021938	NTN1;SPAG9;ARHGAP44
GO:0048699	generation of neurons	3	1081	0.0767503	ENSBTAG00000012137;ENSBTAG00000012293;ENSBTAG00000021938	NTN1;SPAG9;ARHGAP44
GO:0022008	neurogenesis	3	1166	0.0917472	ENSBTAG00000012137;ENSBTAG00000012293;ENSBTAG00000021938	NTN1;SPAG9;ARHGAP44
GO:0007399	nervous system development	3	1580	0.180171	ENSBTAG00000012137;ENSBTAG00000012293;ENSBTAG00000021938	NTN1;SPAG9;ARHGAP44
GO:0048468	cell development	3	1642	0.19519	ENSBTAG00000012137;ENSBTAG00000012293;ENSBTAG00000021938	NTN1;SPAG9;ARHGAP44
GO:0045595	regulation of cell differentiation	4	1259	0.0263152	ENSBTAG00000012137;ENSBTAG00000012293;ENSBTAG00000021938;ENSBTAG00000035706	NTN1;SPAG9;ARHGAP44;MYOCD
GO:0030154	cell differentiation	4	2837	0.26999	ENSBTAG00000012137;ENSBTAG00000012293;ENSBTAG00000021938;ENSBTAG00000035706	NTN1;SPAG9;ARHGAP44;MYOCD
GO:0048869	cellular developmental process	4	3142	0.339393	ENSBTAG00000012137;ENSBTAG00000012293;ENSBTAG00000021938;ENSBTAG00000035706	NTN1;SPAG9;ARHGAP44;MYOCD
GO:2000026	regulation of multicellular organismal development	5	1425	0.00810261	ENSBTAG00000012137;ENSBTAG00000012293;ENSBTAG00000017771;ENSBTAG00000021938;ENSBTAG00000035706	NTN1;SPAG9;EPN2;ARHGAP44;MYOCD
GO:0050793	regulation of developmental process	5	1893	0.0257383	ENSBTAG00000012137;ENSBTAG00000012293;ENSBTAG00000017771;ENSBTAG00000021938;ENSBTAG00000035706	NTN1;SPAG9;EPN2;ARHGAP44;MYOCD
GO:0051239	regulation of multicellular organismal process	5	2160	0.0427345	ENSBTAG00000012137;ENSBTAG00000012293;ENSBTAG00000017771;ENSBTAG00000021938;ENSBTAG00000035706	NTN1;SPAG9;EPN2;ARHGAP44;MYOCD
GO:0048731	system development	5	3331	0.188127	ENSBTAG00000012137;ENSBTAG00000012293;ENSBTAG00000017771;ENSBTAG00000021938;ENSBTAG00000035706	NTN1;SPAG9;EPN2;ARHGAP44;MYOCD
GO:0007275	multicellular organism development	5	3643	0.24455	ENSBTAG00000012137;ENSBTAG00000012293;ENSBTAG00000017771;ENSBTAG00000021938;ENSBTAG00000035706	NTN1;SPAG9;EPN2;ARHGAP44;MYOCD
GO:0048856	anatomical structure development	5	4126	0.34136	ENSBTAG00000012137;ENSBTAG00000012293;ENSBTAG00000017771;ENSBTAG00000021938;ENSBTAG00000035706	NTN1;SPAG9;EPN2;ARHGAP44;MYOCD
GO:0044767	single-organism developmental process	5	4423	0.40417	ENSBTAG00000012137;ENSBTAG00000012293;ENSBTAG00000017771;ENSBTAG00000021938;ENSBTAG00000035706	NTN1;SPAG9;EPN2;ARHGAP44;MYOCD
GO:0044707	single-multicellular organism process	5	4450	0.409933	ENSBTAG00000012137;ENSBTAG00000012293;ENSBTAG00000017771;ENSBTAG00000021938;ENSBTAG00000035706	NTN1;SPAG9;EPN2;ARHGAP44;MYOCD
GO:0032502	developmental process	5	4473	0.414847	ENSBTAG00000012137;ENSBTAG00000012293;ENSBTAG00000017771;ENSBTAG00000021938;ENSBTAG00000035706	NTN1;SPAG9;EPN2;ARHGAP44;MYOCD
GO:0032501	multicellular organismal process	5	5964	0.710604	ENSBTAG00000012137;ENSBTAG00000012293;ENSBTAG00000017771;ENSBTAG00000021938;ENSBTAG00000035706	NTN1;SPAG9;EPN2;ARHGAP44;MYOCD
GO:0045597	positive regulation of cell differentiation	3	658	0.0220304	ENSBTAG00000012137;ENSBTAG00000012293;ENSBTAG00000035706	NTN1;SPAG9;MYOCD
GO:0030334	regulation of cell migration	3	663	0.0224726	ENSBTAG00000012137;ENSBTAG00000012293;ENSBTAG00000035706	NTN1;SPAG9;MYOCD
GO:2000145	regulation of cell motility	3	702	0.0260919	ENSBTAG00000012137;ENSBTAG00000012293;ENSBTAG00000035706	NTN1;SPAG9;MYOCD
GO:0051270	regulation of cellular component movement	3	750	0.0309615	ENSBTAG00000012137;ENSBTAG00000012293;ENSBTAG00000035706	NTN1;SPAG9;MYOCD
GO:0040012	regulation of locomotion	3	779	0.0341257	ENSBTAG00000012137;ENSBTAG00000012293;ENSBTAG00000035706	NTN1;SPAG9;MYOCD
GO:0051094	positive regulation of developmental process	3	989	0.0619477	ENSBTAG00000012137;ENSBTAG00000012293;ENSBTAG00000035706	NTN1;SPAG9;MYOCD
GO:0016477	cell migration	3	1121	0.0836543	ENSBTAG00000012137;ENSBTAG00000012293;ENSBTAG00000035706	NTN1;SPAG9;MYOCD
GO:0051240	positive regulation of multicellular organismal process	3	1198	0.0977058	ENSBTAG00000012137;ENSBTAG00000012293;ENSBTAG00000035706	NTN1;SPAG9;MYOCD
GO:0032879	regulation of localization	4	1932	0.098762	ENSBTAG00000012137;ENSBTAG00000012293;ENSBTAG00000035706;ENSBTAG00000049618	NTN1;SPAG9;MYOCD
GO:0048870	cell motility	3	1233	0.104411	ENSBTAG00000012137;ENSBTAG00000012293;ENSBTAG00000035706	NTN1;SPAG9;MYOCD
GO:0051674	localization of cell	3	1233	0.104411	ENSBTAG00000012137;ENSBTAG00000012293;ENSBTAG00000035706	NTN1;SPAG9;MYOCD
GO:0040011	locomotion	3	1437	0.147085	ENSBTAG00000012137;ENSBTAG00000012293;ENSBTAG00000035706	NTN1;SPAG9;MYOCD
GO:0006928	movement of cell or subcellular component	3	1563	0.176119	ENSBTAG00000012137;ENSBTAG00000012293;ENSBTAG00000035706	NTN1;SPAG9;MYOCD
GO:0048522	positive regulation of cellular process	5	4247	0.366775	ENSBTAG00000012137;ENSBTAG00000012293;ENSBTAG00000013271;ENSBTAG00000017771;ENSBTAG00000035706	NTN1;SPAG9;NCOR1;EPN2;MYOCD
GO:1903441	protein localization to ciliary membrane	1	11	0.0102803	ENSBTAG00000011505	RABEP1
GO:0006893	Golgi to plasma membrane transport	1	39	0.036003	ENSBTAG00000011505	RABEP1
GO:0061512	protein localization to cilium	1	56	0.0513131	ENSBTAG00000011505	RABEP1
GO:0006892	post-Golgi vesicle-mediated transport	1	68	0.0619827	ENSBTAG00000011505	RABEP1
GO:0072659	protein localization to plasma membrane	1	210	0.179989	ENSBTAG00000011505	RABEP1
GO:0048193	Golgi vesicle transport	1	212	0.181547	ENSBTAG00000011505	RABEP1
GO:1990778	protein localization to cell periphery	1	219	0.186978	ENSBTAG00000011505	RABEP1
GO:0007009	plasma membrane organization	1	291	0.240914	ENSBTAG00000011505	RABEP1
GO:0072657	protein localization to membrane	1	371	0.296901	ENSBTAG00000011505	RABEP1
GO:0010256	endomembrane system organization	1	509	0.384481	ENSBTAG00000011505	RABEP1
GO:0033365	protein localization to organelle	1	630	0.452751	ENSBTAG00000011505	RABEP1
GO:0044802	single-organism membrane organization	1	739	0.50811	ENSBTAG00000011505	RABEP1
GO:0061024	membrane organization	1	831	0.550703	ENSBTAG00000011505	RABEP1
GO:1902580	single-organism cellular localization	1	911	0.584905	ENSBTAG00000011505	RABEP1
GO:0015031	protein transport	1	1022	0.628333	ENSBTAG00000011505	RABEP1
GO:0045184	establishment of protein localization	1	1110	0.659695	ENSBTAG00000011505	RABEP1
GO:0034613	cellular protein localization	1	1294	0.71743	ENSBTAG00000011505	RABEP1
GO:0070727	cellular macromolecule localization	1	1300	0.719148	ENSBTAG00000011505	RABEP1
GO:0071702	organic substance transport	1	1710	0.815903	ENSBTAG00000011505	RABEP1
GO:0008104	protein localization	1	1725	0.818764	ENSBTAG00000011505	RABEP1
GO:0033036	macromolecule localization	1	2064	0.873328	ENSBTAG00000011505	RABEP1
GO:0043547	positive regulation of GTPase activity	2	293	0.0301507	ENSBTAG00000011505;ENSBTAG00000021938	RABEP1;ARHGAP44
GO:0043087	regulation of GTPase activity	2	350	0.0417349	ENSBTAG00000011505;ENSBTAG00000021938	RABEP1;ARHGAP44
GO:0051345	positive regulation of hydrolase activity	2	516	0.0829956	ENSBTAG00000011505;ENSBTAG00000021938	RABEP1;ARHGAP44
GO:0051336	regulation of hydrolase activity	2	942	0.220398	ENSBTAG00000011505;ENSBTAG00000021938	RABEP1;ARHGAP44
GO:0006897	endocytosis	2	497	0.077784	ENSBTAG00000011505;ENSBTAG00000017771	RABEP1;EPN2
GO:0016043	cellular component organization	6	5219	0.360732	ENSBTAG00000011505;ENSBTAG00000012137;ENSBTAG00000013271;ENSBTAG00000015294;ENSBTAG00000021938;ENSBTAG00000035706	RABEP1;NTN1;NCOR1;COX10;ARHGAP44;MYOCD
GO:0071840	cellular component organization or biogenesis	6	5390	0.394559	ENSBTAG00000011505;ENSBTAG00000012137;ENSBTAG00000013271;ENSBTAG00000015294;ENSBTAG00000021938;ENSBTAG00000035706	RABEP1;NTN1;NCOR1;COX10;ARHGAP44;MYOCD
GO:0051649	establishment of localization in cell	3	1865	0.251857	ENSBTAG00000011505;ENSBTAG00000012137;ENSBTAG00000012293	RABEP1;NTN1;SPAG9
GO:0051641	cellular localization	3	2390	0.393572	ENSBTAG00000011505;ENSBTAG00000012137;ENSBTAG00000012293	RABEP1;NTN1;SPAG9
GO:0048518	positive regulation of biological process	8	4868	0.0571384	ENSBTAG00000011505;ENSBTAG00000012137;ENSBTAG00000012293;ENSBTAG00000013271;ENSBTAG00000017771;ENSBTAG00000021938;ENSBTAG00000031679;ENSBTAG00000035706	RABEP1;NTN1;SPAG9;NCOR1;EPN2;ARHGAP44;HSD17B13;MYOCD
GO:0016482	cytoplasmic transport	2	809	0.174448	ENSBTAG00000011505;ENSBTAG00000012293	RABEP1;SPAG9
GO:1902582	single-organism intracellular transport	2	1271	0.337495	ENSBTAG00000011505;ENSBTAG00000012293	RABEP1;SPAG9
GO:0046907	intracellular transport	2	1442	0.397487	ENSBTAG00000011505;ENSBTAG00000012293	RABEP1;SPAG9
GO:0043085	positive regulation of catalytic activity	3	963	0.058045	ENSBTAG00000011505;ENSBTAG00000012293;ENSBTAG00000021938	RABEP1;SPAG9;ARHGAP44
GO:0044093	positive regulation of molecular function	4	1220	0.0237294	ENSBTAG00000011505;ENSBTAG00000012293;ENSBTAG00000021938;ENSBTAG00000035706	RABEP1;SPAG9;ARHGAP44;MYOCD
GO:0065009	regulation of molecular function	5	2288	0.0529416	ENSBTAG00000011505;ENSBTAG00000012293;ENSBTAG00000021938;ENSBTAG00000035706;ENSBTAG00000049618	RABEP1;SPAG9;ARHGAP44;MYOCD
GO:0050790	regulation of catalytic activity	4	1812	0.0819576	ENSBTAG00000011505;ENSBTAG00000012293;ENSBTAG00000021938;ENSBTAG00000035706	RABEP1;SPAG9;ARHGAP44;MYOCD
GO:0016192	vesicle-mediated transport	3	1099	0.0798228	ENSBTAG00000011505;ENSBTAG00000012293;ENSBTAG00000017771	RABEP1;SPAG9;EPN2
GO:0009893	positive regulation of metabolic process	6	3099	0.0549483	ENSBTAG00000011505;ENSBTAG00000012293;ENSBTAG00000013271;ENSBTAG00000021938;ENSBTAG00000031679;ENSBTAG00000035706	RABEP1;SPAG9;NCOR1;ARHGAP44;HSD17B13;MYOCD
GO:0055085	transmembrane transport	3	1271	0.111907	ENSBTAG00000003700;ENSBTAG00000015294;ENSBTAG00000049618	SLC5A10;COX10
GO:0044699	single-organism process	14	13205	0.265906	ENSBTAG00000003700;ENSBTAG00000003705;ENSBTAG00000011505;ENSBTAG00000012137;ENSBTAG00000012293;ENSBTAG00000013271;ENSBTAG00000015294;ENSBTAG00000017771;ENSBTAG00000021938;ENSBTAG00000031679;ENSBTAG00000035706;ENSBTAG00000040489;ENSBTAG00000049618;ENSBTAG00000052671	SLC5A10;FAM83G;RABEP1;NTN1;SPAG9;NCOR1;COX10;EPN2;ARHGAP44;HSD17B13;MYOCD;LOC516101;LOC511136
GO:0044763	single-organism cellular process	13	11990	0.255189	ENSBTAG00000003700;ENSBTAG00000003705;ENSBTAG00000011505;ENSBTAG00000012137;ENSBTAG00000012293;ENSBTAG00000013271;ENSBTAG00000015294;ENSBTAG00000017771;ENSBTAG00000021938;ENSBTAG00000035706;ENSBTAG00000040489;ENSBTAG00000049618;ENSBTAG00000052671	SLC5A10;FAM83G;RABEP1;NTN1;SPAG9;NCOR1;COX10;EPN2;ARHGAP44;MYOCD;LOC516101;LOC511136
GO:0051234	establishment of localization	7	3668	0.0385991	ENSBTAG00000003700;ENSBTAG00000011505;ENSBTAG00000012137;ENSBTAG00000012293;ENSBTAG00000015294;ENSBTAG00000017771;ENSBTAG00000049618	SLC5A10;RABEP1;NTN1;SPAG9;COX10;EPN2
GO:0051179	localization	8	4951	0.0625795	ENSBTAG00000003700;ENSBTAG00000011505;ENSBTAG00000012137;ENSBTAG00000012293;ENSBTAG00000015294;ENSBTAG00000017771;ENSBTAG00000035706;ENSBTAG00000049618	SLC5A10;RABEP1;NTN1;SPAG9;COX10;EPN2;MYOCD
GO:0044765	single-organism transport	5	3150	0.158343	ENSBTAG00000003700;ENSBTAG00000011505;ENSBTAG00000012293;ENSBTAG00000015294;ENSBTAG00000049618	SLC5A10;RABEP1;SPAG9;COX10
GO:1902578	single-organism localization	5	3365	0.193979	ENSBTAG00000003700;ENSBTAG00000011505;ENSBTAG00000012293;ENSBTAG00000015294;ENSBTAG00000049618	SLC5A10;RABEP1;SPAG9;COX10
GO:0006810	transport	6	3526	0.0934075	ENSBTAG00000003700;ENSBTAG00000011505;ENSBTAG00000012293;ENSBTAG00000015294;ENSBTAG00000017771;ENSBTAG00000049618	SLC5A10;RABEP1;SPAG9;COX10;EPN2
GO:0007257	activation of JUN kinase activity	1	26	0.0241393	ENSBTAG00000012293	SPAG9
GO:0032418	lysosome localization	1	48	0.044137	ENSBTAG00000012293	SPAG9
GO:0043507	positive regulation of JUN kinase activity	1	48	0.044137	ENSBTAG00000012293	SPAG9
GO:0043506	regulation of JUN kinase activity	1	56	0.0513131	ENSBTAG00000012293	SPAG9
GO:0042147	retrograde transport, endosome to Golgi	1	64	0.0584388	ENSBTAG00000012293	SPAG9
GO:0000187	activation of MAPK activity	1	87	0.0786465	ENSBTAG00000012293	SPAG9
GO:0046330	positive regulation of JNK cascade	1	103	0.0924634	ENSBTAG00000012293	SPAG9
GO:0032874	positive regulation of stress-activated MAPK cascade	1	123	0.109461	ENSBTAG00000012293	SPAG9
GO:0070304	positive regulation of stress-activated protein kinase signaling cascade	1	125	0.111145	ENSBTAG00000012293	SPAG9
GO:0043406	positive regulation of MAP kinase activity	1	139	0.122844	ENSBTAG00000012293	SPAG9
GO:0032147	activation of protein kinase activity	1	196	0.169005	ENSBTAG00000012293	SPAG9
GO:0071902	positive regulation of protein serine/threonine kinase activity	1	212	0.181547	ENSBTAG00000012293	SPAG9
GO:0043405	regulation of MAP kinase activity	1	220	0.187751	ENSBTAG00000012293	SPAG9
GO:0016197	endosomal transport	1	229	0.194678	ENSBTAG00000012293	SPAG9
GO:0045860	positive regulation of protein kinase activity	1	347	0.280525	ENSBTAG00000012293	SPAG9
GO:0043410	positive regulation of MAPK cascade	1	371	0.296901	ENSBTAG00000012293	SPAG9
GO:0030335	positive regulation of cell migration	1	382	0.304289	ENSBTAG00000012293	SPAG9
GO:2000147	positive regulation of cell motility	1	397	0.314247	ENSBTAG00000012293	SPAG9
GO:0051272	positive regulation of cellular component movement	1	403	0.318192	ENSBTAG00000012293	SPAG9
GO:0033674	positive regulation of kinase activity	1	408	0.321464	ENSBTAG00000012293	SPAG9
GO:0040017	positive regulation of locomotion	1	415	0.326019	ENSBTAG00000012293	SPAG9
GO:0051347	positive regulation of transferase activity	1	464	0.357114	ENSBTAG00000012293	SPAG9
GO:0001934	positive regulation of protein phosphorylation	1	745	0.510999	ENSBTAG00000012293	SPAG9
GO:1902533	positive regulation of intracellular signal transduction	1	757	0.51673	ENSBTAG00000012293	SPAG9
GO:0042327	positive regulation of phosphorylation	1	793	0.533547	ENSBTAG00000012293	SPAG9
GO:0010562	positive regulation of phosphorus metabolic process	1	842	0.555557	ENSBTAG00000012293	SPAG9
GO:0045937	positive regulation of phosphate metabolic process	1	842	0.555557	ENSBTAG00000012293	SPAG9
GO:0031401	positive regulation of protein modification process	1	933	0.593873	ENSBTAG00000012293	SPAG9
GO:0009967	positive regulation of signal transduction	3	1141	0.0872092	ENSBTAG00000012293;ENSBTAG00000017771;ENSBTAG00000035706	SPAG9;EPN2;MYOCD
GO:0023056	positive regulation of signaling	3	1260	0.109714	ENSBTAG00000012293;ENSBTAG00000017771;ENSBTAG00000035706	SPAG9;EPN2;MYOCD
GO:0010647	positive regulation of cell communication	3	1285	0.114723	ENSBTAG00000012293;ENSBTAG00000017771;ENSBTAG00000035706	SPAG9;EPN2;MYOCD
GO:0048584	positive regulation of response to stimulus	3	1644	0.195681	ENSBTAG00000012293;ENSBTAG00000017771;ENSBTAG00000035706	SPAG9;EPN2;MYOCD
GO:0051146	striated muscle cell differentiation	2	188	0.013118	ENSBTAG00000012293;ENSBTAG00000035706	SPAG9;MYOCD
GO:0042692	muscle cell differentiation	2	268	0.0255621	ENSBTAG00000012293;ENSBTAG00000035706	SPAG9;MYOCD
GO:0071900	regulation of protein serine/threonine kinase activity	2	359	0.0436981	ENSBTAG00000012293;ENSBTAG00000035706	SPAG9;MYOCD
GO:0061061	muscle structure development	2	410	0.0554612	ENSBTAG00000012293;ENSBTAG00000035706	SPAG9;MYOCD
GO:0045859	regulation of protein kinase activity	2	552	0.0931662	ENSBTAG00000012293;ENSBTAG00000035706	SPAG9;MYOCD
GO:0043549	regulation of kinase activity	2	637	0.11855	ENSBTAG00000012293;ENSBTAG00000035706	SPAG9;MYOCD
GO:0051338	regulation of transferase activity	2	734	0.149456	ENSBTAG00000012293;ENSBTAG00000035706	SPAG9;MYOCD
GO:0046328	regulation of JNK cascade	2	133	0.00675032	ENSBTAG00000012293;ENSBTAG00000013271	SPAG9;NCOR1
GO:0007254	JNK cascade	2	142	0.00766078	ENSBTAG00000012293;ENSBTAG00000013271	SPAG9;NCOR1
GO:0032872	regulation of stress-activated MAPK cascade	2	165	0.0102245	ENSBTAG00000012293;ENSBTAG00000013271	SPAG9;NCOR1
GO:0070302	regulation of stress-activated protein kinase signaling cascade	2	168	0.0105835	ENSBTAG00000012293;ENSBTAG00000013271	SPAG9;NCOR1
GO:0051403	stress-activated MAPK cascade	2	182	0.0123321	ENSBTAG00000012293;ENSBTAG00000013271	SPAG9;NCOR1
GO:0031098	stress-activated protein kinase signaling cascade	2	195	0.014062	ENSBTAG00000012293;ENSBTAG00000013271	SPAG9;NCOR1
GO:0043408	regulation of MAPK cascade	2	513	0.0821653	ENSBTAG00000012293;ENSBTAG00000013271	SPAG9;NCOR1
GO:0000165	MAPK cascade	2	559	0.0951865	ENSBTAG00000012293;ENSBTAG00000013271	SPAG9;NCOR1
GO:0023014	signal transduction by protein phosphorylation	2	559	0.0951865	ENSBTAG00000012293;ENSBTAG00000013271	SPAG9;NCOR1
GO:0080135	regulation of cellular response to stress	2	575	0.0998543	ENSBTAG00000012293;ENSBTAG00000013271	SPAG9;NCOR1
GO:0080134	regulation of response to stress	2	1032	0.252235	ENSBTAG00000012293;ENSBTAG00000013271	SPAG9;NCOR1
GO:0032270	positive regulation of cellular protein metabolic process	2	1192	0.309362	ENSBTAG00000012293;ENSBTAG00000013271	SPAG9;NCOR1
GO:0051247	positive regulation of protein metabolic process	2	1262	0.334299	ENSBTAG00000012293;ENSBTAG00000013271	SPAG9;NCOR1
GO:0033554	cellular response to stress	2	1424	0.391253	ENSBTAG00000012293;ENSBTAG00000013271	SPAG9;NCOR1
GO:1902531	regulation of intracellular signal transduction	3	1292	0.116143	ENSBTAG00000012293;ENSBTAG00000013271;ENSBTAG00000021938	SPAG9;NCOR1;ARHGAP44
GO:0035556	intracellular signal transduction	3	1919	0.266068	ENSBTAG00000012293;ENSBTAG00000013271;ENSBTAG00000021938	SPAG9;NCOR1;ARHGAP44
GO:0044710	single-organism metabolic process	5	4142	0.344703	ENSBTAG00000012293;ENSBTAG00000013271;ENSBTAG00000015294;ENSBTAG00000031679;ENSBTAG00000035706	SPAG9;NCOR1;COX10;HSD17B13;MYOCD
GO:0009966	regulation of signal transduction	6	2177	0.0110305	ENSBTAG00000012293;ENSBTAG00000013271;ENSBTAG00000017771;ENSBTAG00000021938;ENSBTAG00000035706;ENSBTAG00000049618	SPAG9;NCOR1;EPN2;ARHGAP44;MYOCD
GO:0023051	regulation of signaling	6	2460	0.0196589	ENSBTAG00000012293;ENSBTAG00000013271;ENSBTAG00000017771;ENSBTAG00000021938;ENSBTAG00000035706;ENSBTAG00000049618	SPAG9;NCOR1;EPN2;ARHGAP44;MYOCD
GO:0010646	regulation of cell communication	6	2489	0.0207556	ENSBTAG00000012293;ENSBTAG00000013271;ENSBTAG00000017771;ENSBTAG00000021938;ENSBTAG00000035706;ENSBTAG00000049618	SPAG9;NCOR1;EPN2;ARHGAP44;MYOCD
GO:0048583	regulation of response to stimulus	6	2924	0.0427974	ENSBTAG00000012293;ENSBTAG00000013271;ENSBTAG00000017771;ENSBTAG00000021938;ENSBTAG00000035706;ENSBTAG00000049618	SPAG9;NCOR1;EPN2;ARHGAP44;MYOCD
GO:0001932	regulation of protein phosphorylation	3	1086	0.0775981	ENSBTAG00000012293;ENSBTAG00000013271;ENSBTAG00000035706	SPAG9;NCOR1;MYOCD
GO:0042325	regulation of phosphorylation	3	1197	0.0975171	ENSBTAG00000012293;ENSBTAG00000013271;ENSBTAG00000035706	SPAG9;NCOR1;MYOCD
GO:0019220	regulation of phosphate metabolic process	3	1361	0.13051	ENSBTAG00000012293;ENSBTAG00000013271;ENSBTAG00000035706	SPAG9;NCOR1;MYOCD
GO:0051174	regulation of phosphorus metabolic process	3	1365	0.131363	ENSBTAG00000012293;ENSBTAG00000013271;ENSBTAG00000035706	SPAG9;NCOR1;MYOCD
GO:0031399	regulation of protein modification process	3	1497	0.160684	ENSBTAG00000012293;ENSBTAG00000013271;ENSBTAG00000035706	SPAG9;NCOR1;MYOCD
GO:0006468	protein phosphorylation	3	1522	0.166474	ENSBTAG00000012293;ENSBTAG00000013271;ENSBTAG00000035706	SPAG9;NCOR1;MYOCD
GO:0016310	phosphorylation	3	1849	0.247677	ENSBTAG00000012293;ENSBTAG00000013271;ENSBTAG00000035706	SPAG9;NCOR1;MYOCD
GO:0032268	regulation of cellular protein metabolic process	3	2094	0.312973	ENSBTAG00000012293;ENSBTAG00000013271;ENSBTAG00000035706	SPAG9;NCOR1;MYOCD
GO:0051246	regulation of protein metabolic process	3	2232	0.350502	ENSBTAG00000012293;ENSBTAG00000013271;ENSBTAG00000035706	SPAG9;NCOR1;MYOCD
GO:0006796	phosphate-containing compound metabolic process	3	2600	0.450225	ENSBTAG00000012293;ENSBTAG00000013271;ENSBTAG00000035706	SPAG9;NCOR1;MYOCD
GO:0006793	phosphorus metabolic process	3	2642	0.4614	ENSBTAG00000012293;ENSBTAG00000013271;ENSBTAG00000035706	SPAG9;NCOR1;MYOCD
GO:0031325	positive regulation of cellular metabolic process	3	2654	0.46458	ENSBTAG00000012293;ENSBTAG00000013271;ENSBTAG00000035706	SPAG9;NCOR1;MYOCD
GO:0010604	positive regulation of macromolecule metabolic process	3	2657	0.465375	ENSBTAG00000012293;ENSBTAG00000013271;ENSBTAG00000035706	SPAG9;NCOR1;MYOCD
GO:0006950	response to stress	3	2706	0.478294	ENSBTAG00000012293;ENSBTAG00000013271;ENSBTAG00000035706	SPAG9;NCOR1;MYOCD
GO:0048172	regulation of short-term neuronal synaptic plasticity	1	13	0.0121387	ENSBTAG00000049618
GO:2000311	regulation of alpha-amino-3-hydroxy-5-methyl-4-isoxazole propionate selective glutamate receptor activity	1	22	0.0204614	ENSBTAG00000049618
GO:0048168	regulation of neuronal synaptic plasticity	1	31	0.0287183	ENSBTAG00000049618
GO:1900449	regulation of glutamate receptor signaling pathway	1	33	0.0305443	ENSBTAG00000049618
GO:0007215	glutamate receptor signaling pathway	1	70	0.06375	ENSBTAG00000049618
GO:0010469	regulation of receptor activity	1	110	0.098447	ENSBTAG00000049618
GO:0048167	regulation of synaptic plasticity	1	118	0.10524	ENSBTAG00000049618
GO:0032412	regulation of ion transmembrane transporter activity	1	144	0.126988	ENSBTAG00000049618
GO:0022898	regulation of transmembrane transporter activity	1	153	0.1344	ENSBTAG00000049618
GO:0032409	regulation of transporter activity	1	161	0.140939	ENSBTAG00000049618
GO:0050804	modulation of synaptic transmission	1	279	0.232164	ENSBTAG00000049618
GO:0034765	regulation of ion transmembrane transport	1	294	0.243087	ENSBTAG00000049618
GO:0034762	regulation of transmembrane transport	1	311	0.25529	ENSBTAG00000049618
GO:0043269	regulation of ion transport	1	412	0.32407	ENSBTAG00000049618
GO:0007268	synaptic transmission	1	453	0.350253	ENSBTAG00000049618
GO:0099537	trans-synaptic signaling	1	456	0.352131	ENSBTAG00000049618
GO:0099536	synaptic signaling	1	463	0.356493	ENSBTAG00000049618
GO:0007267	cell-cell signaling	1	713	0.495403	ENSBTAG00000049618
GO:0051049	regulation of transport	1	1119	0.662759	ENSBTAG00000049618
