# Supplementary material for: A Million-Cow Genome-Wide Association Study of Three Fertility Traits in U.S. Holstein Cows
Source: Int J Mol Sci. 2023 Jun 22;24(13):10496. doi: 10.3390/ijms241310496 (PMC10341978; doi:10.3390/ijms241310496)
Supplement: Supplementary file 1 [file ijms-24-10496-s001.zip › Supplementary_materials/Table_S11.xlsx]

## Sheet: chip_info
Chip_ID	SNP_Density
17	78964
4	75261
42	59448
43	59182
41	58643
37	51247
8	47224
33	43866
5	34014
1	33518
2	33370
27	33225
39	32996
47	31982
34	31942
16	31483
32	31190
11	30470
35	30202
36	30072
40	28289
30	26875
24	26365
26	19131
19	18648
14	15597
20	11565
15	11119
9	10671
10	9994
7	7763
25	7005
